# Supplementary material for: Metabolite Profiling and Transcriptome Analysis Explains Difference in Accumulation of Bioactive Constituents in Licorice (Glycyrrhiza uralensis) Under Salt Stress
Source: Frontiers journal article supplement (doi:10.3389/fpls.2021.727882), 2021-10-07
Supplement: Data_Sheet_1.zip [file Data_Sheet_1.zip]

## Sheet: diff_detail_C_VS_S
Gene_id	Log2FC(Salt/Control)	Pvalue	Padjust	Significant	Regulate	Control	Salt	Control_1	Control_2	Control_3	Salt_1	Salt_2	Salt_3	Gene name	GO_id	KO_id	KO_name	Pathway_id	COG	nr	swissprot	pfam
Glyur002934s00035691	5.91512	6.09e-82	1.33e-77	yes	up	3.39	178.743	3.48	3.83	2.86	213.92	165.57	156.74	Glyur002934s00035691		K14641	APY1_2	map00240(Pyrimidine metabolism); map00230(Purine metabolism)	COG5371(G:Carbohydrate transport and metabolism); COG5371(O:Posttranslational modification, protein turnover, chaperones)	XP_019457419.1(PREDICTED: nucleoside-triphosphatase-like [Lupinus angustifolius])	sp|P52914|NTPA_PEA(Nucleoside-triphosphatase OS=Pisum sativum OX=3888 PE=2 SV=1)	PF01150.14(GDA1_CD39:GDA1/CD39 (nucleoside phosphatase) family)
Glyur000098s00007970	7.50111	1.21e-71	1.32e-67	yes	up	3.27	436.613	4.06	3.64	2.11	321.6	356.03	632.21	Glyur000098s00007970	GO:0006952(biological_process:defense response); GO:0005576(cellular_component:extracellular region); GO:0009607(biological_process:response to biotic stimulus)	K20412	PI16, CRISP9, CD364		COG2340(T:Signal transduction mechanisms)	NP_001235516.1(SCP-like extracellular protein domain-containing protein precursor [Glycine max])	sp|Q40374|PR1_MEDTR(Pathogenesis-related protein PR-1 OS=Medicago truncatula OX=3880 GN=PR-1 PE=2 SV=1)	PF00188.23(CAP:Cysteine-rich secretory protein family)
Glyur000173s00011803	13.6047	2.05e-67	1.5e-63	yes	up	0.19	1945.46	0	0.28	0.29	1721.98	1548.66	2565.74	Glyur000173s00011803	GO:0005199(molecular_function:structural constituent of cell wall)				ENOG41114YU(S:Function unknown); ENOG410YKTH(S:Function unknown); COG0638(S:Function unknown)	PNX94039.1(proline rich protein [Trifolium pratense])	sp|Q00451|PRF1_SOLLC(36.4 kDa proline-rich protein OS=Solanum lycopersicum OX=4081 GN=TPRP-F1 PE=2 SV=1)	PF14547.3(Hydrophob_seed:Hydrophobic seed protein); PF00234.19(Tryp_alpha_amyl:Protease inhibitor/seed storage/LTP family); PF14368.3(LTP_2:Probable lipid transfer)
Glyur000022s00002060	6.7271	2.31e-64	1.26e-60	yes	up	1.29	94.4033	1.92	0.96	0.99	124.08	85.65	73.48	Glyur000022s00002060	GO:0005618(cellular_component:cell wall); GO:0016020(cellular_component:membrane); GO:0005576(cellular_component:extracellular region); GO:0009664(biological_process:plant-type cell wall organization)				ENOG410YCRV(G:Carbohydrate transport and metabolism); ENOG4111DWI(G:Carbohydrate transport and metabolism)	KRG89582.1(hypothetical protein GLYMA_20G033900 [Glycine max])	sp|Q9LDR9|EXP10_ARATH(Expansin-A10 OS=Arabidopsis thaliana OX=3702 GN=EXPA10 PE=2 SV=1)	PF01357.18(Pollen_allerg_1:Pollen allergen); PF03330.15(DPBB_1:Lytic transglycolase)
Glyur000762s00020838	6.36853	5.32e-63	2.33e-59	yes	up	0.853333	53.3267	0.88	1.18	0.5	53.5	47.05	59.43	Glyur000762s00020838	GO:0030570(molecular_function:pectate lyase activity); GO:0045490(biological_process:pectin catabolic process); GO:0046872(molecular_function:metal ion binding)	K01728	pel	map00040(Pentose and glucuronate interconversions); map02024(Quorum sensing)	COG3866(G:Carbohydrate transport and metabolism)	XP_020218108.1(probable pectate lyase 18 [Cajanus cajan])	sp|Q9C5M8|PLY18_ARATH(Probable pectate lyase 18 OS=Arabidopsis thaliana OX=3702 GN=At4g24780 PE=2 SV=2)	PF00544.16(Pec_lyase_C:Pectate lyase); PF13229.3(Beta_helix:Right handed beta helix region)
Glyur000434s00017218	4.15685	3.55e-56	1.29e-52	yes	up	4.92	65.5433	4.49	4.46	5.81	71.58	60.1	64.95	Glyur000434s00017218					ENOG410YEA0(S:Function unknown); ENOG41117GI(S:Function unknown)	NP_001239749.1(uncharacterized protein LOC100804119 precursor [Glycine max])		PF04862.9(DUF642:Protein of unknown function (DUF642))
Glyur000163s00011110	2.43396	6.06e-45	1.89e-41	yes	up	5.15667	20.96	5.45	4.6	5.42	19.76	20.25	22.87	Glyur000163s00011110	GO:0042626(molecular_function:ATPase activity, coupled to transmembrane movement of substances); GO:0016021(cellular_component:integral component of membrane); GO:0055085(biological_process:transmembrane transport); GO:0005524(molecular_function:ATP binding)	K05658	ABCB1, CD243	map05206(MicroRNAs in cancer); map02010(ABC transporters); map04976(Bile secretion); map05226(Gastric cancer)	COG1132(V:Defense mechanisms)	XP_010530473.1(PREDICTED: ABC transporter B family member 1 [Tarenaya hassleriana])	sp|Q9ZR72|AB1B_ARATH(ABC transporter B family member 1 OS=Arabidopsis thaliana OX=3702 GN=ABCB1 PE=1 SV=1)	PF00664.20(ABC_membrane:ABC transporter transmembrane region); PF00005.24(ABC_tran:ABC transporter); PF02463.16(SMC_N:RecF/RecN/SMC N terminal domain); PF13191.3(AAA_16:AAA ATPase domain)
Glyur000195s00012841	5.27119	3.69e-42	1.01e-38	yes	up	7.09667	218.327	5.11	9.24	6.94	275.73	199.87	179.38	Glyur000195s00012841	GO:0004421(molecular_function:hydroxymethylglutaryl-CoA synthase activity); GO:0008299(biological_process:isoprenoid biosynthetic process)	K01641	E2.3.3.10	map00650(Butanoate metabolism); map00280(Valine, leucine and isoleucine degradation); map00072(Synthesis and degradation of ketone bodies); map00900(Terpenoid backbone biosynthesis)	COG3425(I:Lipid transport and metabolism)	NP_001347176.1(putative hydroxymethylglutaryl-CoA synthase [Glycine max])	sp|P54873|HMCS_ARATH(Hydroxymethylglutaryl-CoA synthase OS=Arabidopsis thaliana OX=3702 GN=HMGS PE=1 SV=2)	PF08540.7(HMG_CoA_synt_C:Hydroxymethylglutaryl-coenzyme A synthase C terminal); PF01154.14(HMG_CoA_synt_N:Hydroxymethylglutaryl-coenzyme A synthase N terminal); PF08541.7(ACP_syn_III_C:3-Oxoacyl-[acyl-carrier-protein (ACP)] synthase III C terminal)
Glyur000005s00001040	3.98865	3.34e-38	8.1e-35	yes	up	2.92333	33.81	4.12	2.41	2.24	36.22	31.66	33.55	Glyur000005s00001040	GO:0016021(cellular_component:integral component of membrane)				ENOG4111989(S:Function unknown)	XP_003546306.2(PREDICTED: desiccation-related protein PCC13-62-like [Glycine max])	sp|P22242|DRPE_CRAPL(Desiccation-related protein PCC13-62 OS=Craterostigma plantagineum OX=4153 PE=2 SV=1)	PF13668.3(Ferritin_2:Ferritin-like domain)
Glyur000217s00014848	5.19342	8.65e-37	1.89e-33	yes	up	1.8	40.4367	3.22	1.13	1.05	26.43	41.35	53.53	Glyur000217s00014848	GO:0008757(molecular_function:S-adenosylmethionine-dependent methyltransferase activity); GO:0005829(cellular_component:cytosol); GO:0016740(molecular_function:transferase activity); GO:0008171(molecular_function:O-methyltransferase activity); GO:0008152(biological_process:metabolic process); GO:0008168(molecular_function:methyltransferase activity); GO:0019438(biological_process:aromatic compoun…	K21553	CHMT		ENOG410XS7T(S:Function unknown)	PNX97852.1(isoliquiritigenin 2'-O-methyltransferase-like protein [Trifolium pratense])	sp|P93324|CHOMT_MEDSA(Isoliquiritigenin 2'-O-methyltransferase OS=Medicago sativa OX=3879 PE=1 SV=1)	PF00891.15(Methyltransf_2:O-methyltransferase); PF08100.8(Dimerisation:Dimerisation domain)
Glyur003562s00044258	5.47414	1.19e-36	2.37e-33	yes	up	2.74667	83.4533	2.67	3.4	2.17	111.16	74.99	64.21	Glyur003562s00044258	GO:0004497(molecular_function:monooxygenase activity); GO:0016125(biological_process:sterol metabolic process); GO:0020037(molecular_function:heme binding); GO:0016829(molecular_function:lyase activity); GO:0016705(molecular_function:oxidoreductase activity, acting on paired donors, with incorporation or reduction of molecular oxygen); GO:0005506(molecular_function:iron ion binding); GO:0055114(b…	K01723	AOS	map00592(alpha-Linolenic acid metabolism)	ENOG410Y1KX(Q:Secondary metabolites biosynthesis, transport and catabolism); ENOG410ZAGU(Q:Secondary metabolites biosynthesis, transport and catabolism)	XP_013466725.1(allene oxide synthase 3 [Medicago truncatula])	sp|K4BV52|AOS1_SOLLC(Allene oxide synthase 1, chloroplastic OS=Solanum lycopersicum OX=4081 GN=AOS1 PE=2 SV=1)	PF00067.19(p450:Cytochrome P450)
Glyur002887s00038680	5.11903	1.54e-35	2.8e-32	yes	up	4.64333	117.897	7.65	3.99	2.29	127.42	102.36	123.91	Glyur002887s00038680	GO:0010286(biological_process:heat acclimation); GO:0009751(biological_process:response to salicylic acid); GO:0009506(cellular_component:plasmodesma)				ENOG41116UK(U:Intracellular trafficking, secretion, and vesicular transport); ENOG410YSFV(S:Function unknown); ENOG410YYBC(S:Function unknown)	XP_019177143.1(PREDICTED: protein RSI-1-like [Ipomoea nil])	sp|P47926|RSI1_SOLLC(Protein RSI-1 OS=Solanum lycopersicum OX=4081 GN=RSI-1 PE=2 SV=1)
Glyur000343s00025698	6.2876	1.58e-34	2.66e-31	yes	up	0.16	9.67	0.11	0.23	0.14	8.37	8.74	11.9	Glyur000343s00025698		K09272	SSRP1		COG5165(B:Chromatin structure and dynamics); COG5648(B:Chromatin structure and dynamics)	OIV90275.1(hypothetical protein TanjilG_08312 [Lupinus angustifolius])	sp|Q39601|SSRP1_CATRO(FACT complex subunit SSRP1 OS=Catharanthus roseus OX=4058 GN=SSRP1 PE=2 SV=1)
Glyur000134s00009765	3.20354	2.78e-34	4.35e-31	yes	up	3.32	23.15	3.16	3.6	3.2	22.15	21.43	25.87	Glyur000134s00009765	GO:0016985(molecular_function:mannan endo-1,4-beta-mannosidase activity); GO:0005975(biological_process:carbohydrate metabolic process); GO:0046355(biological_process:mannan catabolic process); GO:0004553(molecular_function:hydrolase activity, hydrolyzing O-glycosyl compounds)	K19355	MAN	map00051(Fructose and mannose metabolism)	COG3934(G:Carbohydrate transport and metabolism); ENOG410Z7Z7(S:Function unknown)	OMO56929.1(Glycoside hydrolase, family 5 [Corchorus capsularis])	sp|Q9FJZ3|MAN7_ARATH(Mannan endo-1,4-beta-mannosidase 7 OS=Arabidopsis thaliana OX=3702 GN=MAN7 PE=2 SV=1)	PF00150.15(Cellulase:Cellulase (glycosyl hydrolase family 5))
Glyur000010s00000892	4.95759	1.01e-31	1.47e-28	yes	up	1.33	28.7233	2.12	1.21	0.66	23.54	22.99	39.64	Glyur000010s00000892	GO:0030570(molecular_function:pectate lyase activity); GO:0045490(biological_process:pectin catabolic process); GO:0046872(molecular_function:metal ion binding)	K01728	pel	map00040(Pentose and glucuronate interconversions); map02024(Quorum sensing)	COG3866(G:Carbohydrate transport and metabolism)	XP_015965406.1(probable pectate lyase 18 [Arachis duranensis])	sp|Q9C5M8|PLY18_ARATH(Probable pectate lyase 18 OS=Arabidopsis thaliana OX=3702 GN=At4g24780 PE=2 SV=2)	PF00544.16(Pec_lyase_C:Pectate lyase); PF13229.3(Beta_helix:Right handed beta helix region)
Glyur000078s00005377	6.75414	4.99e-31	6.81e-28	yes	up	1.52667	110.767	2.44	0.78	1.36	175.3	104.48	52.52	Glyur000078s00005377	GO:0000326(cellular_component:protein storage vacuole); GO:0048316(biological_process:seed development)				ENOG4111CQ0(S:Function unknown); ENOG4111C4C(S:Function unknown); ENOG410YWBX(S:Function unknown)	AFK41878.1(unknown [Medicago truncatula])	sp|O65009|BNM2A_BRANA(BURP domain-containing protein BNM2A OS=Brassica napus OX=3708 GN=BNM2A PE=2 SV=1)	PF03181.12(BURP:BURP domain)
Glyur000078s00005378	7.28477	6.16e-31	7.91e-28	yes	up	0.696667	86.0933	0.35	1.58	0.16	102.92	76.86	78.5	Glyur000078s00005378					ENOG4111DKA(S:Function unknown)	XP_003603905.1(uncharacterized protein LOC11415333 [Medicago truncatula])	sp|P17772|OSS2_PEA(Organ-specific protein S2 OS=Pisum sativum OX=3888 PE=2 SV=1)	PF10950.5(DUF2775:Protein of unknown function (DUF2775))
Glyur000950s00029446	3.30735	1.57e-30	1.8e-27	yes	up	17.2667	129.957	16.07	20.84	14.89	135.68	120.85	133.34	Glyur000950s00029446	GO:0050662(molecular_function:coenzyme binding); GO:0009813(biological_process:flavonoid biosynthetic process); GO:0006952(biological_process:defense response); GO:0003824(molecular_function:catalytic activity); GO:0055114(biological_process:oxidation-reduction process); GO:0016491(molecular_function:oxidoreductase activity)	K13265	VR	map00943(Isoflavonoid biosynthesis)	COG0451(M:Cell wall/membrane/envelope biogenesis)	KRH00563.1(hypothetical protein GLYMA_18G220600 [Glycine max])	sp|Q40316|VESTR_MEDSA(Vestitone reductase OS=Medicago sativa OX=3879 PE=1 SV=1)	PF01370.18(Epimerase:NAD dependent epimerase/dehydratase family); PF07993.9(NAD_binding_4:Male sterility protein); PF01073.16(3Beta_HSD:3-beta hydroxysteroid dehydrogenase/isomerase family); PF16363.2(GDP_Man_Dehyd:GDP-mannose 4,6 dehydratase)
Glyur000038s00004512	3.57467	1.54e-30	1.8e-27	yes	up	2.5	21.9333	3.11	2.19	2.2	24.08	18.4	23.32	Glyur000038s00004512	GO:0016747(molecular_function:transferase activity, transferring acyl groups other than amino-acyl groups)	K15400	HHT1	map00073(Cutin, suberine and wax biosynthesis)	ENOG410XYY6(S:Function unknown)	XP_006581855.1(PREDICTED: omega-hydroxypalmitate O-feruloyl transferase-like isoform X2 [Glycine max])	sp|Q94CD1|HHT1_ARATH(Omega-hydroxypalmitate O-feruloyl transferase OS=Arabidopsis thaliana OX=3702 GN=HHT1 PE=1 SV=1)	PF02458.12(Transferase:Transferase family)
Glyur000690s00025162	7.55512	2.44e-30	2.67e-27	yes	up	70.6667	14143.2	26.22	131.62	54.16	22547.4	12668.1	7214.15	Glyur000690s00025162	GO:0010951(biological_process:negative regulation of endopeptidase activity); GO:0004869(molecular_function:cysteine-type endopeptidase inhibitor activity); GO:0010466(biological_process:negative regulation of peptidase activity); GO:0030414(molecular_function:peptidase inhibitor activity)				ENOG410YZDC(O:Posttranslational modification, protein turnover, chaperones); ENOG411195Y(S:Function unknown)	XP_007154019.1(hypothetical protein PHAVU_003G084300g [Phaseolus vulgaris])	sp|Q41916|CYT5_ARATH(Cysteine proteinase inhibitor 5 OS=Arabidopsis thaliana OX=3702 GN=CYS5 PE=2 SV=2)	PF16845.2(SQAPI:Aspartic acid proteinase inhibitor); PF00031.18(Cystatin:Cystatin domain)
Glyur000137s00013323	2.93753	4.23e-30	4.4e-27	yes	up	3.45	20.09	3.61	3.93	2.81	18.9	20.31	21.06	Glyur000137s00013323	GO:0016020(cellular_component:membrane)				ENOG410Y00J(S:Function unknown)	XP_020211002.1(uncharacterized protein LOC109795855 [Cajanus cajan])		PF13567.3(DUF4131:Domain of unknown function (DUF4131))
Glyur000710s00027837	5.06452	8.59e-30	8.53e-27	yes	up	1.08667	26.1967	1.89	0.56	0.81	25.69	24.87	28.03	Glyur000710s00027837	GO:0046658(cellular_component:anchored component of plasma membrane); GO:0016021(cellular_component:integral component of membrane); GO:0009055(molecular_function:electron carrier activity)				ENOG410YM9R(M:Cell wall/membrane/envelope biogenesis); ENOG410Z7Z7(M:Cell wall/membrane/envelope biogenesis)	XP_016174103.1(lamin-like protein [Arachis ipaensis])	sp|Q39131|LAML_ARATH(Lamin-like protein OS=Arabidopsis thaliana OX=3702 GN=At5g15350 PE=1 SV=1)	PF02298.14(Cu_bind_like:Plastocyanin-like domain)
Glyur000556s00025904	3.57816	5.83e-29	5.54e-26	yes	up	1.21	10.66	1.68	1.04	0.91	11.17	9.53	11.28	Glyur000556s00025904					ENOG4111KEM(S:Function unknown)	XP_003595842.2(uncharacterized protein LOC11421901 [Medicago truncatula])		PF06101.8(DUF946:Plant protein of unknown function (DUF946))
Glyur000237s00014382	5.74753	1.41e-28	1.28e-25	yes	up	0.316667	13.0733	0.1	0.42	0.43	14.71	13.32	11.19	Glyur000237s00014382		K09422	MYBP		COG5147(K:Transcription)	XP_004494411.1(PREDICTED: transcription factor MYB12-like [Cicer arietinum])	sp|Q9LZK4|MYB11_ARATH(Transcription factor MYB11 OS=Arabidopsis thaliana OX=3702 GN=MYB11 PE=1 SV=1)	PF00249.28(Myb_DNA-binding:Myb-like DNA-binding domain); PF13921.3(Myb_DNA-bind_6:Myb-like DNA-binding domain)
Glyur001030s00028208	8.53065	1.6e-28	1.4e-25	yes	up	0.603333	181.997	0.05	1.39	0.37	206.68	161.11	178.2	Glyur001030s00028208		K20628	exlX		ENOG410YCRV(O:Posttranslational modification, protein turnover, chaperones); ENOG410YB3R(G:Carbohydrate transport and metabolism)	GAU41700.1(hypothetical protein TSUD_94220 [Trifolium subterraneum])	sp|Q40636|EXPA2_ORYSJ(Expansin-A2 OS=Oryza sativa subsp. japonica OX=39947 GN=EXPA2 PE=2 SV=2)	PF03330.15(DPBB_1:Lytic transglycolase)
Glyur000106s00011717	2.74146	5.72e-28	4.8e-25	yes	up	3.37333	16.8	4.16	3.14	2.82	17.63	15.14	17.63	Glyur000106s00011717	GO:0005737(cellular_component:cytoplasm); GO:0045548(molecular_function:phenylalanine ammonia-lyase activity); GO:0009800(biological_process:cinnamic acid biosynthetic process); GO:0006559(biological_process:L-phenylalanine catabolic process)	K10775	PAL	map00940(Phenylpropanoid biosynthesis); map00360(Phenylalanine metabolism)	COG2986(E:Amino acid transport and metabolism)	NP_001266106.1(phenylalanine ammonia-lyase 2 [Cicer arietinum])	sp|Q9SMK9|PAL2_CICAR(Phenylalanine ammonia-lyase 2 OS=Cicer arietinum OX=3827 GN=PAL2 PE=2 SV=1)	PF00221.16(Lyase_aromatic:Aromatic amino acid lyase)
Glyur001053s00027286	5.03495	2.67e-27	2.16e-24	yes	up	0.396667	9.49333	0.64	0.4	0.15	10.07	8.87	9.54	Glyur001053s00027286	GO:0030570(molecular_function:pectate lyase activity); GO:0045490(biological_process:pectin catabolic process); GO:0046872(molecular_function:metal ion binding); GO:0016021(cellular_component:integral component of membrane)	K01728	pel	map00040(Pentose and glucuronate interconversions); map02024(Quorum sensing)	COG3866(S:Function unknown)	XP_013450019.1(probable pectate lyase 12 [Medicago truncatula])	sp|Q9SCP2|PLY12_ARATH(Probable pectate lyase 12 OS=Arabidopsis thaliana OX=3702 GN=At3g53190 PE=2 SV=2)	PF00544.16(Pec_lyase_C:Pectate lyase); PF13229.3(Beta_helix:Right handed beta helix region)
Glyur002747s00042594	3.46245	3.37e-27	2.63e-24	yes	up	3.48	29.4	2.81	3.96	3.67	23.92	27.81	36.47	Glyur002747s00042594	GO:0046872(molecular_function:metal ion binding); GO:0051555(biological_process:flavonol biosynthetic process); GO:0045431(molecular_function:flavonol synthase activity); GO:0055114(biological_process:oxidation-reduction process); GO:0016491(molecular_function:oxidoreductase activity)	K05278	FLS	map00941(Flavonoid biosynthesis)	COG3491(S:Function unknown)	AEF14416.1(flavonol synthase [Onobrychis viciifolia])	sp|Q9ZWQ9|FLS_CITUN(Flavonol synthase/flavanone 3-hydroxylase OS=Citrus unshiu OX=55188 GN=FLS PE=1 SV=1)	PF14226.3(DIOX_N:non-haem dioxygenase in morphine synthesis N-terminal); PF03171.17(2OG-FeII_Oxy:2OG-Fe(II) oxygenase superfamily)
Glyur001086s00029539	4.49049	6.03e-27	4.55e-24	yes	up	2.88333	48.8433	1.67	2.38	4.6	53.54	48.37	44.62	Glyur001086s00029539	GO:0005524(molecular_function:ATP binding)	K01648	ACLY	map00020(Citrate cycle (TCA cycle)); map00720(Carbon fixation pathways in prokaryotes)	COG0045(C:Energy production and conversion)	XP_003595886.1(ATP-citrate synthase alpha chain protein 2 [Medicago truncatula])	sp|Q9SGY2|ACLA1_ARATH(ATP-citrate synthase alpha chain protein 1 OS=Arabidopsis thaliana OX=3702 GN=ACLA-1 PE=1 SV=1)	PF16114.2(Citrate_bind:ATP citrate lyase citrate-binding); PF08442.7(ATP-grasp_2:ATP-grasp domain)
Glyur000462s00025056	3.93706	1.04e-26	7.57e-24	yes	up	3.72333	42.7733	2.81	2.53	5.83	40.85	38.72	48.75	Glyur000462s00025056	GO:0003824(molecular_function:catalytic activity)	K01739	metB	map00270(Cysteine and methionine metabolism); map00920(Sulfur metabolism); map00450(Selenocompound metabolism)	COG0626(E:Amino acid transport and metabolism)	XP_003618534.1(cystathionine gamma-synthase 1, chloroplastic isoform X1 [Medicago truncatula])	sp|P55217|CGS1_ARATH(Cystathionine gamma-synthase 1, chloroplastic OS=Arabidopsis thaliana OX=3702 GN=CGS1 PE=1 SV=3)	PF01053.17(Cys_Met_Meta_PP:Cys/Met metabolism PLP-dependent enzyme)
Glyur001016s00027697	4.19603	5.41e-26	3.81e-23	yes	up	1.06667	12.59	1.42	0.66	1.12	12.39	13.65	11.73	Glyur001016s00027697					ENOG410YM8H(S:Function unknown); ENOG41119KI(S:Function unknown)	NP_001238620.2(uncharacterized protein LOC100306423 [Glycine max])	sp|Q6NLC8|Y1648_ARATH(Uncharacterized protein At1g66480 OS=Arabidopsis thaliana OX=3702 GN=At1g66480 PE=2 SV=1)	PF14009.3(DUF4228:Domain of unknown function (DUF4228))
Glyur000468s00019643	3.80253	7.08e-25	4.83e-22	yes	up	1.15	11.7	1.54	0.52	1.39	11.45	11.39	12.26	Glyur000468s00019643	GO:0016020(cellular_component:membrane); GO:0016042(biological_process:lipid catabolic process); GO:0070290(molecular_function:N-acylphosphatidylethanolamine-specific phospholipase D activity); GO:0005509(molecular_function:calcium ion binding); GO:0004630(molecular_function:phospholipase D activity); GO:0046470(biological_process:phosphatidylcholine metabolic process)	K01115	PLD1_2	map00565(Ether lipid metabolism); map00564(Glycerophospholipid metabolism); map05231(Choline metabolism in cancer); map04144(Endocytosis); map04014(Ras signaling pathway); map04024(cAMP signaling pathway); map04072(Phospholipase D signaling pathway); map04928(Parathyroid hormone synthesis, secretion and action); map04071(Sphingolipid signaling pathway); map04724(Glutamatergic synapse); map04666(F…	COG1502(I:Lipid transport and metabolism)	XP_020225703.1(phospholipase D alpha 1 [Cajanus cajan])	sp|O04865|PLDA1_VIGUN(Phospholipase D alpha 1 OS=Vigna unguiculata OX=3917 GN=PLD1 PE=2 SV=1)	PF12357.5(PLD_C:Phospholipase D C terminal); PF00614.19(PLDc:Phospholipase D Active site motif); PF00168.27(C2:C2 domain); PF13091.3(PLDc_2:PLD-like domain)
Glyur000915s00038251	12.4151	1.26e-24	8.37e-22	yes	up	0	3077.86	0	0	0	3191.08	2519.35	3523.14	Glyur000915s00038251
Glyur000541s00027324	3.09077	1.87e-24	1.2e-21	yes	up	30.9367	191.33	40.24	16.57	36	190.26	187.73	196	Glyur000541s00027324	GO:0016021(cellular_component:integral component of membrane)				ENOG410YRBB(S:Function unknown)	XP_004486674.1(PREDICTED: uncharacterized protein LOC101515366 [Cicer arietinum])	sp|Q6NPM5|ATS3B_ARATH(Embryo-specific protein ATS3B OS=Arabidopsis thaliana OX=3702 GN=ATS3B PE=1 SV=1)	PF06232.8(ATS3:Embryo-specific protein 3, (ATS3))
Glyur000391s00016054	5.01965	5.53e-24	3.45e-21	yes	up	0.72	17.9833	0.6	0.94	0.62	11.82	15.84	26.29	Glyur000391s00016054					COG4886(S:Function unknown)	NP_001296651.1(DNA-damage-repair/toleration protein DRT100-like precursor [Cicer arietinum])	sp|Q00874|DR100_ARATH(DNA damage-repair/toleration protein DRT100 OS=Arabidopsis thaliana OX=3702 GN=DRT100 PE=2 SV=2)	PF13855.3(LRR_8:Leucine rich repeat); PF12799.4(LRR_4:Leucine Rich repeats (2 copies)); PF00560.30(LRR_1:Leucine Rich Repeat); PF08263.9(LRRNT_2:Leucine rich repeat N-terminal domain)
Glyur000026s00001957	4.8085	1.13e-23	6.67e-21	yes	up	1.40333	29.7333	1.61	2	0.6	35.19	27.84	26.17	Glyur000026s00001957	GO:0016758(molecular_function:transferase activity, transferring hexosyl groups); GO:0008152(biological_process:metabolic process)				COG1819(S:Function unknown)	XP_003547595.1(PREDICTED: soyasaponin III rhamnosyltransferase-like [Glycine max])	sp|D4Q9Z5|SGT3_SOYBN(Soyasaponin III rhamnosyltransferase OS=Glycine max OX=3847 GN=GmSGT3 PE=1 SV=1)	PF00201.15(UDPGT:UDP-glucoronosyl and UDP-glucosyl transferase)
Glyur001150s00037550	2.47135	1.12e-23	6.67e-21	yes	up	39.0767	164.827	43.73	28.38	45.12	142.59	149.56	202.33	Glyur001150s00037550	GO:0008168(molecular_function:methyltransferase activity); GO:0005829(cellular_component:cytosol); GO:0008171(molecular_function:O-methyltransferase activity); GO:0019438(biological_process:aromatic compound biosynthetic process); GO:0008757(molecular_function:S-adenosylmethionine-dependent methyltransferase activity)	K13066	E2.1.1.68, COMT	map00940(Phenylpropanoid biosynthesis)	ENOG410XS7T(S:Function unknown)	XP_013466818.1(isoliquiritigenin 2'-O-methyltransferase [Medicago truncatula])	sp|Q00763|COMT1_POPTM(Caffeic acid 3-O-methyltransferase 1 OS=Populus tremuloides OX=3693 GN=OMT1 PE=1 SV=1)	PF00891.15(Methyltransf_2:O-methyltransferase); PF08100.8(Dimerisation:Dimerisation domain)
Glyur000910s00020578	3.01157	2.84e-23	1.63e-20	yes	up	3.69	22.08	4.24	3.58	3.25	26.64	21.76	17.84	Glyur000910s00020578	GO:0003824(molecular_function:catalytic activity)	K01904	4CL	map00130(Ubiquinone and other terpenoid-quinone biosynthesis); map00940(Phenylpropanoid biosynthesis); map00360(Phenylalanine metabolism)	COG0318(I:Lipid transport and metabolism); COG0318(Q:Secondary metabolites biosynthesis, transport and catabolism)	XP_003604127.1(4-coumarate--CoA ligase 1 [Medicago truncatula])	sp|O24145|4CL1_TOBAC(4-coumarate--CoA ligase 1 OS=Nicotiana tabacum OX=4097 GN=4CL1 PE=2 SV=1)	PF00501.25(AMP-binding:AMP-binding enzyme); PF13193.3(AMP-binding_C:AMP-binding enzyme C-terminal domain)
Glyur000015s00000775	4.423	3.33e-23	1.86e-20	yes	up	1.43333	23.3167	1.37	1.5	1.43	16.16	17.07	36.72	Glyur000015s00000775	GO:0020037(molecular_function:heme binding); GO:0050896(biological_process:response to stimulus); GO:0009987(biological_process:cellular process); GO:0004601(molecular_function:peroxidase activity); GO:0098869(biological_process:cellular oxidant detoxification); GO:0042744(biological_process:hydrogen peroxide catabolic process); GO:0005488(molecular_function:binding); GO:0008152(biological_proces…	K00430	E1.11.1.7	map00940(Phenylpropanoid biosynthesis)	ENOG410YDTD(S:Function unknown); ENOG4111F7T(G:Carbohydrate transport and metabolism)	XP_019416211.1(PREDICTED: peroxidase 5-like [Lupinus angustifolius])	sp|A7QEU4|PER5_VITVI(Peroxidase 5 OS=Vitis vinifera OX=29760 GN=GSVIVT00037159001 PE=1 SV=2)	PF00141.20(peroxidase:Peroxidase)
Glyur000030s00002284	12.3472	4.3e-23	2.35e-20	yes	up	0	46.1633	0	0	0	61.54	41.77	35.18	Glyur000030s00002284	GO:0031969(cellular_component:chloroplast membrane); GO:0046930(cellular_component:pore complex); GO:0006812(biological_process:cation transport); GO:0006811(biological_process:ion transport); GO:0015288(molecular_function:porin activity); GO:0034220(biological_process:ion transmembrane transport); GO:0031359(cellular_component:integral component of chloroplast outer membrane); GO:0005216(molecul…				ENOG410ZZSD(S:Function unknown)	KYP52063.1(hypothetical protein KK1_025973, partial [Cajanus cajan])	sp|Q4LDF9|OEP37_PEA(Outer envelope pore protein 37, chloroplastic OS=Pisum sativum OX=3888 GN=OEP37 PE=1 SV=1)
Glyur000505s00021223	2.18606	6.93e-23	3.69e-20	yes	up	3.96667	13.5867	4.26	3.94	3.7	12.93	14.19	13.64	Glyur000505s00021223	GO:0005737(cellular_component:cytoplasm); GO:0052684(molecular_function:L-serine hydro-lyase (adding indole, L-tryptophan-forming) activity); GO:0000162(biological_process:tryptophan biosynthetic process); GO:0030170(molecular_function:pyridoxal phosphate binding); GO:0004834(molecular_function:tryptophan synthase activity)	K06001	trpB	map00400(Phenylalanine, tyrosine and tryptophan biosynthesis); map00260(Glycine, serine and threonine metabolism)	COG1350(E:Amino acid transport and metabolism)	KHN15260.1(Tryptophan synthase beta chain 2 [Glycine soja])	sp|Q8Q001|TRPB2_METMA(Tryptophan synthase beta chain 2 OS=Methanosarcina mazei (strain ATCC BAA-159 / DSM 3647 / Goe1 / Go1 / JCM 11833 / OCM 88) OX=192952 GN=trpB2 PE=3 SV=1)	PF00291.22(PALP:Pyridoxal-phosphate dependent enzyme)
Glyur000036s00004630	3.94923	1.19e-22	6.17e-20	yes	up	0.563333	6.47333	0.83	0.48	0.38	5.73	6.19	7.5	Glyur000036s00004630		K09273	UBTF		COG5648(S:Function unknown)	XP_014507301.1(high mobility group B protein 6 [Vigna radiata var. radiata])	sp|Q9T012|HMG13_ARATH(High mobility group B protein 13 OS=Arabidopsis thaliana OX=3702 GN=HMGB13 PE=2 SV=1)	PF00505.16(HMG_box:HMG (high mobility group) box); PF09011.7(HMG_box_2:HMG-box domain)
Glyur000872s00034603	5.12209	3.22e-22	1.63e-19	yes	up	17.77	538.297	7.7	30.74	14.87	345.92	594.33	674.64	Glyur000872s00034603					ENOG410ZIVW(S:Function unknown); ENOG410XWCH(S:Function unknown); ENOG410XV8D(S:Function unknown); ENOG410YNFU(S:Function unknown); ENOG410XQS3(S:Function unknown); ENOG4111JFX(S:Function unknown)	XP_007138464.1(hypothetical protein PHAVU_009G211300g, partial [Phaseolus vulgaris])		PF02095.12(Extensin_1:Extensin-like protein repeat); PF07382.8(HC2:Histone H1-like nucleoprotein HC2)
Glyur000273s00014669	2.1563	5.33e-22	2.65e-19	yes	up	7.19667	24.12	7.78	6.57	7.24	25.27	21.73	25.36	Glyur000273s00014669	GO:0003700(molecular_function:transcription factor activity, sequence-specific DNA binding); GO:0005634(cellular_component:nucleus); GO:0006355(biological_process:regulation of transcription, DNA-templated); GO:0006351(biological_process:transcription, DNA-templated); GO:0003677(molecular_function:DNA binding); GO:0007275(biological_process:multicellular organism development)	K09284	AP2		ENOG410YD13(K:Transcription)	XP_007150248.1(hypothetical protein PHAVU_005G138300g [Phaseolus vulgaris])	sp|Q9SK03|RAP27_ARATH(Ethylene-responsive transcription factor RAP2-7 OS=Arabidopsis thaliana OX=3702 GN=RAP2-7 PE=2 SV=2)	PF00847.17(AP2:AP2 domain)
Glyur000072s00008152	7.2429	8.04e-22	3.9e-19	yes	up	1.15333	120.917	1.07	0.26	2.13	210.58	118.53	33.64	Glyur000072s00008152	GO:0016829(molecular_function:lyase activity); GO:0046872(molecular_function:metal ion binding)	K12742	ispS	map00900(Terpenoid backbone biosynthesis)	ENOG410YF98(O:Posttranslational modification, protein turnover, chaperones)	XP_013464201.1(terpene synthase 10 isoform X1 [Medicago truncatula])	sp|Q93X23|MYRS_QUEIL(Myrcene synthase, chloroplastic OS=Quercus ilex OX=58334 PE=1 SV=1)	PF03936.13(Terpene_synth_C:Terpene synthase family, metal binding domain); PF01397.18(Terpene_synth:Terpene synthase, N-terminal domain); PF01865.13(PhoU_div:Protein of unknown function DUF47)
Glyur000234s00015064	2.46391	1.47e-21	6.83e-19	yes	up	27.8733	116.193	31.32	26.35	25.95	87.91	105.04	155.63	Glyur000234s00015064	GO:0042343(biological_process:indole glucosinolate metabolic process); GO:0004497(molecular_function:monooxygenase activity); GO:0016020(cellular_component:membrane); GO:0047957(molecular_function:4'-methoxyisoflavone 2'-hydroxylase activity); GO:0020037(molecular_function:heme binding); GO:0016709(molecular_function:oxidoreductase activity, acting on paired donors, with incorporation or reductio…	K13260	CYP81E1_7	map00943(Isoflavonoid biosynthesis)	COG2124(Q:Secondary metabolites biosynthesis, transport and catabolism)	XP_003532672.1(PREDICTED: isoflavone 2'-hydroxylase-like [Glycine max])	sp|P93147|C81E1_GLYEC(Isoflavone 2'-hydroxylase OS=Glycyrrhiza echinata OX=46348 GN=CYP81E1 PE=1 SV=2)	PF00067.19(p450:Cytochrome P450)
Glyur000133s00010355	3.02452	1.45e-21	6.83e-19	yes	up	6.91667	42.8433	6.52	8.56	5.67	41.47	38.35	48.71	Glyur000133s00010355	GO:0016787(molecular_function:hydrolase activity); GO:0008152(biological_process:metabolic process)				COG0657(S:Function unknown)	NP_001304576.2(probable carboxylesterase 2 [Glycine max])	sp|Q9SX78|CXE2_ARATH(Probable carboxylesterase 2 OS=Arabidopsis thaliana OX=3702 GN=CXE2 PE=2 SV=1)	PF07859.10(Abhydrolase_3:alpha/beta hydrolase fold); PF00135.25(COesterase:Carboxylesterase family); PF12740.4(Chlorophyllase2:Chlorophyllase enzyme)
Glyur002617s00040165	11.748	1.73e-21	7.9e-19	yes	up	0	45.2633	0	0	0	37.58	37.38	60.83	Glyur002617s00040165	GO:0016021(cellular_component:integral component of membrane); GO:0005576(cellular_component:extracellular region); GO:0019953(biological_process:sexual reproduction)				ENOG410YEZU(G:Carbohydrate transport and metabolism)	KHN05787.1(Putative expansin-B2 [Glycine soja])	sp|Q9SHY6|EXPB2_ARATH(Putative expansin-B2 OS=Arabidopsis thaliana OX=3702 GN=EXPB2 PE=3 SV=2)	PF01357.18(Pollen_allerg_1:Pollen allergen); PF03330.15(DPBB_1:Lytic transglycolase)
Glyur002055s00039240	3.02641	2.33e-21	1.04e-18	yes	up	25.4933	151.073	30.67	19.63	26.18	197.29	142.95	112.98	Glyur002055s00039240					ENOG410YZUA(S:Function unknown); ENOG410YGJA(S:Function unknown)	AFK41387.1(unknown [Lotus japonicus])	sp|Q9SS03|DIR21_ARATH(Dirigent protein 21 OS=Arabidopsis thaliana OX=3702 GN=DIR21 PE=3 SV=1)	PF03018.11(Dirigent:Dirigent-like protein)
Glyur000638s00037802	4.28407	3.87e-21	1.69e-18	yes	up	0.25	3.66667	0.24	0.22	0.29	3.31	3.62	4.07	Glyur000638s00037802	GO:0046658(cellular_component:anchored component of plasma membrane); GO:0030247(molecular_function:polysaccharide binding); GO:0005975(biological_process:carbohydrate metabolic process); GO:0004553(molecular_function:hydrolase activity, hydrolyzing O-glycosyl compounds)	K19891	GN1_2_3	map00500(Starch and sucrose metabolism)	ENOG410ZF4V(S:Function unknown)	XP_020212125.1(glucan endo-1,3-beta-glucosidase 2-like [Cajanus cajan])	sp|Q9C7U5|E132_ARATH(Glucan endo-1,3-beta-glucosidase 2 OS=Arabidopsis thaliana OX=3702 GN=At1g66250 PE=1 SV=2)	PF00332.15(Glyco_hydro_17:Glycosyl hydrolases family 17); PF07983.10(X8:X8 domain)
Glyur000005s00000998	1.73899	4.2e-21	1.8e-18	yes	up	32.1833	80.2167	37.09	29.25	30.21	78.83	74.33	87.49	Glyur000005s00000998	GO:0046912(molecular_function:transferase activity, transferring acyl groups, acyl groups converted into alkyl on transfer); GO:0008152(biological_process:metabolic process)	K01648	ACLY	map00020(Citrate cycle (TCA cycle)); map00720(Carbon fixation pathways in prokaryotes)	COG0372(C:Energy production and conversion)	XP_007147365.1(hypothetical protein PHAVU_006G118100g [Phaseolus vulgaris])	sp|Q9C522|ACLB1_ARATH(ATP-citrate synthase beta chain protein 1 OS=Arabidopsis thaliana OX=3702 GN=ACLB-1 PE=2 SV=1)	PF00285.18(Citrate_synt:Citrate synthase, C-terminal domain); PF00549.16(Ligase_CoA:CoA-ligase)
Glyur004892s00040930	2.9373	4.41e-21	1.85e-18	yes	up	0.37	2.13333	0.35	0.31	0.45	1.97	2.43	2	Glyur004892s00040930	GO:0016020(cellular_component:membrane); GO:0006810(biological_process:transport); GO:0016887(molecular_function:ATPase activity); GO:0000166(molecular_function:nucleotide binding)	K05666	ABCC2	map01523(Antifolate resistance); map02010(ABC transporters); map04976(Bile secretion); map01524(Platinum drug resistance)	COG1132(T:Signal transduction mechanisms)	XP_007199676.1(ABC transporter C family member 14 [Prunus persica])	sp|Q7DM58|AB4C_ARATH(ABC transporter C family member 4 OS=Arabidopsis thaliana OX=3702 GN=ABCC4 PE=1 SV=2)	PF00005.24(ABC_tran:ABC transporter); PF00664.20(ABC_membrane:ABC transporter transmembrane region); PF01935.14(DUF87:Domain of unknown function DUF87)
Glyur002303s00038706	3.27726	5.49e-21	2.26e-18	yes	up	3.02333	20.8867	4.58	1.96	2.53	18.35	17.17	27.14	Glyur002303s00038706	GO:0016020(cellular_component:membrane)				COG0666(S:Function unknown)	XP_024639230.1(uncharacterized protein LOC112421788 [Medicago truncatula])		PF13962.3(PGG:Domain of unknown function); PF12796.4(Ank_2:Ankyrin repeats (3 copies)); PF13961.3(DUF4219:Domain of unknown function (DUF4219)); PF13637.3(Ank_4:Ankyrin repeats (many copies)); PF13606.3(Ank_3:Ankyrin repeat); PF14223.3(Retrotran_gag_2:gag-polypeptide of LTR copia-type)
Glyur001733s00027628	5.77917	1.13e-20	4.58e-18	yes	up	4.42333	196.18	1.91	8.96	2.4	219.34	189.17	180.03	Glyur001733s00027628	GO:0016866(molecular_function:intramolecular transferase activity)	K15813	LUP4	map00909(Sesquiterpenoid and triterpenoid biosynthesis)	COG1657(I:Lipid transport and metabolism)	ADE88148.1(beta-amyrin synthase [Glycyrrhiza uralensis])	sp|Q9MB42|BAMS_GLYGL(Beta-amyrin synthase OS=Glycyrrhiza glabra OX=49827 GN=GgbAS1 PE=1 SV=1)	PF13243.3(SQHop_cyclase_C:Squalene-hopene cyclase C-terminal domain); PF13249.3(SQHop_cyclase_N:Squalene-hopene cyclase N-terminal domain); PF00432.18(Prenyltrans:Prenyltransferase and squalene oxidase repeat)
Glyur000872s00034605	4.62831	1.24e-20	4.94e-18	yes	up	99.9267	2134.19	35.11	147.02	117.65	1507.13	2258.46	2636.98	Glyur000872s00034605					ENOG410ZIVW(S:Function unknown); ENOG410XWCH(S:Function unknown)	XP_007138464.1(hypothetical protein PHAVU_009G211300g, partial [Phaseolus vulgaris])		PF02095.12(Extensin_1:Extensin-like protein repeat)
Glyur000864s00030257	2.2699	2.49e-20	9.73e-18	yes	up	12.2367	43.5467	14.21	8.17	14.33	39.12	42.02	49.5	Glyur000864s00030257					COG5183(S:Function unknown)	XP_020233779.1(uncharacterized protein LOC109813901 [Cajanus cajan])		PF12906.4(RINGv:RING-variant domain)
Glyur001670s00039738	2.59553	2.57e-20	9.85e-18	yes	up	4.50333	20.1967	4.93	3.36	5.22	18.6	17.29	24.7	Glyur001670s00039738	GO:0016021(cellular_component:integral component of membrane)	K20929	GLX		ENOG41110V0(O:Posttranslational modification, protein turnover, chaperones)	XP_016183788.1(aldehyde oxidase GLOX [Arachis ipaensis])	sp|Q3HRQ2|GLOX_VITPS(Aldehyde oxidase GLOX OS=Vitis pseudoreticulata OX=231512 GN=GLOX PE=2 SV=1)	PF07250.8(Glyoxal_oxid_N:Glyoxal oxidase N-terminus); PF09118.8(DUF1929:Domain of unknown function (DUF1929))
Glyur001036s00023778	2.7001	3.96e-20	1.49e-17	yes	up	11.7633	57.8533	9.87	12.78	12.64	66.01	57.71	49.84	Glyur001036s00023778	GO:0008460(molecular_function:dTDP-glucose 4,6-dehydratase activity); GO:0009225(biological_process:nucleotide-sugar metabolic process)	K12450	RHM	map00520(Amino sugar and nucleotide sugar metabolism)	COG1088(M:Cell wall/membrane/envelope biogenesis)	XP_006585326.1(PREDICTED: trifunctional UDP-glucose 4,6-dehydratase/UDP-4-keto-6-deoxy-D-glucose 3,5-epimerase/UDP-4-keto-L-rhamnose-reductase RHM1 isoform X1 [Glycine max])	sp|Q9SYM5|RHM1_ARATH(Trifunctional UDP-glucose 4,6-dehydratase/UDP-4-keto-6-deoxy-D-glucose 3,5-epimerase/UDP-4-keto-L-rhamnose-reductase RHM1 OS=Arabidopsis thaliana OX=3702 GN=RHM1 PE=1 SV=1)	PF16363.2(GDP_Man_Dehyd:GDP-mannose 4,6 dehydratase); PF01370.18(Epimerase:NAD dependent epimerase/dehydratase family); PF04321.14(RmlD_sub_bind:RmlD substrate binding domain); PF01073.16(3Beta_HSD:3-beta hydroxysteroid dehydrogenase/isomerase family); PF02719.12(Polysacc_synt_2:Polysaccharide biosynthesis protein); PF07993.9(NAD_binding_4:Male sterility protein)
Glyur000035s00005005	4.96764	4.12e-20	1.53e-17	yes	up	82.7867	2493.57	70.51	117.51	60.34	4047.67	2395.27	1037.77	Glyur000035s00005005
Glyur003314s00037686	5.52487	4.3e-20	1.57e-17	yes	up	0.133333	4.43333	0.26	0.07	0.07	3.55	4.58	5.17	Glyur003314s00037686	GO:0005975(biological_process:carbohydrate metabolic process); GO:0008810(molecular_function:cellulase activity); GO:0030245(biological_process:cellulose catabolic process); GO:0004553(molecular_function:hydrolase activity, hydrolyzing O-glycosyl compounds)				ENOG410XPC9(G:Carbohydrate transport and metabolism)	PSS11316.1(Endoglucanase [Actinidia chinensis var. chinensis])	sp|O48766|GUN11_ARATH(Endoglucanase 11 OS=Arabidopsis thaliana OX=3702 GN=At2g32990 PE=2 SV=1)	PF00759.16(Glyco_hydro_9:Glycosyl hydrolase family 9)
Glyur000017s00002413	2.43494	5.74e-20	2.06e-17	yes	up	19.7533	90.44	20.61	19.15	19.5	110.49	79.93	80.9	Glyur000017s00002413	GO:0016021(cellular_component:integral component of membrane); GO:0004310(molecular_function:farnesyl-diphosphate farnesyltransferase activity); GO:0008610(biological_process:lipid biosynthetic process)	K00801	FDFT1	map00909(Sesquiterpenoid and triterpenoid biosynthesis); map00100(Steroid biosynthesis)	COG1562(V:Defense mechanisms)	CAJ77653.1(squalene synthase 2 [Glycyrrhiza uralensis])	sp|P53800|FDFT_NICBE(Squalene synthase OS=Nicotiana benthamiana OX=4100 PE=2 SV=1)	PF00494.16(SQS_PSY:Squalene/phytoene synthase)
Glyur000814s00023356	3.13397	5.86e-20	2.07e-17	yes	up	4.06667	27.3233	3.11	4.16	4.93	20.53	26.42	35.02	Glyur000814s00023356					ENOG41104ZI(U:Intracellular trafficking, secretion, and vesicular transport)	XP_007155863.1(hypothetical protein PHAVU_003G238200g [Phaseolus vulgaris])
Glyur000487s00025917	7.8562	1.06e-19	3.69e-17	yes	up	0.17	30.7733	0	0.51	0	37.64	24.63	30.05	Glyur000487s00025917	GO:0004857(molecular_function:enzyme inhibitor activity); GO:0071944(cellular_component:cell periphery); GO:0046910(molecular_function:pectinesterase inhibitor activity); GO:0030599(molecular_function:pectinesterase activity)				ENOG410YUUD(S:Function unknown)	XP_003519742.1(PREDICTED: uncharacterized protein LOC100793343 [Glycine max])		PF04043.12(PMEI:Plant invertase/pectin methylesterase inhibitor)
Glyur002600s00039903	-2.7447	1.19e-19	4.01e-17	yes	down	25.23	2.88667	28.79	27.82	19.08	2.19	3.77	2.7	Glyur002600s00039903		K13457	RPM1, RPS3	map04626(Plant-pathogen interaction)	COG4886(S:Function unknown)	XP_013459955.1(disease resistance protein RPM1 [Medicago truncatula])	sp|Q39214|RPM1_ARATH(Disease resistance protein RPM1 OS=Arabidopsis thaliana OX=3702 GN=RPM1 PE=1 SV=1)	PF00931.19(NB-ARC:NB-ARC domain); PF13401.3(AAA_22:AAA domain); PF13855.3(LRR_8:Leucine rich repeat)
Glyur000095s00007049	11.8161	1.19e-19	4.01e-17	yes	up	0	8.17	0	0	0	12.43	7.83	4.25	Glyur000095s00007049	GO:0005524(molecular_function:ATP binding)	K08900	BCS1		COG0465(O:Posttranslational modification, protein turnover, chaperones)	XP_016183648.1(protein HYPER-SENSITIVITY-RELATED 4-like [Arachis ipaensis])	sp|Q8VZG2|HSR4_ARATH(Protein HYPER-SENSITIVITY-RELATED 4 OS=Arabidopsis thaliana OX=3702 GN=HSR4 PE=2 SV=1)	PF00004.26(AAA:ATPase family associated with various cellular activities (AAA)); PF13245.3(AAA_19:Part of AAA domain); PF13086.3(AAA_11:AAA domain); PF13191.3(AAA_16:AAA ATPase domain); PF13479.3(AAA_24:AAA domain); PF13555.3(AAA_29:P-loop containing region of AAA domain)
Glyur000989s00020260	2.49591	1.63e-19	5.31e-17	yes	up	2.14333	8.78667	1.94	1.95	2.54	9.21	8.97	8.18	Glyur000989s00020260	GO:0052692(molecular_function:raffinose alpha-galactosidase activity); GO:0005975(biological_process:carbohydrate metabolic process)				ENOG410ZVDU(S:Function unknown); ENOG410XPF1(G:Carbohydrate transport and metabolism)	XP_019464188.1(PREDICTED: uncharacterized protein LOC109362678 isoform X2 [Lupinus angustifolius])	sp|Q9URZ0|AGAL_SCHPO(Alpha-galactosidase mel1 OS=Schizosaccharomyces pombe (strain 972 / ATCC 24843) OX=284812 GN=mel1 PE=3 SV=1)	PF16499.2(Melibiase_2:Alpha galactosidase A)
Glyur002934s00035694	11.3722	1.63e-19	5.31e-17	yes	up	0	87.9733	0	0	0	115.39	86.9	61.63	Glyur002934s00035694		K14641	APY1_2	map00240(Pyrimidine metabolism); map00230(Purine metabolism)	COG5371(G:Carbohydrate transport and metabolism); COG5371(O:Posttranslational modification, protein turnover, chaperones)	NP_001340292.1(ecto-apyrase GS52 precursor [Glycine max])	sp|P52914|NTPA_PEA(Nucleoside-triphosphatase OS=Pisum sativum OX=3888 PE=2 SV=1)	PF01150.14(GDA1_CD39:GDA1/CD39 (nucleoside phosphatase) family)
Glyur001432s00041276	8.52935	2.02e-19	6.48e-17	yes	up	0.05	14.1	0	0.15	0	17.56	14.59	10.15	Glyur001432s00041276	GO:0016740(molecular_function:transferase activity); GO:0016746(molecular_function:transferase activity, transferring acyl groups)				ENOG4111A8V(S:Function unknown); ENOG410ZNPA(S:Function unknown); ENOG410Z33Z(S:Function unknown); ENOG410YB7X(S:Function unknown)	XP_013447578.1(phenolic glucoside malonyltransferase 1 [Medicago truncatula])	sp|Q940Z5|PMAT1_ARATH(Phenolic glucoside malonyltransferase 1 OS=Arabidopsis thaliana OX=3702 GN=PMAT1 PE=1 SV=1)	PF02458.12(Transferase:Transferase family)
Glyur000028s00003509	4.76004	3.02e-19	9.57e-17	yes	up	0.936667	19.2533	1.09	1.43	0.29	19.48	19.19	19.09	Glyur000028s00003509	GO:0004553(molecular_function:hydrolase activity, hydrolyzing O-glycosyl compounds); GO:0005975(biological_process:carbohydrate metabolic process); GO:0046355(biological_process:mannan catabolic process); GO:0016985(molecular_function:mannan endo-1,4-beta-mannosidase activity)	K19355	MAN	map00051(Fructose and mannose metabolism)	COG3934(G:Carbohydrate transport and metabolism)	XP_003528027.1(PREDICTED: mannan endo-1,4-beta-mannosidase 7 [Glycine max])	sp|Q9FJZ3|MAN7_ARATH(Mannan endo-1,4-beta-mannosidase 7 OS=Arabidopsis thaliana OX=3702 GN=MAN7 PE=2 SV=1)	PF00150.15(Cellulase:Cellulase (glycosyl hydrolase family 5))
Glyur002759s00037154	3.89749	3.07e-19	9.58e-17	yes	up	0.996667	11.23	1.01	1.28	0.7	11.53	12.29	9.87	Glyur002759s00037154	GO:0071281(biological_process:cellular response to iron ion); GO:0071421(biological_process:manganese ion transmembrane transport); GO:0030026(biological_process:cellular manganese ion homeostasis); GO:0016021(cellular_component:integral component of membrane); GO:0006880(biological_process:intracellular sequestering of iron ion); GO:0005774(cellular_component:vacuolar membrane); GO:0005381(molec…				COG1814(K:Transcription)	GAU12884.1(hypothetical protein TSUD_73710 [Trifolium subterraneum])	sp|Q9ZUA5|VIT1_ARATH(Vacuolar iron transporter 1 OS=Arabidopsis thaliana OX=3702 GN=VIT1 PE=2 SV=1)	PF01988.16(VIT1:VIT family)
Glyur000051s00003428	3.46037	3.55e-19	1.09e-16	yes	up	12.6633	86.03	16.72	6.12	15.15	73.7	72.11	112.28	Glyur000051s00003428		K00660	CHS	map04712(Circadian rhythm - plant); map00941(Flavonoid biosynthesis)	COG3424(Q:Secondary metabolites biosynthesis, transport and catabolism)	PON37114.1(Thiolase-like [Parasponia andersonii])	sp|P51083|CHS1_TRISU(Chalcone synthase 1 OS=Trifolium subterraneum OX=3900 GN=CHS1 PE=3 SV=1)	PF00195.16(Chal_sti_synt_N:Chalcone and stilbene synthases, N-terminal domain); PF02797.12(Chal_sti_synt_C:Chalcone and stilbene synthases, C-terminal domain); PF08541.7(ACP_syn_III_C:3-Oxoacyl-[acyl-carrier-protein (ACP)] synthase III C terminal); PF08545.7(ACP_syn_III:3-Oxoacyl-[acyl-carrier-protein (ACP)] synthase III); PF08392.9(FAE1_CUT1_RppA:FAE1/Type III polyketide synthase-like protein)
Glyur000615s00024007	3.5994	4.05e-19	1.23e-16	yes	up	1.31667	11.9667	1.56	1.49	0.9	11.6	9.57	14.73	Glyur000615s00024007	GO:0016192(biological_process:vesicle-mediated transport); GO:0016021(cellular_component:integral component of membrane); GO:0005622(cellular_component:intracellular); GO:0061025(biological_process:membrane fusion); GO:0005484(molecular_function:SNAP receptor activity); GO:0006886(biological_process:intracellular protein transport)	K08486	STX1B_2_3	map04130(SNARE interactions in vesicular transport); map04721(Synaptic vesicle cycle)	COG5074(U:Intracellular trafficking, secretion, and vesicular transport)	NP_001237111.2(SNARE superfamily protein [Glycine max])	sp|Q8VZU2|SY132_ARATH(Syntaxin-132 OS=Arabidopsis thaliana OX=3702 GN=SYP132 PE=1 SV=1)	PF00804.22(Syntaxin:Syntaxin); PF05739.16(SNARE:SNARE domain)
Glyur003616s00034786	1.67336	4.78e-19	1.43e-16	yes	up	40.9067	99.84	44.86	38.22	39.64	90.82	92.37	116.33	Glyur003616s00034786	GO:0016020(cellular_component:membrane)				ENOG4111ME2(S:Function unknown)	XP_020217322.1(uncharacterized protein LOC109800833 isoform X1 [Cajanus cajan])	sp|Q8L7A0|TAUE3_ARATH(Sulfite exporter TauE/SafE family protein 3 OS=Arabidopsis thaliana OX=3702 GN=At2g25737 PE=2 SV=1)	PF01925.16(TauE:Sulfite exporter TauE/SafE)
Glyur000088s00007722	3.05704	6.76e-19	2e-16	yes	up	5.82667	36.9733	4.47	6.55	6.46	43.61	34.36	32.95	Glyur000088s00007722	GO:0005737(cellular_component:cytoplasm); GO:0004161(molecular_function:dimethylallyltranstransferase activity); GO:0016740(molecular_function:transferase activity); GO:0045337(biological_process:farnesyl diphosphate biosynthetic process); GO:0008299(biological_process:isoprenoid biosynthetic process); GO:0004337(molecular_function:geranyltranstransferase activity); GO:0006695(biological_process:…	K00787	FDPS	map05166(Human T-cell leukemia virus 1 infection); map05164(Influenza A); map00900(Terpenoid backbone biosynthesis)	COG0142(S:Function unknown)	ADE18770.1(farnesyl-diphosphate synthase [Glycyrrhiza uralensis])	sp|P49351|FPPS1_LUPAL(Farnesyl pyrophosphate synthase 1 OS=Lupinus albus OX=3870 GN=FPS1 PE=2 SV=1)	PF00348.14(polyprenyl_synt:Polyprenyl synthetase)
Glyur001280s00031952	5.93612	7.08e-19	2.06e-16	yes	up	15.91	683.817	0	28.9	18.83	682.44	589.38	779.63	Glyur001280s00031952	GO:0006508(biological_process:proteolysis); GO:0010466(biological_process:negative regulation of peptidase activity); GO:0030414(molecular_function:peptidase inhibitor activity)				ENOG410ZCRC(O:Posttranslational modification, protein turnover, chaperones)	BAF50740.1(trypsin inhibitor [Apios americana])	sp|Q41066|IBB2_PEA(Seed trypsin/chymotrypsin inhibitor TI5-72 OS=Pisum sativum OX=3888 GN=TI572 PE=2 SV=1)	PF00228.17(Bowman-Birk_leg:Bowman-Birk serine protease inhibitor family)
Glyur001396s00035584	3.39485	1.03e-18	2.95e-16	yes	up	2.16333	17.3667	1.66	2.62	2.21	20.73	19.41	11.96	Glyur001396s00035584	GO:0005622(cellular_component:intracellular)				ENOG41117WZ(S:Function unknown); ENOG410YEEE(S:Function unknown)	KHN12210.1(hypothetical protein glysoja_031558 [Glycine soja])		PF07891.9(DUF1666:Protein of unknown function (DUF1666))
Glyur000218s00011634	3.85218	1.17e-18	3.33e-16	yes	up	1.27667	14.76	1.42	1.54	0.87	9.73	14.25	20.3	Glyur000218s00011634	GO:0005886(cellular_component:plasma membrane)				ENOG410YHS4(M:Cell wall/membrane/envelope biogenesis)	PNX91041.1(fasciclin-like arabinogalactan protein 7-like [Trifolium pratense])	sp|Q9SJ81|FLA7_ARATH(Fasciclin-like arabinogalactan protein 7 OS=Arabidopsis thaliana OX=3702 GN=FLA7 PE=1 SV=1)	PF02469.19(Fasciclin:Fasciclin domain)
Glyur001992s00038070	3.67244	1.37e-18	3.83e-16	yes	up	0.28	2.65	0.34	0.19	0.31	2.2	2.86	2.89	Glyur001992s00038070	GO:0006468(biological_process:protein phosphorylation); GO:0016020(cellular_component:membrane); GO:0016021(cellular_component:integral component of membrane); GO:0005524(molecular_function:ATP binding); GO:0004672(molecular_function:protein kinase activity)				COG0515(T:Signal transduction mechanisms); COG4886(S:Function unknown)	XP_020239154.1(probably inactive leucine-rich repeat receptor-like protein kinase IMK2 [Cajanus cajan])	sp|Q9SCT4|IMK2_ARATH(Probably inactive leucine-rich repeat receptor-like protein kinase IMK2 OS=Arabidopsis thaliana OX=3702 GN=IMK2 PE=1 SV=1)	PF07714.14(Pkinase_Tyr:Protein tyrosine kinase); PF00069.22(Pkinase:Protein kinase domain); PF13855.3(LRR_8:Leucine rich repeat); PF12799.4(LRR_4:Leucine Rich repeats (2 copies)); PF08263.9(LRRNT_2:Leucine rich repeat N-terminal domain)
Glyur000173s00011838	2.77206	1.42e-18	3.92e-16	yes	up	1.82	9.24333	1.98	1.19	2.29	7.9	9.49	10.34	Glyur000173s00011838	GO:0005315(molecular_function:inorganic phosphate transmembrane transporter activity); GO:0016021(cellular_component:integral component of membrane); GO:0006817(biological_process:phosphate ion transport); GO:0055085(biological_process:transmembrane transport)	K08176	PHO84		ENOG410ZVN7(G:Carbohydrate transport and metabolism)	XP_004502147.1(PREDICTED: inorganic phosphate transporter 1-4-like [Cicer arietinum])	sp|Q96303|PHT14_ARATH(Inorganic phosphate transporter 1-4 OS=Arabidopsis thaliana OX=3702 GN=PHT1-4 PE=1 SV=1)	PF00083.21(Sugar_tr:Sugar (and other) transporter); PF07690.13(MFS_1:Major Facilitator Superfamily)
Glyur000289s00018722	4.2987	1.76e-18	4.78e-16	yes	up	1.11	19.4	0.46	1.67	1.2	19.31	19.77	19.12	Glyur000289s00018722	GO:0043231(cellular_component:intracellular membrane-bounded organelle); GO:0052696(biological_process:flavonoid glucuronidation); GO:0009813(biological_process:flavonoid biosynthetic process); GO:0080043(molecular_function:quercetin 3-O-glucosyltransferase activity); GO:0016740(molecular_function:transferase activity); GO:0080044(molecular_function:quercetin 7-O-glucosyltransferase activity); GO…				COG1819(S:Function unknown)	XP_003620191.1(UDP-glycosyltransferase 708D1 [Medicago truncatula])	sp|I1L3T1|708D1_SOYBN(UDP-glycosyltransferase 708D1 OS=Glycine max OX=3847 GN=UGT708D1 PE=1 SV=1)	PF00201.15(UDPGT:UDP-glucoronosyl and UDP-glucosyl transferase)
Glyur000330s00019515	2.17237	1.77e-18	4.78e-16	yes	up	11.4767	39.2267	10.36	12.28	11.79	34.19	40.9	42.59	Glyur000330s00019515	GO:0020037(molecular_function:heme binding); GO:0016021(cellular_component:integral component of membrane); GO:0004601(molecular_function:peroxidase activity); GO:0098869(biological_process:cellular oxidant detoxification); GO:0042744(biological_process:hydrogen peroxide catabolic process); GO:0046872(molecular_function:metal ion binding); GO:0006979(biological_process:response to oxidative stres…	K00430	E1.11.1.7	map00940(Phenylpropanoid biosynthesis)	ENOG4111FDS(G:Carbohydrate transport and metabolism); ENOG410YA7M(G:Carbohydrate transport and metabolism)	XP_003543486.1(PREDICTED: peroxidase 31-like [Glycine max])	sp|Q9LHA7|PER31_ARATH(Peroxidase 31 OS=Arabidopsis thaliana OX=3702 GN=PER31 PE=2 SV=1)	PF00141.20(peroxidase:Peroxidase)
Glyur002504s00041877	-3.29477	2.7e-18	7.18e-16	yes	down	72.5567	4.52333	85.52	93.71	38.44	3.32	6.36	3.89	Glyur002504s00041877
Glyur004998s00040146	-3.54391	3.61e-18	9.5e-16	yes	down	65.49	4.01333	54.78	74.23	67.46	2.26	6.69	3.09	Glyur004998s00040146
Glyur000015s00000778	2.93583	3.99e-18	1.02e-15	yes	up	15.0733	84.48	16.53	12.78	15.91	114.08	80.19	59.17	Glyur000015s00000778	GO:0008757(molecular_function:S-adenosylmethionine-dependent methyltransferase activity); GO:0005829(cellular_component:cytosol); GO:0008171(molecular_function:O-methyltransferase activity); GO:0019438(biological_process:aromatic compound biosynthetic process); GO:0046983(molecular_function:protein dimerization activity); GO:0032259(biological_process:methylation)	K05279;K13066	E2.1.1.76;E2.1.1.68, COMT	map00940(Phenylpropanoid biosynthesis); map00944(Flavone and flavonol biosynthesis)	ENOG410XS7T(S:Function unknown)	AEV93478.1(caffeic acid O-methyltransferase [Caragana korshinskii])	sp|P28002|COMT1_MEDSA(Caffeic acid 3-O-methyltransferase OS=Medicago sativa OX=3879 PE=1 SV=1)	PF00891.15(Methyltransf_2:O-methyltransferase); PF08100.8(Dimerisation:Dimerisation domain); PF05891.9(Methyltransf_PK:AdoMet dependent proline di-methyltransferase)
Glyur000841s00026256	10.8732	3.98e-18	1.02e-15	yes	up	0	12.91	0	0	0	16.18	12.35	10.2	Glyur000841s00026256	GO:0005737(cellular_component:cytoplasm); GO:0006729(biological_process:tetrahydrobiopterin biosynthetic process); GO:0003934(molecular_function:GTP cyclohydrolase I activity); GO:0008270(molecular_function:zinc ion binding); GO:0046654(biological_process:tetrahydrofolate biosynthetic process); GO:0005525(molecular_function:GTP binding)	K01495	GCH1, folE	map00790(Folate biosynthesis)	COG0302(H:Coenzyme transport and metabolism)	XP_020206402.1(GTP cyclohydrolase 1-like [Cajanus cajan])	sp|Q8VYU3|GCH1_SOLLC(GTP cyclohydrolase 1 OS=Solanum lycopersicum OX=4081 GN=GCH1 PE=1 SV=1)	PF01227.19(GTP_cyclohydroI:GTP cyclohydrolase I)
Glyur000663s00030877	4.32015	4.02e-18	1.02e-15	yes	up	0.886667	15.1967	0.31	0.97	1.38	16.03	13.96	15.6	Glyur000663s00030877					ENOG410YKFD(S:Function unknown)	XP_007149321.1(hypothetical protein PHAVU_005G060700g [Phaseolus vulgaris])	sp|Q9M9F9|ICR4_ARATH(Interactor of constitutive active ROPs 4 OS=Arabidopsis thaliana OX=3702 GN=ICR4 PE=1 SV=2)	PF06818.12(Fez1:Fez1); PF11559.5(ADIP:Afadin- and alpha -actinin-Binding)
Glyur008920s00047250	10.7715	4.56e-18	1.15e-15	yes	up	0	62.8467	0	0	0	55.52	51.03	81.99	Glyur008920s00047250	GO:0005975(biological_process:carbohydrate metabolic process); GO:0008152(biological_process:metabolic process); GO:0004553(molecular_function:hydrolase activity, hydrolyzing O-glycosyl compounds)	K01183	E3.2.1.14	map00520(Amino sugar and nucleotide sugar metabolism)	ENOG4111GPA(G:Carbohydrate transport and metabolism)	CAA88593.1(chitinase homologue [Sesbania rostrata])	sp|P51614|CHIT3_VITVI(Acidic endochitinase OS=Vitis vinifera OX=29760 GN=CHIT3 PE=2 SV=1)	PF00704.25(Glyco_hydro_18:Glycosyl hydrolases family 18)
Glyur000399s00017828	3.99788	4.84e-18	1.2e-15	yes	up	0.6	7.13667	0.99	0.33	0.48	7.03	7.11	7.27	Glyur000399s00017828	GO:0004519(molecular_function:endonuclease activity); GO:0016788(molecular_function:hydrolase activity, acting on ester bonds); GO:0006308(biological_process:DNA catabolic process); GO:0090304(biological_process:nucleic acid metabolic process); GO:0090305(biological_process:nucleic acid phosphodiester bond hydrolysis); GO:0003676(molecular_function:nucleic acid binding)				ENOG410ZWW3(S:Function unknown); ENOG4111UE2(S:Function unknown)	XP_019459309.1(PREDICTED: endonuclease 2-like [Lupinus angustifolius])	sp|Q9C9G4|ENDO2_ARATH(Endonuclease 2 OS=Arabidopsis thaliana OX=3702 GN=ENDO2 PE=1 SV=1)	PF02265.13(S1-P1_nuclease:S1/P1 Nuclease)
Glyur000073s00007772	4.75497	6.09e-18	1.5e-15	yes	up	0.3	5.95	0.53	0.21	0.16	6.13	6.3	5.42	Glyur000073s00007772					ENOG41113IN(S:Function unknown); ENOG410ZCUP(S:Function unknown); ENOG410YR0T(S:Function unknown)	AFK46137.1(unknown [Lotus japonicus])
Glyur000287s00022150	-4.29089	7.02e-18	1.7e-15	yes	down	5.93333	0.21	10.44	4.65	2.71	0.21	0.18	0.24	Glyur000287s00022150					ENOG410Z9HT(S:Function unknown); ENOG410ZG4Y(S:Function unknown)	XP_019453882.1(PREDICTED: low-temperature-induced 78 kDa protein-like isoform X3 [Lupinus angustifolius])	sp|Q04980|LTI65_ARATH(Low-temperature-induced 65 kDa protein OS=Arabidopsis thaliana OX=3702 GN=LTI65 PE=2 SV=2)	PF07918.8(CAP160:CAP160 repeat)
Glyur001269s00036687	3.72563	9.75e-18	2.29e-15	yes	up	2.26333	22.8867	1.65	3.09	2.05	29.32	22.55	16.79	Glyur001269s00036687	GO:0008836(molecular_function:diaminopimelate decarboxylase activity); GO:0009089(biological_process:lysine biosynthetic process via diaminopimelate)	K01586	lysA	map00300(Lysine biosynthesis)	COG0019(S:Function unknown)	XP_014621009.1(PREDICTED: diaminopimelate decarboxylase 1, chloroplastic-like isoform X1 [Glycine max])	sp|Q94A94|DCDA2_ARATH(Diaminopimelate decarboxylase 2, chloroplastic OS=Arabidopsis thaliana OX=3702 GN=LYSA2 PE=1 SV=1)	PF02784.13(Orn_Arg_deC_N:Pyridoxal-dependent decarboxylase, pyridoxal binding domain); PF00278.19(Orn_DAP_Arg_deC:Pyridoxal-dependent decarboxylase, C-terminal sheet domain); PF01168.17(Ala_racemase_N:Alanine racemase, N-terminal domain)
Glyur000578s00021013	2.75243	9.74e-18	2.29e-15	yes	up	7.80667	39.4	6.22	6.21	10.99	33.72	37.48	47	Glyur000578s00021013		K13266	PTR	map00943(Isoflavonoid biosynthesis)	ENOG410Y0DY(S:Function unknown); ENOG410YDV6(S:Function unknown); ENOG411028Q(S:Function unknown)	BAF34841.1(pterocarpan reductase [Lotus japonicus])	sp|B9HRL7|PCBER_POPTR(Isoflavone reductase homolog PCBER OS=Populus trichocarpa OX=3694 GN=PCBER PE=1 SV=1)	PF05368.10(NmrA:NmrA-like family); PF13460.3(NAD_binding_10:NAD(P)H-binding); PF01370.18(Epimerase:NAD dependent epimerase/dehydratase family); PF01073.16(3Beta_HSD:3-beta hydroxysteroid dehydrogenase/isomerase family); PF16363.2(GDP_Man_Dehyd:GDP-mannose 4,6 dehydratase); PF08659.7(KR:KR domain)
Glyur002551s00039352	3.20809	9.55e-18	2.29e-15	yes	up	15.92	112.57	12.3	17.27	18.19	83.25	89.72	164.74	Glyur002551s00039352					ENOG4111D22(S:Function unknown); ENOG410YPS7(S:Function unknown)	NP_001237531.1(putative plantacyanin precursor [Glycine max])	sp|P00303|BABL_CUCSA(Basic blue protein OS=Cucumis sativus OX=3659 PE=1 SV=1)	PF02298.14(Cu_bind_like:Plastocyanin-like domain)
Glyur000314s00018005	4.84304	1.55e-17	3.6e-15	yes	up	0.606667	13.0933	0.71	0.89	0.22	16.68	12.97	9.63	Glyur000314s00018005	GO:0006949(biological_process:syncytium formation); GO:0005576(cellular_component:extracellular region); GO:0019953(biological_process:sexual reproduction); GO:0009506(cellular_component:plasmodesma)	K20628	exlX		ENOG410YA5Q(G:Carbohydrate transport and metabolism)	XP_020235471.1(expansin-B3 [Cajanus cajan])	sp|Q9M0I2|EXPB3_ARATH(Expansin-B3 OS=Arabidopsis thaliana OX=3702 GN=EXPB3 PE=2 SV=2)	PF01357.18(Pollen_allerg_1:Pollen allergen); PF03330.15(DPBB_1:Lytic transglycolase)
Glyur000051s00003417	3.69196	1.87e-17	4.31e-15	yes	up	0.673333	6.52	0.97	0.52	0.53	4.54	5.46	9.56	Glyur000051s00003417	GO:0003824(molecular_function:catalytic activity); GO:0016021(cellular_component:integral component of membrane); GO:0016207(molecular_function:4-coumarate-CoA ligase activity); GO:0008152(biological_process:metabolic process); GO:0016874(molecular_function:ligase activity)	K01904	4CL	map00130(Ubiquinone and other terpenoid-quinone biosynthesis); map00940(Phenylpropanoid biosynthesis); map00360(Phenylalanine metabolism)	COG0318(M:Cell wall/membrane/envelope biogenesis)	AGW16013.1(4-coumarate:coenzyme A ligase 1 [Pueraria montana var. lobata])	sp|P31687|4CL2_SOYBN(4-coumarate--CoA ligase 2 OS=Glycine max OX=3847 PE=2 SV=2)	PF00501.25(AMP-binding:AMP-binding enzyme); PF13193.3(AMP-binding_C:AMP-binding enzyme C-terminal domain)
Glyur001767s00042095	2.98699	2.29e-17	5.2e-15	yes	up	4.63333	26.92	5.55	4.61	3.74	24.35	21.65	34.76	Glyur001767s00042095	GO:0003824(molecular_function:catalytic activity)	K01792	E5.1.3.15	map00010(Glycolysis / Gluconeogenesis)	COG0676(G:Carbohydrate transport and metabolism)	XP_020229326.1(putative glucose-6-phosphate 1-epimerase isoform X2 [Cajanus cajan])	sp|Q40784|AAPC_CENCI(Putative glucose-6-phosphate 1-epimerase OS=Cenchrus ciliaris OX=35872 PE=2 SV=1)	PF01263.17(Aldose_epim:Aldose 1-epimerase)
Glyur000357s00018135	3.64273	2.54e-17	5.72e-15	yes	up	2.86667	34.72	2.05	4.62	1.93	38.57	33.89	31.7	Glyur000357s00018135	GO:0003824(molecular_function:catalytic activity); GO:0009116(biological_process:nucleoside metabolic process)				COG0775(F:Nucleotide transport and metabolism)	OAY78351.1(Bark storage protein A [Ananas comosus])	sp|Q07469|BSPA_POPDE(Bark storage protein A OS=Populus deltoides OX=3696 GN=BSPA PE=2 SV=1)	PF01048.17(PNP_UDP_1:Phosphorylase superfamily)
Glyur000440s00021860	2.78403	2.64e-17	5.9e-15	yes	up	3.48	18.4767	2.87	3.66	3.91	15.58	15.66	24.19	Glyur000440s00021860	GO:0016021(cellular_component:integral component of membrane)				ENOG410ZJIP(S:Function unknown)	XP_014625482.1(PREDICTED: protein trichome birefringence-like 33 [Glycine max])	sp|F4IH21|TBL33_ARATH(Protein trichome birefringence-like 33 OS=Arabidopsis thaliana OX=3702 GN=TBL33 PE=2 SV=1)	PF13839.3(PC-Esterase:GDSL/SGNH-like Acyl-Esterase family found in Pmr5 and Cas1p); PF14416.3(PMR5N:PMR5 N terminal Domain)
Glyur000432s00027008	-2.1105	4.04e-17	8.91e-15	yes	down	25.8833	4.52667	32.88	24.24	20.53	3.57	5.42	4.59	Glyur000432s00027008					ENOG410YDYN(K:Transcription); ENOG410YWTN(K:Transcription)	XP_003519049.1(PREDICTED: transcription factor bHLH130-like [Glycine max])	sp|Q66GR3|BH130_ARATH(Transcription factor bHLH130 OS=Arabidopsis thaliana OX=3702 GN=BHLH130 PE=1 SV=1)	PF00010.23(HLH:Helix-loop-helix DNA-binding domain)
Glyur007318s00045760	5.71483	5.62e-17	1.23e-14	yes	up	0.716667	28.8833	0.09	0.56	1.5	22.11	24.93	39.61	Glyur007318s00045760	GO:0042546(biological_process:cell wall biogenesis); GO:0005618(cellular_component:cell wall); GO:0048046(cellular_component:apoplast); GO:0071555(biological_process:cell wall organization); GO:0016762(molecular_function:xyloglucan:xyloglucosyl transferase activity); GO:0004553(molecular_function:hydrolase activity, hydrolyzing O-glycosyl compounds); GO:0010411(biological_process:xyloglucan metab…	K08235	E2.4.1.207		ENOG4110JM4(G:Carbohydrate transport and metabolism)	XP_003624548.1(xyloglucan endotransglucosylase/hydrolase 1 [Medicago truncatula])	sp|Q39857|XTH1_SOYBN(Xyloglucan endotransglucosylase/hydrolase 1 OS=Glycine max OX=3847 GN=XTH1 PE=2 SV=2)	PF00722.18(Glyco_hydro_16:Glycosyl hydrolases family 16); PF06955.9(XET_C:Xyloglucan endo-transglycosylase (XET) C-terminus)
Glyur000500s00018152	2.49088	6.2e-17	1.34e-14	yes	up	2.02	8.57	2.44	2.19	1.43	7.42	8.44	9.85	Glyur000500s00018152	GO:0000155(molecular_function:phosphorelay sensor kinase activity); GO:0016021(cellular_component:integral component of membrane); GO:0005622(cellular_component:intracellular); GO:0023014(biological_process:signal transduction by protein phosphorylation); GO:0000160(biological_process:phosphorelay signal transduction system)	K14489	AHK2_3_4	map04075(Plant hormone signal transduction)	COG0642(S:Function unknown); ENOG410ZW4C(T:Signal transduction mechanisms)	XP_003530935.1(PREDICTED: histidine kinase 4-like [Glycine max])	sp|Q9C5U0|AHK4_ARATH(Histidine kinase 4 OS=Arabidopsis thaliana OX=3702 GN=AHK4 PE=1 SV=1)	PF03924.10(CHASE:CHASE domain); PF02518.23(HATPase_c:Histidine kinase-, DNA gyrase B-, and HSP90-like ATPase); PF00072.21(Response_reg:Response regulator receiver domain); PF00512.22(HisKA:His Kinase A (phospho-acceptor) domain)
Glyur000210s00014432	6.82092	9.06e-17	1.94e-14	yes	up	0.666667	57.2167	0.65	1.19	0.16	101.1	56.76	13.79	Glyur000210s00014432	GO:0016787(molecular_function:hydrolase activity); GO:0006629(biological_process:lipid metabolic process)				COG3675(S:Function unknown); ENOG410XP1I(S:Function unknown); ENOG4111RPC(S:Function unknown)	XP_012569371.1(PREDICTED: phospholipase A1-Igamma2, chloroplastic-like isoform X3 [Cicer arietinum])	sp|Q3EBR6|PLA16_ARATH(Phospholipase A1-Igamma2, chloroplastic OS=Arabidopsis thaliana OX=3702 GN=At2g30550 PE=1 SV=2)	PF01764.22(Lipase_3:Lipase (class 3))
Glyur000174s00018477	10.3331	1e-16	2.13e-14	yes	up	0	8.72	0	0	0	9.78	8.09	8.29	Glyur000174s00018477	GO:0003824(molecular_function:catalytic activity); GO:0016829(molecular_function:lyase activity); GO:0005975(biological_process:carbohydrate metabolic process); GO:0030246(molecular_function:carbohydrate binding)	K18195	RGL4, rhiE		ENOG410YE12(S:Function unknown)	XP_004490462.1(PREDICTED: probable rhamnogalacturonate lyase C [Cicer arietinum])	sp|Q8RJP2|RHIE_DICD3(Rhamnogalacturonate lyase OS=Dickeya dadantii (strain 3937) OX=198628 GN=rhiE PE=1 SV=1)	PF06045.8(Rhamnogal_lyase:Rhamnogalacturonate lyase family); PF14683.3(CBM-like:Polysaccharide lyase family 4, domain III); PF14686.3(fn3_3:Polysaccharide lyase family 4, domain II); PF13620.3(CarboxypepD_reg:Carboxypeptidase regulatory-like domain)
Glyur000099s00014956	7.55783	1.02e-16	2.14e-14	yes	up	0.0466667	5.07333	0	0.1	0.04	4.72	4.96	5.54	Glyur000099s00014956	GO:0003849(molecular_function:3-deoxy-7-phosphoheptulonate synthase activity); GO:0009073(biological_process:aromatic amino acid family biosynthetic process)	K01626	E2.5.1.54, aroF, aroG, aroH	map00400(Phenylalanine, tyrosine and tryptophan biosynthesis); map02024(Quorum sensing)	COG3200(S:Function unknown)	XP_016181231.1(phospho-2-dehydro-3-deoxyheptonate aldolase 1, chloroplastic [Arachis ipaensis])	sp|P27608|AROF_TOBAC(Phospho-2-dehydro-3-deoxyheptonate aldolase 1, chloroplastic OS=Nicotiana tabacum OX=4097 GN=DHAPS-1 PE=2 SV=1)	PF01474.13(DAHP_synth_2:Class-II DAHP synthetase family)
Glyur001700s00031781	3.71474	1.04e-16	2.15e-14	yes	up	1.53333	15.1967	1.79	1.27	1.54	8.31	14.03	23.25	Glyur001700s00031781	GO:0071704(biological_process:organic substance metabolic process); GO:0005576(cellular_component:extracellular region); GO:0008061(molecular_function:chitin binding); GO:0004553(molecular_function:hydrolase activity, hydrolyzing O-glycosyl compounds); GO:0004568(molecular_function:chitinase activity); GO:0006032(biological_process:chitin catabolic process)	K01183	E3.2.1.14	map00520(Amino sugar and nucleotide sugar metabolism)	COG3325(G:Carbohydrate transport and metabolism)	XP_019463750.1(PREDICTED: chitotriosidase-1-like [Lupinus angustifolius])	sp|O81862|CHIC_ARATH(Class V chitinase OS=Arabidopsis thaliana OX=3702 GN=ChiC PE=1 SV=1)	PF00704.25(Glyco_hydro_18:Glycosyl hydrolases family 18)
Glyur001653s00028824	2.49305	1.03e-16	2.15e-14	yes	up	4.15	17.6167	3.64	3.15	5.66	14.73	17.03	21.09	Glyur001653s00028824	GO:0003824(molecular_function:catalytic activity); GO:0008661(molecular_function:1-deoxy-D-xylulose-5-phosphate synthase activity); GO:0016114(biological_process:terpenoid biosynthetic process); GO:0008152(biological_process:metabolic process)	K01662	dxs	map00730(Thiamine metabolism); map00900(Terpenoid backbone biosynthesis)	COG1154(H:Coenzyme transport and metabolism)	XP_003530591.1(PREDICTED: probable 1-deoxy-D-xylulose-5-phosphate synthase 2, chloroplastic [Glycine max])	sp|Q6YU51|DXS2_ORYSJ(Probable 1-deoxy-D-xylulose-5-phosphate synthase 2, chloroplastic OS=Oryza sativa subsp. japonica OX=39947 GN=Os07g0190000 PE=2 SV=1)	PF13292.3(DXP_synthase_N:1-deoxy-D-xylulose-5-phosphate synthase); PF02780.17(Transketolase_C:Transketolase, C-terminal domain); PF02779.21(Transket_pyr:Transketolase, pyrimidine binding domain)
Glyur004161s00039872	6.41	1.29e-16	2.63e-14	yes	up	3.52	240.293	0.64	7.81	2.11	304.63	210.64	205.61	Glyur004161s00039872	GO:0016311(biological_process:dephosphorylation); GO:0046872(molecular_function:metal ion binding); GO:0003993(molecular_function:acid phosphatase activity)				COG1409(S:Function unknown)	KEH34963.1(inactive purple acid phosphatase-like protein [Medicago truncatula])	sp|Q687E1|NPP_HORVU(Nucleotide pyrophosphatase/phosphodiesterase (Fragments) OS=Hordeum vulgare OX=4513 GN=npp PE=1 SV=2)	PF00149.25(Metallophos:Calcineurin-like phosphoesterase)
Glyur000539s00030597	7.45916	1.53e-16	3.1e-14	yes	up	0.13	18.1733	0.09	0.17	0.13	3.66	11.78	39.08	Glyur000539s00030597	GO:0050661(molecular_function:NADP binding); GO:0050660(molecular_function:flavin adenine dinucleotide binding); GO:0004499(molecular_function:N,N-dimethylaniline monooxygenase activity); GO:0055114(biological_process:oxidation-reduction process)	K00485	FMO	map00982(Drug metabolism - cytochrome P450)	COG2072(P:Inorganic ion transport and metabolism)	GAU44719.1(hypothetical protein TSUD_400310 [Trifolium subterraneum])	sp|Q9LMA1|FMO1_ARATH(Probable flavin-containing monooxygenase 1 OS=Arabidopsis thaliana OX=3702 GN=FMO1 PE=2 SV=1)	PF00743.16(FMO-like:Flavin-binding monooxygenase-like); PF13738.3(Pyr_redox_3:Pyridine nucleotide-disulphide oxidoreductase); PF07992.11(Pyr_redox_2:Pyridine nucleotide-disulphide oxidoreductase); PF13434.3(K_oxygenase:L-lysine 6-monooxygenase (NADPH-requiring)); PF13450.3(NAD_binding_8:NAD(P)-binding Rossmann-like domain)
Glyur002317s00041400	4.69492	1.57e-16	3.14e-14	yes	up	0.486667	7.01	0.24	0.49	0.73	6.57	6.44	8.02	Glyur002317s00041400
Glyur000261s00014343	1.8946	1.72e-16	3.42e-14	yes	up	22.37	62.4167	22.11	22.93	22.07	66.75	58.74	61.76	Glyur000261s00014343	GO:0005737(cellular_component:cytoplasm); GO:0008441(molecular_function:3'(2'),5'-bisphosphate nucleotidase activity); GO:0016311(biological_process:dephosphorylation); GO:0000287(molecular_function:magnesium ion binding); GO:0006790(biological_process:sulfur compound metabolic process); GO:0046854(biological_process:phosphatidylinositol phosphorylation)	K15422	SAL	map04070(Phosphatidylinositol signaling system); map00920(Sulfur metabolism); map00562(Inositol phosphate metabolism)	COG1218(S:Function unknown)	XP_004504666.1(PREDICTED: SAL1 phosphatase-like [Cicer arietinum])	sp|Q42546|DPNP1_ARATH(SAL1 phosphatase OS=Arabidopsis thaliana OX=3702 GN=SAL1 PE=1 SV=1)	PF00459.22(Inositol_P:Inositol monophosphatase family)
Glyur000125s00010035	5.40593	1.91e-16	3.77e-14	yes	up	2.30667	73.7833	1.22	3.29	2.41	131.58	62.29	27.48	Glyur000125s00010035	GO:0046983(molecular_function:protein dimerization activity); GO:0008171(molecular_function:O-methyltransferase activity); GO:0032259(biological_process:methylation)				ENOG410XS7T(S:Function unknown)	PNX63396.1(O-methyltransferase, partial [Trifolium pratense])	sp|Q9T003|ASMT_ARATH(Acetylserotonin O-methyltransferase OS=Arabidopsis thaliana OX=3702 GN=ASMT PE=1 SV=1)	PF00891.15(Methyltransf_2:O-methyltransferase)
Glyur005231s00047621	10.6929	1.96e-16	3.82e-14	yes	up	0	8.62333	0	0	0	12.89	6.77	6.21	Glyur005231s00047621	GO:0016021(cellular_component:integral component of membrane); GO:0016020(cellular_component:membrane); GO:0055085(biological_process:transmembrane transport)				ENOG41123EZ(S:Function unknown); ENOG410Y8WV(S:Function unknown)	XP_003590250.1(protein NUCLEAR FUSION DEFECTIVE 4 [Medicago truncatula])	sp|F4I9E1|NFD4_ARATH(Protein NUCLEAR FUSION DEFECTIVE 4 OS=Arabidopsis thaliana OX=3702 GN=NFD4 PE=3 SV=1)	PF06813.10(Nodulin-like:Nodulin-like)
Glyur001772s00032256	2.40935	2.13e-16	4.12e-14	yes	up	0.716667	2.84667	0.65	0.65	0.85	2.46	2.91	3.17	Glyur001772s00032256	GO:0016021(cellular_component:integral component of membrane); GO:0005622(cellular_component:intracellular); GO:0007264(biological_process:small GTPase mediated signal transduction); GO:0005525(molecular_function:GTP binding)				ENOG4111F3H(S:Function unknown); ENOG410ZBX3(S:Function unknown)	KHN43808.1(Protein NLRC3 [Glycine soja])	sp|Q9FJ57|TRN1_ARATH(Protein TORNADO 1 OS=Arabidopsis thaliana OX=3702 GN=TRN1 PE=2 SV=1)	PF16095.2(COR:C-terminal of Roc, COR, domain); PF13516.3(LRR_6:Leucine Rich repeat); PF08477.10(Roc:Ras of Complex, Roc, domain of DAPkinase); PF00025.18(Arf:ADP-ribosylation factor family)
Glyur000369s00020543	4.10848	2.98e-16	5.66e-14	yes	up	0.693333	9.26333	0.46	1.11	0.51	10.2	8.11	9.48	Glyur000369s00020543	GO:0006633(biological_process:fatty acid biosynthetic process); GO:0016021(cellular_component:integral component of membrane); GO:0016747(molecular_function:transferase activity, transferring acyl groups other than amino-acyl groups)	K15397	KCS	map00062(Fatty acid elongation)	ENOG410Y5VH(I:Lipid transport and metabolism)	XP_003626601.1(3-ketoacyl-CoA synthase 1 [Medicago truncatula])	sp|Q9MAM3|KCS1_ARATH(3-ketoacyl-CoA synthase 1 OS=Arabidopsis thaliana OX=3702 GN=KCS1 PE=1 SV=1)	PF08392.9(FAE1_CUT1_RppA:FAE1/Type III polyketide synthase-like protein); PF08541.7(ACP_syn_III_C:3-Oxoacyl-[acyl-carrier-protein (ACP)] synthase III C terminal); PF02797.12(Chal_sti_synt_C:Chalcone and stilbene synthases, C-terminal domain); PF00195.16(Chal_sti_synt_N:Chalcone and stilbene synthases, N-terminal domain)
Glyur002185s00036363	10.2196	2.96e-16	5.66e-14	yes	up	0	8.73	0	0	0	7.42	9.17	9.6	Glyur002185s00036363
Glyur000218s00011632	4.65102	3.06e-16	5.77e-14	yes	up	96.8133	1962.68	52.06	177.69	60.69	1961.99	1612.81	2313.23	Glyur000218s00011632
Glyur000467s00022312	-1.50775	3.33e-16	6.22e-14	yes	down	50.2133	13.3867	52.75	49.27	48.62	11.16	14.17	14.83	Glyur000467s00022312	GO:0006887(biological_process:exocytosis); GO:0000145(cellular_component:exocyst)	K07195	EXOC7, EXO70	map04910(Insulin signaling pathway)	ENOG410YIGI(T:Signal transduction mechanisms)	GAU33005.1(hypothetical protein TSUD_358720 [Trifolium subterraneum])	sp|Q9FGH9|E70B1_ARATH(Exocyst complex component EXO70B1 OS=Arabidopsis thaliana OX=3702 GN=EXO70B1 PE=1 SV=1)	PF03081.12(Exo70:Exo70 exocyst complex subunit)
Glyur000124s00011948	1.68289	3.72e-16	6.88e-14	yes	up	113.263	236.393	116.8	80.88	142.11	248.1	222.21	238.87	Glyur000124s00011948					ENOG410YKTH(S:Function unknown); ENOG41117UE(U:Intracellular trafficking, secretion, and vesicular transport); ENOG41105C5(S:Function unknown)	ACU14401.1(unknown [Glycine max])	sp|Q00451|PRF1_SOLLC(36.4 kDa proline-rich protein OS=Solanum lycopersicum OX=4081 GN=TPRP-F1 PE=2 SV=1)	PF14547.3(Hydrophob_seed:Hydrophobic seed protein); PF14368.3(LTP_2:Probable lipid transfer); PF00234.19(Tryp_alpha_amyl:Protease inhibitor/seed storage/LTP family)
Glyur000464s00022406	4.12208	4.52e-16	8.3e-14	yes	up	0.84	10.4933	1.36	0.57	0.59	12.59	9.34	9.55	Glyur000464s00022406	GO:0045492(biological_process:xylan biosynthetic process); GO:0016021(cellular_component:integral component of membrane)				ENOG410YAEW(S:Function unknown)	XP_013457440.1(protein IRX15-LIKE [Medicago truncatula])	sp|Q9FH92|IX15L_ARATH(Protein IRX15-LIKE OS=Arabidopsis thaliana OX=3702 GN=IRX15-L PE=2 SV=1)	PF04669.10(Polysacc_synt_4:Polysaccharide biosynthesis)
Glyur000089s00008779	1.94104	6.83e-16	1.24e-13	yes	up	14.9133	43.1567	13.34	13.64	17.76	40.94	42.18	46.35	Glyur000089s00008779	GO:0000413(biological_process:protein peptidyl-prolyl isomerization); GO:0006457(biological_process:protein folding); GO:0003755(molecular_function:peptidyl-prolyl cis-trans isomerase activity)	K01802	E5.2.1.8		COG0652(O:Posttranslational modification, protein turnover, chaperones)	XP_004500742.1(PREDICTED: peptidyl-prolyl cis-trans isomerase [Cicer arietinum])	sp|Q8W171|CYP1_SOYBN(Peptidyl-prolyl cis-trans isomerase 1 OS=Glycine max OX=3847 GN=Cyp1 PE=2 SV=1)
Glyur000652s00019420	3.59639	7.09e-16	1.28e-13	yes	up	8.23667	77.76	4.36	10.55	9.8	62.05	66.59	104.64	Glyur000652s00019420	GO:0009664(biological_process:plant-type cell wall organization); GO:0020037(molecular_function:heme binding); GO:0006979(biological_process:response to oxidative stress); GO:0098869(biological_process:cellular oxidant detoxification); GO:0042744(biological_process:hydrogen peroxide catabolic process); GO:0005576(cellular_component:extracellular region); GO:0046872(molecular_function:metal ion bi…	K00430	E1.11.1.7	map00940(Phenylpropanoid biosynthesis)	ENOG410Y9ME(G:Carbohydrate transport and metabolism)	XP_020204120.1(peroxidase 3-like isoform X2 [Cajanus cajan])	sp|O23044|PER3_ARATH(Peroxidase 3 OS=Arabidopsis thaliana OX=3702 GN=PER3 PE=2 SV=1)	PF00141.20(peroxidase:Peroxidase)
Glyur000179s00010711	3.28795	7.88e-16	1.41e-13	yes	up	1.50333	11.32	1.84	0.81	1.86	10.1	9.83	14.03	Glyur000179s00010711	GO:0016787(molecular_function:hydrolase activity); GO:0003824(molecular_function:catalytic activity)				ENOG410ZRHA(S:Function unknown); COG0596(S:Function unknown); ENOG410ZK11(S:Function unknown)	XP_020229553.1(epoxide hydrolase 4-like [Cajanus cajan])	sp|G5EBI4|CEEH1_CAEEL(Epoxide hydrolase 1 OS=Caenorhabditis elegans OX=6239 GN=ceeh-1 PE=1 SV=1)	PF00561.17(Abhydrolase_1:alpha/beta hydrolase fold); PF12697.4(Abhydrolase_6:Alpha/beta hydrolase family); PF12146.5(Hydrolase_4:Serine aminopeptidase, S33); PF05577.9(Peptidase_S28:Serine carboxypeptidase S28)
Glyur000063s00005860	2.91475	8.12e-16	1.44e-13	yes	up	2.28667	12.72	2.85	2.07	1.94	11.49	12.72	13.95	Glyur000063s00005860	GO:0005509(molecular_function:calcium ion binding)	K06268	PPP3R, CNB	map05166(Human T-cell leukemia virus 1 infection); map05167(Kaposi sarcoma-associated herpesvirus infection); map04650(Natural killer cell mediated cytotoxicity); map04114(Oocyte meiosis); map05163(Human cytomegalovirus infection); map04659(Th17 cell differentiation); map04658(Th1 and Th2 cell differentiation); map04010(MAPK signaling pathway); map04218(Cellular senescence); map04370(VEGF signali…	COG5126(S:Function unknown)	PNX71306.1(calcineurin subunit b-like protein [Trifolium pratense])	sp|P42322|CANB1_NAEGR(Calcineurin subunit B OS=Naegleria gruberi OX=5762 GN=CNB1 PE=3 SV=1)	PF13499.3(EF-hand_7:EF-hand domain pair); PF13405.3(EF-hand_6:EF-hand domain); PF00036.29(EF-hand_1:EF hand); PF14658.3(EF-hand_9:EF-hand domain); PF13833.3(EF-hand_8:EF-hand domain pair)
Glyur002185s00036361	10.196	8.2e-16	1.44e-13	yes	up	0	6.57333	0	0	0	6.43	4.9	8.39	Glyur002185s00036361					ENOG410XPC8(S:Function unknown)	XP_022730546.1(protein BONZAI 1-like isoform X1 [Durio zibethinus])	sp|Q5S1W2|BON2_ARATH(Protein BONZAI 2 OS=Arabidopsis thaliana OX=3702 GN=BON2 PE=1 SV=2)	PF07002.13(Copine:Copine)
Glyur000213s00016095	2.88365	1.05e-15	1.84e-13	yes	up	2.98333	16.1767	3.07	2.18	3.7	18.98	16.33	13.22	Glyur000213s00016095	GO:0005794(cellular_component:Golgi apparatus); GO:0000271(biological_process:polysaccharide biosynthetic process); GO:0016757(molecular_function:transferase activity, transferring glycosyl groups)	K20893	PARVUS, GLZ1, GATL1		ENOG41106K3(O:Posttranslational modification, protein turnover, chaperones)	XP_013466045.1(probable galacturonosyltransferase-like 1 [Medicago truncatula])	sp|Q9LN68|GATL1_ARATH(Probable galacturonosyltransferase-like 1 OS=Arabidopsis thaliana OX=3702 GN=GATL1 PE=2 SV=1)	PF01501.17(Glyco_transf_8:Glycosyl transferase family 8)
Glyur000037s00002618	4.90471	1.29e-15	2.24e-13	yes	up	7.72667	185.883	2.5	14.39	6.29	191.84	159.98	205.83	Glyur000037s00002618	GO:0004420(molecular_function:hydroxymethylglutaryl-CoA reductase (NADPH) activity); GO:0016126(biological_process:sterol biosynthetic process); GO:0050661(molecular_function:NADP binding); GO:0005778(cellular_component:peroxisomal membrane); GO:0015936(biological_process:coenzyme A metabolic process); GO:0016021(cellular_component:integral component of membrane); GO:0005789(cellular_component:en…	K00021	HMGCR	map04976(Bile secretion); map04152(AMPK signaling pathway); map00900(Terpenoid backbone biosynthesis)	COG1257(I:Lipid transport and metabolism)	XP_004512291.1(PREDICTED: 3-hydroxy-3-methylglutaryl-coenzyme A reductase 1-like [Cicer arietinum])	sp|P29057|HMDH1_HEVBR(3-hydroxy-3-methylglutaryl-coenzyme A reductase 1 OS=Hevea brasiliensis OX=3981 GN=HMGR1 PE=2 SV=1)	PF00368.15(HMG-CoA_red:Hydroxymethylglutaryl-coenzyme A reductase)
Glyur000772s00033983	2.76818	1.65e-15	2.84e-13	yes	up	6.95667	36.3033	5.75	9.05	6.07	40.06	36.77	32.08	Glyur000772s00033983	GO:0008168(molecular_function:methyltransferase activity)	K13066	E2.1.1.68, COMT	map00940(Phenylpropanoid biosynthesis)	ENOG410XS7T(K:Transcription)	PNY01373.1(caffeic acid 3-O-methyltransferase-like protein [Trifolium pratense])	sp|A9X7L0|ANMT_RUTGR(Anthranilate N-methyltransferase OS=Ruta graveolens OX=37565 PE=1 SV=1)	PF00891.15(Methyltransf_2:O-methyltransferase); PF08100.8(Dimerisation:Dimerisation domain); PF16864.2(Dimerisation2:Dimerisation domain)
Glyur001572s00035822	5.28029	1.69e-15	2.88e-13	yes	up	0.0866667	2.41	0.11	0.08	0.07	2.53	2.18	2.52	Glyur001572s00035822	GO:0016722(molecular_function:oxidoreductase activity, oxidizing metal ions); GO:0052716(molecular_function:hydroquinone:oxygen oxidoreductase activity); GO:0009809(biological_process:lignin biosynthetic process); GO:0048046(cellular_component:apoplast); GO:0046274(biological_process:lignin catabolic process); GO:0005507(molecular_function:copper ion binding); GO:0055114(biological_process:oxidat…	K05909	E1.10.3.2		COG2132(V:Defense mechanisms)	XP_017417408.1(PREDICTED: laccase-4 [Vigna angularis])	sp|O80434|LAC4_ARATH(Laccase-4 OS=Arabidopsis thaliana OX=3702 GN=IRX12 PE=2 SV=2)	PF00394.19(Cu-oxidase:Multicopper oxidase); PF07731.11(Cu-oxidase_2:Multicopper oxidase); PF07732.12(Cu-oxidase_3:Multicopper oxidase)
Glyur000867s00025581	2.75066	2.12e-15	3.58e-13	yes	up	38.79	194.377	30.91	42.29	43.17	246.9	188.2	148.03	Glyur000867s00025581					ENOG410YRBB(S:Function unknown); ENOG41116YB(S:Function unknown)	XP_004506291.1(PREDICTED: uncharacterized protein LOC101503975 [Cicer arietinum])	sp|Q6NPM5|ATS3B_ARATH(Embryo-specific protein ATS3B OS=Arabidopsis thaliana OX=3702 GN=ATS3B PE=1 SV=1)	PF06232.8(ATS3:Embryo-specific protein 3, (ATS3)); PF01477.20(PLAT:PLAT/LH2 domain)
Glyur000390s00023106	3.5141	2.24e-15	3.77e-13	yes	up	1.06333	9.16667	0.61	1.07	1.51	7.76	9.23	10.51	Glyur000390s00023106	GO:0051213(molecular_function:dioxygenase activity)				COG3491(S:Function unknown)	XP_004507291.1(PREDICTED: hyoscyamine 6-dioxygenase-like [Cicer arietinum])	sp|Q9FLV0|DMR6_ARATH(Protein DOWNY MILDEW RESISTANCE 6 OS=Arabidopsis thaliana OX=3702 GN=DMR6 PE=1 SV=1)	PF14226.3(DIOX_N:non-haem dioxygenase in morphine synthesis N-terminal)
Glyur001200s00029486	2.28396	2.82e-15	4.7e-13	yes	up	13.5933	50.1167	13.79	15.77	11.22	51.42	43.99	54.94	Glyur001200s00029486	GO:0051603(biological_process:proteolysis involved in cellular protein catabolic process); GO:0019748(biological_process:secondary metabolic process); GO:0004185(molecular_function:serine-type carboxypeptidase activity); GO:0016746(molecular_function:transferase activity, transferring acyl groups); GO:0016747(molecular_function:transferase activity, transferring acyl groups other than amino-acyl …	K09756;K16296	SCPL19, SNG2;SCPL-I	map00940(Phenylpropanoid biosynthesis)	COG2939(E:Amino acid transport and metabolism)	XP_012572932.1(PREDICTED: serine carboxypeptidase-like 13 [Cicer arietinum])	sp|O64811|SCP9_ARATH(Serine carboxypeptidase-like 9 OS=Arabidopsis thaliana OX=3702 GN=SCPL9 PE=2 SV=1)	PF00450.19(Peptidase_S10:Serine carboxypeptidase)
Glyur002391s00040854	2.69461	3.02e-15	4.97e-13	yes	up	20.1833	100.757	13.94	25.27	21.34	96.74	95.33	110.2	Glyur002391s00040854	GO:0003849(molecular_function:3-deoxy-7-phosphoheptulonate synthase activity); GO:0009073(biological_process:aromatic amino acid family biosynthetic process)	K01626	E2.5.1.54, aroF, aroG, aroH	map00400(Phenylalanine, tyrosine and tryptophan biosynthesis); map02024(Quorum sensing)	COG3200(E:Amino acid transport and metabolism)	PNY11527.1(phospho-2-dehydro-3-deoxyheptonate aldolase [Trifolium pratense])	sp|P27608|AROF_TOBAC(Phospho-2-dehydro-3-deoxyheptonate aldolase 1, chloroplastic OS=Nicotiana tabacum OX=4097 GN=DHAPS-1 PE=2 SV=1)	PF01474.13(DAHP_synth_2:Class-II DAHP synthetase family)
Glyur002188s00037691	3.24164	3.02e-15	4.97e-13	yes	up	9.35667	63.2667	16.1	6.41	5.56	58.48	58.41	72.91	Glyur002188s00037691	GO:0016020(cellular_component:membrane); GO:0008289(molecular_function:lipid binding); GO:0006869(biological_process:lipid transport)				ENOG410Z3NP(U:Intracellular trafficking, secretion, and vesicular transport)	XP_003615638.1(non-specific lipid-transfer protein-like protein At5g64080 [Medicago truncatula])	sp|Q8VYI9|NLTL5_ARATH(Non-specific lipid-transfer protein-like protein At5g64080 OS=Arabidopsis thaliana OX=3702 GN=At5g64080 PE=1 SV=1)	PF14368.3(LTP_2:Probable lipid transfer); PF00234.19(Tryp_alpha_amyl:Protease inhibitor/seed storage/LTP family)
Glyur000321s00019396	1.651	3.72e-15	6.06e-13	yes	up	10.08	24.0133	9.47	9.8	10.97	21.5	23.85	26.69	Glyur000321s00019396	GO:0016722(molecular_function:oxidoreductase activity, oxidizing metal ions); GO:0016021(cellular_component:integral component of membrane); GO:0046658(cellular_component:anchored component of plasma membrane); GO:0009506(cellular_component:plasmodesma); GO:0005507(molecular_function:copper ion binding); GO:0009505(cellular_component:plant-type cell wall); GO:0055114(biological_process:oxidation-…				COG2132(K:Transcription)	XP_020226538.1(monocopper oxidase-like protein SKU5 [Cajanus cajan])	sp|Q9SU40|SKU5_ARATH(Monocopper oxidase-like protein SKU5 OS=Arabidopsis thaliana OX=3702 GN=SKU5 PE=1 SV=1)	PF07732.12(Cu-oxidase_3:Multicopper oxidase); PF00394.19(Cu-oxidase:Multicopper oxidase); PF07731.11(Cu-oxidase_2:Multicopper oxidase)
Glyur000259s00016742	3.23709	3.76e-15	6.09e-13	yes	up	2.30667	16.5067	3.28	2.36	1.28	12.27	14.86	22.39	Glyur000259s00016742	GO:0046658(cellular_component:anchored component of plasma membrane); GO:0030247(molecular_function:polysaccharide binding); GO:0005975(biological_process:carbohydrate metabolic process); GO:0004553(molecular_function:hydrolase activity, hydrolyzing O-glycosyl compounds)				ENOG410Y94B(G:Carbohydrate transport and metabolism)	XP_020202597.1(glucan endo-1,3-beta-glucosidase 12-like [Cajanus cajan])	sp|Q8VYE5|E1312_ARATH(Glucan endo-1,3-beta-glucosidase 12 OS=Arabidopsis thaliana OX=3702 GN=At4g29360 PE=1 SV=1)	PF00332.15(Glyco_hydro_17:Glycosyl hydrolases family 17); PF07983.10(X8:X8 domain)
Glyur000067s00006351	4.39298	4.22e-15	6.78e-13	yes	up	0.71	11.1	0.64	0.86	0.63	17.14	10.27	5.89	Glyur000067s00006351	GO:0016787(molecular_function:hydrolase activity); GO:0006629(biological_process:lipid metabolic process)				ENOG4111RPC(S:Function unknown); COG3675(S:Function unknown)	XP_003524096.1(PREDICTED: phospholipase A1-Ibeta2, chloroplastic-like [Glycine max])	sp|O23522|PLA14_ARATH(Phospholipase A1-Ibeta2, chloroplastic OS=Arabidopsis thaliana OX=3702 GN=At4g16820 PE=1 SV=2)	PF01764.22(Lipase_3:Lipase (class 3)); PF11187.5(DUF2974:Protein of unknown function (DUF2974))
Glyur000012s00000586	3.84924	5.03e-15	8.02e-13	yes	up	0.506667	5.33667	0.6	0.25	0.67	6.3	5.85	3.86	Glyur000012s00000586	GO:0004674(molecular_function:protein serine/threonine kinase activity); GO:0006468(biological_process:protein phosphorylation); GO:0016021(cellular_component:integral component of membrane); GO:0005524(molecular_function:ATP binding)				COG0515(T:Signal transduction mechanisms)	XP_014506943.1(probable receptor-like protein kinase At5g18500 [Vigna radiata var. radiata])	sp|Q8LEB6|Y5185_ARATH(Probable receptor-like protein kinase At5g18500 OS=Arabidopsis thaliana OX=3702 GN=At5g18500 PE=2 SV=1)	PF00069.22(Pkinase:Protein kinase domain); PF07714.14(Pkinase_Tyr:Protein tyrosine kinase)
Glyur000361s00013162	6.32448	5.11e-15	8.09e-13	yes	up	77.5133	164.55	57.5	76.83	98.21	192.13	170.89	130.63	Glyur000361s00013162	GO:0016311(biological_process:dephosphorylation); GO:0046872(molecular_function:metal ion binding); GO:0003993(molecular_function:acid phosphatase activity)				COG1409(S:Function unknown)	XP_020213337.1(nucleotide pyrophosphatase/phosphodiesterase-like [Cajanus cajan])	sp|Q5MAU8|PPA27_ARATH(Probable inactive purple acid phosphatase 27 OS=Arabidopsis thaliana OX=3702 GN=PAP27 PE=2 SV=1)	PF00149.25(Metallophos:Calcineurin-like phosphoesterase); PF14008.3(Metallophos_C:Iron/zinc purple acid phosphatase-like protein C); PF16656.2(Pur_ac_phosph_N:Purple acid Phosphatase, N-terminal domain)
Glyur000002s00000356	2.59237	8.62e-15	1.36e-12	yes	up	21.81	99.3	16.38	25.94	23.11	113.98	94.09	89.83	Glyur000002s00000356	GO:0016787(molecular_function:hydrolase activity); GO:0016021(cellular_component:integral component of membrane); GO:0009536(cellular_component:plastid)				COG0491(S:Function unknown)	XP_003592628.2(uncharacterized protein LOC11421877 isoform X1 [Medicago truncatula])	sp|Q0V9A9|LACB2_XENTR(Endoribonuclease LACTB2 OS=Xenopus tropicalis OX=8364 GN=lactb2 PE=2 SV=1)	PF12706.4(Lactamase_B_2:Beta-lactamase superfamily domain); PF00753.24(Lactamase_B:Metallo-beta-lactamase superfamily)
Glyur001780s00035671	-1.43437	8.88e-15	1.39e-12	yes	down	23.4633	6.47	28.61	19.17	22.61	5.84	7.47	6.1	Glyur001780s00035671		K09419	HSFF		COG5169(K:Transcription)	AGJ83756.1(heat stress transcription factor A-4a-like protein [Caragana korshinskii])	sp|O49403|HFA4A_ARATH(Heat stress transcription factor A-4a OS=Arabidopsis thaliana OX=3702 GN=HSFA4A PE=2 SV=1)	PF00447.14(HSF_DNA-bind:HSF-type DNA-binding)
Glyur000013s00003259	-1.25564	9.03e-15	1.4e-12	yes	down	549.04	171.38	667.09	416.78	563.25	146.6	193.88	173.66	Glyur000013s00003259	GO:0003676(molecular_function:nucleic acid binding)				ENOG410ZICF(S:Function unknown); ENOG410ZJS2(S:Function unknown)	NP_001348440.1(R3H and SUZ domain-containing protein [Glycine max])		PF01424.19(R3H:R3H domain); PF12752.4(SUZ:SUZ domain)
Glyur000841s00026261	9.74839	9.7e-15	1.49e-12	yes	up	0	4.64333	0	0	0	5.1	3.81	5.02	Glyur000841s00026261	GO:0016853(molecular_function:isomerase activity); GO:0030604(molecular_function:1-deoxy-D-xylulose-5-phosphate reductoisomerase activity); GO:0008299(biological_process:isoprenoid biosynthetic process); GO:0070402(molecular_function:NADPH binding); GO:0046872(molecular_function:metal ion binding); GO:0055114(biological_process:oxidation-reduction process)	K00099	dxr	map00900(Terpenoid backbone biosynthesis)	COG0743(I:Lipid transport and metabolism)	XP_004510245.1(PREDICTED: 1-deoxy-D-xylulose 5-phosphate reductoisomerase, chloroplastic-like [Cicer arietinum])	sp|Q8W250|DXR_ORYSJ(1-deoxy-D-xylulose 5-phosphate reductoisomerase, chloroplastic OS=Oryza sativa subsp. japonica OX=39947 GN=DXR PE=2 SV=2)	PF02670.13(DXP_reductoisom:1-deoxy-D-xylulose 5-phosphate reductoisomerase); PF13288.3(DXPR_C:DXP reductoisomerase C-terminal domain); PF08436.9(DXP_redisom_C:1-deoxy-D-xylulose 5-phosphate reductoisomerase C-terminal)
Glyur000112s00012308	1.4507	1.08e-14	1.65e-12	yes	up	138.337	273.78	145.76	130.73	138.52	267.75	251.34	302.25	Glyur000112s00012308					COG5038(S:Function unknown)	PNX99826.1(putative ADP-ribosylation factor GTPase-activating protein [Trifolium pratense])	sp|Q9S7J9|CAR9_ARATH(Protein C2-DOMAIN ABA-RELATED 9 OS=Arabidopsis thaliana OX=3702 GN=CAR9 PE=2 SV=1)	PF00168.27(C2:C2 domain)
Glyur002006s00031341	3.13541	1.17e-14	1.77e-12	yes	up	1.93333	12.6967	2.74	1.73	1.33	9.12	11.15	17.82	Glyur002006s00031341	GO:0046658(cellular_component:anchored component of plasma membrane); GO:0030247(molecular_function:polysaccharide binding); GO:0005975(biological_process:carbohydrate metabolic process); GO:0004553(molecular_function:hydrolase activity, hydrolyzing O-glycosyl compounds)				ENOG410Y94B(S:Function unknown)	XP_004502047.1(PREDICTED: glucan endo-1,3-beta-glucosidase 11 [Cicer arietinum])	sp|Q8L868|E1311_ARATH(Glucan endo-1,3-beta-glucosidase 11 OS=Arabidopsis thaliana OX=3702 GN=At1g32860 PE=1 SV=1)	PF00332.15(Glyco_hydro_17:Glycosyl hydrolases family 17)
Glyur000119s00012164	10.3475	1.28e-14	1.93e-12	yes	up	0	51.9633	0	0	0	76.89	51.8	27.2	Glyur000119s00012164
Glyur002165s00032072	2.87116	1.3e-14	1.94e-12	yes	up	0.906667	4.79667	0.88	0.8	1.04	5.14	4.62	4.63	Glyur002165s00032072	GO:0005488(molecular_function:binding); GO:0000166(molecular_function:nucleotide binding)	K10405	KIFC1		COG5059(Z:Cytoskeleton)	XP_018848351.1(PREDICTED: kinesin-1-like isoform X2 [Juglans regia])	sp|Q07970|KN14C_ARATH(Kinesin-like protein KIN-14C OS=Arabidopsis thaliana OX=3702 GN=KIN14C PE=2 SV=1)	PF00225.20(Kinesin:Kinesin motor domain); PF16796.2(Microtub_bd:Microtubule binding)
Glyur000462s00025048	10.5517	1.31e-14	1.95e-12	yes	up	0	11.5067	0	0	0	4.58	7.65	22.29	Glyur000462s00025048	GO:0005618(cellular_component:cell wall); GO:0016020(cellular_component:membrane); GO:0005576(cellular_component:extracellular region); GO:0009664(biological_process:plant-type cell wall organization)	K20628	exlX		ENOG4111DWI(G:Carbohydrate transport and metabolism); ENOG410YCRV(G:Carbohydrate transport and metabolism)	PNX93200.1(expansin-a5-like precursor, partial [Trifolium pratense])	sp|O80622|EXP15_ARATH(Expansin-A15 OS=Arabidopsis thaliana OX=3702 GN=EXPA15 PE=2 SV=2)	PF01357.18(Pollen_allerg_1:Pollen allergen); PF03330.15(DPBB_1:Lytic transglycolase)
Glyur001157s00034139	10.0458	1.51e-14	2.22e-12	yes	up	0	5.47	0	0	0	3.23	5.02	8.16	Glyur001157s00034139
Glyur000945s00028139	3.86347	1.69e-14	2.48e-12	yes	up	63.06	692.77	64.86	87.86	36.46	1005.61	696.85	375.85	Glyur000945s00028139	GO:0052593(molecular_function:tryptamine:oxygen oxidoreductase (deaminating) activity); GO:0048038(molecular_function:quinone binding); GO:0052597(molecular_function:diamine oxidase activity); GO:0097185(biological_process:cellular response to azide); GO:0052595(molecular_function:aliphatic-amine oxidase activity); GO:0052594(molecular_function:aminoacetone:oxygen oxidoreductase(deaminating) acti…	K00276	AOC3, AOC2, tynA	map00260(Glycine, serine and threonine metabolism); map00960(Tropane, piperidine and pyridine alkaloid biosynthesis); map00950(Isoquinoline alkaloid biosynthesis); map00360(Phenylalanine metabolism); map00350(Tyrosine metabolism); map00410(beta-Alanine metabolism)	COG3733(Q:Secondary metabolites biosynthesis, transport and catabolism)	XP_024637937.1(primary amine oxidase [Medicago truncatula])	sp|Q43077|AMO_PEA(Primary amine oxidase OS=Pisum sativum OX=3888 PE=1 SV=1)	PF01179.17(Cu_amine_oxid:Copper amine oxidase, enzyme domain); PF02728.13(Cu_amine_oxidN3:Copper amine oxidase, N3 domain); PF02727.13(Cu_amine_oxidN2:Copper amine oxidase, N2 domain)
Glyur000247s00015502	2.48384	1.9e-14	2.77e-12	yes	up	1.40667	5.79	1.71	0.98	1.53	6.6	5.98	4.79	Glyur000247s00015502	GO:0005874(cellular_component:microtubule)				ENOG410YDH8(S:Function unknown)	XP_013457835.1(TORTIFOLIA1-like protein 3 [Medicago truncatula])	sp|Q6NPR6|TORL3_ARATH(TORTIFOLIA1-like protein 3 OS=Arabidopsis thaliana OX=3702 GN=TOR1L3 PE=2 SV=1)	PF02985.19(HEAT:HEAT repeat); PF13646.3(HEAT_2:HEAT repeats); PF13513.3(HEAT_EZ:HEAT-like repeat)
Glyur003799s00036833	4.55227	1.96e-14	2.84e-12	yes	up	0.26	4.00333	0.32	0.34	0.12	4.06	4.26	3.69	Glyur003799s00036833		K18810	CYCD1_2_4		ENOG410XRKC(F:Nucleotide transport and metabolism)	XP_003555300.1(PREDICTED: cyclin-D4-1-like isoform X1 [Glycine max])	sp|Q6YXH8|CCD41_ORYSJ(Cyclin-D4-1 OS=Oryza sativa subsp. japonica OX=39947 GN=CYCD4-1 PE=2 SV=2)	PF00134.20(Cyclin_N:Cyclin, N-terminal domain); PF02984.16(Cyclin_C:Cyclin, C-terminal domain)
Glyur000162s00009918	3.18876	1.98e-14	2.85e-12	yes	up	0.96	6.53333	1.22	0.72	0.94	4.82	6.94	7.84	Glyur000162s00009918	GO:0016021(cellular_component:integral component of membrane); GO:0009055(molecular_function:electron carrier activity)				ENOG410YW92(S:Function unknown)	XP_004501389.1(PREDICTED: early nodulin-like protein 1 [Cicer arietinum])	sp|Q9SK27|ENL1_ARATH(Early nodulin-like protein 1 OS=Arabidopsis thaliana OX=3702 GN=At2g25060 PE=1 SV=2)	PF02298.14(Cu_bind_like:Plastocyanin-like domain)
Glyur003449s00039863	3.13941	2.46e-14	3.51e-12	yes	up	21.68	138.91	19.04	27.01	18.99	187.66	134.15	94.92	Glyur003449s00039863	GO:0008840(molecular_function:4-hydroxy-tetrahydrodipicolinate synthase); GO:0009089(biological_process:lysine biosynthetic process via diaminopimelate)	K01714	dapA	map00300(Lysine biosynthesis); map00261(Monobactam biosynthesis)	COG0329(E:Amino acid transport and metabolism)	XP_004492645.1(PREDICTED: 4-hydroxy-tetrahydrodipicolinate synthase, chloroplastic [Cicer arietinum])	sp|Q42800|DAPA_SOYBN(4-hydroxy-tetrahydrodipicolinate synthase, chloroplastic OS=Glycine max OX=3847 GN=DHPS1 PE=2 SV=1)	PF00701.19(DHDPS:Dihydrodipicolinate synthetase family)
Glyur000497s00020191	4.49611	2.83e-14	4.01e-12	yes	up	0.276667	4.57	0.35	0.07	0.41	3.53	3.97	6.21	Glyur000497s00020191	GO:0016020(cellular_component:membrane)				ENOG4111D31(O:Posttranslational modification, protein turnover, chaperones); ENOG4111991(S:Function unknown); ENOG4111ADX(S:Function unknown); ENOG4111BCK(S:Function unknown)	XP_003608949.1(WAT1-related protein At3g28050 [Medicago truncatula])	sp|Q9FL08|WTR42_ARATH(WAT1-related protein At5g40240 OS=Arabidopsis thaliana OX=3702 GN=At5g40240 PE=2 SV=1)	PF00892.17(EamA:EamA-like transporter family)
Glyur000886s00024459	2.13221	3.09e-14	4.35e-12	yes	up	26.9567	86.4133	27.39	26.33	27.15	53.48	85.5	120.26	Glyur000886s00024459	GO:0051213(molecular_function:dioxygenase activity)				COG3491(S:Function unknown)	POF25068.1(protein srg1 [Quercus suber])	sp|D4N501|DIOX2_PAPSO(Probable 2-oxoglutarate/Fe(II)-dependent dioxygenase OS=Papaver somniferum OX=3469 GN=DIOX2 PE=2 SV=1)	PF14226.3(DIOX_N:non-haem dioxygenase in morphine synthesis N-terminal); PF03171.17(2OG-FeII_Oxy:2OG-Fe(II) oxygenase superfamily)
Glyur000234s00015060	2.68447	3.23e-14	4.53e-12	yes	up	12.9033	63.14	11.07	9.28	18.36	46.28	60.83	82.31	Glyur000234s00015060	GO:0042343(biological_process:indole glucosinolate metabolic process); GO:0004497(molecular_function:monooxygenase activity); GO:0016705(molecular_function:oxidoreductase activity, acting on paired donors, with incorporation or reduction of molecular oxygen); GO:0020037(molecular_function:heme binding); GO:0016709(molecular_function:oxidoreductase activity, acting on paired donors, with incorpora…	K13260	CYP81E1_7	map00943(Isoflavonoid biosynthesis)	COG2124(Q:Secondary metabolites biosynthesis, transport and catabolism)	BAA74465.1(cytochrome P450 [Glycyrrhiza echinata])	sp|P93147|C81E1_GLYEC(Isoflavone 2'-hydroxylase OS=Glycyrrhiza echinata OX=46348 GN=CYP81E1 PE=1 SV=2)	PF00067.19(p450:Cytochrome P450)
Glyur000015s00000842	5.14309	3.69e-14	5.1e-12	yes	up	1.21	33.6833	0.18	1.68	1.77	31.04	29	41.01	Glyur000015s00000842	GO:0006508(biological_process:proteolysis); GO:0004190(molecular_function:aspartic-type endopeptidase activity); GO:0030163(biological_process:protein catabolic process)				ENOG410XNV7(O:Posttranslational modification, protein turnover, chaperones)	XP_020203915.1(aspartyl protease AED3-like [Cajanus cajan])	sp|O04496|AED3_ARATH(Aspartyl protease AED3 OS=Arabidopsis thaliana OX=3702 GN=AED3 PE=1 SV=1)	PF14541.3(TAXi_C:Xylanase inhibitor C-terminal); PF14543.3(TAXi_N:Xylanase inhibitor N-terminal); PF00026.20(Asp:Eukaryotic aspartyl protease)
Glyur003405s00042630	3.80649	3.68e-14	5.1e-12	yes	up	5.04667	50.0067	9.56	3.31	2.27	53.13	45.02	51.87	Glyur003405s00042630	GO:0016021(cellular_component:integral component of membrane); GO:0016020(cellular_component:membrane)	K17279	REEP5_6		COG5052(S:Function unknown)	KHN01204.1(HVA22-like protein c [Glycine soja])	sp|Q9S784|HA22C_ARATH(HVA22-like protein c OS=Arabidopsis thaliana OX=3702 GN=HVA22C PE=2 SV=1)	PF03134.16(TB2_DP1_HVA22:TB2/DP1, HVA22 family)
Glyur000721s00027409	3.02135	4.08e-14	5.6e-12	yes	up	42.74	270.613	28.05	52.78	47.39	193.37	235.82	382.65	Glyur000721s00027409	GO:0004497(molecular_function:monooxygenase activity); GO:0031090(cellular_component:organelle membrane); GO:0020037(molecular_function:heme binding); GO:0033770(molecular_function:2-hydroxyisoflavanone synthase activity); GO:0016705(molecular_function:oxidoreductase activity, acting on paired donors, with incorporation or reduction of molecular oxygen); GO:0009717(biological_process:isoflavonoid…	K13257	CYP93C	map00943(Isoflavonoid biosynthesis)	COG2124(Q:Secondary metabolites biosynthesis, transport and catabolism)	AEQ39023.1(isoflavone synthase [Glycyrrhiza uralensis])	sp|G4XV71|C93C2_GLYUR(2-hydroxyisoflavanone synthase OS=Glycyrrhiza uralensis OX=74613 GN=CYP93C2 PE=2 SV=2)	PF00067.19(p450:Cytochrome P450)
Glyur000024s00006616	5.0152	4.3e-14	5.88e-12	yes	up	0.223333	5.59333	0.06	0.33	0.28	4.98	4.48	7.32	Glyur000024s00006616	GO:0016491(molecular_function:oxidoreductase activity); GO:0020037(molecular_function:heme binding); GO:0050896(biological_process:response to stimulus); GO:0009987(biological_process:cellular process); GO:0004601(molecular_function:peroxidase activity); GO:0098869(biological_process:cellular oxidant detoxification); GO:0042744(biological_process:hydrogen peroxide catabolic process); GO:0005488(m…	K00430	E1.11.1.7	map00940(Phenylpropanoid biosynthesis)	ENOG410YBAI(O:Posttranslational modification, protein turnover, chaperones)	XP_003535116.1(PREDICTED: peroxidase A2-like [Glycine max])	sp|Q9LEH3|PER15_IPOBA(Peroxidase 15 OS=Ipomoea batatas OX=4120 GN=pod PE=1 SV=1)	PF00141.20(peroxidase:Peroxidase)
Glyur001109s00030194	-2.15066	4.69e-14	6.33e-12	yes	down	10.2233	1.76	12.56	8.66	9.45	1.59	2.05	1.64	Glyur001109s00030194	GO:0009941(cellular_component:chloroplast envelope); GO:0009735(biological_process:response to cytokinin); GO:0009570(cellular_component:chloroplast stroma); GO:0005829(cellular_component:cytosol); GO:0006782(biological_process:protoporphyrinogen IX biosynthetic process); GO:0004853(molecular_function:uroporphyrinogen decarboxylase activity)	K01599	hemE, UROD	map00860(Porphyrin and chlorophyll metabolism)	COG0407(L:Replication, recombination and repair)	OIW02747.1(hypothetical protein TanjilG_29523 [Lupinus angustifolius])	sp|Q42967|DCUP_TOBAC(Uroporphyrinogen decarboxylase, chloroplastic OS=Nicotiana tabacum OX=4097 GN=DCUP PE=1 SV=1)	PF01208.14(URO-D:Uroporphyrinogen decarboxylase (URO-D))
Glyur000100s00008360	1.57036	4.7e-14	6.33e-12	yes	up	3.31	7.36333	3.95	2.4	3.58	7.07	7.29	7.73	Glyur000100s00008360	GO:0050664(molecular_function:oxidoreductase activity, acting on NAD(P)H, oxygen as acceptor); GO:0016021(cellular_component:integral component of membrane); GO:0098869(biological_process:cellular oxidant detoxification); GO:0005509(molecular_function:calcium ion binding); GO:0004601(molecular_function:peroxidase activity); GO:0055114(biological_process:oxidation-reduction process)	K13447	RBOH	map04016(MAPK signaling pathway - plant); map04626(Plant-pathogen interaction)	ENOG410XNZY(S:Function unknown)	XP_004503663.1(PREDICTED: respiratory burst oxidase homolog protein A [Cicer arietinum])	sp|Q948U0|RBOHA_SOLTU(Respiratory burst oxidase homolog protein A OS=Solanum tuberosum OX=4113 GN=RBOHA PE=1 SV=1)	PF08030.9(NAD_binding_6:Ferric reductase NAD binding domain); PF08414.7(NADPH_Ox:Respiratory burst NADPH oxidase); PF08022.9(FAD_binding_8:FAD-binding domain); PF01794.16(Ferric_reduct:Ferric reductase like transmembrane component); PF13405.3(EF-hand_6:EF-hand domain); PF00036.29(EF-hand_1:EF hand); PF13499.3(EF-hand_7:EF-hand domain pair); PF13202.3(EF-hand_5:EF hand)
Glyur000783s00023124	3.69028	4.82e-14	6.47e-12	yes	up	0.603333	5.89	0.58	0.72	0.51	7.06	4.71	5.9	Glyur000783s00023124	GO:0004674(molecular_function:protein serine/threonine kinase activity); GO:0006468(biological_process:protein phosphorylation); GO:0005524(molecular_function:ATP binding)	K07760	CDK		ENOG410XPP3(L:Replication, recombination and repair)	XP_003544998.1(PREDICTED: cyclin-dependent kinase B2-2-like [Glycine max])	sp|Q8LG64|CKB22_ARATH(Cyclin-dependent kinase B2-2 OS=Arabidopsis thaliana OX=3702 GN=CDKB2-2 PE=1 SV=2)	PF00069.22(Pkinase:Protein kinase domain); PF07714.14(Pkinase_Tyr:Protein tyrosine kinase)
Glyur000060s00004755	2.79477	5e-14	6.66e-12	yes	up	2.57333	13.5233	2.66	3.25	1.81	14.56	11.44	14.57	Glyur000060s00004755	GO:0010143(biological_process:cutin biosynthetic process); GO:0016791(molecular_function:phosphatase activity); GO:0016311(biological_process:dephosphorylation); GO:0016021(cellular_component:integral component of membrane); GO:0016020(cellular_component:membrane); GO:0090447(molecular_function:glycerol-3-phosphate 2-O-acyltransferase activity); GO:0016746(molecular_function:transferase activity,…	K13508	GPAT	map00564(Glycerophospholipid metabolism); map00561(Glycerolipid metabolism)	ENOG4111C4N(I:Lipid transport and metabolism); ENOG4110PXU(I:Lipid transport and metabolism)	XP_003627569.1(probable glycerol-3-phosphate acyltransferase 8 [Medicago truncatula])	sp|Q5XF03|GPAT8_ARATH(Probable glycerol-3-phosphate acyltransferase 8 OS=Arabidopsis thaliana OX=3702 GN=GPAT8 PE=2 SV=1)	PF12710.4(HAD:haloacid dehalogenase-like hydrolase); PF01553.18(Acyltransferase:Acyltransferase)
Glyur000142s00009096	-2.23523	5.36e-14	7.05e-12	yes	down	45.7533	8.05667	40.38	43.95	52.93	6.21	9.36	8.6	Glyur000142s00009096					ENOG41104E3(S:Function unknown); ENOG4111E40(S:Function unknown); ENOG410YXAM(S:Function unknown); ENOG41116IZ(S:Function unknown)	KHN35344.1(hypothetical protein glysoja_028974 [Glycine soja])		PF14009.3(DUF4228:Domain of unknown function (DUF4228))
Glyur000018s00003720	2.2909	5.34e-14	7.05e-12	yes	up	1.34667	4.83	1.47	1.28	1.29	4.87	5.39	4.23	Glyur000018s00003720					ENOG410YB2T(S:Function unknown)	XP_019456640.1(PREDICTED: IRK-interacting protein-like [Lupinus angustifolius])	sp|F4KGE8|GIL1_ARATH(Protein GRAVITROPIC IN THE LIGHT 1 OS=Arabidopsis thaliana OX=3702 GN=GIL1 PE=2 SV=1)	PF04859.9(DUF641:Plant protein of unknown function (DUF641))
Glyur000038s00004439	-1.34416	5.57e-14	7.29e-12	yes	down	42.36	12.67	46.52	41.27	39.29	10.17	14.63	13.21	Glyur000038s00004439					COG0542(O:Posttranslational modification, protein turnover, chaperones)	XP_006602094.1(PREDICTED: uncharacterized protein LOC100776148 [Glycine max])	sp|O80875|SMXL7_ARATH(Protein SMAX1-LIKE 7 OS=Arabidopsis thaliana OX=3702 GN=SMXL7 PE=1 SV=1)	PF07724.11(AAA_2:AAA domain (Cdc48 subfamily))
Glyur000119s00012152	4.53642	5.85e-14	7.6e-12	yes	up	1.11667	18.1933	1.83	0.6	0.92	25.51	15.59	13.48	Glyur000119s00012152					COG2050(Q:Secondary metabolites biosynthesis, transport and catabolism)	NP_001235185.1(uncharacterized protein LOC100527631 [Glycine max])	sp|Q9SX65|DNAT1_ARATH(1,4-dihydroxy-2-naphthoyl-CoA thioesterase 1 OS=Arabidopsis thaliana OX=3702 GN=DHNAT1 PE=1 SV=1)	PF03061.19(4HBT:Thioesterase superfamily)
Glyur000578s00021006	-1.30592	6.55e-14	8.47e-12	yes	down	46.6667	14.34	50.71	39.26	50.03	11.38	16.81	14.83	Glyur000578s00021006	GO:0046921(molecular_function:alpha-(1->6)-fucosyltransferase activity); GO:0006487(biological_process:protein N-linked glycosylation); GO:0016021(cellular_component:integral component of membrane); GO:0036071(biological_process:N-glycan fucosylation)				ENOG410Y37Q(S:Function unknown)	XP_006606455.1(PREDICTED: uncharacterized protein LOC100814689 isoform X1 [Glycine max])
Glyur000003s00001231	3.82032	7.14e-14	9.17e-12	yes	up	0.483333	5.12667	0.71	0.56	0.18	5	4.91	5.47	Glyur000003s00001231		K15095	E1.1.1.208	map00902(Monoterpenoid biosynthesis)	COG1028(S:Function unknown)	XP_013449317.2((+)-neomenthol dehydrogenase [Medicago truncatula])	sp|Q9M2E2|SDR1_ARATH((+)-neomenthol dehydrogenase OS=Arabidopsis thaliana OX=3702 GN=SDR1 PE=1 SV=1)	PF00106.22(adh_short:short chain dehydrogenase); PF13561.3(adh_short_C2:Enoyl-(Acyl carrier protein) reductase); PF08659.7(KR:KR domain); PF01370.18(Epimerase:NAD dependent epimerase/dehydratase family)
Glyur000202s00015405	2.80022	7.26e-14	9.27e-12	yes	up	3.18667	16.16	4.64	2.66	2.26	19.58	14.83	14.07	Glyur000202s00015405					ENOG410YRQA(U:Intracellular trafficking, secretion, and vesicular transport); ENOG410YQMA(S:Function unknown)	CDY15265.1(BnaC05g01440D [Brassica napus])	sp|Q9M015|Y5161_ARATH(Uncharacterized protein At5g01610 OS=Arabidopsis thaliana OX=3702 GN=At5g01610 PE=1 SV=1)	PF04398.9(DUF538:Protein of unknown function, DUF538)
Glyur000071s00005298	4.10072	7.95e-14	1.01e-11	yes	up	4.85333	63.9	5.34	7.64	1.58	58.86	58.21	74.63	Glyur000071s00005298					ENOG4111D72(S:Function unknown)	XP_020230922.1(protein E6-like [Cajanus cajan])	sp|Q01197|E6_GOSHI(Protein E6 OS=Gossypium hirsutum OX=3635 GN=E6 PE=2 SV=1)
Glyur000057s00009017	3.49977	8.49e-14	1.07e-11	yes	up	2.31667	19.56	1.86	2.2	2.89	27.43	19.68	11.57	Glyur000057s00009017	GO:0005773(cellular_component:vacuole); GO:0005544(molecular_function:calcium-dependent phospholipid binding); GO:0005509(molecular_function:calcium ion binding)				ENOG410XPUN(S:Function unknown)	XP_003546730.1(PREDICTED: annexin D3 [Glycine max])	sp|Q9SE45|ANXD3_ARATH(Annexin D3 OS=Arabidopsis thaliana OX=3702 GN=ANN3 PE=2 SV=2)	PF00191.17(Annexin:Annexin)
Glyur000061s00006498	-1.93375	8.67e-14	1.09e-11	yes	down	22.33	4.44667	26.33	21.28	19.38	3.11	5.54	4.69	Glyur000061s00006498	GO:0019988(biological_process:charged-tRNA amino acid modification); GO:0043399(molecular_function:tRNA A64-2'-O-ribosylphosphate transferase activity)	K15463	RIT1		ENOG410ZJFF(S:Function unknown)	XP_004503482.1(PREDICTED: uncharacterized protein C3F10.06c isoform X1 [Cicer arietinum])	sp|Q10181|YAW6_SCHPO(Uncharacterized protein C3F10.06c OS=Schizosaccharomyces pombe (strain 972 / ATCC 24843) OX=284812 GN=SPAC3F10.06c PE=4 SV=1)	PF17184.1(Rit1_C:Rit1 N-terminal domain); PF04179.9(Init_tRNA_PT:Rit1 DUSP-like domain); PF00782.17(DSPc:Dual specificity phosphatase, catalytic domain)
Glyur000042s00005114	2.763	9.16e-14	1.14e-11	yes	up	3.64	19.08	2.65	4.77	3.5	17.06	17.67	22.51	Glyur000042s00005114	GO:0016722(molecular_function:oxidoreductase activity, oxidizing metal ions); GO:0009506(cellular_component:plasmodesma); GO:0005507(molecular_function:copper ion binding); GO:0009505(cellular_component:plant-type cell wall); GO:0055114(biological_process:oxidation-reduction process); GO:0016491(molecular_function:oxidoreductase activity)				COG2132(Q:Secondary metabolites biosynthesis, transport and catabolism)	XP_020216553.1(L-ascorbate oxidase homolog [Cajanus cajan])	sp|P29162|ASOL_TOBAC(L-ascorbate oxidase homolog OS=Nicotiana tabacum OX=4097 PE=2 SV=1)	PF07732.12(Cu-oxidase_3:Multicopper oxidase); PF00394.19(Cu-oxidase:Multicopper oxidase); PF07731.11(Cu-oxidase_2:Multicopper oxidase)
Glyur001957s00039090	2.25356	9.48e-14	1.18e-11	yes	up	2.63	9.29333	2.51	2.04	3.34	10.41	8.79	8.68	Glyur001957s00039090	GO:0016157(molecular_function:sucrose synthase activity); GO:0005985(biological_process:sucrose metabolic process)	K00695	E2.4.1.13	map00500(Starch and sucrose metabolism)	COG0438(O:Posttranslational modification, protein turnover, chaperones)	XP_012574466.1(PREDICTED: sucrose synthase-like isoform X1 [Cicer arietinum])	sp|P13708|SUS_SOYBN(Sucrose synthase OS=Glycine max OX=3847 GN=SS PE=1 SV=2)	PF00862.16(Sucrose_synth:Sucrose synthase); PF00534.17(Glycos_transf_1:Glycosyl transferases group 1); PF13692.3(Glyco_trans_1_4:Glycosyl transferases group 1); PF13524.3(Glyco_trans_1_2:Glycosyl transferases group 1)
Glyur000089s00008825	2.08551	9.68e-14	1.2e-11	yes	up	19.34	61.59	16.1	16.31	25.61	59.9	56.94	67.93	Glyur000089s00008825		K00801	FDFT1	map00909(Sesquiterpenoid and triterpenoid biosynthesis); map00100(Steroid biosynthesis)	COG1562(I:Lipid transport and metabolism)	ADG36704.1(squalene synthase 1 [Glycyrrhiza uralensis])	sp|P53800|FDFT_NICBE(Squalene synthase OS=Nicotiana benthamiana OX=4100 PE=2 SV=1)	PF00494.16(SQS_PSY:Squalene/phytoene synthase)
Glyur000038s00004453	1.51641	1.03e-13	1.27e-11	yes	up	52.6733	112.147	67.34	40.98	49.7	115.18	105.94	115.32	Glyur000038s00004453	GO:0008152(biological_process:metabolic process); GO:0016788(molecular_function:hydrolase activity, acting on ester bonds)	K01114	plc	map00565(Ether lipid metabolism); map00564(Glycerophospholipid metabolism); map02024(Quorum sensing); map00562(Inositol phosphate metabolism); map04919(Thyroid hormone signaling pathway)	COG3511(S:Function unknown)	XP_004500251.1(PREDICTED: non-specific phospholipase C1 [Cicer arietinum])	sp|Q8L7Y9|NPC1_ARATH(Non-specific phospholipase C1 OS=Arabidopsis thaliana OX=3702 GN=NPC1 PE=2 SV=1)	PF04185.11(Phosphoesterase:Phosphoesterase family)
Glyur000057s00009015	6.62171	1.37e-13	1.67e-11	yes	up	0.09	5.43333	0.15	0.05	0.07	7.31	5.08	3.91	Glyur000057s00009015	GO:0006970(biological_process:response to osmotic stress); GO:0009737(biological_process:response to abscisic acid); GO:0005544(molecular_function:calcium-dependent phospholipid binding); GO:0005509(molecular_function:calcium ion binding); GO:0009506(cellular_component:plasmodesma)	K17099	ANXA13		ENOG410XPUN(S:Function unknown)	XP_004511009.1(PREDICTED: annexin D4 [Cicer arietinum])	sp|Q9ZVJ6|ANXD4_ARATH(Annexin D4 OS=Arabidopsis thaliana OX=3702 GN=ANN4 PE=1 SV=1)	PF00191.17(Annexin:Annexin)
Glyur000044s00005193	4.42554	1.56e-13	1.9e-11	yes	up	0.806667	12.84	1	0.89	0.53	11.2	8.91	18.41	Glyur000044s00005193	GO:0016021(cellular_component:integral component of membrane)				ENOG410YN13(S:Function unknown)	XP_004504966.1(PREDICTED: uncharacterized protein LOC101503226 [Cicer arietinum])		PF04398.9(DUF538:Protein of unknown function, DUF538)
Glyur000267s00016661	9.98194	1.59e-13	1.92e-11	yes	up	0	5.96333	0	0	0	2.49	5.53	9.87	Glyur000267s00016661	GO:0006418(biological_process:tRNA aminoacylation for protein translation); GO:0004812(molecular_function:aminoacyl-tRNA ligase activity); GO:0000166(molecular_function:nucleotide binding)	K01876	aspS	map00970(Aminoacyl-tRNA biosynthesis)	COG0017(J:Translation, ribosomal structure and biogenesis)	XP_004512467.1(PREDICTED: aspartate--tRNA ligase, cytoplasmic-like [Cicer arietinum])	sp|Q9M084|SYDC2_ARATH(Aspartate--tRNA ligase 2, cytoplasmic OS=Arabidopsis thaliana OX=3702 GN=IBI1 PE=1 SV=1)	PF00152.17(tRNA-synt_2:tRNA synthetases class II (D, K and N)); PF01336.22(tRNA_anti-codon:OB-fold nucleic acid binding domain); PF01409.17(tRNA-synt_2d:tRNA synthetases class II core domain (F))
Glyur000525s00018825	-1.96416	1.61e-13	1.94e-11	yes	down	47.53	9.35	53.06	43.53	46	7.76	12.97	7.32	Glyur000525s00018825	GO:0016021(cellular_component:integral component of membrane)				ENOG41115QZ(O:Posttranslational modification, protein turnover, chaperones); ENOG410YGW9(S:Function unknown)	KRH22089.1(hypothetical protein GLYMA_13G277000 [Glycine max])
Glyur000734s00026336	-2.44475	1.88e-13	2.24e-11	yes	down	72.1233	9.85	84.57	78.64	53.16	5.63	11.71	12.21	Glyur000734s00026336	GO:0016020(cellular_component:membrane); GO:0046872(molecular_function:metal ion binding); GO:0016874(molecular_function:ligase activity); GO:0008270(molecular_function:zinc ion binding)	K10666	RNF5	map04141(Protein processing in endoplasmic reticulum)	ENOG4111IHV(O:Posttranslational modification, protein turnover, chaperones)	GAU27602.1(hypothetical protein TSUD_271430 [Trifolium subterraneum])	sp|Q6R567|RMA1_CAPAN(E3 ubiquitin-protein ligase RMA1H1 OS=Capsicum annuum OX=4072 GN=RMA1H1 PE=1 SV=1)	PF13923.3(zf-C3HC4_2:Zinc finger, C3HC4 type (RING finger)); PF00097.22(zf-C3HC4:Zinc finger, C3HC4 type (RING finger)); PF13920.3(zf-C3HC4_3:Zinc finger, C3HC4 type (RING finger)); PF13445.3(zf-RING_UBOX:RING-type zinc-finger); PF14634.3(zf-RING_5:zinc-RING finger domain); PF13639.3(zf-RING_2:Ring finger domain); PF15227.3(zf-C3HC4_4:zinc finger of C3HC4-type, RING)
Glyur003997s00043752	-1.97576	2.25e-13	2.67e-11	yes	down	25.11	4.37	34.37	17.25	23.71	4.2	4.82	4.09	Glyur003997s00043752					ENOG410YBC8(S:Function unknown)	PNY09414.1(magnesium transporter CorA-like family protein [Trifolium pratense])
Glyur001277s00024297	1.9514	2.26e-13	2.67e-11	yes	up	43.3767	127.033	39.54	49.31	41.28	136.61	122.24	122.25	Glyur001277s00024297	GO:0016787(molecular_function:hydrolase activity)				COG0494(L:Replication, recombination and repair)	XP_017425231.1(PREDICTED: nudix hydrolase 15, mitochondrial-like [Vigna angularis])	sp|Q8GYB1|NUD15_ARATH(Nudix hydrolase 15, mitochondrial OS=Arabidopsis thaliana OX=3702 GN=NUDT15 PE=1 SV=2)	PF00293.25(NUDIX:NUDIX domain)
Glyur000275s00017061	5.41908	2.48e-13	2.91e-11	yes	up	1.34	46.3633	0.59	2.9	0.53	69.62	42.67	26.8	Glyur000275s00017061	GO:0016052(biological_process:carbohydrate catabolic process); GO:0005975(biological_process:carbohydrate metabolic process); GO:0050392(molecular_function:vicianin beta-glucosidase activity); GO:0004553(molecular_function:hydrolase activity, hydrolyzing O-glycosyl compounds)	K01188	E3.2.1.21	map00460(Cyanoamino acid metabolism); map00500(Starch and sucrose metabolism); map00940(Phenylpropanoid biosynthesis)	COG2723(T:Signal transduction mechanisms)	XP_003599013.1(vicianin hydrolase [Medicago truncatula])	sp|A2SY66|VICHY_VICSN(Vicianin hydrolase (Fragment) OS=Vicia sativa subsp. nigra OX=3909 PE=1 SV=1)	PF00232.15(Glyco_hydro_1:Glycosyl hydrolase family 1)
Glyur004263s00037662	2.78312	2.7e-13	3.15e-11	yes	up	9.28667	26.89	12.31	4.79	10.76	17.99	25.72	36.96	Glyur004263s00037662	GO:0097159(molecular_function:organic cyclic compound binding); GO:0016818(molecular_function:hydrolase activity, acting on acid anhydrides, in phosphorus-containing anhydrides); GO:1901363(molecular_function:heterocyclic compound binding)	K11654	SMARCA5, SNF2H, ISWI		COG0553(L:Replication, recombination and repair)	XP_020220338.1(ISWI chromatin-remodeling complex ATPase CHR11 [Cajanus cajan])	sp|Q8RWY3|ISW2_ARATH(ISWI chromatin-remodeling complex ATPase CHR11 OS=Arabidopsis thaliana OX=3702 GN=CHR11 PE=1 SV=4)	PF00271.28(Helicase_C:Helicase conserved C-terminal domain); PF09110.8(HAND:HAND); PF00249.28(Myb_DNA-binding:Myb-like DNA-binding domain)
Glyur000033s00008628	3.2984	3.21e-13	3.73e-11	yes	up	1.22667	9.32667	1.21	1.75	0.72	7.83	7.99	12.16	Glyur000033s00008628	GO:0030570(molecular_function:pectate lyase activity); GO:0045490(biological_process:pectin catabolic process); GO:0046872(molecular_function:metal ion binding)	K01728	pel	map00040(Pentose and glucuronate interconversions); map02024(Quorum sensing)	COG3866(S:Function unknown)	XP_004497757.2(PREDICTED: probable pectate lyase 1 [Cicer arietinum])	sp|Q940Q1|PLY1_ARATH(Probable pectate lyase 1 OS=Arabidopsis thaliana OX=3702 GN=At1g04680 PE=2 SV=2)	PF00544.16(Pec_lyase_C:Pectate lyase); PF13229.3(Beta_helix:Right handed beta helix region)
Glyur000316s00018288	-2.33006	3.29e-13	3.81e-11	yes	down	70.33	10.55	90.96	57.82	62.21	8.39	15.77	7.49	Glyur000316s00018288	GO:0006857(biological_process:oligopeptide transport); GO:0005215(molecular_function:transporter activity); GO:0016021(cellular_component:integral component of membrane)	K14638	SLC15A3_4, PHT		COG3104(E:Amino acid transport and metabolism)	PNY13812.1(nitrate transporter [Trifolium pratense])	sp|Q9SZY4|PTR27_ARATH(Protein NRT1/ PTR FAMILY 6.2 OS=Arabidopsis thaliana OX=3702 GN=NPF6.2 PE=1 SV=1)	PF00854.18(PTR2:POT family)
Glyur002907s00033935	3.32811	3.38e-13	3.88e-11	yes	up	4.53667	36.02	2.71	6.69	4.21	26.88	31.79	49.39	Glyur002907s00033935	GO:0004506(molecular_function:squalene monooxygenase activity); GO:0016021(cellular_component:integral component of membrane); GO:0050660(molecular_function:flavin adenine dinucleotide binding); GO:0055114(biological_process:oxidation-reduction process)	K00511	SQLE, ERG1	map00909(Sesquiterpenoid and triterpenoid biosynthesis); map00100(Steroid biosynthesis)	COG0654(C:Energy production and conversion); COG0654(H:Coenzyme transport and metabolism)	XP_020206800.1(squalene monooxygenase-like [Cajanus cajan])	sp|O48651|ERG1_PANGI(Squalene monooxygenase OS=Panax ginseng OX=4054 PE=2 SV=1)	PF08491.7(SE:Squalene epoxidase); PF01494.16(FAD_binding_3:FAD binding domain); PF01266.21(DAO:FAD dependent oxidoreductase); PF00890.21(FAD_binding_2:FAD binding domain); PF13450.3(NAD_binding_8:NAD(P)-binding Rossmann-like domain); PF01946.14(Thi4:Thi4 family); PF07992.11(Pyr_redox_2:Pyridine nucleotide-disulphide oxidoreductase)
Glyur001363s00029391	3.80439	3.67e-13	4.2e-11	yes	up	0.446667	4.76	0.58	0.59	0.17	3.86	4.31	6.11	Glyur001363s00029391	GO:0005794(cellular_component:Golgi apparatus); GO:0016021(cellular_component:integral component of membrane); GO:0009506(cellular_component:plasmodesma); GO:0005886(cellular_component:plasma membrane)				COG5594(P:Inorganic ion transport and metabolism)	XP_020228481.1(CSC1-like protein At1g32090 [Cajanus cajan])	sp|Q9FVQ5|CSCL1_ARATH(CSC1-like protein At1g32090 OS=Arabidopsis thaliana OX=3702 GN=At1g32090 PE=1 SV=1)	PF02714.12(RSN1_7TM:Calcium-dependent channel, 7TM region, putative phosphate); PF13967.3(RSN1_TM:Late exocytosis, associated with Golgi transport); PF14703.3(PHM7_cyt:Cytosolic domain of 10TM putative phosphate transporter)
Glyur000081s00006736	-1.82085	4.77e-13	5.43e-11	yes	down	90.37	18.73	79.49	96.92	94.7	14.49	22.92	18.78	Glyur000081s00006736	GO:0016310(biological_process:phosphorylation); GO:0004672(molecular_function:protein kinase activity)				COG0515(T:Signal transduction mechanisms)	XP_020213153.1(probable serine/threonine-protein kinase PBL7 [Cajanus cajan])	sp|Q0WRY5|PBL7_ARATH(Probable serine/threonine-protein kinase PBL7 OS=Arabidopsis thaliana OX=3702 GN=PBL7 PE=1 SV=1)	PF00069.22(Pkinase:Protein kinase domain); PF07714.14(Pkinase_Tyr:Protein tyrosine kinase)
Glyur000020s00001765	-1.12792	5.09e-13	5.77e-11	yes	down	97.0467	32.6333	117.33	81.53	92.28	27.22	37.15	33.53	Glyur000020s00001765	GO:0016021(cellular_component:integral component of membrane); GO:0055085(biological_process:transmembrane transport)				ENOG410Y8WV(S:Function unknown); ENOG410XQ3D(S:Function unknown)	XP_004486805.1(PREDICTED: protein NUCLEAR FUSION DEFECTIVE 4-like [Cicer arietinum])	sp|F4I9E1|NFD4_ARATH(Protein NUCLEAR FUSION DEFECTIVE 4 OS=Arabidopsis thaliana OX=3702 GN=NFD4 PE=3 SV=1)	PF06813.10(Nodulin-like:Nodulin-like); PF07690.13(MFS_1:Major Facilitator Superfamily)
Glyur000046s00004795	3.86895	5.21e-13	5.87e-11	yes	up	0.31	3.11	0.3	0.31	0.32	3.33	3.03	2.97	Glyur000046s00004795					ENOG4111YDY(S:Function unknown); ENOG4111824(S:Function unknown)	XP_020218097.1(protein WVD2-like 3 [Cajanus cajan])	sp|Q84WL6|WDL3_ARATH(Protein WVD2-like 3 OS=Arabidopsis thaliana OX=3702 GN=WDL3 PE=1 SV=1)	PF06886.8(TPX2:Targeting protein for Xklp2 (TPX2))
Glyur001072s00031300	7.65374	5.62e-13	6.3e-11	yes	up	0.0833333	12.26	0	0.2	0.05	22.31	11.91	2.56	Glyur001072s00031300	GO:0016829(molecular_function:lyase activity); GO:0046872(molecular_function:metal ion binding)				ENOG410YBXH(S:Function unknown)	XP_013455657.1(probable terpene synthase 2 [Medicago truncatula])	sp|B9SCB6|TPS2_RICCO(Probable terpene synthase 2 OS=Ricinus communis OX=3988 GN=TPS2 PE=3 SV=1)	PF03936.13(Terpene_synth_C:Terpene synthase family, metal binding domain); PF01397.18(Terpene_synth:Terpene synthase, N-terminal domain)
Glyur001671s00039464	2.99613	5.76e-13	6.39e-11	yes	up	0.556667	3.46667	0.6	0.7	0.37	3.78	3.15	3.47	Glyur001671s00039464	GO:0016021(cellular_component:integral component of membrane); GO:0015079(molecular_function:potassium ion transmembrane transporter activity); GO:0071805(biological_process:potassium ion transmembrane transport)	K03549	kup		COG3158(G:Carbohydrate transport and metabolism)	KDO82513.1(hypothetical protein CISIN_1g004007mg [Citrus sinensis])	sp|Q8W4I4|POT6_ARATH(Potassium transporter 6 OS=Arabidopsis thaliana OX=3702 GN=POT6 PE=2 SV=1)	PF02705.13(K_trans:K+ potassium transporter)
Glyur000226s00010849	-1.15319	5.76e-13	6.39e-11	yes	down	97.6233	33.0867	110.56	89.04	93.27	27.15	38.84	33.27	Glyur000226s00010849	GO:0005975(biological_process:carbohydrate metabolic process); GO:0005783(cellular_component:endoplasmic reticulum); GO:0016021(cellular_component:integral component of membrane); GO:0030247(molecular_function:polysaccharide binding); GO:0046658(cellular_component:anchored component of plasma membrane); GO:0004553(molecular_function:hydrolase activity, hydrolyzing O-glycosyl compounds); GO:000715…				ENOG410YA4N(G:Carbohydrate transport and metabolism); ENOG4111BDN(G:Carbohydrate transport and metabolism)	AIR93906.1(glucanase [Cicer arietinum])	sp|Q8L868|E1311_ARATH(Glucan endo-1,3-beta-glucosidase 11 OS=Arabidopsis thaliana OX=3702 GN=At1g32860 PE=1 SV=1)	PF00332.15(Glyco_hydro_17:Glycosyl hydrolases family 17)
Glyur000029s00003675	2.1786	5.87e-13	6.47e-11	yes	up	2.87	9.42333	3.96	1.97	2.68	10.71	9.17	8.39	Glyur000029s00003675	GO:0004707(molecular_function:MAP kinase activity); GO:0000165(biological_process:MAPK cascade); GO:0005524(molecular_function:ATP binding); GO:0005622(cellular_component:intracellular)				ENOG410XNY0(T:Signal transduction mechanisms)	KHN18099.1(Mitogen-activated protein kinase 10 [Glycine soja])	sp|Q5ZCI1|MPK10_ORYSJ(Mitogen-activated protein kinase 10 OS=Oryza sativa subsp. japonica OX=39947 GN=MPK10 PE=2 SV=2)	PF00069.22(Pkinase:Protein kinase domain); PF07714.14(Pkinase_Tyr:Protein tyrosine kinase); PF06293.11(Kdo:Lipopolysaccharide kinase (Kdo/WaaP) family)
Glyur000018s00003744	-2.72947	5.89e-13	6.47e-11	yes	down	185.957	20.1533	175.31	111.82	270.74	14.65	29.91	15.9	Glyur000018s00003744	GO:0016310(biological_process:phosphorylation); GO:0016020(cellular_component:membrane); GO:0016301(molecular_function:kinase activity)				COG4886(S:Function unknown); COG0515(T:Signal transduction mechanisms); ENOG4111IV8(S:Function unknown)	OVA14371.1(Protein kinase domain [Macleaya cordata])	sp|C0LGN2|Y3148_ARATH(Probable leucine-rich repeat receptor-like serine/threonine-protein kinase At3g14840 OS=Arabidopsis thaliana OX=3702 GN=LRR-RLK PE=1 SV=1)	PF11721.5(Malectin:Di-glucose binding within endoplasmic reticulum); PF07714.14(Pkinase_Tyr:Protein tyrosine kinase); PF00069.22(Pkinase:Protein kinase domain); PF13855.3(LRR_8:Leucine rich repeat); PF12799.4(LRR_4:Leucine Rich repeats (2 copies)); PF12819.4(Malectin_like:Carbohydrate-binding protein of the ER)
Glyur000720s00020697	2.48886	6.18e-13	6.75e-11	yes	up	2.41333	9.98667	2.47	1.58	3.19	10.36	8.61	10.99	Glyur000720s00020697	GO:0016787(molecular_function:hydrolase activity)	K19882	NOTUM	map04310(Wnt signaling pathway)	ENOG410XQKD(S:Function unknown)	XP_004495849.1(PREDICTED: pectin acetylesterase 6-like [Cicer arietinum])	sp|Q66GM8|PAE10_ARATH(Pectin acetylesterase 10 OS=Arabidopsis thaliana OX=3702 GN=PAE10 PE=2 SV=1)	PF03283.10(PAE:Pectinacetylesterase)
Glyur000916s00027858	2.39513	6.36e-13	6.91e-11	yes	up	2.83667	11.1367	3	2.42	3.09	13.01	12.44	7.96	Glyur000916s00027858					ENOG410Y3Q0(S:Function unknown)	KVH98381.1(CRAL-TRIO domain-containing protein [Cynara cardunculus var. scolymus])	sp|Q55CU8|PITC_DICDI(Phosphatidylinositol transfer protein 3 OS=Dictyostelium discoideum OX=44689 GN=pitC PE=2 SV=1)	PF00650.17(CRAL_TRIO:CRAL/TRIO domain); PF03765.12(CRAL_TRIO_N:CRAL/TRIO, N-terminal domain)
Glyur000057s00009012	3.18911	7.35e-13	7.96e-11	yes	up	13.2267	89.99	7.52	18.04	14.12	93.8	85.13	91.04	Glyur000057s00009012	GO:0005544(molecular_function:calcium-dependent phospholipid binding); GO:0005509(molecular_function:calcium ion binding)	K17094;K17095	ANXA6;ANXA7_11		ENOG410XPUN(S:Function unknown)	XP_022139071.1(annexin A6-like [Momordica charantia])	sp|P51074|ANX4_FRAAN(Annexin-like protein RJ4 OS=Fragaria ananassa OX=3747 PE=2 SV=2)	PF00191.17(Annexin:Annexin)
Glyur000681s00027307	2.9275	7.45e-13	8.02e-11	yes	up	0.65	3.71333	0.83	0.51	0.61	2.57	3.55	5.02	Glyur000681s00027307	GO:0003824(molecular_function:catalytic activity); GO:0016874(molecular_function:ligase activity)	K01904	4CL	map00130(Ubiquinone and other terpenoid-quinone biosynthesis); map00940(Phenylpropanoid biosynthesis); map00360(Phenylalanine metabolism)	COG0318(G:Carbohydrate transport and metabolism)	AAL35216.1(4-coumarate:CoA ligase [Amorpha fruticosa])	sp|O24540|4CL_VANPL(4-coumarate--CoA ligase OS=Vanilla planifolia OX=51239 GN=4CL PE=3 SV=1)	PF00501.25(AMP-binding:AMP-binding enzyme)
Glyur000042s00005048	3.85263	8.45e-13	9.05e-11	yes	up	0.57	5.41667	0.61	0.73	0.37	5.63	3.5	7.12	Glyur000042s00005048	GO:0046658(cellular_component:anchored component of plasma membrane); GO:0016787(molecular_function:hydrolase activity); GO:0030247(molecular_function:polysaccharide binding); GO:0004553(molecular_function:hydrolase activity, hydrolyzing O-glycosyl compounds)				ENOG410YBVE(G:Carbohydrate transport and metabolism); ENOG410YBFD(S:Function unknown)	XP_019421021.1(PREDICTED: glucan endo-1,3-beta-glucosidase 1 [Lupinus angustifolius])	sp|Q9FJU9|E1313_ARATH(Glucan endo-1,3-beta-glucosidase 13 OS=Arabidopsis thaliana OX=3702 GN=At5g56590 PE=1 SV=1)	PF07983.10(X8:X8 domain); PF00332.15(Glyco_hydro_17:Glycosyl hydrolases family 17)
Glyur000012s00000550	3.25314	8.61e-13	9.18e-11	yes	up	1.05667	7.78667	0.75	1.53	0.89	8.03	7.83	7.5	Glyur000012s00000550	GO:0016787(molecular_function:hydrolase activity); GO:0005829(cellular_component:cytosol); GO:0009451(biological_process:RNA modification); GO:0008270(molecular_function:zinc ion binding); GO:0047974(molecular_function:guanosine deaminase activity)				COG0590(F:Nucleotide transport and metabolism); COG0590(J:Translation, ribosomal structure and biogenesis)	XP_004508073.1(PREDICTED: uncharacterized protein LOC101506670 [Cicer arietinum])	sp|Q94BU8|GSDA_ARATH(Guanosine deaminase OS=Arabidopsis thaliana OX=3702 GN=GSDA PE=1 SV=1)	PF00383.20(dCMP_cyt_deam_1:Cytidine and deoxycytidylate deaminase zinc-binding region); PF14437.3(MafB19-deam:MafB19-like deaminase)
Glyur000248s00011325	3.38458	8.73e-13	9.26e-11	yes	up	1.63333	13.01	0.82	1.82	2.26	13.48	13.61	11.94	Glyur000248s00011325		K09422	MYBP		COG5147(K:Transcription)	ASM90797.1(MYB [Ammopiptanthus nanus])	sp|Q7XBH4|MYB4_ORYSJ(Transcription factor MYB4 OS=Oryza sativa subsp. japonica OX=39947 GN=MYB4 PE=2 SV=2)	PF00249.28(Myb_DNA-binding:Myb-like DNA-binding domain); PF13921.3(Myb_DNA-bind_6:Myb-like DNA-binding domain)
Glyur000049s00003130	1.97175	9.45e-13	9.97e-11	yes	up	4.83667	14.0833	5.28	3.9	5.33	12.84	15.38	14.03	Glyur000049s00003130	GO:0044711(biological_process:single-organism biosynthetic process); GO:0080090(biological_process:regulation of primary metabolic process); GO:0031326(biological_process:regulation of cellular biosynthetic process); GO:0030234(molecular_function:enzyme regulator activity); GO:0043167(molecular_function:ion binding); GO:0065007(biological_process:biological regulation); GO:0006351(biological_proc…				COG0347(E:Amino acid transport and metabolism)	NP_001237906.2(nitrogen regulatory P-II-like protein [Glycine max])	sp|Q9ZST4|GLNB_ARATH(Nitrogen regulatory protein P-II homolog OS=Arabidopsis thaliana OX=3702 GN=GLB1 PE=1 SV=1)	PF00543.19(P-II:Nitrogen regulatory protein P-II)
Glyur005483s00046855	6.48532	1.13e-12	1.18e-10	yes	up	1.00667	68.9867	0	3.02	0	56.89	58.88	91.19	Glyur005483s00046855		K14641	APY1_2	map00240(Pyrimidine metabolism); map00230(Purine metabolism)	COG5371(G:Carbohydrate transport and metabolism); COG5371(O:Posttranslational modification, protein turnover, chaperones)	BAM84273.1(apyrase [Medicago truncatula])	sp|P52914|NTPA_PEA(Nucleoside-triphosphatase OS=Pisum sativum OX=3888 PE=2 SV=1)	PF01150.14(GDA1_CD39:GDA1/CD39 (nucleoside phosphatase) family)
Glyur000334s00019184	2.65485	1.14e-12	1.19e-10	yes	up	13.2567	60.95	11.25	15.9	12.62	57.31	56.59	68.95	Glyur000334s00019184	GO:0044212(molecular_function:transcription regulatory region DNA binding); GO:0043565(molecular_function:sequence-specific DNA binding); GO:0003700(molecular_function:transcription factor activity, sequence-specific DNA binding); GO:0006355(biological_process:regulation of transcription, DNA-templated); GO:0009845(biological_process:seed germination); GO:0046982(molecular_function:protein hetero…				ENOG41119H6(K:Transcription); ENOG410ZM7Q(K:Transcription); ENOG410YNBU(K:Transcription); ENOG410ZF9H(S:Function unknown); ENOG410YP2C(K:Transcription)	KRH05862.1(hypothetical protein GLYMA_17G253200 [Glycine max])	sp|O65683|BZP11_ARATH(bZIP transcription factor 11 OS=Arabidopsis thaliana OX=3702 GN=BZIP11 PE=1 SV=1)	PF00170.18(bZIP_1:bZIP transcription factor); PF07716.12(bZIP_2:Basic region leucine zipper)
Glyur000761s00025808	5.24145	1.16e-12	1.2e-10	yes	up	0.243333	8.71667	0	0.41	0.32	8.76	6.91	10.48	Glyur000761s00025808	GO:0006508(biological_process:proteolysis); GO:0004185(molecular_function:serine-type carboxypeptidase activity); GO:0051603(biological_process:proteolysis involved in cellular protein catabolic process)	K16297	SCPL-II		COG2939(E:Amino acid transport and metabolism)	CAC19488.1(putative serine carboxypeptidase, partial [Pisum sativum])	sp|Q0WRX3|SCP40_ARATH(Serine carboxypeptidase-like 40 OS=Arabidopsis thaliana OX=3702 GN=SCPL40 PE=2 SV=2)	PF00450.19(Peptidase_S10:Serine carboxypeptidase)
Glyur000837s00027488	4.61745	1.16e-12	1.2e-10	yes	up	0.0766667	1.40333	0.13	0.04	0.06	1.05	1.44	1.72	Glyur000837s00027488	GO:0005737(cellular_component:cytoplasm); GO:0008757(molecular_function:S-adenosylmethionine-dependent methyltransferase activity); GO:0032259(biological_process:methylation); GO:0055114(biological_process:oxidation-reduction process); GO:0016491(molecular_function:oxidoreductase activity)	K00574	cfa		COG2907(S:Function unknown)	XP_012569842.1(PREDICTED: uncharacterized protein LOC101501999 isoform X1 [Cicer arietinum])	sp|O53732|UFAA1_MYCTU(Tuberculostearic acid methyltransferase UfaA1 OS=Mycobacterium tuberculosis (strain ATCC 25618 / H37Rv) OX=83332 GN=ufaA1 PE=1 SV=3)	PF02353.17(CMAS:Mycolic acid cyclopropane synthetase); PF01593.21(Amino_oxidase:Flavin containing amine oxidoreductase); PF13450.3(NAD_binding_8:NAD(P)-binding Rossmann-like domain); PF01266.21(DAO:FAD dependent oxidoreductase); PF00890.21(FAD_binding_2:FAD binding domain); PF13489.3(Methyltransf_23:Methyltransferase domain); PF13649.3(Methyltransf_25:Methyltransferase domain); PF12831.4(FAD_oxid…
Glyur000083s00006936	6.18312	1.2e-12	1.23e-10	yes	up	0.0333333	1.98333	0	0.01	0.09	2.7	1.9	1.35	Glyur000083s00006936	GO:0008017(molecular_function:microtubule binding); GO:0007018(biological_process:microtubule-based movement); GO:0003777(molecular_function:microtubule motor activity); GO:0005524(molecular_function:ATP binding)	K10406	KIFC2_3		COG5059(Z:Cytoskeleton)	XP_013450471.2(kinesin-like protein KIN-14G [Medicago truncatula])	sp|F4IL57|KN14I_ARATH(Kinesin-like protein KIN-14I OS=Arabidopsis thaliana OX=3702 GN=KIN14I PE=2 SV=1)	PF00225.20(Kinesin:Kinesin motor domain); PF16796.2(Microtub_bd:Microtubule binding); PF00307.28(CH:Calponin homology (CH) domain)
Glyur000151s00010724	-1.16884	1.25e-12	1.28e-10	yes	down	88.88	30.0633	101.17	69.66	95.81	24.53	32.9	32.76	Glyur000151s00010724	GO:0097159(molecular_function:organic cyclic compound binding); GO:1901363(molecular_function:heterocyclic compound binding)				ENOG410YEFI(S:Function unknown)	XP_020202903.1(nucleolin-like isoform X1 [Cajanus cajan])	sp|O43390|HNRPR_HUMAN(Heterogeneous nuclear ribonucleoprotein R OS=Homo sapiens OX=9606 GN=HNRNPR PE=1 SV=1)	PF00076.19(RRM_1:RNA recognition motif. (a.k.a. RRM, RBD, or RNP domain))
Glyur001081s00024631	5.31832	1.32e-12	1.35e-10	yes	up	0.0633333	1.89333	0.08	0.02	0.09	0.99	2.5	2.19	Glyur001081s00024631					COG4886(E:Amino acid transport and metabolism); ENOG41114PR(U:Intracellular trafficking, secretion, and vesicular transport); ENOG410ZS7Y(U:Intracellular trafficking, secretion, and vesicular transport)	AET01361.2(NB-ARC domain disease resistance protein [Medicago truncatula])	sp|Q7XA42|RGA1_SOLBU(Putative disease resistance protein RGA1 OS=Solanum bulbocastanum OX=147425 GN=RGA1 PE=2 SV=2)	PF00931.19(NB-ARC:NB-ARC domain); PF13191.3(AAA_16:AAA ATPase domain); PF13401.3(AAA_22:AAA domain)
Glyur000212s00017512	1.67571	1.36e-12	1.39e-10	yes	up	2.89667	6.99667	2.9	2.9	2.89	6.5	6.49	8	Glyur000212s00017512	GO:0006468(biological_process:protein phosphorylation); GO:0016310(biological_process:phosphorylation); GO:0016021(cellular_component:integral component of membrane); GO:0016020(cellular_component:membrane); GO:0000166(molecular_function:nucleotide binding); GO:0004674(molecular_function:protein serine/threonine kinase activity); GO:0004672(molecular_function:protein kinase activity); GO:0010102(…				COG4886(K:Transcription); COG0515(K:Transcription)	XP_006573682.1(PREDICTED: LRR receptor-like serine/threonine-protein kinase HSL2 [Glycine max])	sp|C0LGX3|HSL2_ARATH(LRR receptor-like serine/threonine-protein kinase HSL2 OS=Arabidopsis thaliana OX=3702 GN=HSL2 PE=2 SV=1)	PF00069.22(Pkinase:Protein kinase domain); PF07714.14(Pkinase_Tyr:Protein tyrosine kinase); PF13855.3(LRR_8:Leucine rich repeat); PF12799.4(LRR_4:Leucine Rich repeats (2 copies)); PF08263.9(LRRNT_2:Leucine rich repeat N-terminal domain)
Glyur000225s00014719	4.0929	1.4e-12	1.41e-10	yes	up	0.576667	13.5633	0.63	0.76	0.34	11.9	12.94	15.85	Glyur000225s00014719	GO:0005737(cellular_component:cytoplasm); GO:0046916(biological_process:cellular transition metal ion homeostasis); GO:0046872(molecular_function:metal ion binding); GO:0030001(biological_process:metal ion transport); GO:0046914(molecular_function:transition metal ion binding)				COG2608(S:Function unknown)	KYP36522.1(hypothetical protein KK1_042362, partial [Cajanus cajan])	sp|Q9FLU5|HIP9_ARATH(Heavy metal-associated isoprenylated plant protein 9 OS=Arabidopsis thaliana OX=3702 GN=HIPP09 PE=2 SV=1)	PF00403.23(HMA:Heavy-metal-associated domain)
Glyur000007s00002846	3.16814	1.42e-12	1.43e-10	yes	up	0.27	1.78	0.28	0.16	0.37	1.89	1.71	1.74	Glyur000007s00002846	GO:0008574(molecular_function:ATP-dependent microtubule motor activity, plus-end-directed); GO:0008017(molecular_function:microtubule binding); GO:0007018(biological_process:microtubule-based movement); GO:0005524(molecular_function:ATP binding); GO:0005871(cellular_component:kinesin complex); GO:0003777(molecular_function:microtubule motor activity)	K10398	KIF11, EG5		COG5059(S:Function unknown)	XP_003625856.1(kinesin-like protein KIN-5C [Medicago truncatula])	sp|O23826|KN5C_TOBAC(Kinesin-like protein KIN-5C OS=Nicotiana tabacum OX=4097 GN=KIN5C PE=1 SV=1)	PF00225.20(Kinesin:Kinesin motor domain); PF16796.2(Microtub_bd:Microtubule binding)
Glyur000153s00013692	4.53398	1.44e-12	1.44e-10	yes	up	0.543333	8.08333	0.16	0.33	1.14	7.48	6.7	10.07	Glyur000153s00013692					ENOG410YK7R(K:Transcription)	XP_014624893.1(PREDICTED: putative B3 domain-containing protein At5g58280 isoform X2 [Glycine max])	sp|Q9FHB2|Y5828_ARATH(Putative B3 domain-containing protein At5g58280 OS=Arabidopsis thaliana OX=3702 GN=At5g58280 PE=3 SV=1)	PF02362.18(B3:B3 DNA binding domain)
Glyur001258s00037325	3.41716	1.57e-12	1.57e-10	yes	up	4.79667	38.63	3.15	5.75	5.49	54.93	37.68	23.28	Glyur001258s00037325	GO:0016787(molecular_function:hydrolase activity); GO:0008152(biological_process:metabolic process)	K07025	K07025		COG1011(S:Function unknown)	GAU28039.1(hypothetical protein TSUD_264970 [Trifolium subterraneum])	sp|Q09893|YAI5_SCHPO(Uncharacterized protein C24B11.05 OS=Schizosaccharomyces pombe (strain 972 / ATCC 24843) OX=284812 GN=SPAC24B11.05 PE=3 SV=1)
Glyur000107s00007222	2.52648	1.67e-12	1.66e-10	yes	up	2.50667	10.8567	2.05	2.16	3.31	9.7	10.37	12.5	Glyur000107s00007222	GO:0016021(cellular_component:integral component of membrane)				ENOG4111TFU(S:Function unknown)	XP_004501432.1(PREDICTED: uncharacterized protein LOC101501292 [Cicer arietinum])
Glyur000004s00000385	1.84345	1.72e-12	1.7e-10	yes	up	18.84	51.5067	16.53	20.98	19.01	48.03	48.55	57.94	Glyur000004s00000385	GO:0046835(biological_process:carbohydrate phosphorylation); GO:0004747(molecular_function:ribokinase activity); GO:0006014(biological_process:D-ribose metabolic process)	K00847	E2.7.1.4, scrK	map00520(Amino sugar and nucleotide sugar metabolism); map00500(Starch and sucrose metabolism); map00051(Fructose and mannose metabolism)	COG0524(S:Function unknown)	XP_020223313.1(fructokinase-2 [Cajanus cajan])	sp|Q42896|SCRK2_SOLLC(Fructokinase-2 OS=Solanum lycopersicum OX=4081 GN=FRK2 PE=2 SV=2)	PF00294.21(PfkB:pfkB family carbohydrate kinase)
Glyur000021s00002688	4.36206	1.75e-12	1.72e-10	yes	up	0.81	12.6467	1.82	0.06	0.55	18.13	9.93	9.88	Glyur000021s00002688					COG0515(S:Function unknown)	KEH18248.1(receptor-like kinase [Medicago truncatula])	sp|Q9LIG2|RLK6_ARATH(Receptor-like protein kinase At3g21340 OS=Arabidopsis thaliana OX=3702 GN=At3g21340 PE=1 SV=1)	PF12819.4(Malectin_like:Carbohydrate-binding protein of the ER); PF00069.22(Pkinase:Protein kinase domain); PF07714.14(Pkinase_Tyr:Protein tyrosine kinase); PF13855.3(LRR_8:Leucine rich repeat); PF12799.4(LRR_4:Leucine Rich repeats (2 copies)); PF11721.5(Malectin:Di-glucose binding within endoplasmic reticulum)
Glyur000408s00029658	9.20349	1.84e-12	1.81e-10	yes	up	0.0233333	5.59333	0	0	0.07	4.76	3.57	8.45	Glyur000408s00029658					ENOG410ZKCS(S:Function unknown); ENOG410YIDM(S:Function unknown); ENOG4111CHW(S:Function unknown)	XP_017438249.1(PREDICTED: UPF0481 protein At3g47200-like [Vigna angularis])	sp|Q9SD53|Y3720_ARATH(UPF0481 protein At3g47200 OS=Arabidopsis thaliana OX=3702 GN=At3g47200 PE=2 SV=1)	PF03140.12(DUF247:Plant protein of unknown function)
Glyur006769s00047931	5.71615	1.85e-12	1.81e-10	yes	up	2.95333	116.91	0	5.7	3.16	152.94	132.37	65.42	Glyur006769s00047931	GO:0006508(biological_process:proteolysis)				ENOG410ZCRC(O:Posttranslational modification, protein turnover, chaperones)	KHM99387.1(Seed trypsin/chymotrypsin inhibitor TI5-72 [Glycine soja])	sp|P16346|IBBWT_MEDSA(Bowman-Birk type wound-induced trypsin inhibitor OS=Medicago sativa OX=3879 PE=1 SV=1)	PF00228.17(Bowman-Birk_leg:Bowman-Birk serine protease inhibitor family)
Glyur000170s00011015	1.95892	1.9e-12	1.84e-10	yes	up	31.6567	91.6067	28.32	31.66	34.99	105.55	88.56	80.71	Glyur000170s00011015	GO:0004150(molecular_function:dihydroneopterin aldolase activity); GO:0046654(biological_process:tetrahydrofolate biosynthetic process); GO:0046656(biological_process:folic acid biosynthetic process)	K01633	folB	map00790(Folate biosynthesis)	COG1539(H:Coenzyme transport and metabolism)	KHN22592.1(Dihydroneopterin aldolase [Glycine soja])	sp|Q9SF23|FOLB1_ARATH(Dihydroneopterin aldolase 1 OS=Arabidopsis thaliana OX=3702 GN=FOLB1 PE=1 SV=1)	PF02152.15(FolB:Dihydroneopterin aldolase)
Glyur000159s00010283	4.89128	1.95e-12	1.89e-10	yes	up	2.25	49.9667	1.18	2.5	3.07	91.42	37.6	20.88	Glyur000159s00010283					ENOG410Z2HZ(S:Function unknown); ENOG41106RD(S:Function unknown)	XP_019459009.1(PREDICTED: uncharacterized protein LOC109358952 [Lupinus angustifolius])
Glyur001402s00032148	2.90879	2e-12	1.93e-10	yes	up	0.406667	2.24667	0.56	0.39	0.27	2.44	2	2.3	Glyur001402s00032148	GO:0008574(molecular_function:ATP-dependent microtubule motor activity, plus-end-directed); GO:0008017(molecular_function:microtubule binding); GO:0007018(biological_process:microtubule-based movement); GO:0005524(molecular_function:ATP binding); GO:0005871(cellular_component:kinesin complex); GO:0003777(molecular_function:microtubule motor activity)	K10398	KIF11, EG5		COG5059(Z:Cytoskeleton)	XP_004494989.1(PREDICTED: 125 kDa kinesin-related protein [Cicer arietinum])	sp|Q0WQJ7|KN5B_ARATH(Kinesin-like protein KIN-5B OS=Arabidopsis thaliana OX=3702 GN=KIN5B PE=2 SV=1)	PF00225.20(Kinesin:Kinesin motor domain); PF16796.2(Microtub_bd:Microtubule binding)
Glyur000066s00006236	3.96577	2.26e-12	2.16e-10	yes	up	0.6	7.49333	0.34	1.11	0.35	7.3	7.22	7.96	Glyur000066s00006236	GO:0005773(cellular_component:vacuole); GO:0005618(cellular_component:cell wall); GO:0005975(biological_process:carbohydrate metabolic process); GO:0030246(molecular_function:carbohydrate binding); GO:0004565(molecular_function:beta-galactosidase activity)				COG1874(T:Signal transduction mechanisms)	XP_020240225.1(beta-galactosidase 8-like [Cajanus cajan])	sp|Q9SCV4|BGAL8_ARATH(Beta-galactosidase 8 OS=Arabidopsis thaliana OX=3702 GN=BGAL8 PE=2 SV=2)	PF01301.16(Glyco_hydro_35:Glycosyl hydrolases family 35); PF02140.15(Gal_Lectin:Galactose binding lectin domain); PF02449.12(Glyco_hydro_42:Beta-galactosidase); PF02837.15(Glyco_hydro_2_N:Glycosyl hydrolases family 2, sugar binding domain)
Glyur007403s00047386	5.09471	2.31e-12	2.2e-10	yes	up	3.46	86.7533	2.2	6.34	1.84	145.45	77.05	37.76	Glyur007403s00047386	GO:0046983(molecular_function:protein dimerization activity); GO:0008171(molecular_function:O-methyltransferase activity); GO:0032259(biological_process:methylation)				ENOG410XS7T(S:Function unknown)	XP_003601618.1(acetylserotonin O-methyltransferase [Medicago truncatula])	sp|Q9T003|ASMT_ARATH(Acetylserotonin O-methyltransferase OS=Arabidopsis thaliana OX=3702 GN=ASMT PE=1 SV=1)	PF00891.15(Methyltransf_2:O-methyltransferase)
Glyur001919s00031510	-1.34449	2.37e-12	2.25e-10	yes	down	16.0333	4.81333	19.38	12.99	15.73	4.39	5.56	4.49	Glyur001919s00031510	GO:0003676(molecular_function:nucleic acid binding)	K11593	ELF2C, AGO		ENOG410XP07(S:Function unknown)	XP_006574922.1(PREDICTED: protein argonaute 7-like isoform X3 [Glycine max])	sp|Q9C793|AGO7_ARATH(Protein argonaute 7 OS=Arabidopsis thaliana OX=3702 GN=AGO7 PE=2 SV=1)	PF02171.14(Piwi:Piwi domain); PF16486.2(ArgoN:N-terminal domain of argonaute); PF02170.19(PAZ:PAZ domain); PF08699.7(ArgoL1:Argonaute linker 1 domain); PF16488.2(ArgoL2:Argonaute linker 2 domain); PF16487.2(ArgoMid:Mid domain of argonaute)
Glyur004199s00038361	4.23663	2.38e-12	2.25e-10	yes	up	4.95667	86.2533	1.93	9.17	3.77	138.99	79.64	40.13	Glyur004199s00038361	GO:0016620(molecular_function:oxidoreductase activity, acting on the aldehyde or oxo group of donors, NAD or NADP as acceptor); GO:0055114(biological_process:oxidation-reduction process); GO:0004029(molecular_function:aldehyde dehydrogenase (NAD) activity)	K12355	REF1	map00940(Phenylpropanoid biosynthesis)	COG1012(C:Energy production and conversion)	XP_020221618.1(aldehyde dehydrogenase family 2 member C4-like [Cajanus cajan])	sp|Q56YU0|AL2C4_ARATH(Aldehyde dehydrogenase family 2 member C4 OS=Arabidopsis thaliana OX=3702 GN=ALDH2C4 PE=1 SV=2)	PF00171.19(Aldedh:Aldehyde dehydrogenase family)
Glyur000034s00002909	-4.11437	2.41e-12	2.27e-10	yes	down	8.04	0.38	12.66	3.83	7.63	0.17	0.65	0.32	Glyur000034s00002909	GO:0005634(cellular_component:nucleus); GO:0006355(biological_process:regulation of transcription, DNA-templated); GO:0005488(molecular_function:binding); GO:0003677(molecular_function:DNA binding); GO:0046983(molecular_function:protein dimerization activity); GO:0006351(biological_process:transcription, DNA-templated)				COG5068(K:Transcription)	XP_004496032.1(PREDICTED: agamous-like MADS-box protein AGL80 [Cicer arietinum])	sp|Q9FJK3|AGL80_ARATH(Agamous-like MADS-box protein AGL80 OS=Arabidopsis thaliana OX=3702 GN=AGL80 PE=1 SV=1)	PF00319.15(SRF-TF:SRF-type transcription factor (DNA-binding and dimerisation domain))
Glyur000306s00014009	2.91323	2.48e-12	2.33e-10	yes	up	4.31667	24.2233	3.95	5.36	3.64	29.51	22.1	21.06	Glyur000306s00014009	GO:0003824(molecular_function:catalytic activity); GO:0016853(molecular_function:isomerase activity); GO:0008152(biological_process:metabolic process)				ENOG410YFAM(S:Function unknown)	XP_003552689.1(PREDICTED: enoyl-CoA delta isomerase 1, peroxisomal [Glycine max])	sp|O04469|ECI1_ARATH(Enoyl-CoA delta isomerase 1, peroxisomal OS=Arabidopsis thaliana OX=3702 GN=ECI1 PE=1 SV=1)	PF00378.17(ECH_1:Enoyl-CoA hydratase/isomerase)
Glyur000710s00027832	2.65813	2.57e-12	2.4e-10	yes	up	6.13	27.7967	9.43	4.18	4.78	35.59	24.66	23.14	Glyur000710s00027832	GO:0016747(molecular_function:transferase activity, transferring acyl groups other than amino-acyl groups)	K13065	E2.3.1.133, HCT	map00941(Flavonoid biosynthesis); map00940(Phenylpropanoid biosynthesis); map00945(Stilbenoid, diarylheptanoid and gingerol biosynthesis)	ENOG410XPQ7(S:Function unknown); ENOG410YJ90(S:Function unknown)	AHK05938.1(hydroxycinnamoyl-CoA shikimate/quinate hydroxycinnamoyl transferase [Caragana korshinskii])	sp|Q8GSM7|HST_TOBAC(Shikimate O-hydroxycinnamoyltransferase OS=Nicotiana tabacum OX=4097 GN=HST PE=1 SV=1)	PF02458.12(Transferase:Transferase family)
Glyur000022s00002050	-2.02397	2.7e-12	2.51e-10	yes	down	12.6567	2.39333	12.42	13.79	11.76	1.69	2.74	2.75	Glyur000022s00002050					ENOG410YN7N(S:Function unknown)	XP_004505416.1(PREDICTED: cyclic dof factor 1 [Cicer arietinum])	sp|Q8LFV3|CDF3_ARATH(Cyclic dof factor 3 OS=Arabidopsis thaliana OX=3702 GN=CDF3 PE=1 SV=2)	PF02701.12(zf-Dof:Dof domain, zinc finger)
Glyur000014s00002488	1.0898	2.84e-12	2.63e-10	yes	up	23.1433	37.0067	27.21	19.73	22.49	36.47	38.7	35.85	Glyur000014s00002488	GO:0004802(molecular_function:transketolase activity); GO:0008152(biological_process:metabolic process)	K00615	E2.2.1.1, tktA, tktB	map00030(Pentose phosphate pathway); map01051(Biosynthesis of ansamycins); map00710(Carbon fixation in photosynthetic organisms)	COG0021(G:Carbohydrate transport and metabolism)	XP_020211088.1(transketolase, chloroplastic [Cajanus cajan])	sp|Q7SIC9|TKTC_MAIZE(Transketolase, chloroplastic OS=Zea mays OX=4577 PE=1 SV=1)	PF00456.18(Transketolase_N:Transketolase, thiamine diphosphate binding domain); PF02779.21(Transket_pyr:Transketolase, pyrimidine binding domain); PF02780.17(Transketolase_C:Transketolase, C-terminal domain)
Glyur000121s00009707	2.71988	2.88e-12	2.65e-10	yes	up	23.0567	116.753	18.6	32.51	18.06	133.72	120.01	96.53	Glyur000121s00009707	GO:0080044(molecular_function:quercetin 7-O-glucosyltransferase activity); GO:0043231(cellular_component:intracellular membrane-bounded organelle); GO:0052696(biological_process:flavonoid glucuronidation); GO:0009813(biological_process:flavonoid biosynthetic process); GO:0080043(molecular_function:quercetin 3-O-glucosyltransferase activity); GO:0008152(biological_process:metabolic process); GO:00…	K08237	E2.4.1.218		COG1819(S:Function unknown)	XP_004494807.1(PREDICTED: hydroquinone glucosyltransferase-like [Cicer arietinum])	sp|Q9AR73|HQGT_RAUSE(Hydroquinone glucosyltransferase OS=Rauvolfia serpentina OX=4060 GN=AS PE=1 SV=1)	PF00201.15(UDPGT:UDP-glucoronosyl and UDP-glucosyl transferase)
Glyur000159s00010249	2.79129	2.96e-12	2.71e-10	yes	up	1.59667	8.58333	2.32	1.24	1.23	7.67	8.12	9.96	Glyur000159s00010249	GO:0016787(molecular_function:hydrolase activity)				ENOG4111JYH(D:Cell cycle control, cell division, chromosome partitioning); ENOG4111JYH(T:Signal transduction mechanisms); ENOG4111JYH(Z:Cytoskeleton); COG5126(D:Cell cycle control, cell division, chromosome partitioning); COG5126(T:Signal transduction mechanisms); COG5126(Z:Cytoskeleton)	XP_012569223.1(PREDICTED: dihydrofolate reductase-like [Cicer arietinum])	sp|Q3SZ07|OVCA2_BOVIN(Esterase OVCA2 OS=Bos taurus OX=9913 GN=OVCA2 PE=2 SV=1)	PF03959.10(FSH1:Serine hydrolase (FSH1))
Glyur000330s00019523	3.43655	3.03e-12	2.77e-10	yes	up	5.02333	27.9733	6.76	4.78	3.53	17.62	28.38	37.92	Glyur000330s00019523					ENOG410YXYH(S:Function unknown); ENOG410YSXZ(S:Function unknown)	XP_020202764.1(gibberellin-regulated protein 14 [Cajanus cajan])	sp|Q9LFR3|GASAE_ARATH(Gibberellin-regulated protein 14 OS=Arabidopsis thaliana OX=3702 GN=GASA14 PE=1 SV=1)	PF02704.11(GASA:Gibberellin regulated protein)
Glyur000028s00003552	-2.12118	3.35e-12	3.05e-10	yes	down	143.29	24.5567	191.66	109.48	128.73	20.78	35.2	17.69	Glyur000028s00003552	GO:0022857(molecular_function:transmembrane transporter activity); GO:0016021(cellular_component:integral component of membrane); GO:0055085(biological_process:transmembrane transport); GO:0005886(cellular_component:plasma membrane)				ENOG410YAV4(S:Function unknown)	KHN22214.1(Auxin-induced protein 5NG4 [Glycine soja])	sp|Q94AP3|WAT1_ARATH(Protein WALLS ARE THIN 1 OS=Arabidopsis thaliana OX=3702 GN=WAT1 PE=1 SV=1)	PF00892.17(EamA:EamA-like transporter family)
Glyur000055s00004574	1.79137	3.44e-12	3.12e-10	yes	up	29.24	74.3533	33.94	27.7	26.08	84.85	67.94	70.27	Glyur000055s00004574	GO:0006633(biological_process:fatty acid biosynthetic process); GO:0031177(molecular_function:phosphopantetheine binding)				COG0236(I:Lipid transport and metabolism)	GAU11100.1(hypothetical protein TSUD_197240 [Trifolium subterraneum])	sp|P93092|ACP1_CASGL(Acyl carrier protein 1, chloroplastic OS=Casuarina glauca OX=3522 GN=ACP1 PE=2 SV=1)	PF00550.22(PP-binding:Phosphopantetheine attachment site); PF14573.3(PP-binding_2:Acyl-carrier)
Glyur000735s00021569	2.4472	3.71e-12	3.35e-10	yes	up	3.79667	16.7767	2.9	5	3.49	17.29	16.9	16.14	Glyur000735s00021569		K18342	OTUD6		ENOG41121DS(L:Replication, recombination and repair); COG5539(L:Replication, recombination and repair); ENOG4111GZF(L:Replication, recombination and repair)	XP_004496177.1(PREDICTED: OTU domain-containing protein At3g57810-like [Cicer arietinum])	sp|Q8LBZ4|OTU_ARATH(OTU domain-containing protein At3g57810 OS=Arabidopsis thaliana OX=3702 GN=At3g57810 PE=2 SV=1)	PF02338.16(OTU:OTU-like cysteine protease)
Glyur001271s00028146	2.33913	4.12e-12	3.7e-10	yes	up	14.3067	55.87	10.88	18.11	13.93	48.9	52.23	66.48	Glyur001271s00028146	GO:0009941(cellular_component:chloroplast envelope); GO:0004497(molecular_function:monooxygenase activity); GO:0016125(biological_process:sterol metabolic process); GO:0020037(molecular_function:heme binding); GO:0016829(molecular_function:lyase activity); GO:0016705(molecular_function:oxidoreductase activity, acting on paired donors, with incorporation or reduction of molecular oxygen); GO:00055…	K10528	HPL	map00592(alpha-Linolenic acid metabolism)	ENOG410YEK3(Q:Secondary metabolites biosynthesis, transport and catabolism)	BAJ78217.1(13-hydroperoxide lyase [Lotus japonicus])	sp|Q9ZSY9|C74B2_ARATH(Linolenate hydroperoxide lyase, chloroplastic OS=Arabidopsis thaliana OX=3702 GN=CYP74B2 PE=1 SV=1)	PF00067.19(p450:Cytochrome P450)
Glyur001017s00031780	3.48961	4.88e-12	4.37e-10	yes	up	0.243333	2	0.28	0.17	0.28	1.96	1.6	2.44	Glyur001017s00031780	GO:0015630(cellular_component:microtubule cytoskeleton); GO:0097159(molecular_function:organic cyclic compound binding); GO:0017111(molecular_function:nucleoside-triphosphatase activity); GO:0044430(cellular_component:cytoskeletal part); GO:0005488(molecular_function:binding); GO:1901363(molecular_function:heterocyclic compound binding)	K10403	KIF22	map04914(Progesterone-mediated oocyte maturation)	COG5059(S:Function unknown)	XP_020217315.1(kinesin-like protein KIN-10C isoform X2 [Cajanus cajan])	sp|F4KEC6|KN10C_ARATH(Kinesin-like protein KIN-10C OS=Arabidopsis thaliana OX=3702 GN=KIN10C PE=2 SV=1)	PF00225.20(Kinesin:Kinesin motor domain); PF16796.2(Microtub_bd:Microtubule binding)
Glyur001958s00032473	4.72229	4.93e-12	4.39e-10	yes	up	0.753333	13.9167	1.55	0.35	0.36	14.91	11.32	15.52	Glyur001958s00032473					ENOG4111D7M(S:Function unknown)	XP_020213953.1(uncharacterized protein LOC109798133 [Cajanus cajan])
Glyur000069s00004081	1.8942	4.94e-12	4.39e-10	yes	up	4.39	12.5533	4.34	4.25	4.58	14.45	11.75	11.46	Glyur000069s00004081	GO:0005737(cellular_component:cytoplasm); GO:0016773(molecular_function:phosphotransferase activity, alcohol group as acceptor); GO:0016301(molecular_function:kinase activity); GO:0044237(biological_process:cellular metabolic process); GO:0000166(molecular_function:nucleotide binding)	K00869	E2.7.1.36, MVK, mvaK1	map04146(Peroxisome); map00900(Terpenoid backbone biosynthesis)	COG1577(I:Lipid transport and metabolism); COG1028(S:Function unknown)	AID51439.1(mevalonate kinase [Astragalus membranaceus])	sp|P46086|KIME_ARATH(Mevalonate kinase OS=Arabidopsis thaliana OX=3702 GN=At5g27450 PE=2 SV=1)	PF00288.23(GHMP_kinases_N:GHMP kinases N terminal domain); PF08544.10(GHMP_kinases_C:GHMP kinases C terminal)
Glyur000122s00010173	3.43252	5.09e-12	4.5e-10	yes	up	0.556667	4.54	0.31	0.85	0.51	4.39	4.3	4.93	Glyur000122s00010173	GO:0008017(molecular_function:microtubule binding); GO:0007018(biological_process:microtubule-based movement); GO:0000166(molecular_function:nucleotide binding); GO:0003777(molecular_function:microtubule motor activity); GO:0016887(molecular_function:ATPase activity); GO:0005871(cellular_component:kinesin complex); GO:0005874(cellular_component:microtubule); GO:0005524(molecular_function:ATP bind…	K10405	KIFC1		COG5059(K:Transcription)	XP_003545783.1(PREDICTED: kinesin-1-like [Glycine max])	sp|F4JGP4|KN14D_ARATH(Kinesin-like protein KIN-14D OS=Arabidopsis thaliana OX=3702 GN=KIN14D PE=2 SV=1)	PF00225.20(Kinesin:Kinesin motor domain); PF16796.2(Microtub_bd:Microtubule binding)
Glyur000125s00010038	3.58807	5.49e-12	4.84e-10	yes	up	0.91	8.7	0.4	1.01	1.32	6.71	8.31	11.08	Glyur000125s00010038	GO:0046658(cellular_component:anchored component of plasma membrane); GO:0030247(molecular_function:polysaccharide binding); GO:0005975(biological_process:carbohydrate metabolic process); GO:0004553(molecular_function:hydrolase activity, hydrolyzing O-glycosyl compounds)	K19892	GN4	map00500(Starch and sucrose metabolism)	ENOG410YASF(G:Carbohydrate transport and metabolism)	KHN12071.1(Glucan endo-1,3-beta-glucosidase 4, partial [Glycine soja])	sp|Q94CD8|E134_ARATH(Glucan endo-1,3-beta-glucosidase 4 OS=Arabidopsis thaliana OX=3702 GN=At3g13560 PE=1 SV=1)	PF00332.15(Glyco_hydro_17:Glycosyl hydrolases family 17); PF07983.10(X8:X8 domain)
Glyur000259s00016765	4.1727	5.97e-12	5.24e-10	yes	up	71.0033	907.347	20.27	116.3	76.44	966.94	825.21	929.89	Glyur000259s00016765	GO:0016020(cellular_component:membrane)				ENOG4111SSC(S:Function unknown)	AFK35999.1(unknown [Medicago truncatula])	sp|Q54SW1|Y2179_DICDI(Putative phosphatidylglycerol/phosphatidylinositol transfer protein DDB_G0282179 OS=Dictyostelium discoideum OX=44689 GN=DDB_G0282179 PE=3 SV=2)	PF02221.12(E1_DerP2_DerF2:ML domain)
Glyur000307s00023018	4.98756	6.31e-12	5.52e-10	yes	up	0.356667	9.1	0.2	0.59	0.28	4	6.51	16.79	Glyur000307s00023018	GO:0005618(cellular_component:cell wall); GO:0016020(cellular_component:membrane); GO:0005576(cellular_component:extracellular region); GO:0009664(biological_process:plant-type cell wall organization)				ENOG410YCCE(G:Carbohydrate transport and metabolism)	PNX74596.1(expansin-a13-like protein, partial [Trifolium pratense])	sp|Q9M9P0|EXP13_ARATH(Expansin-A13 OS=Arabidopsis thaliana OX=3702 GN=EXPA13 PE=2 SV=2)	PF01357.18(Pollen_allerg_1:Pollen allergen); PF03330.15(DPBB_1:Lytic transglycolase)
Glyur000200s00011165	3.02154	6.69e-12	5.82e-10	yes	up	0.53	3.17	0.74	0.25	0.6	2.56	3.51	3.44	Glyur000200s00011165	GO:0016787(molecular_function:hydrolase activity); GO:0016021(cellular_component:integral component of membrane); GO:0016884(molecular_function:carbon-nitrogen ligase activity, with glutamine as amido-N-donor)				COG0154(S:Function unknown)	XP_004503894.1(PREDICTED: fatty acid amide hydrolase-like isoform X2 [Cicer arietinum])	sp|Q7XJJ7|FAAH_ARATH(Fatty acid amide hydrolase OS=Arabidopsis thaliana OX=3702 GN=FAAH PE=1 SV=1)	PF01425.18(Amidase:Amidase)
Glyur001895s00033540	-1.5803	6.71e-12	5.82e-10	yes	down	45.5533	11.39	56.95	32.2	47.51	9.08	14.09	11	Glyur001895s00033540	GO:0003723(molecular_function:RNA binding)	K14945	QKI		COG5176(T:Signal transduction mechanisms)	XP_016195677.1(KH domain-containing protein At2g38610 isoform X2 [Arachis ipaensis])	sp|Q9ZVI3|QKIL3_ARATH(KH domain-containing protein At2g38610 OS=Arabidopsis thaliana OX=3702 GN=At2g38610 PE=1 SV=1)	PF16544.2(STAR_dimer:Homodimerisation region of STAR domain protein); PF00013.26(KH_1:KH domain)
Glyur005494s00046723	2.45789	7.51e-12	6.49e-10	yes	up	5.91	24.9233	5.37	6.91	5.45	16.57	25.5	32.7	Glyur005494s00046723		K09422	MYBP		COG5147(K:Transcription)	XP_014491519.1(transcription factor MYB8 [Vigna radiata var. radiata])	sp|P81393|MYB08_ANTMA(Myb-related protein 308 OS=Antirrhinum majus OX=4151 GN=MYB308 PE=2 SV=1)	PF00249.28(Myb_DNA-binding:Myb-like DNA-binding domain); PF13921.3(Myb_DNA-bind_6:Myb-like DNA-binding domain)
Glyur000130s00006909	1.84831	7.64e-12	6.57e-10	yes	up	3.85667	10.2933	4.85	2.85	3.87	9.13	10.43	11.32	Glyur000130s00006909	GO:0016021(cellular_component:integral component of membrane); GO:0016020(cellular_component:membrane)				ENOG410ZGFF(S:Function unknown)	XP_004489235.1(PREDICTED: altered inheritance of mitochondria protein 32 [Cicer arietinum])	sp|A5DK49|AIM32_PICGU(Altered inheritance of mitochondria protein 32 OS=Meyerozyma guilliermondii (strain ATCC 6260 / CBS 566 / DSM 6381 / JCM 1539 / NBRC 10279 / NRRL Y-324) OX=294746 GN=AIM32 PE=3 SV=2)	PF06999.9(Suc_Fer-like:Sucrase/ferredoxin-like)
Glyur000610s00022581	4.13191	8.83e-12	7.57e-10	yes	up	0.816667	10.69	0.7	1.1	0.65	11.06	8.76	12.25	Glyur000610s00022581	GO:0006342(biological_process:chromatin silencing); GO:0005634(cellular_component:nucleus); GO:0000786(cellular_component:nucleosome); GO:0000790(cellular_component:nuclear chromatin); GO:0003677(molecular_function:DNA binding); GO:0046982(molecular_function:protein heterodimerization activity)	K11251	H2A	map05034(Alcoholism); map05322(Systemic lupus erythematosus); map04217(Necroptosis)	COG5262(B:Chromatin structure and dynamics); COG5126(D:Cell cycle control, cell division, chromosome partitioning); COG5126(T:Signal transduction mechanisms); COG5126(Z:Cytoskeleton)	XP_020233833.1(histone H2A variant 1 [Cajanus cajan])	sp|Q84MP7|H2AV3_ORYSJ(Probable histone H2A variant 3 OS=Oryza sativa subsp. japonica OX=39947 GN=Os03g0743400 PE=2 SV=1)	PF00125.21(Histone:Core histone H2A/H2B/H3/H4); PF16211.2(Histone_H2A_C:C-terminus of histone H2A)
Glyur000417s00031387	3.12826	9e-12	7.68e-10	yes	up	0.716667	4.15333	0.6	0.45	1.1	4.39	4.44	3.63	Glyur000417s00031387	GO:0016758(molecular_function:transferase activity, transferring hexosyl groups); GO:0008152(biological_process:metabolic process)				COG1819(S:Function unknown)	XP_023875938.1(UDP-glycosyltransferase 88A1-like [Quercus suber])	sp|Q6VAA7|U88B1_STERE(UDP-glycosyltransferase 88B1 OS=Stevia rebaudiana OX=55670 GN=UGT88B1 PE=2 SV=1)	PF00201.15(UDPGT:UDP-glucoronosyl and UDP-glucosyl transferase)
Glyur000287s00022137	-1.42196	9.4e-12	7.99e-10	yes	down	35.03	10.05	38.06	32.73	34.3	7.25	10.91	11.99	Glyur000287s00022137	GO:0019898(cellular_component:extrinsic component of membrane); GO:0045053(biological_process:protein retention in Golgi apparatus); GO:0005622(cellular_component:intracellular); GO:0006623(biological_process:protein targeting to vacuole)				COG5043(U:Intracellular trafficking, secretion, and vesicular transport); ENOG41116J3(S:Function unknown)	XP_020213358.1(uncharacterized protein LOC109797630 [Cajanus cajan])	sp|Q54KX3|VP13F_DICDI(Putative vacuolar protein sorting-associated protein 13F OS=Dictyostelium discoideum OX=44689 GN=vps13F PE=3 SV=1)	PF16909.2(VPS13_C:Vacuolar-sorting-associated 13 protein C-terminal); PF16908.2(VPS13:Vacuolar sorting-associated protein 13, N-terminal); PF06650.9(SHR-BD:SHR-binding domain of vacuolar-sorting associated protein 13); PF12624.4(Chorein_N:N-terminal region of Chorein or VPS13); PF16910.2(VPS13_mid_rpt:Repeating coiled region of VPS13)
Glyur001026s00034304	9.11384	1.05e-11	8.89e-10	yes	up	0.03	11.68	0.09	0	0	6.04	8.39	20.61	Glyur001026s00034304
Glyur000118s00009657	3.42522	1.07e-11	9e-10	yes	up	0.606667	5.09	0.32	0.87	0.63	4.95	5.97	4.35	Glyur000118s00009657					ENOG4111GDH(S:Function unknown)	XP_006596544.1(PREDICTED: thaumatin-like protein 1 [Glycine max])	sp|A0A1P8B554|THLP1_ARATH(Thaumatin-like protein 1 OS=Arabidopsis thaliana OX=3702 GN=TLP1 PE=2 SV=1)	PF00314.14(Thaumatin:Thaumatin family)
Glyur002719s00034969	-1.22941	1.07e-11	9.03e-10	yes	down	39.7667	12.7933	44.51	31.56	43.23	10.15	15.51	12.72	Glyur002719s00034969	GO:0000155(molecular_function:phosphorelay sensor kinase activity); GO:0016021(cellular_component:integral component of membrane); GO:0005622(cellular_component:intracellular); GO:0023014(biological_process:signal transduction by protein phosphorylation); GO:0000160(biological_process:phosphorelay signal transduction system)	K14489	AHK2_3_4	map04075(Plant hormone signal transduction)	COG0642(T:Signal transduction mechanisms)	XP_003524900.1(PREDICTED: histidine kinase 3 [Glycine max])	sp|Q9C5U1|AHK3_ARATH(Histidine kinase 3 OS=Arabidopsis thaliana OX=3702 GN=AHK3 PE=1 SV=1)	PF03924.10(CHASE:CHASE domain); PF02518.23(HATPase_c:Histidine kinase-, DNA gyrase B-, and HSP90-like ATPase); PF00072.21(Response_reg:Response regulator receiver domain); PF00512.22(HisKA:His Kinase A (phospho-acceptor) domain)
Glyur000085s00008850	3.38861	1.11e-11	9.27e-10	yes	up	12.5867	117.903	5.44	24.1	8.22	121.08	109.23	123.4	Glyur000085s00008850					ENOG410YQ1A(S:Function unknown)	XP_020203647.1(LOW QUALITY PROTEIN: uncharacterized protein LOC109789163 [Cajanus cajan])	sp|Q1PF17|BH018_ARATH(Transcription factor bHLH18 OS=Arabidopsis thaliana OX=3702 GN=BHLH18 PE=1 SV=1)	PF06512.10(Na_trans_assoc:Sodium ion transport-associated)
Glyur003157s00042086	-1.15484	1.15e-11	9.57e-10	yes	down	41.47	14.54	46.15	35.51	42.75	11.42	16.78	15.42	Glyur003157s00042086					ENOG410YG0Z(S:Function unknown)	XP_004513702.1(PREDICTED: uncharacterized protein LOC101510997 [Cicer arietinum])	sp|Q9FZD9|DUF3_ARATH(DUF724 domain-containing protein 3 OS=Arabidopsis thaliana OX=3702 GN=DUF3 PE=1 SV=1)	PF05641.9(Agenet:Agenet domain); PF01426.15(BAH:BAH domain)
Glyur001164s00033513	2.65562	1.18e-11	9.78e-10	yes	up	3.28	15.37	3.12	1.92	4.8	12.33	14.43	19.35	Glyur001164s00033513	GO:0005737(cellular_component:cytoplasm); GO:0006468(biological_process:protein phosphorylation); GO:0018105(biological_process:peptidyl-serine phosphorylation); GO:0004683(molecular_function:calmodulin-dependent protein kinase activity); GO:0005634(cellular_component:nucleus); GO:0009738(biological_process:abscisic acid-activated signaling pathway); GO:0009931(molecular_function:calcium-dependen…	K04515	CAMK2	map05214(Glioma); map04114(Oocyte meiosis); map04750(Inflammatory mediator regulation of TRP channels); map04012(ErbB signaling pathway); map04217(Necroptosis); map04310(Wnt signaling pathway); map04921(Oxytocin signaling pathway); map04922(Glucagon signaling pathway); map04925(Aldosterone synthesis and secretion); map04728(Dopaminergic synapse); map04740(Olfactory transduction); map04725(Choline…	ENOG410XRMJ(T:Signal transduction mechanisms)	XP_004495570.1(PREDICTED: phosphoenolpyruvate carboxylase kinase 1-like [Cicer arietinum])	sp|Q93VK0|PPCK2_ARATH(Phosphoenolpyruvate carboxylase kinase 2 OS=Arabidopsis thaliana OX=3702 GN=PPCK2 PE=1 SV=2)	PF00069.22(Pkinase:Protein kinase domain); PF07714.14(Pkinase_Tyr:Protein tyrosine kinase); PF14531.3(Kinase-like:Kinase-like); PF06293.11(Kdo:Lipopolysaccharide kinase (Kdo/WaaP) family); PF01636.20(APH:Phosphotransferase enzyme family)
Glyur001772s00032258	2.21041	1.2e-11	9.92e-10	yes	up	0.58	2.02333	0.58	0.49	0.67	1.88	1.99	2.2	Glyur001772s00032258	GO:0005871(cellular_component:kinesin complex); GO:0008574(molecular_function:ATP-dependent microtubule motor activity, plus-end-directed); GO:0007018(biological_process:microtubule-based movement); GO:0000166(molecular_function:nucleotide binding)	K10400	KIF15		COG5059(Z:Cytoskeleton)	XP_020232769.1(kinesin-like protein KIN-12F [Cajanus cajan])	sp|F4JDI6|KN12F_ARATH(Kinesin-like protein KIN-12F OS=Arabidopsis thaliana OX=3702 GN=KIN12F PE=3 SV=1)	PF06548.8(Kinesin-related:Kinesin-related); PF00225.20(Kinesin:Kinesin motor domain); PF16796.2(Microtub_bd:Microtubule binding)
Glyur002390s00036720	1.84926	1.39e-11	1.14e-09	yes	up	8.09333	21.2667	11.39	5.71	7.18	22	22.51	19.29	Glyur002390s00036720	GO:0035556(biological_process:intracellular signal transduction); GO:0016042(biological_process:lipid catabolic process); GO:0004435(molecular_function:phosphatidylinositol phospholipase C activity); GO:0004871(molecular_function:signal transducer activity); GO:0005622(cellular_component:intracellular)	K05857	PLCD	map04919(Thyroid hormone signaling pathway); map04070(Phosphatidylinositol signaling system); map04020(Calcium signaling pathway); map04933(AGE-RAGE signaling pathway in diabetic complications); map00562(Inositol phosphate metabolism)	ENOG410XPSW(S:Function unknown)	XP_004490600.1(PREDICTED: phosphoinositide phospholipase C 4-like [Cicer arietinum])	sp|Q944C1|PLCD4_ARATH(Phosphoinositide phospholipase C 4 OS=Arabidopsis thaliana OX=3702 GN=PLC4 PE=2 SV=2)	PF00388.16(PI-PLC-X:Phosphatidylinositol-specific phospholipase C, X domain); PF00387.16(PI-PLC-Y:Phosphatidylinositol-specific phospholipase C, Y domain); PF00168.27(C2:C2 domain); PF09279.8(EF-hand_like:Phosphoinositide-specific phospholipase C, efhand-like)
Glyur000391s00016078	-4.19011	1.44e-11	1.18e-09	yes	down	80.4267	3.59	30.29	74	136.99	1.02	5.3	4.45	Glyur000391s00016078	GO:0008375(molecular_function:acetylglucosaminyltransferase activity); GO:0016021(cellular_component:integral component of membrane); GO:0016020(cellular_component:membrane)				ENOG410ZJRX(S:Function unknown); ENOG410Y97A(S:Function unknown)	XP_020222044.1(uncharacterized protein LOC109804602 [Cajanus cajan])	sp|Q8LDF9|HMGB7_ARATH(High mobility group B protein 7 OS=Arabidopsis thaliana OX=3702 GN=HMGB7 PE=1 SV=1)	PF02485.18(Branch:Core-2/I-Branching enzyme)
Glyur000119s00012153	3.11398	1.57e-11	1.28e-09	yes	up	4.45667	32.1667	6.02	5.47	1.88	34.3	26.84	35.36	Glyur000119s00012153	GO:0005618(cellular_component:cell wall); GO:0016020(cellular_component:membrane); GO:0005576(cellular_component:extracellular region); GO:0009664(biological_process:plant-type cell wall organization)	K20628	exlX		ENOG4111DWI(G:Carbohydrate transport and metabolism); ENOG410YCRV(G:Carbohydrate transport and metabolism)	XP_012841315.1(PREDICTED: LOW QUALITY PROTEIN: expansin-A10 [Erythranthe guttata])	sp|Q38864|EXPA5_ARATH(Expansin-A5 OS=Arabidopsis thaliana OX=3702 GN=EXPA5 PE=2 SV=1)	PF01357.18(Pollen_allerg_1:Pollen allergen); PF03330.15(DPBB_1:Lytic transglycolase)
Glyur000093s00009366	2.37998	1.64e-11	1.33e-09	yes	up	2.68333	10.6667	1.89	2.71	3.45	10.4	9.9	11.7	Glyur000093s00009366	GO:0042391(biological_process:regulation of membrane potential); GO:0016021(cellular_component:integral component of membrane); GO:0005249(molecular_function:voltage-gated potassium channel activity); GO:0005887(cellular_component:integral component of plasma membrane); GO:0071805(biological_process:potassium ion transmembrane transport)	K05391	CNGC	map04626(Plant-pathogen interaction)	ENOG410XPSE(U:Intracellular trafficking, secretion, and vesicular transport)	XP_006592705.1(PREDICTED: putative cyclic nucleotide-gated ion channel 15 [Glycine max])	sp|A0A072VMJ3|CN15C_MEDTR(Protein CNGC15c OS=Medicago truncatula OX=3880 GN=CNGC15C PE=1 SV=1)	PF00520.28(Ion_trans:Ion transport protein); PF00027.26(cNMP_binding:Cyclic nucleotide-binding domain)
Glyur000249s00015888	4.17147	1.66e-11	1.34e-09	yes	up	0.38	5.36	0.18	0.59	0.37	5.89	6.15	4.04	Glyur000249s00015888	GO:0016491(molecular_function:oxidoreductase activity); GO:0046872(molecular_function:metal ion binding); GO:0051213(molecular_function:dioxygenase activity); GO:0055114(biological_process:oxidation-reduction process); GO:0009693(biological_process:ethylene biosynthetic process)	K05933	E1.14.17.4	map00270(Cysteine and methionine metabolism)	COG3491(S:Function unknown)	KHN00185.1(1-aminocyclopropane-1-carboxylate oxidase [Glycine soja])	sp|Q08507|ACCO3_PETHY(1-aminocyclopropane-1-carboxylate oxidase 3 OS=Petunia hybrida OX=4102 GN=ACO3 PE=3 SV=1)	PF14226.3(DIOX_N:non-haem dioxygenase in morphine synthesis N-terminal)
Glyur001627s00031865	6.27462	1.72e-11	1.39e-09	yes	up	0.0266667	1.49667	0	0.04	0.04	0.87	1.42	2.2	Glyur001627s00031865					COG4886(S:Function unknown)	KEH28762.1(leucine-rich receptor-like kinase family protein [Medicago truncatula])	sp|Q6JN47|EIX1_SOLLC(Receptor-like protein EIX1 OS=Solanum lycopersicum OX=4081 GN=EIX1 PE=2 SV=2)	PF13855.3(LRR_8:Leucine rich repeat); PF12799.4(LRR_4:Leucine Rich repeats (2 copies)); PF08263.9(LRRNT_2:Leucine rich repeat N-terminal domain)
Glyur000842s00023839	1.59125	1.73e-11	1.39e-09	yes	up	4.28	9.69	4.79	4.07	3.98	9.07	8.98	11.02	Glyur000842s00023839	GO:0042626(molecular_function:ATPase activity, coupled to transmembrane movement of substances); GO:0016020(cellular_component:membrane); GO:0016021(cellular_component:integral component of membrane); GO:0005886(cellular_component:plasma membrane); GO:0000166(molecular_function:nucleotide binding)				COG1131(V:Defense mechanisms)	XP_004493913.1(PREDICTED: ABC transporter G family member 20 [Cicer arietinum])	sp|Q9LFG8|AB20G_ARATH(ABC transporter G family member 20 OS=Arabidopsis thaliana OX=3702 GN=ABCG20 PE=2 SV=1)	PF01061.21(ABC2_membrane:ABC-2 type transporter); PF00005.24(ABC_tran:ABC transporter); PF13555.3(AAA_29:P-loop containing region of AAA domain); PF13191.3(AAA_16:AAA ATPase domain)
Glyur000890s00019071	2.97036	1.88e-11	1.5e-09	yes	up	84.61	530.16	45.03	127.04	81.76	582.92	503.89	503.67	Glyur000890s00019071	GO:0004497(molecular_function:monooxygenase activity); GO:0016020(cellular_component:membrane); GO:0020037(molecular_function:heme binding); GO:0016709(molecular_function:oxidoreductase activity, acting on paired donors, with incorporation or reduction of molecular oxygen, NAD(P)H as one donor, and incorporation of one atom of oxygen); GO:0016021(cellular_component:integral component of membrane)…	K17873	CYP72A		COG2124(T:Signal transduction mechanisms)	H1A988.1(RecName: Full=11-oxo-beta-amyrin 30-oxidase; AltName: Full=Cytochrome P450 72A154)	sp|H1A988|C7254_GLYUR(11-oxo-beta-amyrin 30-oxidase OS=Glycyrrhiza uralensis OX=74613 GN=CYP72A154 PE=1 SV=1)	PF00067.19(p450:Cytochrome P450)
Glyur001284s00037257	8.70054	1.93e-11	1.54e-09	yes	up	0	5.72	0	0	0	5.43	6.01	5.72	Glyur001284s00037257					ENOG4111B2S(S:Function unknown); ENOG410Y5S3(S:Function unknown)	GAU49160.1(hypothetical protein TSUD_407070 [Trifolium subterraneum])		PF10551.6(MULE:MULE transposase domain)
Glyur000004s00000492	2.46064	1.97e-11	1.56e-09	yes	up	7.61	31.6767	8.92	9.35	4.56	29.88	29.3	35.85	Glyur000004s00000492	GO:0005618(cellular_component:cell wall); GO:0016020(cellular_component:membrane); GO:0005576(cellular_component:extracellular region); GO:0009664(biological_process:plant-type cell wall organization)				ENOG410YEM2(G:Carbohydrate transport and metabolism); ENOG410YC36(G:Carbohydrate transport and metabolism)	XP_020215216.1(expansin-A4-like [Cajanus cajan])	sp|Q38865|EXPA6_ARATH(Expansin-A6 OS=Arabidopsis thaliana OX=3702 GN=EXPA6 PE=2 SV=2)	PF01357.18(Pollen_allerg_1:Pollen allergen); PF03330.15(DPBB_1:Lytic transglycolase)
Glyur002404s00042213	-1.20288	2.09e-11	1.65e-09	yes	down	38.57	12.69	43.72	37.38	34.61	11.33	14.79	11.95	Glyur002404s00042213					COG4886(S:Function unknown)	PNY06519.1(NBS-LRR resistance protein [Trifolium pratense])	sp|Q9LRR4|R13L1_ARATH(Putative disease resistance RPP13-like protein 1 OS=Arabidopsis thaliana OX=3702 GN=RPPL1 PE=3 SV=1)	PF00931.19(NB-ARC:NB-ARC domain); PF12799.4(LRR_4:Leucine Rich repeats (2 copies)); PF13855.3(LRR_8:Leucine rich repeat); PF13191.3(AAA_16:AAA ATPase domain); PF05729.9(NACHT:NACHT domain)
Glyur000334s00019204	-1.65019	2.26e-11	1.78e-09	yes	down	1777.79	420.28	2407.8	1349.65	1575.93	297.65	501.95	461.24	Glyur000334s00019204					ENOG410YWFS(S:Function unknown)	GAU15287.1(hypothetical protein TSUD_03540 [Trifolium subterraneum])
Glyur001066s00037415	-1.77537	2.3e-11	1.81e-09	yes	down	10.3767	2.28667	10.94	7.73	12.46	1.86	2.97	2.03	Glyur001066s00037415
Glyur001054s00021670	2.53145	2.32e-11	1.82e-09	yes	up	32.7833	132.273	51.72	17.69	28.94	170.56	110.63	115.63	Glyur001054s00021670	GO:0008289(molecular_function:lipid binding); GO:0006869(biological_process:lipid transport)				ENOG41118KK(U:Intracellular trafficking, secretion, and vesicular transport); ENOG410YT63(U:Intracellular trafficking, secretion, and vesicular transport); ENOG410YWBC(U:Intracellular trafficking, secretion, and vesicular transport)	NP_001236847.1(uncharacterized protein LOC100306055 [Glycine max])	sp|Q9ZPW9|NLTP8_ARATH(Non-specific lipid-transfer protein 8 OS=Arabidopsis thaliana OX=3702 GN=LTP8 PE=3 SV=1)	PF00234.19(Tryp_alpha_amyl:Protease inhibitor/seed storage/LTP family); PF14368.3(LTP_2:Probable lipid transfer)
Glyur001750s00036527	4.68057	2.85e-11	2.22e-09	yes	up	51.64	1055.01	9.29	96.97	48.66	768.4	1223.15	1173.48	Glyur001750s00036527		K17582	MKI67		ENOG410ZIVW(S:Function unknown); ENOG410XWCH(S:Function unknown); ENOG4111DSA(S:Function unknown); ENOG4111JFX(S:Function unknown)	KRH37835.1(hypothetical protein GLYMA_09G093000 [Glycine max])		PF02095.12(Extensin_1:Extensin-like protein repeat); PF07382.8(HC2:Histone H1-like nucleoprotein HC2)
Glyur000571s00026035	2.92214	2.92e-11	2.27e-09	yes	up	0.88	5.14667	0.76	1.15	0.73	4.11	4.6	6.73	Glyur000571s00026035	GO:0051603(biological_process:proteolysis involved in cellular protein catabolic process); GO:0016020(cellular_component:membrane); GO:0004185(molecular_function:serine-type carboxypeptidase activity); GO:0006508(biological_process:proteolysis)	K16297	SCPL-II		COG2939(S:Function unknown)	KHN23425.1(Serine carboxypeptidase-like 42 [Glycine soja])	sp|Q9FH05|SCP42_ARATH(Serine carboxypeptidase-like 42 OS=Arabidopsis thaliana OX=3702 GN=SCPL42 PE=2 SV=1)	PF00450.19(Peptidase_S10:Serine carboxypeptidase)
Glyur000042s00005105	4.27368	2.93e-11	2.27e-09	yes	up	0.353333	4.85667	0.67	0.22	0.17	5.93	3.82	4.82	Glyur000042s00005105	GO:0008017(molecular_function:microtubule binding)	K10436	MAPRE		COG5217(Z:Cytoskeleton)	KRH28420.1(hypothetical protein GLYMA_11G052200 [Glycine max])	sp|Q9FGQ6|EB1C_ARATH(Microtubule-associated protein RP/EB family member 1C OS=Arabidopsis thaliana OX=3702 GN=EB1C PE=1 SV=1)	PF03271.14(EB1:EB1-like C-terminal motif); PF00307.28(CH:Calponin homology (CH) domain); PF06294.8(CH_2:CH-like domain in sperm protein)
Glyur000486s00021131	-1.52737	3.25e-11	2.51e-09	yes	down	5.89333	1.49667	6.18	4.92	6.58	1.07	1.8	1.62	Glyur000486s00021131
Glyur000416s00028504	2.05311	3.32e-11	2.55e-09	yes	up	2.55667	8.10667	2.38	2.89	2.4	7.09	7.06	10.17	Glyur000416s00028504	GO:0050982(biological_process:detection of mechanical stimulus); GO:0016020(cellular_component:membrane); GO:0006820(biological_process:anion transport); GO:0005886(cellular_component:plasma membrane); GO:0008381(molecular_function:mechanically-gated ion channel activity); GO:0055085(biological_process:transmembrane transport)				COG0668(M:Cell wall/membrane/envelope biogenesis); ENOG410YCQ9(S:Function unknown)	KRH37461.1(hypothetical protein GLYMA_09G067800 [Glycine max])	sp|Q9LYG9|MSL10_ARATH(Mechanosensitive ion channel protein 10 OS=Arabidopsis thaliana OX=3702 GN=MSL10 PE=1 SV=1)	PF00924.15(MS_channel:Mechanosensitive ion channel); PF14812.3(PBP1_TM:Transmembrane domain of transglycosylase PBP1 at N-terminal)
Glyur000608s00025888	-1.83144	3.35e-11	2.57e-09	yes	down	58.69	14.8467	79.31	43.41	53.35	12.56	16.07	15.91	Glyur000608s00025888		K11866	STAMBP, AMSH	map04144(Endocytosis)	COG1310(S:Function unknown)	GAU33784.1(hypothetical protein TSUD_221220 [Trifolium subterraneum])	sp|Q6NKP9|AMSH2_ARATH(AMSH-like ubiquitin thioesterase 2 OS=Arabidopsis thaliana OX=3702 GN=AMSH2 PE=2 SV=1)	PF01398.18(JAB:JAB1/Mov34/MPN/PAD-1 ubiquitin protease); PF14464.3(Prok-JAB:Prokaryotic homologs of the JAB domain)
Glyur002063s00039888	3.59971	3.41e-11	2.6e-09	yes	up	2.69	25.3267	2.27	4.48	1.32	21.64	21.47	32.87	Glyur002063s00039888	GO:0015976(biological_process:carbon utilization); GO:0004089(molecular_function:carbonate dehydratase activity); GO:0008270(molecular_function:zinc ion binding)	K01673	cynT, can	map00910(Nitrogen metabolism)	COG0288(P:Inorganic ion transport and metabolism)	KOM31648.1(hypothetical protein LR48_Vigan01g120300 [Vigna angularis])	sp|P46513|CAH2_FLALI(Carbonic anhydrase 2 (Fragment) OS=Flaveria linearis OX=4225 PE=2 SV=1)	PF00484.16(Pro_CA:Carbonic anhydrase)
Glyur001842s00036005	6.51311	3.41e-11	2.6e-09	yes	up	0.0933333	6.65333	0	0.18	0.1	5.53	5.89	8.54	Glyur001842s00036005					ENOG410Z2X5(S:Function unknown); ENOG410ZK3B(S:Function unknown)	XP_024639790.1(uncharacterized protein LOC112421907 [Medicago truncatula])		PF02992.11(Transposase_21:Transposase family tnp2); PF13960.3(DUF4218:Domain of unknown function (DUF4218)); PF13963.3(Transpos_assoc:Transposase-associated domain)
Glyur000066s00006205	5.28981	3.53e-11	2.68e-09	yes	up	0.11	3.36	0	0.14	0.19	3.56	2.62	3.9	Glyur000066s00006205	GO:0016021(cellular_component:integral component of membrane); GO:0008643(biological_process:carbohydrate transport)	K15285	SLC35E3		ENOG410XP1S(S:Function unknown)	XP_020232612.1(uncharacterized membrane protein At1g06890 [Cajanus cajan])	sp|F4IHS9|UXT1_ARATH(UDP-xylose transporter 1 OS=Arabidopsis thaliana OX=3702 GN=UXT1 PE=1 SV=1)	PF03151.13(TPT:Triose-phosphate Transporter family); PF00892.17(EamA:EamA-like transporter family)
Glyur000223s00013784	1.49969	3.73e-11	2.82e-09	yes	up	6.75667	14.2867	8.3	6.18	5.79	12.93	14.02	15.91	Glyur000223s00013784	GO:0004372(molecular_function:glycine hydroxymethyltransferase activity); GO:0006563(biological_process:L-serine metabolic process); GO:0006544(biological_process:glycine metabolic process); GO:0035999(biological_process:tetrahydrofolate interconversion); GO:0030170(molecular_function:pyridoxal phosphate binding); GO:0008168(molecular_function:methyltransferase activity); GO:0032259(biological_pr…	K00600	glyA, SHMT	map00630(Glyoxylate and dicarboxylate metabolism); map00460(Cyanoamino acid metabolism); map00680(Methane metabolism); map00260(Glycine, serine and threonine metabolism); map01523(Antifolate resistance); map00670(One carbon pool by folate)	COG0112(S:Function unknown)	XP_003629601.1(serine hydroxymethyltransferase 4 [Medicago truncatula])	sp|O23254|GLYC4_ARATH(Serine hydroxymethyltransferase 4 OS=Arabidopsis thaliana OX=3702 GN=SHM4 PE=1 SV=1)	PF00464.16(SHMT:Serine hydroxymethyltransferase)
Glyur000521s00021497	1.74497	3.77e-11	2.83e-09	yes	up	6.07333	15.34	5.8	6.36	6.06	15.61	14.16	16.25	Glyur000521s00021497	GO:0009570(cellular_component:chloroplast stroma); GO:0004314(molecular_function:[acyl-carrier-protein] S-malonyltransferase activity); GO:0008152(biological_process:metabolic process)	K00645	fabD	map00061(Fatty acid biosynthesis); map00333(Prodigiosin biosynthesis)	COG0331(I:Lipid transport and metabolism)	XP_004500316.1(PREDICTED: malonyl-CoA-acyl carrier protein transacylase, mitochondrial [Cicer arietinum])	sp|Q8IVS2|FABD_HUMAN(Malonyl-CoA-acyl carrier protein transacylase, mitochondrial OS=Homo sapiens OX=9606 GN=MCAT PE=1 SV=2)	PF00698.18(Acyl_transf_1:Acyl transferase domain)
Glyur000271s00015150	1.59882	3.76e-11	2.83e-09	yes	up	42.4733	45.67	35.58	45.51	46.33	32.43	53.73	50.85	Glyur000271s00015150	GO:0016788(molecular_function:hydrolase activity, acting on ester bonds)				ENOG410Z1R9(S:Function unknown); ENOG41114N8(S:Function unknown); ENOG4111BJN(S:Function unknown); ENOG410Y9BR(S:Function unknown)	KRH18571.1(hypothetical protein GLYMA_13G068400 [Glycine max])	sp|Q9LY84|GDL76_ARATH(GDSL esterase/lipase At5g14450 OS=Arabidopsis thaliana OX=3702 GN=At5g14450 PE=2 SV=1)
Glyur000100s00008382	2.33065	3.87e-11	2.9e-09	yes	up	4.04	15.3967	4.27	4.9	2.95	14.87	13.22	18.1	Glyur000100s00008382	GO:0016021(cellular_component:integral component of membrane); GO:0016740(molecular_function:transferase activity)				ENOG410YRJG(S:Function unknown)	XP_012572188.1(PREDICTED: uncharacterized protein LOC101490078 [Cicer arietinum])		PF04646.9(DUF604:Protein of unknown function, DUF604); PF02434.13(Fringe:Fringe-like)
Glyur000270s00013297	2.15939	4.01e-11	2.99e-09	yes	up	2.21	7.23	2.83	1.54	2.26	8.67	7.51	5.51	Glyur000270s00013297	GO:0006468(biological_process:protein phosphorylation); GO:0016310(biological_process:phosphorylation); GO:0016021(cellular_component:integral component of membrane); GO:0016020(cellular_component:membrane); GO:0000166(molecular_function:nucleotide binding); GO:0004674(molecular_function:protein serine/threonine kinase activity); GO:0004672(molecular_function:protein kinase activity); GO:0005524(…				COG0515(T:Signal transduction mechanisms); COG4886(S:Function unknown)	XP_004485648.1(PREDICTED: receptor-like protein kinase HAIKU2 [Cicer arietinum])	sp|F4I2N7|RLK7_ARATH(Receptor-like protein kinase 7 OS=Arabidopsis thaliana OX=3702 GN=RLK7 PE=1 SV=1)	PF00069.22(Pkinase:Protein kinase domain); PF07714.14(Pkinase_Tyr:Protein tyrosine kinase); PF13855.3(LRR_8:Leucine rich repeat); PF12799.4(LRR_4:Leucine Rich repeats (2 copies)); PF08263.9(LRRNT_2:Leucine rich repeat N-terminal domain)
Glyur000134s00009752	2.34429	4.07e-11	3.02e-09	yes	up	179.873	747.28	130.27	242.52	166.83	702.29	701.06	838.49	Glyur000134s00009752	GO:0047526(molecular_function:2'-hydroxyisoflavone reductase activity); GO:0055114(biological_process:oxidation-reduction process)				ENOG411028Q(S:Function unknown); ENOG410Y0DY(S:Function unknown)	CAA41106.1(isoflavone reductase [Medicago sativa])	sp|P52575|IFR_MEDSA(Isoflavone reductase OS=Medicago sativa OX=3879 GN=IFR PE=1 SV=1)	PF05368.10(NmrA:NmrA-like family); PF13460.3(NAD_binding_10:NAD(P)H-binding); PF01370.18(Epimerase:NAD dependent epimerase/dehydratase family); PF01073.16(3Beta_HSD:3-beta hydroxysteroid dehydrogenase/isomerase family)
Glyur000063s00005877	1.47495	4.21e-11	3.12e-09	yes	up	41.4333	84.81	44.58	39.91	39.81	90.77	86.05	77.61	Glyur000063s00005877	GO:0016021(cellular_component:integral component of membrane)				COG0401(S:Function unknown)	XP_017428644.1(PREDICTED: UPF0057 membrane protein At4g30660-like [Vigna angularis])	sp|O82232|RC22_ARATH(UPF0057 membrane protein At2g24040 OS=Arabidopsis thaliana OX=3702 GN=At2g24040 PE=3 SV=1)	PF01679.14(Pmp3:Proteolipid membrane potential modulator)
Glyur000461s00027791	5.14322	4.54e-11	3.35e-09	yes	up	0.106667	2.80333	0.12	0.09	0.11	3.06	2.37	2.98	Glyur000461s00027791	GO:0005506(molecular_function:iron ion binding); GO:0046872(molecular_function:metal ion binding); GO:0055114(biological_process:oxidation-reduction process); GO:0051213(molecular_function:dioxygenase activity); GO:0016491(molecular_function:oxidoreductase activity)				COG3491(S:Function unknown)	XP_016163334.1(protein DMR6-LIKE OXYGENASE 1 [Arachis ipaensis])	sp|Q8W2X5|FL3H2_ORYSJ(Flavanone 3-dioxygenase 2 OS=Oryza sativa subsp. japonica OX=39947 GN=F3H-2 PE=1 SV=1)	PF03171.17(2OG-FeII_Oxy:2OG-Fe(II) oxygenase superfamily); PF14226.3(DIOX_N:non-haem dioxygenase in morphine synthesis N-terminal)
Glyur007618s00047434	-2.7324	4.61e-11	3.38e-09	yes	down	105.007	11.2867	170.45	74.87	69.7	9.71	14.96	9.19	Glyur007618s00047434	GO:0016020(cellular_component:membrane); GO:0006810(biological_process:transport)	K14638	SLC15A3_4, PHT		COG3104(O:Posttranslational modification, protein turnover, chaperones)	XP_004508509.1(PREDICTED: protein NRT1/ PTR FAMILY 6.2 [Cicer arietinum])	sp|Q9SZY4|PTR27_ARATH(Protein NRT1/ PTR FAMILY 6.2 OS=Arabidopsis thaliana OX=3702 GN=NPF6.2 PE=1 SV=1)	PF00854.18(PTR2:POT family)
Glyur000854s00021825	-1.75165	4.61e-11	3.38e-09	yes	down	107.427	24.4633	129.33	69.9	123.05	18.17	27.36	27.86	Glyur000854s00021825					ENOG410YF3T(S:Function unknown); ENOG410YC5W(S:Function unknown)	XP_014631694.1(PREDICTED: uncharacterized protein LOC100800837 isoform X8 [Glycine max])		PF05641.9(Agenet:Agenet domain)
Glyur000866s00031706	4.63088	4.63e-11	3.38e-09	yes	up	0.33	5.63333	0.2	0.14	0.65	4.15	6.68	6.07	Glyur000866s00031706					ENOG410YAS0(S:Function unknown)	XP_019424511.1(PREDICTED: protein TORNADO 2-like [Lupinus angustifolius])	sp|Q9FIQ5|TRN2_ARATH(Protein TORNADO 2 OS=Arabidopsis thaliana OX=3702 GN=TRN2 PE=1 SV=1)	PF00335.17(Tetraspannin:Tetraspanin family)
Glyur000296s00018756	2.70808	4.9e-11	3.57e-09	yes	up	1.45	6.38	1.54	1.86	0.95	7.46	6.3	5.38	Glyur000296s00018756	GO:0016021(cellular_component:integral component of membrane); GO:0006629(biological_process:lipid metabolic process); GO:0055114(biological_process:oxidation-reduction process); GO:0016491(molecular_function:oxidoreductase activity)	K13076	SLD		ENOG410XVSZ(I:Lipid transport and metabolism)	XP_004498883.1(PREDICTED: delta(8)-fatty-acid desaturase-like [Cicer arietinum])	sp|O04353|DES6_BOROF(Acyl-lipid (9-3)-desaturase OS=Borago officinalis OX=13363 PE=1 SV=1)	PF00487.21(FA_desaturase:Fatty acid desaturase); PF00173.25(Cyt-b5:Cytochrome b5-like Heme/Steroid binding domain)
Glyur000595s00018298	-1.7343	5.71e-11	4.15e-09	yes	down	94.59	20.95	128.34	63.35	92.08	18.34	26.63	17.88	Glyur000595s00018298		K12116	FKF1	map04712(Circadian rhythm - plant)	ENOG410XRGE(S:Function unknown)	AML77592.1(putative LOV domain-containing protein [Glycyrrhiza lepidota])	sp|Q9C9W9|ADO3_ARATH(Adagio protein 3 OS=Arabidopsis thaliana OX=3702 GN=ADO3 PE=1 SV=1)	PF13418.3(Kelch_4:Galactose oxidase, central domain); PF13415.3(Kelch_3:Galactose oxidase, central domain); PF13854.3(Kelch_5:Kelch motif); PF07646.12(Kelch_2:Kelch motif); PF01344.22(Kelch_1:Kelch motif); PF13964.3(Kelch_6:Kelch motif); PF13426.4(PAS_9:PAS domain); PF08447.9(PAS_3:PAS fold); PF00989.22(PAS:PAS fold); PF00646.30(F-box:F-box domain); PF08448.7(PAS_4:PAS fold)
Glyur000460s00029342	-1.04803	5.74e-11	4.15e-09	yes	down	45.7367	16.59	54.67	36.94	45.6	13.37	18.97	17.43	Glyur000460s00029342	GO:0005488(molecular_function:binding)				COG5213(A:RNA processing and modification)	XP_004513530.1(PREDICTED: FIP1[V]-like protein [Cicer arietinum])	sp|F4KDH9|FIPS5_ARATH(FIP1[V]-like protein OS=Arabidopsis thaliana OX=3702 GN=FIPS5 PE=1 SV=1)	PF05182.10(Fip1:Fip1 motif)
Glyur000106s00011735	4.27893	5.76e-11	4.15e-09	yes	up	0.673333	10.2933	0.36	1.27	0.39	9.48	7.45	13.95	Glyur000106s00011735	GO:0005215(molecular_function:transporter activity); GO:0016021(cellular_component:integral component of membrane); GO:0006810(biological_process:transport)	K09872	PIP		COG0580(G:Carbohydrate transport and metabolism)	AFK47400.1(unknown [Lotus japonicus])	sp|P43287|PIP22_ARATH(Aquaporin PIP2-2 OS=Arabidopsis thaliana OX=3702 GN=PIP2-2 PE=1 SV=2)	PF00230.17(MIP:Major intrinsic protein)
Glyur000172s00014872	-1.03666	5.84e-11	4.2e-09	yes	down	88.41	34.72	100.75	80.28	84.2	29.81	39.08	35.27	Glyur000172s00014872	GO:0006355(biological_process:regulation of transcription, DNA-templated); GO:0005634(cellular_component:nucleus); GO:0003677(molecular_function:DNA binding)				ENOG4111HV1(T:Signal transduction mechanisms); COG5269(K:Transcription)	XP_003548642.1(PREDICTED: protein REVEILLE 5 isoform X1 [Glycine max])	sp|C0SVG5|RVE5_ARATH(Protein REVEILLE 5 OS=Arabidopsis thaliana OX=3702 GN=RVE5 PE=2 SV=1)	PF00249.28(Myb_DNA-binding:Myb-like DNA-binding domain)
Glyur002007s00039767	3.13635	5.88e-11	4.21e-09	yes	up	1.43667	20.2367	0.94	0.55	2.82	12.11	22.07	26.53	Glyur002007s00039767	GO:0016491(molecular_function:oxidoreductase activity)				COG0277(C:Energy production and conversion)	XP_004504926.1(PREDICTED: cannabidiolic acid synthase-like 2 [Cicer arietinum])	sp|Q9SVG5|BBE18_ARATH(Berberine bridge enzyme-like 18 OS=Arabidopsis thaliana OX=3702 GN=At4g20820 PE=3 SV=1)	PF08031.9(BBE:Berberine and berberine like); PF01565.20(FAD_binding_4:FAD binding domain)
Glyur000215s00017032	7.03572	6.1e-11	4.35e-09	yes	up	0.0433333	4.08	0	0	0.13	5.68	4.24	2.32	Glyur000215s00017032	GO:0010215(biological_process:cellulose microfibril organization); GO:0009834(biological_process:plant-type secondary cell wall biogenesis); GO:0016021(cellular_component:integral component of membrane); GO:0005774(cellular_component:vacuolar membrane); GO:0005886(cellular_component:plasma membrane); GO:0016049(biological_process:cell growth); GO:0031225(cellular_component:anchored component of m…				ENOG410YAAC(S:Function unknown)	AFK33956.1(unknown [Lotus japonicus])	sp|Q9LFW3|COBL4_ARATH(COBRA-like protein 4 OS=Arabidopsis thaliana OX=3702 GN=COBL4 PE=2 SV=2)	PF04833.12(COBRA:COBRA-like protein)
Glyur000096s00005926	-1.71647	6.45e-11	4.59e-09	yes	down	98.4167	23.6367	95.91	113.94	85.4	20.22	28.82	21.87	Glyur000096s00005926	GO:0003824(molecular_function:catalytic activity)				ENOG410YE2N(O:Posttranslational modification, protein turnover, chaperones); ENOG410XRTN(O:Posttranslational modification, protein turnover, chaperones)	XP_004509274.1(PREDICTED: U-box domain-containing protein 5 [Cicer arietinum])	sp|Q9CAG5|PUB7_ARATH(U-box domain-containing protein 7 OS=Arabidopsis thaliana OX=3702 GN=PUB7 PE=2 SV=1)	PF04564.12(U-box:U-box domain); PF05804.9(KAP:Kinesin-associated protein (KAP))
Glyur005913s00045896	2.07144	6.76e-11	4.79e-09	yes	up	13.3	41.48	9.79	15.73	14.38	47.33	42.85	34.26	Glyur005913s00045896	GO:0005975(biological_process:carbohydrate metabolic process); GO:0051287(molecular_function:NAD binding); GO:0005829(cellular_component:cytosol); GO:0006065(biological_process:UDP-glucuronate biosynthetic process); GO:0055114(biological_process:oxidation-reduction process); GO:0003979(molecular_function:UDP-glucose 6-dehydrogenase activity); GO:0005634(cellular_component:nucleus); GO:0006024(bio…	K00012	UGDH, ugd	map00520(Amino sugar and nucleotide sugar metabolism); map00040(Pentose and glucuronate interconversions); map00053(Ascorbate and aldarate metabolism)	COG1004(M:Cell wall/membrane/envelope biogenesis)	GAU50389.1(hypothetical protein TSUD_409400 [Trifolium subterraneum])	sp|Q2QS14|UGDH4_ORYSJ(UDP-glucose 6-dehydrogenase 4 OS=Oryza sativa subsp. japonica OX=39947 GN=UGD4 PE=2 SV=1)	PF03721.11(UDPG_MGDP_dh_N:UDP-glucose/GDP-mannose dehydrogenase family, NAD binding domain); PF03720.12(UDPG_MGDP_dh_C:UDP-glucose/GDP-mannose dehydrogenase family, UDP binding domain); PF00984.16(UDPG_MGDP_dh:UDP-glucose/GDP-mannose dehydrogenase family, central domain)
Glyur000343s00025703	1.19686	6.92e-11	4.89e-09	yes	up	16.2767	27.7467	18.57	13.53	16.73	28.41	27.07	27.76	Glyur000343s00025703	GO:0016301(molecular_function:kinase activity); GO:0000166(molecular_function:nucleotide binding)	K00938	E2.7.4.2, mvaK2	map00900(Terpenoid backbone biosynthesis)	COG3890(I:Lipid transport and metabolism)	XP_004502634.1(PREDICTED: probable phosphomevalonate kinase [Cicer arietinum])	sp|Q9C6T1|PMK_ARATH(Phosphomevalonate kinase, peroxisomal OS=Arabidopsis thaliana OX=3702 GN=PMK PE=1 SV=1)	PF00288.23(GHMP_kinases_N:GHMP kinases N terminal domain); PF08544.10(GHMP_kinases_C:GHMP kinases C terminal)
Glyur000677s00026183	-1.35847	7.34e-11	5.17e-09	yes	down	17.91	5.23333	22.05	14.66	17.02	3.76	6.18	5.76	Glyur000677s00026183					ENOG410Y9VT(S:Function unknown); ENOG410XQDR(S:Function unknown)	XP_020215146.1(IRK-interacting protein [Cajanus cajan])	sp|Q8RWR1|JMJ30_ARATH(Lysine-specific demethylase JMJ30 OS=Arabidopsis thaliana OX=3702 GN=JMJ30 PE=1 SV=1)	PF13621.3(Cupin_8:Cupin-like domain); PF08007.9(Cupin_4:Cupin superfamily protein); PF02373.19(JmjC:JmjC domain, hydroxylase)
Glyur000127s00009200	-1.0751	7.65e-11	5.37e-09	yes	down	65.8867	23.89	83.84	51.8	62.02	21	25.98	24.69	Glyur000127s00009200	GO:0008289(molecular_function:lipid binding)				ENOG410Z77E(S:Function unknown)	XP_013458134.1(protein ENHANCED DISEASE RESISTANCE 2 isoform X1 [Medicago truncatula])	sp|F4JSE7|EDR2_ARATH(Protein ENHANCED DISEASE RESISTANCE 2 OS=Arabidopsis thaliana OX=3702 GN=EDR2 PE=2 SV=1)	PF07059.9(DUF1336:Protein of unknown function (DUF1336)); PF01852.16(START:START domain)
Glyur002976s00038387	-1.12529	7.91e-11	5.54e-09	yes	down	25.2467	8.68	29.2	22.76	23.78	8.64	9.5	7.9	Glyur002976s00038387	GO:0005736(cellular_component:DNA-directed RNA polymerase I complex); GO:0005634(cellular_component:nucleus); GO:0006360(biological_process:transcription from RNA polymerase I promoter); GO:0008270(molecular_function:zinc ion binding); GO:0001054(molecular_function:RNA polymerase I activity); GO:0003677(molecular_function:DNA binding); GO:0003899(molecular_function:DNA-directed RNA polymerase act…	K02999	RPA1, POLR1A	map00240(Pyrimidine metabolism); map03020(RNA polymerase); map00230(Purine metabolism)	COG0086(B:Chromatin structure and dynamics); COG0086(D:Cell cycle control, cell division, chromosome partitioning)	XP_020207668.1(DNA-directed RNA polymerase I subunit 1 [Cajanus cajan])	sp|Q9SVY0|NRPA1_ARATH(DNA-directed RNA polymerase I subunit 1 OS=Arabidopsis thaliana OX=3702 GN=NRPA1 PE=3 SV=1)	PF04998.14(RNA_pol_Rpb1_5:RNA polymerase Rpb1, domain 5); PF00623.17(RNA_pol_Rpb1_2:RNA polymerase Rpb1, domain 2); PF04997.9(RNA_pol_Rpb1_1:RNA polymerase Rpb1, domain 1); PF04983.15(RNA_pol_Rpb1_3:RNA polymerase Rpb1, domain 3); PF05000.14(RNA_pol_Rpb1_4:RNA polymerase Rpb1, domain 4)
Glyur001226s00038355	-5.69896	8.06e-11	5.61e-09	yes	down	46.94	0.64	33.72	64.26	42.84	1.47	0.02	0.43	Glyur001226s00038355	GO:0006952(biological_process:defense response)				ENOG410YA6B(S:Function unknown)	AAK72104.1(putative Hs1pro-1-like protein [Cicer arietinum])	sp|O04203|HSPR2_ARATH(Nematode resistance protein-like HSPRO2 OS=Arabidopsis thaliana OX=3702 GN=HSPRO2 PE=1 SV=1)
Glyur002259s00033470	5.42124	8.06e-11	5.61e-09	yes	up	0.23	7.88667	0.07	0.56	0.06	5.59	6.52	11.55	Glyur002259s00033470	GO:0045492(biological_process:xylan biosynthetic process); GO:0008168(molecular_function:methyltransferase activity); GO:0032259(biological_process:methylation)	K18801	GXM		ENOG410YHE6(S:Function unknown)	XP_019422642.1(PREDICTED: glucuronoxylan 4-O-methyltransferase 2-like [Lupinus angustifolius])	sp|Q9LQ32|GXM3_ARATH(Glucuronoxylan 4-O-methyltransferase 3 OS=Arabidopsis thaliana OX=3702 GN=GXM3 PE=1 SV=1)	PF04669.10(Polysacc_synt_4:Polysaccharide biosynthesis)
Glyur000252s00012660	2.52888	8.32e-11	5.77e-09	yes	up	9.01	40.1733	9.71	11.66	5.66	29.53	37.03	53.96	Glyur000252s00012660	GO:0005215(molecular_function:transporter activity); GO:0016021(cellular_component:integral component of membrane); GO:0006810(biological_process:transport); GO:0005622(cellular_component:intracellular)	K19996	SFH5		ENOG410XRSQ(S:Function unknown)	XP_007159915.1(hypothetical protein PHAVU_002G278300g [Phaseolus vulgaris])	sp|Q56Z59|PATL3_ARATH(Patellin-3 OS=Arabidopsis thaliana OX=3702 GN=PATL3 PE=1 SV=2)	PF00650.17(CRAL_TRIO:CRAL/TRIO domain); PF03765.12(CRAL_TRIO_N:CRAL/TRIO, N-terminal domain)
Glyur000615s00024016	2.40616	8.68e-11	6e-09	yes	up	2.76333	10.9267	3.69	2.97	1.63	12.21	10.6	9.97	Glyur000615s00024016	GO:0005783(cellular_component:endoplasmic reticulum); GO:0016021(cellular_component:integral component of membrane); GO:0005544(molecular_function:calcium-dependent phospholipid binding); GO:0005509(molecular_function:calcium ion binding); GO:0005886(cellular_component:plasma membrane); GO:0009506(cellular_component:plasmodesma)				ENOG410YF68(S:Function unknown); ENOG410Y912(S:Function unknown)	XP_016181298.1(protein QUIRKY [Arachis ipaensis])	sp|B8XCH5|QKY_ARATH(Protein QUIRKY OS=Arabidopsis thaliana OX=3702 GN=QKY PE=2 SV=1)	PF08372.7(PRT_C:Plant phosphoribosyltransferase C-terminal); PF00168.27(C2:C2 domain); PF11696.5(DUF3292:Protein of unknown function (DUF3292)); PF10358.6(NT-C2:N-terminal C2 in EEIG1 and EHBP1 proteins)
Glyur003630s00039680	10.129	9.2e-11	6.34e-09	yes	up	0	13.7133	0	0	0	22.87	16.77	1.5	Glyur003630s00039680	GO:0009753(biological_process:response to jasmonic acid); GO:0080027(biological_process:response to herbivore); GO:0009570(cellular_component:chloroplast stroma); GO:0010333(molecular_function:terpene synthase activity); GO:0000287(molecular_function:magnesium ion binding); GO:0009611(biological_process:response to wounding); GO:0006952(biological_process:defense response); GO:0008152(biological_…	K12742;K19968	ispS;TPS03	map00900(Terpenoid backbone biosynthesis)	ENOG410YF98(O:Posttranslational modification, protein turnover, chaperones); ENOG410YBXH(O:Posttranslational modification, protein turnover, chaperones); ENOG41115RY(O:Posttranslational modification, protein turnover, chaperones)	XP_019453759.1(PREDICTED: tricyclene synthase EBOS, chloroplastic-like isoform X2 [Lupinus angustifolius])	sp|Q5UB07|TPS4_MEDTR(Tricyclene synthase TPS4, chloroplastic OS=Medicago truncatula OX=3880 GN=TPS4 PE=1 SV=1)	PF01397.18(Terpene_synth:Terpene synthase, N-terminal domain)
Glyur000220s00014764	2.16615	9.69e-11	6.66e-09	yes	up	2.2	8.86333	2.16	1.85	2.59	10.88	7.79	7.92	Glyur000220s00014764	GO:0016021(cellular_component:integral component of membrane); GO:0006810(biological_process:transport); GO:0005524(molecular_function:ATP binding); GO:0016887(molecular_function:ATPase activity)				COG0842(V:Defense mechanisms); COG1131(V:Defense mechanisms)	EMS67309.1(ABC transporter G family member 39 [Triticum urartu])	sp|Q8GU88|AB39G_ORYSJ(ABC transporter G family member 39 OS=Oryza sativa subsp. japonica OX=39947 GN=ABCG39 PE=3 SV=1)	PF01061.21(ABC2_membrane:ABC-2 type transporter); PF00005.24(ABC_tran:ABC transporter); PF13304.3(AAA_21:AAA domain, putative AbiEii toxin, Type IV TA system)
Glyur000225s00014715	1.20638	9.83e-11	6.73e-09	yes	up	27.0133	46.2167	30.9	21.56	28.58	47.69	47.29	43.67	Glyur000225s00014715	GO:0016021(cellular_component:integral component of membrane)				ENOG410YCQ2(S:Function unknown)	XP_004490554.1(PREDICTED: uncharacterized protein LOC101514743 [Cicer arietinum])		PF10250.6(O-FucT:GDP-fucose protein O-fucosyltransferase)
Glyur000002s00000269	3.4656	1.02e-10	6.95e-09	yes	up	0.47	4.01	0.38	0.74	0.29	4.73	3.96	3.34	Glyur000002s00000269	GO:0016020(cellular_component:membrane); GO:0030570(molecular_function:pectate lyase activity); GO:0016829(molecular_function:lyase activity); GO:0046872(molecular_function:metal ion binding); GO:0045490(biological_process:pectin catabolic process)	K01728	pel	map00040(Pentose and glucuronate interconversions); map02024(Quorum sensing)	COG3866(G:Carbohydrate transport and metabolism)	XP_017415501.1(PREDICTED: probable pectate lyase 18 [Vigna angularis])	sp|Q9SCP2|PLY12_ARATH(Probable pectate lyase 12 OS=Arabidopsis thaliana OX=3702 GN=At3g53190 PE=2 SV=2)	PF00544.16(Pec_lyase_C:Pectate lyase); PF13229.3(Beta_helix:Right handed beta helix region); PF15872.2(SRTM1:Serine-rich and transmembrane domain-containing protein 1)
Glyur001011s00030359	2.27309	1.05e-10	7.13e-09	yes	up	1.77667	6.47333	1.69	1.63	2.01	5.65	6.65	7.12	Glyur001011s00030359	GO:0006887(biological_process:exocytosis); GO:0016192(biological_process:vesicle-mediated transport); GO:0000149(molecular_function:SNARE binding); GO:0006906(biological_process:vesicle fusion); GO:0031201(cellular_component:SNARE complex); GO:0005484(molecular_function:SNAP receptor activity); GO:0016021(cellular_component:integral component of membrane)	K08511	ATVAMP72		COG5143(U:Intracellular trafficking, secretion, and vesicular transport)	XP_003532299.1(PREDICTED: vesicle-associated membrane protein 722 [Glycine max])	sp|O48850|VA725_ARATH(Vesicle-associated membrane protein 725 OS=Arabidopsis thaliana OX=3702 GN=VAMP725 PE=2 SV=2)	PF00957.18(Synaptobrevin:Synaptobrevin); PF13774.3(Longin:Regulated-SNARE-like domain)
Glyur001097s00035190	-2.67108	1.1e-10	7.47e-09	yes	down	30.3533	14.6667	45.52	16.62	28.92	12.27	10.15	21.58	Glyur001097s00035190	GO:0046872(molecular_function:metal ion binding); GO:0051213(molecular_function:dioxygenase activity); GO:0055114(biological_process:oxidation-reduction process); GO:0016491(molecular_function:oxidoreductase activity)				COG3491(S:Function unknown)	KHM98992.1(Codeine O-demethylase [Glycine soja])	sp|Q39224|SRG1_ARATH(Protein SRG1 OS=Arabidopsis thaliana OX=3702 GN=SRG1 PE=2 SV=1)	PF03171.17(2OG-FeII_Oxy:2OG-Fe(II) oxygenase superfamily); PF13450.3(NAD_binding_8:NAD(P)-binding Rossmann-like domain); PF14226.3(DIOX_N:non-haem dioxygenase in morphine synthesis N-terminal); PF01593.21(Amino_oxidase:Flavin containing amine oxidoreductase)
Glyur000129s00012457	1.91181	1.11e-10	7.49e-09	yes	up	1.29	3.63	1.35	0.99	1.53	3.31	3.65	3.93	Glyur000129s00012457	GO:0000910(biological_process:cytokinesis); GO:0044763(biological_process:single-organism cellular process); GO:0008017(molecular_function:microtubule binding); GO:0000226(biological_process:microtubule cytoskeleton organization)	K16732	PRC1		ENOG410YZBK(S:Function unknown)	XP_004495425.1(PREDICTED: 65-kDa microtubule-associated protein 3-like [Cicer arietinum])	sp|Q9FHM4|MA653_ARATH(65-kDa microtubule-associated protein 3 OS=Arabidopsis thaliana OX=3702 GN=MAP65-3 PE=1 SV=1)	PF03999.9(MAP65_ASE1:Microtubule associated protein (MAP65/ASE1 family))
Glyur009449s00047252	3.56646	1.12e-10	7.55e-09	yes	up	25.3733	231.18	18.04	43.53	14.55	323.61	211.08	158.85	Glyur009449s00047252	GO:0004497(molecular_function:monooxygenase activity); GO:0020037(molecular_function:heme binding); GO:0016021(cellular_component:integral component of membrane); GO:0016705(molecular_function:oxidoreductase activity, acting on paired donors, with incorporation or reduction of molecular oxygen); GO:0005506(molecular_function:iron ion binding); GO:0055114(biological_process:oxidation-reduction pro…	K20562	CYP736A		COG2124(Q:Secondary metabolites biosynthesis, transport and catabolism)	XP_003615665.1(cytochrome P450 CYP736A12 [Medicago truncatula])	sp|H2DH18|C7A12_PANGI(Cytochrome P450 CYP736A12 OS=Panax ginseng OX=4054 PE=2 SV=1)	PF00067.19(p450:Cytochrome P450)
Glyur010729s00047784	6.82107	1.13e-10	7.62e-09	yes	up	0.406667	28.8333	1.22	0	0	44.06	14.98	27.46	Glyur010729s00047784	GO:0008270(molecular_function:zinc ion binding)	K16281	RHA1		ENOG41121N2(S:Function unknown)	XP_004503686.1(PREDICTED: E3 ubiquitin-protein ligase RHA1B [Cicer arietinum])	sp|Q9SUS5|RHA1B_ARATH(E3 ubiquitin-protein ligase RHA1B OS=Arabidopsis thaliana OX=3702 GN=RHA1B PE=2 SV=1)	PF13639.3(zf-RING_2:Ring finger domain); PF17123.2(zf-RING_11:RING-like zinc finger); PF00097.22(zf-C3HC4:Zinc finger, C3HC4 type (RING finger)); PF13923.3(zf-C3HC4_2:Zinc finger, C3HC4 type (RING finger)); PF12678.4(zf-rbx1:RING-H2 zinc finger domain); PF14634.3(zf-RING_5:zinc-RING finger domain); PF14447.3(Prok-RING_4:Prokaryotic RING finger family 4); PF13445.3(zf-RING_UBOX:RING-type zinc-fing…
Glyur000319s00018985	2.55796	1.17e-10	7.83e-09	yes	up	0.81	3.49	1.18	0.41	0.84	3.06	3.81	3.6	Glyur000319s00018985	GO:0006468(biological_process:protein phosphorylation); GO:0016310(biological_process:phosphorylation); GO:0000166(molecular_function:nucleotide binding); GO:0004674(molecular_function:protein serine/threonine kinase activity); GO:0004672(molecular_function:protein kinase activity); GO:0005524(molecular_function:ATP binding)				COG0515(T:Signal transduction mechanisms)	XP_003530121.2(PREDICTED: receptor like protein kinase S.2-like [Glycine max])	sp|O48837|LRKS2_ARATH(Receptor like protein kinase S.2 OS=Arabidopsis thaliana OX=3702 GN=LECRKS2 PE=2 SV=2)	PF00069.22(Pkinase:Protein kinase domain); PF07714.14(Pkinase_Tyr:Protein tyrosine kinase)
Glyur000133s00010362	2.1617	1.2e-10	8.01e-09	yes	up	1.57333	5.37333	2.1	1.29	1.33	5.01	4.48	6.63	Glyur000133s00010362	GO:0006470(biological_process:protein dephosphorylation); GO:0004722(molecular_function:protein serine/threonine phosphatase activity)				COG0631(T:Signal transduction mechanisms)	KHN04510.1(Hypothetical protein glysoja_019597 [Glycine soja])	sp|Q9FX08|P2C12_ARATH(Probable protein phosphatase 2C 12 OS=Arabidopsis thaliana OX=3702 GN=At1g47380 PE=2 SV=1)	PF00481.18(PP2C:Protein phosphatase 2C); PF13672.3(PP2C_2:Protein phosphatase 2C)
Glyur000006s00001648	2.70491	1.32e-10	8.8e-09	yes	up	9.52	48.1467	6.3	14.01	8.25	48.43	44.19	51.82	Glyur000006s00001648	GO:0016787(molecular_function:hydrolase activity); GO:0008152(biological_process:metabolic process)				COG0657(I:Lipid transport and metabolism)	XP_003608013.1(probable carboxylesterase 2 [Medicago truncatula])	sp|Q9SX78|CXE2_ARATH(Probable carboxylesterase 2 OS=Arabidopsis thaliana OX=3702 GN=CXE2 PE=2 SV=1)
Glyur000661s00022616	3.11661	1.33e-10	8.84e-09	yes	up	2.06333	13.8433	1.88	3.23	1.08	15.37	13.2	12.96	Glyur000661s00022616	GO:0016722(molecular_function:oxidoreductase activity, oxidizing metal ions); GO:0009506(cellular_component:plasmodesma); GO:0005507(molecular_function:copper ion binding); GO:0009505(cellular_component:plant-type cell wall); GO:0055114(biological_process:oxidation-reduction process); GO:0016491(molecular_function:oxidoreductase activity)				COG2132(Q:Secondary metabolites biosynthesis, transport and catabolism)	XP_004500896.1(PREDICTED: L-ascorbate oxidase homolog [Cicer arietinum])	sp|Q00624|ASOL_BRANA(L-ascorbate oxidase homolog OS=Brassica napus OX=3708 GN=Bp10 PE=2 SV=1)	PF00394.19(Cu-oxidase:Multicopper oxidase); PF07732.12(Cu-oxidase_3:Multicopper oxidase); PF07731.11(Cu-oxidase_2:Multicopper oxidase)
Glyur000905s00030404	2.32388	1.34e-10	8.85e-09	yes	up	85.2933	318.45	56.56	96.62	102.7	360.85	309.79	284.71	Glyur000905s00030404	GO:0016021(cellular_component:integral component of membrane); GO:0016020(cellular_component:membrane)				ENOG410XWC4(S:Function unknown)	XP_004509714.1(PREDICTED: uncharacterized protein At5g65660-like [Cicer arietinum])	sp|Q9LSK9|Y5566_ARATH(Uncharacterized protein At5g65660 OS=Arabidopsis thaliana OX=3702 GN=At5g65660 PE=2 SV=1)
Glyur000548s00021018	1.43884	1.34e-10	8.85e-09	yes	up	21.4133	44.23	20.19	23.19	20.86	41.38	44.43	46.88	Glyur000548s00021018	GO:0005524(molecular_function:ATP binding)	K01648	ACLY	map00020(Citrate cycle (TCA cycle)); map00720(Carbon fixation pathways in prokaryotes)	COG0045(C:Energy production and conversion)	PNY14684.1(ATP-citrate synthase alpha chain protein 1-like [Trifolium pratense])	sp|Q9SGY2|ACLA1_ARATH(ATP-citrate synthase alpha chain protein 1 OS=Arabidopsis thaliana OX=3702 GN=ACLA-1 PE=1 SV=1)	PF16114.2(Citrate_bind:ATP citrate lyase citrate-binding); PF08442.7(ATP-grasp_2:ATP-grasp domain)
Glyur000350s00020070	-2.21315	1.43e-10	9.39e-09	yes	down	10.1967	1.68667	11.34	9.88	9.37	1.36	2.59	1.11	Glyur000350s00020070	GO:0006952(biological_process:defense response); GO:0043531(molecular_function:ADP binding)				COG4886(P:Inorganic ion transport and metabolism)	XP_003601846.1(putative disease resistance protein RGA4 [Medicago truncatula])	sp|Q7XA40|RGA3_SOLBU(Putative disease resistance protein RGA3 OS=Solanum bulbocastanum OX=147425 GN=RGA3 PE=2 SV=2)	PF00931.19(NB-ARC:NB-ARC domain)
Glyur000432s00027010	7.71905	1.44e-10	9.48e-09	yes	up	0.06	6.97333	0	0.16	0.02	1.32	4	15.6	Glyur000432s00027010	GO:0004497(molecular_function:monooxygenase activity); GO:0020037(molecular_function:heme binding); GO:0016709(molecular_function:oxidoreductase activity, acting on paired donors, with incorporation or reduction of molecular oxygen, NAD(P)H as one donor, and incorporation of one atom of oxygen); GO:0044550(biological_process:secondary metabolite biosynthetic process); GO:0016021(cellular_componen…	K07408	CYP1A1	map05204(Chemical carcinogenesis); map00980(Metabolism of xenobiotics by cytochrome P450); map04913(Ovarian steroidogenesis); map00830(Retinol metabolism); map00140(Steroid hormone biosynthesis); map00380(Tryptophan metabolism)	COG2124(Q:Secondary metabolites biosynthesis, transport and catabolism)	XP_003537188.1(PREDICTED: cytochrome P450 93A3-like [Glycine max])	sp|O81973|C93A3_SOYBN(Cytochrome P450 93A3 OS=Glycine max OX=3847 GN=CYP93A3 PE=2 SV=1)	PF00067.19(p450:Cytochrome P450)
Glyur005301s00043746	2.67025	1.45e-10	9.48e-09	yes	up	7.97667	38.4967	6.23	9.02	8.68	26.43	34.93	54.13	Glyur005301s00043746		K13448	CML	map04626(Plant-pathogen interaction)	COG5126(D:Cell cycle control, cell division, chromosome partitioning); COG5126(T:Signal transduction mechanisms); COG5126(Z:Cytoskeleton)	XP_004493430.1(PREDICTED: probable calcium-binding protein CML36 [Cicer arietinum])	sp|P30188|CML35_ARATH(Probable calcium-binding protein CML35 OS=Arabidopsis thaliana OX=3702 GN=CML35 PE=2 SV=2)	PF13202.3(EF-hand_5:EF hand); PF00036.29(EF-hand_1:EF hand); PF13405.3(EF-hand_6:EF-hand domain)
Glyur004026s00039328	2.07004	1.45e-10	9.48e-09	yes	up	1.51	4.78667	1.68	1.51	1.34	3.79	4.66	5.91	Glyur004026s00039328	GO:0005773(cellular_component:vacuole); GO:0016021(cellular_component:integral component of membrane); GO:0008324(molecular_function:cation transmembrane transporter activity); GO:0071577(biological_process:zinc II ion transmembrane transport); GO:0005385(molecular_function:zinc ion transmembrane transporter activity); GO:0010043(biological_process:response to zinc ion); GO:0098655(biological_pro…				ENOG41101BZ(S:Function unknown)	KYP60458.1(hypothetical protein KK1_022864 [Cajanus cajan])		PF00892.17(EamA:EamA-like transporter family)
Glyur003532s00040331	2.02181	1.46e-10	9.5e-09	yes	up	1.39	4.18667	1.66	1.29	1.22	4.27	3.68	4.61	Glyur003532s00040331	GO:0005618(cellular_component:cell wall); GO:0004252(molecular_function:serine-type endopeptidase activity); GO:0008236(molecular_function:serine-type peptidase activity)				COG1404(S:Function unknown)	KHN11556.1(Subtilisin-like protease [Glycine soja])	sp|I1N462|SBT1_SOYBN(Subtilisin-like protease Glyma18g48580 OS=Glycine max OX=3847 GN=Glyma18g48580 PE=1 SV=3)	PF00082.19(Peptidase_S8:Subtilase family); PF05922.13(Inhibitor_I9:Peptidase inhibitor I9)
Glyur000091s00010522	4.46494	1.58e-10	1.02e-08	yes	up	0.136667	2.1	0.26	0.12	0.03	1.95	2.08	2.27	Glyur000091s00010522					ENOG410YSYI(S:Function unknown); ENOG410YXY7(S:Function unknown); ENOG410ZPSC(S:Function unknown)	XP_020238076.1(protein WVD2-like 7 [Cajanus cajan])	sp|Q0WSZ8|WDL6_ARATH(Protein WVD2-like 6 OS=Arabidopsis thaliana OX=3702 GN=WDL6 PE=1 SV=1)	PF06886.8(TPX2:Targeting protein for Xklp2 (TPX2))
Glyur000662s00023495	2.23882	1.61e-10	1.04e-08	yes	up	2.49333	8.88333	2.25	1.84	3.39	6.63	8.33	11.69	Glyur000662s00023495	GO:0016021(cellular_component:integral component of membrane); GO:0008810(molecular_function:cellulase activity); GO:0030245(biological_process:cellulose catabolic process)				ENOG410XPC9(S:Function unknown); ENOG4111DAS(S:Function unknown)	XP_003527686.1(PREDICTED: endoglucanase 2 [Glycine max])	sp|Q8LCP6|GUN10_ARATH(Endoglucanase 10 OS=Arabidopsis thaliana OX=3702 GN=At1g75680 PE=2 SV=2)	PF00759.16(Glyco_hydro_9:Glycosyl hydrolase family 9)
Glyur000258s00015263	2.02309	1.65e-10	1.07e-08	yes	up	3.12667	9.52667	3.77	3.2	2.41	8.57	9.24	10.77	Glyur000258s00015263	GO:0046417(biological_process:chorismate metabolic process); GO:0004106(molecular_function:chorismate mutase activity); GO:0009073(biological_process:aromatic amino acid family biosynthetic process)	K01850	E5.4.99.5	map00400(Phenylalanine, tyrosine and tryptophan biosynthesis)	COG1605(S:Function unknown)	XP_015946156.1(chorismate mutase 1, chloroplastic [Arachis duranensis])	sp|P42738|CM1_ARATH(Chorismate mutase 1, chloroplastic OS=Arabidopsis thaliana OX=3702 GN=CM1 PE=1 SV=3)
Glyur000084s00009477	4.73025	1.67e-10	1.07e-08	yes	up	1.11667	23.5333	0.56	2.01	0.78	11.31	16.43	42.86	Glyur000084s00009477	GO:0008168(molecular_function:methyltransferase activity); GO:0032259(biological_process:methylation)				ENOG410YUR2(S:Function unknown)	GAU36840.1(hypothetical protein TSUD_213640 [Trifolium subterraneum])
Glyur002174s00038642	-1.37278	1.7e-10	1.09e-08	yes	down	8618.46	2605.88	11180.8	6751.02	7923.59	1992.91	2739.73	3084.99	Glyur002174s00038642	GO:0016491(molecular_function:oxidoreductase activity); GO:0000166(molecular_function:nucleotide binding)	K03283	HSPA1s	map05164(Influenza A); map05162(Measles); map05145(Toxoplasmosis); map04010(MAPK signaling pathway); map03040(Spliceosome); map05134(Legionellosis); map04612(Antigen processing and presentation); map04213(Longevity regulating pathway - multiple species); map04144(Endocytosis); map04915(Estrogen signaling pathway); map04141(Protein processing in endoplasmic reticulum)	COG0443(O:Posttranslational modification, protein turnover, chaperones)	XP_007144450.1(hypothetical protein PHAVU_007G157200g [Phaseolus vulgaris])	sp|O65719|HSP7C_ARATH(Heat shock 70 kDa protein 3 OS=Arabidopsis thaliana OX=3702 GN=HSP70-3 PE=1 SV=1)	PF00012.17(HSP70:Hsp70 protein); PF06723.10(MreB_Mbl:MreB/Mbl protein)
Glyur000695s00020661	4.98981	1.74e-10	1.11e-08	yes	up	1.02	24.4967	0.87	1.79	0.4	44.31	22.46	6.72	Glyur000695s00020661	GO:0090501(biological_process:RNA phosphodiester bond hydrolysis); GO:0009817(biological_process:defense response to fungus, incompatible interaction); GO:0004540(molecular_function:ribonuclease activity); GO:0050832(biological_process:defense response to fungus); GO:0008061(molecular_function:chitin binding); GO:0042742(biological_process:defense response to bacterium)				COG3979(G:Carbohydrate transport and metabolism)	PNY04568.1(chitinase/Hevein/PR-4/Wheatwin2 [Trifolium pratense])	sp|P43082|HEVL_ARATH(Hevein-like preproprotein OS=Arabidopsis thaliana OX=3702 GN=HEL PE=1 SV=1)	PF00967.14(Barwin:Barwin family); PF00187.16(Chitin_bind_1:Chitin recognition protein)
Glyur000316s00018263	-1.16223	1.79e-10	1.14e-08	yes	down	335.037	112.563	410.3	288.06	306.75	87.72	133.76	116.21	Glyur000316s00018263					ENOG410Y91B(S:Function unknown)	XP_004508530.1(PREDICTED: uncharacterized protein LOC101492692 [Cicer arietinum])
Glyur006852s00045260	2.89898	1.81e-10	1.15e-08	yes	up	1.28333	6.94333	2.23	0.78	0.84	6.1	6.43	8.3	Glyur006852s00045260					ENOG4111KEV(S:Function unknown)	XP_004503284.1(PREDICTED: thaumatin-like protein [Cicer arietinum])	sp|P50699|TLPH_ARATH(Thaumatin-like protein OS=Arabidopsis thaliana OX=3702 GN=At1g18250 PE=2 SV=2)	PF00314.14(Thaumatin:Thaumatin family); PF16483.2(Glyco_hydro_64:Beta-1,3-glucanase)
Glyur001829s00033200	4.06329	1.82e-10	1.15e-08	yes	up	0.2	2.46333	0.32	0.2	0.08	2.39	2.2	2.8	Glyur001829s00033200	GO:0006004(biological_process:fucose metabolic process); GO:0004560(molecular_function:alpha-L-fucosidase activity); GO:0005975(biological_process:carbohydrate metabolic process); GO:0005773(cellular_component:vacuole)	K01206	FUCA	map00511(Other glycan degradation)	COG3669(G:Carbohydrate transport and metabolism)	GAU15508.1(hypothetical protein TSUD_45450 [Trifolium subterraneum])	sp|Q8GW72|FUCO1_ARATH(Alpha-L-fucosidase 1 OS=Arabidopsis thaliana OX=3702 GN=FUC1 PE=1 SV=2)	PF01120.14(Alpha_L_fucos:Alpha-L-fucosidase)
Glyur000024s00006635	5.66322	1.83e-10	1.16e-08	yes	up	0.613333	23.5167	0.13	0.9	0.81	44.06	21.55	4.94	Glyur000024s00006635	GO:0016021(cellular_component:integral component of membrane); GO:0016717(molecular_function:oxidoreductase activity, acting on paired donors, with oxidation of a pair of donors resulting in the reduction of molecular oxygen to two molecules of water); GO:0055114(biological_process:oxidation-reduction process); GO:0006629(biological_process:lipid metabolic process)	K10256	FAD2	map01040(Biosynthesis of unsaturated fatty acids)	COG3239(I:Lipid transport and metabolism)	XP_013467668.1(delta(12)-fatty-acid desaturase FAD2 [Medicago truncatula])	sp|Q8GZC3|FAD2_VERFO(Delta(12)-fatty-acid desaturase FAD2 OS=Vernicia fordii OX=73154 GN=FAD2 PE=1 SV=1)	PF00487.21(FA_desaturase:Fatty acid desaturase); PF11960.5(DUF3474:Domain of unknown function (DUF3474))
Glyur000125s00010031	7.21106	1.87e-10	1.18e-08	yes	up	0.08	10.03	0	0.24	0	2.9	7.58	19.61	Glyur000125s00010031	GO:0008168(molecular_function:methyltransferase activity); GO:0046983(molecular_function:protein dimerization activity); GO:0008171(molecular_function:O-methyltransferase activity); GO:0032259(biological_process:methylation)				ENOG410XS7T(S:Function unknown)	XP_003601618.1(acetylserotonin O-methyltransferase [Medicago truncatula])	sp|Q9T003|ASMT_ARATH(Acetylserotonin O-methyltransferase OS=Arabidopsis thaliana OX=3702 GN=ASMT PE=1 SV=1)	PF00891.15(Methyltransf_2:O-methyltransferase); PF08100.8(Dimerisation:Dimerisation domain)
Glyur000031s00004424	2.91149	1.89e-10	1.19e-08	yes	up	8.6	46.8267	4.48	10.75	10.57	54.89	44.29	41.3	Glyur000031s00004424	GO:0051603(biological_process:proteolysis involved in cellular protein catabolic process); GO:0005615(cellular_component:extracellular space); GO:0005764(cellular_component:lysosome); GO:0004197(molecular_function:cysteine-type endopeptidase activity); GO:0032440(molecular_function:2-alkenal reductase [NAD(P)] activity); GO:0006508(biological_process:proteolysis); GO:0008233(molecular_function:pe…				COG4870(O:Posttranslational modification, protein turnover, chaperones)	XP_003603086.1(low-temperature-induced cysteine proteinase [Medicago truncatula])	sp|P43297|RD21A_ARATH(Cysteine proteinase RD21A OS=Arabidopsis thaliana OX=3702 GN=RD21A PE=1 SV=1)	PF00112.20(Peptidase_C1:Papain family cysteine protease); PF08246.9(Inhibitor_I29:Cathepsin propeptide inhibitor domain (I29)); PF00396.15(Granulin:Granulin); PF03051.12(Peptidase_C1_2:Peptidase C1-like family)
Glyur001441s00033220	2.96062	1.93e-10	1.21e-08	yes	up	0.633333	3.70667	0.92	0.23	0.75	3.35	3.53	4.24	Glyur001441s00033220	GO:0006952(biological_process:defense response); GO:0030001(biological_process:metal ion transport); GO:0007165(biological_process:signal transduction); GO:0043531(molecular_function:ADP binding); GO:0046872(molecular_function:metal ion binding); GO:0005524(molecular_function:ATP binding)				ENOG4112BMQ(S:Function unknown); ENOG4111VMD(S:Function unknown); COG4886(S:Function unknown)	XP_012568090.1(PREDICTED: uncharacterized protein LOC101494533 [Cicer arietinum])	sp|Q40392|TMVRN_NICGU(TMV resistance protein N OS=Nicotiana glutinosa OX=35889 GN=N PE=1 SV=1)	PF01582.17(TIR:TIR domain); PF13676.3(TIR_2:TIR domain); PF13855.3(LRR_8:Leucine rich repeat); PF00931.19(NB-ARC:NB-ARC domain)
Glyur009011s00047139	7.39943	1.96e-10	1.22e-08	yes	up	0.24	30.9633	0	0.72	0	21.98	26.61	44.3	Glyur009011s00047139						AES67888.1(hypothetical protein MTR_2g100440 [Medicago truncatula])
Glyur000050s00005701	3.663	1.98e-10	1.23e-08	yes	up	0.23	2.22667	0.16	0.29	0.24	2.77	1.99	1.92	Glyur000050s00005701	GO:0006310(biological_process:DNA recombination); GO:0005634(cellular_component:nucleus); GO:0006281(biological_process:DNA repair); GO:0006260(biological_process:DNA replication); GO:0003677(molecular_function:DNA binding)	K07466	RFA1, RPA1, rpa	map03460(Fanconi anemia pathway); map03430(Mismatch repair); map03440(Homologous recombination); map03420(Nucleotide excision repair); map03030(DNA replication)	COG1599(C:Energy production and conversion)	XP_016193495.1(replication protein A 70 kDa DNA-binding subunit B isoform X1 [Arachis ipaensis])	sp|Q9SD82|RFA1B_ARATH(Replication protein A 70 kDa DNA-binding subunit B OS=Arabidopsis thaliana OX=3702 GN=RPA1B PE=3 SV=1)	PF08646.7(Rep_fac-A_C:Replication factor-A C terminal domain); PF16900.2(REPA_OB_2:Replication protein A OB domain); PF04057.9(Rep-A_N:Replication factor-A protein 1, N-terminal domain); PF01336.22(tRNA_anti-codon:OB-fold nucleic acid binding domain); PF02721.11(DUF223:Domain of unknown function DUF223)
Glyur000010s00000916	1.8638	2.02e-10	1.25e-08	yes	up	4.85333	13.1267	5.1	4.55	4.91	14.48	12.81	12.09	Glyur000010s00000916	GO:0005524(molecular_function:ATP binding); GO:0004017(molecular_function:adenylate kinase activity); GO:0046939(biological_process:nucleotide phosphorylation)	K00939	adk, AK	map00730(Thiamine metabolism); map00230(Purine metabolism)	COG0563(F:Nucleotide transport and metabolism)	XP_020216053.1(adenylate kinase 4 [Cajanus cajan])	sp|Q08480|KAD4_ORYSJ(Adenylate kinase 4 OS=Oryza sativa subsp. japonica OX=39947 GN=ADK-B PE=2 SV=1)	PF00406.19(ADK:Adenylate kinase); PF13207.3(AAA_17:AAA domain); PF05191.11(ADK_lid:Adenylate kinase, active site lid)
Glyur000186s00009854	2.06481	2.05e-10	1.27e-08	yes	up	4.24667	13.6067	3.7	4.4	4.64	9.72	13.89	17.21	Glyur000186s00009854	GO:0005975(biological_process:carbohydrate metabolic process); GO:0030246(molecular_function:carbohydrate binding); GO:0016853(molecular_function:isomerase activity)	K06041	kdsD, kpsF	map00540(Lipopolysaccharide biosynthesis)	COG0517(S:Function unknown)	PNY05799.1(putative arabinose 5-phosphate isomerase-like protein [Trifolium pratense])	sp|Q9M1T1|SETH3_ARATH(Probable arabinose 5-phosphate isomerase OS=Arabidopsis thaliana OX=3702 GN=SETH3 PE=2 SV=1)	PF01380.19(SIS:SIS domain); PF00571.25(CBS:CBS domain); PF13580.3(SIS_2:SIS domain)
Glyur000338s00015581	2.67782	2.09e-10	1.29e-08	yes	up	0.316667	1.5	0.42	0.29	0.24	1.55	1.39	1.56	Glyur000338s00015581	GO:0006468(biological_process:protein phosphorylation); GO:0016021(cellular_component:integral component of membrane); GO:0005524(molecular_function:ATP binding); GO:0004672(molecular_function:protein kinase activity)				COG4886(S:Function unknown)	PNY13541.1(LRR receptor-like kinase resistance protein [Trifolium pratense])	sp|C0LGQ9|Y4294_ARATH(Probable LRR receptor-like serine/threonine-protein kinase At4g20940 OS=Arabidopsis thaliana OX=3702 GN=At4g20940 PE=1 SV=1)	PF13855.3(LRR_8:Leucine rich repeat); PF12799.4(LRR_4:Leucine Rich repeats (2 copies)); PF07714.14(Pkinase_Tyr:Protein tyrosine kinase); PF00069.22(Pkinase:Protein kinase domain); PF08263.9(LRRNT_2:Leucine rich repeat N-terminal domain)
Glyur000016s00002998	-1.11545	2.2e-10	1.35e-08	yes	down	45.8367	15.8133	49.92	35.93	51.66	14.78	17.4	15.26	Glyur000016s00002998					COG0457(K:Transcription)	GAU35051.1(hypothetical protein TSUD_30170 [Trifolium subterraneum])	sp|Q9LII8|KLCR2_ARATH(Protein KINESIN LIGHT CHAIN-RELATED 2 OS=Arabidopsis thaliana OX=3702 GN=KLCR2 PE=1 SV=1)	PF13424.3(TPR_12:Tetratricopeptide repeat); PF13374.3(TPR_10:Tetratricopeptide repeat); PF14559.3(TPR_19:Tetratricopeptide repeat)
Glyur000801s00027038	8.05089	2.25e-10	1.38e-08	yes	up	0.01	2.46667	0	0	0.03	2.15	2.76	2.49	Glyur000801s00027038	GO:0016722(molecular_function:oxidoreductase activity, oxidizing metal ions); GO:0052716(molecular_function:hydroquinone:oxygen oxidoreductase activity); GO:0009809(biological_process:lignin biosynthetic process); GO:0048046(cellular_component:apoplast); GO:0046274(biological_process:lignin catabolic process); GO:0005507(molecular_function:copper ion binding); GO:0055114(biological_process:oxidat…	K05909	E1.10.3.2		COG2132(K:Transcription)	KHN20872.1(Laccase-4 [Glycine soja])	sp|O80434|LAC4_ARATH(Laccase-4 OS=Arabidopsis thaliana OX=3702 GN=IRX12 PE=2 SV=2)	PF07731.11(Cu-oxidase_2:Multicopper oxidase); PF00394.19(Cu-oxidase:Multicopper oxidase); PF07732.12(Cu-oxidase_3:Multicopper oxidase)
Glyur000054s00005306	3.01705	2.27e-10	1.39e-08	yes	up	5.14	30.3167	8.75	4.42	2.25	28.45	25.46	37.04	Glyur000054s00005306	GO:0016311(biological_process:dephosphorylation); GO:0003993(molecular_function:acid phosphatase activity)				ENOG410Y9AU(S:Function unknown); ENOG41103R9(S:Function unknown)	XP_020220333.1(acid phosphatase 1 [Cajanus cajan])	sp|P27061|PPA1_SOLLC(Acid phosphatase 1 OS=Solanum lycopersicum OX=4081 GN=APS1 PE=2 SV=1)	PF03767.11(Acid_phosphat_B:HAD superfamily, subfamily IIIB (Acid phosphatase))
Glyur000726s00027882	5.40117	2.37e-10	1.44e-08	yes	up	3.69333	112.143	2.62	0	8.46	95.49	87.03	153.91	Glyur000726s00027882	GO:0004497(molecular_function:monooxygenase activity); GO:0020037(molecular_function:heme binding); GO:0016021(cellular_component:integral component of membrane); GO:0016705(molecular_function:oxidoreductase activity, acting on paired donors, with incorporation or reduction of molecular oxygen); GO:0005506(molecular_function:iron ion binding); GO:0055114(biological_process:oxidation-reduction pro…	K07428	CYP4X	map04726(Serotonergic synapse)	COG2124(Q:Secondary metabolites biosynthesis, transport and catabolism)	BBD13919.1(cytochrome P450 72A566 [Glycyrrhiza uralensis])	sp|Q9LUC5|C7A15_ARATH(Cytochrome P450 72A15 OS=Arabidopsis thaliana OX=3702 GN=CYP72A15 PE=2 SV=1)	PF00067.19(p450:Cytochrome P450)
Glyur000223s00013818	1.20184	2.52e-10	1.53e-08	yes	up	157.707	272.017	161.3	140.09	171.73	281.08	259.53	275.44	Glyur000223s00013818	GO:0005773(cellular_component:vacuole); GO:0016021(cellular_component:integral component of membrane)				ENOG410YP31(S:Function unknown); ENOG410YN13(S:Function unknown)	XP_004504336.1(PREDICTED: uncharacterized protein LOC101510496 [Cicer arietinum])		PF04398.9(DUF538:Protein of unknown function, DUF538)
Glyur004074s00039645	-1.75867	2.54e-10	1.54e-08	yes	down	102.09	22.5933	99.57	87.84	118.86	19.45	30.39	17.94	Glyur004074s00039645	GO:0016021(cellular_component:integral component of membrane)				COG0401(S:Function unknown)	AFK48113.1(unknown [Medicago truncatula])	sp|Q9ZNQ7|RCI2A_ARATH(Hydrophobic protein RCI2A OS=Arabidopsis thaliana OX=3702 GN=RCI2A PE=2 SV=1)	PF01679.14(Pmp3:Proteolipid membrane potential modulator)
Glyur001675s00036196	1.68732	2.65e-10	1.6e-08	yes	up	11.2767	27.0867	11.26	7.77	14.8	27.39	29.73	24.14	Glyur001675s00036196					ENOG410YCYU(S:Function unknown); ENOG41105E6(S:Function unknown)	XP_004499237.1(PREDICTED: filament-like plant protein 4 [Cicer arietinum])	sp|O65649|FPP5_ARATH(Filament-like plant protein 5 OS=Arabidopsis thaliana OX=3702 GN=FPP5 PE=2 SV=2)	PF05911.8(FPP:Filament-like plant protein, long coiled-coil)
Glyur000002s00000301	-1.40835	2.67e-10	1.61e-08	yes	down	59.14	20.13	64.83	46.94	65.65	14.23	23.76	22.4	Glyur000002s00000301		K08827	PRPF4B		ENOG410XPAX(S:Function unknown)	XP_012570219.1(PREDICTED: serine/threonine-protein kinase prpf4B [Cicer arietinum])	sp|Q13523|PRP4B_HUMAN(Serine/threonine-protein kinase PRP4 homolog OS=Homo sapiens OX=9606 GN=PRPF4B PE=1 SV=3)	PF00069.22(Pkinase:Protein kinase domain); PF07714.14(Pkinase_Tyr:Protein tyrosine kinase); PF14531.3(Kinase-like:Kinase-like)
Glyur000197s00010056	1.6686	2.69e-10	1.62e-08	yes	up	25.39	61.2333	23.66	27.18	25.33	56.54	52.69	74.47	Glyur000197s00010056	GO:0004497(molecular_function:monooxygenase activity); GO:0016705(molecular_function:oxidoreductase activity, acting on paired donors, with incorporation or reduction of molecular oxygen); GO:0055114(biological_process:oxidation-reduction process); GO:0005506(molecular_function:iron ion binding); GO:0020037(molecular_function:heme binding)				COG2124(T:Signal transduction mechanisms)	XP_013469565.2(geraniol 8-hydroxylase [Medicago truncatula])	sp|Q8VWZ7|C76B6_CATRO(Geraniol 8-hydroxylase OS=Catharanthus roseus OX=4058 GN=CYP76B6 PE=1 SV=1)	PF00067.19(p450:Cytochrome P450)
Glyur000548s00021030	8.50667	2.78e-10	1.67e-08	yes	up	0	1.78333	0	0	0	2.15	1.43	1.77	Glyur000548s00021030	GO:0071555(biological_process:cell wall organization); GO:0005576(cellular_component:extracellular region); GO:0005975(biological_process:carbohydrate metabolic process); GO:0004650(molecular_function:polygalacturonase activity)				COG5434(M:Cell wall/membrane/envelope biogenesis)	XP_003613215.2(polygalacturonase At1g48100 [Medicago truncatula])	sp|Q949Z1|PGLR4_ARATH(Polygalacturonase At1g48100 OS=Arabidopsis thaliana OX=3702 GN=At1g48100 PE=2 SV=1)	PF00295.14(Glyco_hydro_28:Glycosyl hydrolases family 28); PF12708.4(Pectate_lyase_3:Pectate lyase superfamily protein); PF13229.3(Beta_helix:Right handed beta helix region)
Glyur000615s00024015	8.31275	2.86e-10	1.71e-08	yes	up	0.06	15.4333	0.18	0	0	1.46	11.65	33.19	Glyur000615s00024015	GO:0009664(biological_process:plant-type cell wall organization); GO:0020037(molecular_function:heme binding); GO:0009987(biological_process:cellular process); GO:0004601(molecular_function:peroxidase activity); GO:0098869(biological_process:cellular oxidant detoxification); GO:0042744(biological_process:hydrogen peroxide catabolic process); GO:0009505(cellular_component:plant-type cell wall); GO…	K00430	E1.11.1.7	map00940(Phenylpropanoid biosynthesis)	ENOG410ZMT4(G:Carbohydrate transport and metabolism)	KHN17030.1(Peroxidase 12 [Glycine soja])	sp|Q96520|PER12_ARATH(Peroxidase 12 OS=Arabidopsis thaliana OX=3702 GN=PER12 PE=1 SV=1)	PF00141.20(peroxidase:Peroxidase)
Glyur000023s00004909	1.84906	2.9e-10	1.73e-08	yes	up	5.05	13.6033	4.94	4.75	5.46	15.63	14.61	10.57	Glyur000023s00004909	GO:0035556(biological_process:intracellular signal transduction); GO:0016042(biological_process:lipid catabolic process); GO:0004435(molecular_function:phosphatidylinositol phospholipase C activity); GO:0004871(molecular_function:signal transducer activity); GO:0005622(cellular_component:intracellular)	K05857	PLCD	map04919(Thyroid hormone signaling pathway); map04070(Phosphatidylinositol signaling system); map04020(Calcium signaling pathway); map04933(AGE-RAGE signaling pathway in diabetic complications); map00562(Inositol phosphate metabolism)	ENOG410XPSW(S:Function unknown)	XP_015078474.1(PREDICTED: uncharacterized protein LOC107022350 [Solanum pennellii])	sp|Q39033|PLCD2_ARATH(Phosphoinositide phospholipase C 2 OS=Arabidopsis thaliana OX=3702 GN=PLC2 PE=1 SV=1)	PF00388.16(PI-PLC-X:Phosphatidylinositol-specific phospholipase C, X domain); PF00387.16(PI-PLC-Y:Phosphatidylinositol-specific phospholipase C, Y domain); PF00168.27(C2:C2 domain); PF09279.8(EF-hand_like:Phosphoinositide-specific phospholipase C, efhand-like)
Glyur001723s00036239	8.83358	2.95e-10	1.76e-08	yes	up	0	4.46333	0	0	0	2.14	3.87	7.38	Glyur001723s00036239		K00430	E1.11.1.7	map00940(Phenylpropanoid biosynthesis)	ENOG410YAKJ(G:Carbohydrate transport and metabolism)	CDP06406.1(unnamed protein product [Coffea canephora])	sp|P22195|PER1_ARAHY(Cationic peroxidase 1 OS=Arachis hypogaea OX=3818 GN=PNC1 PE=1 SV=2)	PF00141.20(peroxidase:Peroxidase)
Glyur002038s00029107	2.40158	3e-10	1.78e-08	yes	up	4.94	19.8933	3.62	6.2	5	23.73	18.39	17.56	Glyur002038s00029107	GO:0008289(molecular_function:lipid binding); GO:0005615(cellular_component:extracellular space)				ENOG410Z88E(S:Function unknown)	XP_003617655.2(putative BPI/LBP family protein At1g04970 [Medicago truncatula])	sp|Q9MAU5|Y1049_ARATH(Putative BPI/LBP family protein At1g04970 OS=Arabidopsis thaliana OX=3702 GN=At1g04970 PE=2 SV=1)	PF02886.14(LBP_BPI_CETP_C:LBP / BPI / CETP family, C-terminal domain); PF01273.22(LBP_BPI_CETP:LBP / BPI / CETP family, N-terminal domain)
Glyur000065s00004291	-1.62446	3.26e-10	1.93e-08	yes	down	21.94	5.28667	28.52	17.68	19.62	4.52	6.15	5.19	Glyur000065s00004291	GO:0016021(cellular_component:integral component of membrane)				ENOG4111SCF(I:Lipid transport and metabolism)	XP_020217497.1(cold-regulated 413 plasma membrane protein 1 [Cajanus cajan])	sp|Q9XIM7|CRPM1_ARATH(Cold-regulated 413 plasma membrane protein 1 OS=Arabidopsis thaliana OX=3702 GN=COR413PM1 PE=2 SV=1)	PF05562.8(WCOR413:Cold acclimation protein WCOR413)
Glyur001463s00032090	1.33819	3.28e-10	1.94e-08	yes	up	22.92	43.1833	27.49	21.51	19.76	44.27	40.9	44.38	Glyur001463s00032090	GO:0003824(molecular_function:catalytic activity); GO:0009058(biological_process:biosynthetic process); GO:0030170(molecular_function:pyridoxal phosphate binding)	K15849	PAT, AAT	map00950(Isoquinoline alkaloid biosynthesis); map00960(Tropane, piperidine and pyridine alkaloid biosynthesis); map00400(Phenylalanine, tyrosine and tryptophan biosynthesis); map00360(Phenylalanine metabolism); map00350(Tyrosine metabolism)	COG0436(E:Amino acid transport and metabolism)	GAU19755.1(hypothetical protein TSUD_78810, partial [Trifolium subterraneum])	sp|E9L7A5|PAT_PETHY(Bifunctional aspartate aminotransferase and glutamate/aspartate-prephenate aminotransferase OS=Petunia hybrida OX=4102 PE=1 SV=1)	PF00155.18(Aminotran_1_2:Aminotransferase class I and II); PF01041.14(DegT_DnrJ_EryC1:DegT/DnrJ/EryC1/StrS aminotransferase family); PF00266.16(Aminotran_5:Aminotransferase class-V)
Glyur000332s00014975	-3.83491	3.31e-10	1.95e-08	yes	down	6.05	0.33	12.07	2.1	3.98	0.16	0.37	0.46	Glyur000332s00014975	GO:1902358(biological_process:sulfate transmembrane transport); GO:0008271(molecular_function:secondary active sulfate transmembrane transporter activity); GO:0016021(cellular_component:integral component of membrane); GO:0005887(cellular_component:integral component of plasma membrane); GO:0005886(cellular_component:plasma membrane)	K17470	SULTR1		COG0659(P:Inorganic ion transport and metabolism)	XP_013460839.1(sulfate transporter 1.3 [Medicago truncatula])	sp|Q9FEP7|SUT13_ARATH(Sulfate transporter 1.3 OS=Arabidopsis thaliana OX=3702 GN=SULTR1;3 PE=2 SV=1)	PF00916.17(Sulfate_transp:Sulfate permease family); PF01740.18(STAS:STAS domain); PF13466.3(STAS_2:STAS domain)
Glyur000031s00004434	-1.44018	3.34e-10	1.96e-08	yes	down	214.543	57.8367	267.57	181.85	194.21	42.54	65.79	65.18	Glyur000031s00004434	GO:0006351(biological_process:transcription, DNA-templated)	K09286	EREBP		ENOG410YR77(K:Transcription); ENOG410YR8V(K:Transcription); ENOG41116MV(K:Transcription); ENOG41117TK(K:Transcription)	ACJ66376.1(dehydration responsive element binding protein [Halimodendron halodendron])	sp|Q9FH94|ERF10_ARATH(Ethylene-responsive transcription factor ERF010 OS=Arabidopsis thaliana OX=3702 GN=ERF010 PE=2 SV=1)	PF00847.17(AP2:AP2 domain)
Glyur003372s00040980	4.25183	3.64e-10	2.13e-08	yes	up	3.83	53.72	1.36	2.82	7.31	84.86	48.62	27.68	Glyur003372s00040980						XP_007132237.1(hypothetical protein PHAVU_011G077700g [Phaseolus vulgaris])	sp|Q8LEE9|FLA12_ARATH(Fasciclin-like arabinogalactan protein 12 OS=Arabidopsis thaliana OX=3702 GN=FLA12 PE=2 SV=2)	PF02469.19(Fasciclin:Fasciclin domain)
Glyur000730s00036461	6.23496	3.75e-10	2.19e-08	yes	up	0.08	4.38333	0	0.12	0.12	6.14	4.93	2.08	Glyur000730s00036461		K09422	MYBP		COG5147(K:Transcription)	XP_003538391.1(PREDICTED: protein ODORANT1 [Glycine max])	sp|Q9C7U7|MYB20_ARATH(Transcription factor MYB20 OS=Arabidopsis thaliana OX=3702 GN=MYB20 PE=2 SV=1)	PF00249.28(Myb_DNA-binding:Myb-like DNA-binding domain); PF13921.3(Myb_DNA-bind_6:Myb-like DNA-binding domain)
Glyur000208s00014302	3.03512	3.82e-10	2.22e-08	yes	up	5.56667	32.88	5.3	4.41	6.99	23.27	28.26	47.11	Glyur000208s00014302						XP_004496386.1(PREDICTED: uncharacterized protein LOC101497185 [Cicer arietinum])		PF13456.3(RVT_3:Reverse transcriptase-like)
Glyur000095s00007012	-2.14205	4.02e-10	2.34e-08	yes	down	6.59333	1.13	8.69	5.96	5.13	0.82	1.59	0.98	Glyur000095s00007012	GO:0006468(biological_process:protein phosphorylation); GO:0016020(cellular_component:membrane); GO:0016021(cellular_component:integral component of membrane); GO:0005524(molecular_function:ATP binding); GO:0004672(molecular_function:protein kinase activity)				COG0515(M:Cell wall/membrane/envelope biogenesis)	XP_020222182.1(receptor-like protein kinase [Cajanus cajan])	sp|P93194|RPK1_IPONI(Receptor-like protein kinase OS=Ipomoea nil OX=35883 GN=INRPK1 PE=2 SV=2)	PF00069.22(Pkinase:Protein kinase domain); PF07714.14(Pkinase_Tyr:Protein tyrosine kinase); PF12799.4(LRR_4:Leucine Rich repeats (2 copies)); PF13855.3(LRR_8:Leucine rich repeat); PF08263.9(LRRNT_2:Leucine rich repeat N-terminal domain)
Glyur005634s00046973	8.69792	4.27e-10	2.47e-08	yes	up	0.0433333	11.0067	0	0	0.13	16.49	12.62	3.91	Glyur005634s00046973	GO:0000287(molecular_function:magnesium ion binding); GO:0016829(molecular_function:lyase activity); GO:0046872(molecular_function:metal ion binding); GO:0010333(molecular_function:terpene synthase activity); GO:0008152(biological_process:metabolic process)	K12742	ispS	map00900(Terpenoid backbone biosynthesis)	ENOG410YF98(O:Posttranslational modification, protein turnover, chaperones)	XP_004488753.1(PREDICTED: terpene synthase 10-like isoform X1 [Cicer arietinum])	sp|Q93X23|MYRS_QUEIL(Myrcene synthase, chloroplastic OS=Quercus ilex OX=58334 PE=1 SV=1)	PF01397.18(Terpene_synth:Terpene synthase, N-terminal domain); PF03936.13(Terpene_synth_C:Terpene synthase family, metal binding domain)
Glyur000923s00029694	3.22594	4.44e-10	2.56e-08	yes	up	0.9	5.84333	0.74	0.84	1.12	4.86	4.2	8.47	Glyur000923s00029694	GO:0050662(molecular_function:coenzyme binding); GO:0003824(molecular_function:catalytic activity)				COG0451(M:Cell wall/membrane/envelope biogenesis)	XP_003623719.1(vestitone reductase [Medicago truncatula])	sp|Q40316|VESTR_MEDSA(Vestitone reductase OS=Medicago sativa OX=3879 PE=1 SV=1)	PF01370.18(Epimerase:NAD dependent epimerase/dehydratase family); PF01073.16(3Beta_HSD:3-beta hydroxysteroid dehydrogenase/isomerase family); PF07993.9(NAD_binding_4:Male sterility protein); PF16363.2(GDP_Man_Dehyd:GDP-mannose 4,6 dehydratase); PF13460.3(NAD_binding_10:NAD(P)H-binding)
Glyur005436s00044001	4.40437	4.45e-10	2.56e-08	yes	up	9.50333	159.957	1.45	15.46	11.6	165.47	157.12	157.28	Glyur005436s00044001	GO:0043231(cellular_component:intracellular membrane-bounded organelle); GO:0052696(biological_process:flavonoid glucuronidation); GO:0009813(biological_process:flavonoid biosynthetic process); GO:0080043(molecular_function:quercetin 3-O-glucosyltransferase activity); GO:0016740(molecular_function:transferase activity); GO:0080044(molecular_function:quercetin 7-O-glucosyltransferase activity)	K18823	UGT91H4		COG1819(S:Function unknown)	XP_004485550.1(PREDICTED: soyasaponin III rhamnosyltransferase [Cicer arietinum])	sp|D4Q9Z5|SGT3_SOYBN(Soyasaponin III rhamnosyltransferase OS=Glycine max OX=3847 GN=GmSGT3 PE=1 SV=1)	PF00201.15(UDPGT:UDP-glucoronosyl and UDP-glucosyl transferase)
Glyur004998s00040147	-4.06145	4.55e-10	2.61e-08	yes	down	85.55	3.65667	74.81	59.35	122.49	0.59	5.86	4.52	Glyur004998s00040147	GO:0008375(molecular_function:acetylglucosaminyltransferase activity); GO:0016021(cellular_component:integral component of membrane); GO:0016020(cellular_component:membrane)				ENOG410ZJRX(S:Function unknown); COG5648(S:Function unknown)	XP_019435369.1(PREDICTED: uncharacterized protein LOC109341852 isoform X2 [Lupinus angustifolius])	sp|Q8LDF9|HMGB7_ARATH(High mobility group B protein 7 OS=Arabidopsis thaliana OX=3702 GN=HMGB7 PE=1 SV=1)
Glyur000170s00010987	-2.78534	4.58e-10	2.62e-08	yes	down	123.717	12.7533	155.69	75.77	139.69	6.32	23.01	8.93	Glyur000170s00010987	GO:0006508(biological_process:proteolysis); GO:0016021(cellular_component:integral component of membrane); GO:0004180(molecular_function:carboxypeptidase activity)	K01301	NAALAD		COG2234(S:Function unknown); COG4882(S:Function unknown)	BAM72481.1(AMP1-like carboxypeptidase [Lotus japonicus])	sp|Q9M1S8|GCP2_ARATH(Probable glutamate carboxypeptidase AMP1 OS=Arabidopsis thaliana OX=3702 GN=AMP1 PE=1 SV=3)	PF04253.12(TFR_dimer:Transferrin receptor-like dimerisation domain); PF04389.14(Peptidase_M28:Peptidase family M28); PF02225.19(PA:PA domain)
Glyur001353s00032367	-1.2094	4.59e-10	2.62e-08	yes	down	42.1767	13.77	49.48	36.15	40.9	10.46	16.84	14.01	Glyur001353s00032367	GO:0016311(biological_process:dephosphorylation); GO:0046872(molecular_function:metal ion binding); GO:0009845(biological_process:seed germination); GO:0003993(molecular_function:acid phosphatase activity); GO:0009846(biological_process:pollen germination)				COG1409(S:Function unknown)	NP_001235188.1(phytase precursor [Glycine max])	sp|Q9SFU3|PPA15_ARATH(Purple acid phosphatase 15 OS=Arabidopsis thaliana OX=3702 GN=PAP15 PE=1 SV=1)	PF00149.25(Metallophos:Calcineurin-like phosphoesterase); PF14008.3(Metallophos_C:Iron/zinc purple acid phosphatase-like protein C); PF16656.2(Pur_ac_phosph_N:Purple acid Phosphatase, N-terminal domain)
Glyur000103s00007411	2.11447	4.57e-10	2.62e-08	yes	up	2.36333	7.46333	3.54	1.52	2.03	7.87	7.41	7.11	Glyur000103s00007411	GO:0004563(molecular_function:beta-N-acetylhexosaminidase activity); GO:0005975(biological_process:carbohydrate metabolic process); GO:0008152(biological_process:metabolic process); GO:0004553(molecular_function:hydrolase activity, hydrolyzing O-glycosyl compounds)	K12373	HEXA_B	map00520(Amino sugar and nucleotide sugar metabolism); map00603(Glycosphingolipid biosynthesis - globo and isoglobo series); map00604(Glycosphingolipid biosynthesis - ganglio series); map00511(Other glycan degradation); map00513(Various types of N-glycan biosynthesis); map00531(Glycosaminoglycan degradation); map04142(Lysosome)	COG3525(G:Carbohydrate transport and metabolism)	XP_020207148.1(beta-hexosaminidase 1-like [Cajanus cajan])	sp|A7WM73|HEXO1_ARATH(Beta-hexosaminidase 1 OS=Arabidopsis thaliana OX=3702 GN=HEXO1 PE=1 SV=1)	PF00728.19(Glyco_hydro_20:Glycosyl hydrolase family 20, catalytic domain); PF14845.3(Glycohydro_20b2:beta-acetyl hexosaminidase like)
Glyur000363s00015358	5.0713	4.79e-10	2.72e-08	yes	up	1.09667	30.4	0.15	2.52	0.62	29.29	28.72	33.19	Glyur000363s00015358	GO:0004506(molecular_function:squalene monooxygenase activity); GO:0016021(cellular_component:integral component of membrane); GO:0050660(molecular_function:flavin adenine dinucleotide binding); GO:0055114(biological_process:oxidation-reduction process)	K00511	SQLE, ERG1	map00909(Sesquiterpenoid and triterpenoid biosynthesis); map00100(Steroid biosynthesis)	COG0654(C:Energy production and conversion); COG0654(H:Coenzyme transport and metabolism)	AHY94896.1(squalene epoxidase [Astragalus membranaceus])	sp|O48651|ERG1_PANGI(Squalene monooxygenase OS=Panax ginseng OX=4054 PE=2 SV=1)	PF08491.7(SE:Squalene epoxidase); PF01494.16(FAD_binding_3:FAD binding domain); PF01266.21(DAO:FAD dependent oxidoreductase); PF01134.19(GIDA:Glucose inhibited division protein A); PF13450.3(NAD_binding_8:NAD(P)-binding Rossmann-like domain); PF00890.21(FAD_binding_2:FAD binding domain); PF01946.14(Thi4:Thi4 family); PF07992.11(Pyr_redox_2:Pyridine nucleotide-disulphide oxidoreductase)
Glyur000251s00019379	1.54241	4.81e-10	2.72e-08	yes	up	16.93	37	20.89	13.67	16.23	25.76	41.08	44.16	Glyur000251s00019379	GO:0046912(molecular_function:transferase activity, transferring acyl groups, acyl groups converted into alkyl on transfer); GO:0003824(molecular_function:catalytic activity); GO:0006097(biological_process:glyoxylate cycle); GO:0005737(cellular_component:cytoplasm)				COG2513(G:Carbohydrate transport and metabolism)	XP_014626465.1(PREDICTED: 2,3-dimethylmalate lyase [Glycine max])	sp|Q0QLE4|DML_EUBBA(2,3-dimethylmalate lyase OS=Eubacterium barkeri OX=1528 GN=Dml PE=1 SV=1)	PF13714.3(PEP_mutase:Phosphoenolpyruvate phosphomutase)
Glyur000975s00029566	3.06289	4.86e-10	2.75e-08	yes	up	2.94	19.3833	1.46	4.48	2.88	17.4	16.45	24.3	Glyur000975s00029566	GO:0016310(biological_process:phosphorylation); GO:0016020(cellular_component:membrane); GO:0016301(molecular_function:kinase activity)				ENOG410YAQD(T:Signal transduction mechanisms)	GAU12512.1(hypothetical protein TSUD_182250 [Trifolium subterraneum])	sp|C0LGS3|Y4372_ARATH(Probable LRR receptor-like serine/threonine-protein kinase At4g37250 OS=Arabidopsis thaliana OX=3702 GN=At4g37250 PE=2 SV=1)	PF00069.22(Pkinase:Protein kinase domain); PF07714.14(Pkinase_Tyr:Protein tyrosine kinase); PF12799.4(LRR_4:Leucine Rich repeats (2 copies)); PF13855.3(LRR_8:Leucine rich repeat); PF08263.9(LRRNT_2:Leucine rich repeat N-terminal domain)
Glyur000544s00017416	4.31302	5.05e-10	2.85e-08	yes	up	1.10667	16.9233	1	1.53	0.79	7.5	12.54	30.73	Glyur000544s00017416	GO:0050832(biological_process:defense response to fungus); GO:0042742(biological_process:defense response to bacterium)				COG3979(M:Cell wall/membrane/envelope biogenesis)	XP_013468976.1(pathogenesis-related protein PR-4 [Medicago truncatula])	sp|P29062|PR4A_TOBAC(Pathogenesis-related protein PR-4A OS=Nicotiana tabacum OX=4097 PE=2 SV=1)	PF00967.14(Barwin:Barwin family)
Glyur000346s00018187	1.5954	5.37e-10	3.02e-08	yes	up	75.2567	173.133	67.22	77.47	81.08	145.34	159.82	214.24	Glyur000346s00018187	GO:0016787(molecular_function:hydrolase activity)	K19882	NOTUM	map04310(Wnt signaling pathway)	ENOG410XQKD(S:Function unknown)	XP_004509522.1(PREDICTED: pectin acetylesterase 8-like [Cicer arietinum])	sp|Q6DBP4|PAE8_ARATH(Pectin acetylesterase 8 OS=Arabidopsis thaliana OX=3702 GN=PAE8 PE=2 SV=1)	PF03283.10(PAE:Pectinacetylesterase)
Glyur000202s00015384	1.67803	5.55e-10	3.11e-08	yes	up	2.13	5.15667	2.43	2.27	1.69	4.67	5.19	5.61	Glyur000202s00015384	GO:0016787(molecular_function:hydrolase activity); GO:0097159(molecular_function:organic cyclic compound binding); GO:0004386(molecular_function:helicase activity); GO:0043167(molecular_function:ion binding); GO:0003676(molecular_function:nucleic acid binding); GO:0046872(molecular_function:metal ion binding); GO:1901363(molecular_function:heterocyclic compound binding); GO:0005524(molecular_func…				COG1643(I:Lipid transport and metabolism)	XP_003591531.2(DExH-box ATP-dependent RNA helicase DExH8 [Medicago truncatula])	sp|O22243|C3H31_ARATH(DExH-box ATP-dependent RNA helicase DExH8 OS=Arabidopsis thaliana OX=3702 GN=At2g47680 PE=2 SV=2)	PF00271.28(Helicase_C:Helicase conserved C-terminal domain); PF00642.21(zf-CCCH:Zinc finger C-x8-C-x5-C-x3-H type (and similar)); PF00270.26(DEAD:DEAD/DEAH box helicase); PF14608.3(zf-CCCH_2:RNA-binding, Nab2-type zinc finger); PF10354.6(DUF2431:Domain of unknown function (DUF2431))
Glyur000159s00010269	4.24953	5.64e-10	3.15e-08	yes	up	0.116667	1.92333	0.18	0.07	0.1	1.71	1.81	2.25	Glyur000159s00010269	GO:0016021(cellular_component:integral component of membrane); GO:0016788(molecular_function:hydrolase activity, acting on ester bonds)	K01206	FUCA	map00511(Other glycan degradation)	ENOG410Y9BR(S:Function unknown)	XP_003554066.1(PREDICTED: GDSL esterase/lipase At3g26430 [Glycine max])	sp|Q9LIN2|GDL53_ARATH(GDSL esterase/lipase At3g26430 OS=Arabidopsis thaliana OX=3702 GN=At3g26430 PE=2 SV=1)	PF00657.19(Lipase_GDSL:GDSL-like Lipase/Acylhydrolase)
Glyur000011s00000718	1.59768	6.15e-10	3.43e-08	yes	up	7.89	18.16	8.48	8.78	6.41	16.34	17.82	20.32	Glyur000011s00000718	GO:0006468(biological_process:protein phosphorylation); GO:0016021(cellular_component:integral component of membrane); GO:0004674(molecular_function:protein serine/threonine kinase activity); GO:0007166(biological_process:cell surface receptor signaling pathway); GO:0005886(cellular_component:plasma membrane); GO:0005524(molecular_function:ATP binding)				COG0515(T:Signal transduction mechanisms)	XP_004501050.1(PREDICTED: wall-associated receptor kinase-like 14 [Cicer arietinum])	sp|Q8RY67|WAKLO_ARATH(Wall-associated receptor kinase-like 14 OS=Arabidopsis thaliana OX=3702 GN=WAKL14 PE=2 SV=2)	PF07714.14(Pkinase_Tyr:Protein tyrosine kinase); PF00069.22(Pkinase:Protein kinase domain); PF12947.4(EGF_3:EGF domain); PF13947.3(GUB_WAK_bind:Wall-associated receptor kinase galacturonan-binding)
Glyur001663s00027487	6.5669	6.18e-10	3.44e-08	yes	up	0.176667	19.2667	0.19	0.34	0	26.64	21.19	9.97	Glyur001663s00027487	GO:0006633(biological_process:fatty acid biosynthetic process); GO:0044710(biological_process:single-organism metabolic process); GO:0051213(molecular_function:dioxygenase activity); GO:0016491(molecular_function:oxidoreductase activity)	K15718	LOX1_5	map00591(Linoleic acid metabolism)	ENOG410YN4N(S:Function unknown); ENOG410XT0Q(O:Posttranslational modification, protein turnover, chaperones)	XP_014634584.1(PREDICTED: linoleate 9S-lipoxygenase-like [Glycine max])	sp|P09918|LOX3_PEA(Seed linoleate 9S-lipoxygenase-3 OS=Pisum sativum OX=3888 GN=LOX1.3 PE=2 SV=1)
Glyur000141s00009828	-1.34645	6.5e-10	3.6e-08	yes	down	73.6367	21.4867	90.28	49.18	81.45	18.32	23.41	22.73	Glyur000141s00009828	GO:0004004(molecular_function:ATP-dependent RNA helicase activity); GO:0010501(biological_process:RNA secondary structure unwinding); GO:0005524(molecular_function:ATP binding); GO:0003676(molecular_function:nucleic acid binding); GO:0004386(molecular_function:helicase activity)				COG0513(L:Replication, recombination and repair)	XP_004491264.1(PREDICTED: DEAD-box ATP-dependent RNA helicase 53-like [Cicer arietinum])	sp|Q9LUW5|RH53_ARATH(DEAD-box ATP-dependent RNA helicase 53, mitochondrial OS=Arabidopsis thaliana OX=3702 GN=RH53 PE=1 SV=1)	PF00270.26(DEAD:DEAD/DEAH box helicase); PF00271.28(Helicase_C:Helicase conserved C-terminal domain); PF04851.12(ResIII:Type III restriction enzyme, res subunit); PF14617.3(CMS1:U3-containing 90S pre-ribosomal complex subunit); PF16203.2(ERCC3_RAD25_C:ERCC3/RAD25/XPB C-terminal helicase)
Glyur000278s00017290	-1.37639	6.84e-10	3.78e-08	yes	down	82.88	23.6767	108.03	55.04	85.57	19.05	28.26	23.72	Glyur000278s00017290	GO:0003723(molecular_function:RNA binding)	K21444	PCBP3_4		ENOG410XNN8(S:Function unknown)	KHN12447.1(KH domain-containing protein [Glycine soja])	sp|P58223|Y4837_ARATH(KH domain-containing protein At4g18375 OS=Arabidopsis thaliana OX=3702 GN=At4g18375 PE=2 SV=1)	PF00013.26(KH_1:KH domain); PF13083.3(KH_4:KH domain); PF07650.14(KH_2:KH domain)
Glyur000068s00006859	2.72508	6.93e-10	3.82e-08	yes	up	2.39667	12.3633	1.34	2.78	3.07	9.04	11.63	16.42	Glyur000068s00006859					COG2335(M:Cell wall/membrane/envelope biogenesis)	XP_004506247.1(PREDICTED: fasciclin-like arabinogalactan protein 15 [Cicer arietinum])	sp|Q9FT45|FLA15_ARATH(Fasciclin-like arabinogalactan protein 15 OS=Arabidopsis thaliana OX=3702 GN=FLA15 PE=2 SV=1)	PF02469.19(Fasciclin:Fasciclin domain)
Glyur000064s00005605	3.08523	7.15e-10	3.93e-08	yes	up	1.21333	7.76	0.93	1.33	1.38	7.67	5.74	9.87	Glyur000064s00005605					COG5048(S:Function unknown)	XP_004508907.1(PREDICTED: zinc finger protein ZAT9-like [Cicer arietinum])	sp|Q9M202|ZAT9_ARATH(Zinc finger protein ZAT9 OS=Arabidopsis thaliana OX=3702 GN=ZAT9 PE=2 SV=1)	PF13912.3(zf-C2H2_6:C2H2-type zinc finger); PF13894.3(zf-C2H2_4:C2H2-type zinc finger); PF12171.5(zf-C2H2_jaz:Zinc-finger double-stranded RNA-binding); PF00096.23(zf-C2H2:Zinc finger, C2H2 type); PF13465.3(zf-H2C2_2:Zinc-finger double domain)
Glyur001726s00035057	2.39948	7.24e-10	3.97e-08	yes	up	8.33	34.0467	5.93	10.86	8.2	26.43	32.24	43.47	Glyur001726s00035057	GO:0005794(cellular_component:Golgi apparatus); GO:0016021(cellular_component:integral component of membrane); GO:0000271(biological_process:polysaccharide biosynthetic process); GO:0016757(molecular_function:transferase activity, transferring glycosyl groups)				ENOG410YG1M(M:Cell wall/membrane/envelope biogenesis); ENOG410YCH5(M:Cell wall/membrane/envelope biogenesis)	PNY17579.1(putative galacturonosyltransferase 3-like protein [Trifolium pratense])	sp|Q0V7R1|GATL3_ARATH(Probable galacturonosyltransferase-like 3 OS=Arabidopsis thaliana OX=3702 GN=GATL3 PE=2 SV=1)	PF01501.17(Glyco_transf_8:Glycosyl transferase family 8)
Glyur000197s00010078	1.54842	7.33e-10	4.02e-08	yes	up	6.34667	14.02	5.9	6.45	6.69	14.9	14.21	12.95	Glyur000197s00010078	GO:0005737(cellular_component:cytoplasm); GO:0003723(molecular_function:RNA binding); GO:0000166(molecular_function:nucleotide binding)	K13126	PABPC	map03018(RNA degradation); map03013(RNA transport); map03015(mRNA surveillance pathway)	ENOG410XR5X(S:Function unknown)	XP_004496416.1(PREDICTED: polyadenylate-binding protein 3-like isoform X2 [Cicer arietinum])	sp|O64380|PABP3_ARATH(Polyadenylate-binding protein 3 OS=Arabidopsis thaliana OX=3702 GN=PAB3 PE=2 SV=1)	PF00076.19(RRM_1:RNA recognition motif. (a.k.a. RRM, RBD, or RNP domain)); PF00658.15(PABP:Poly-adenylate binding protein, unique domain); PF16842.2(RRM_occluded:Occluded RNA-recognition motif)
Glyur000169s00018366	3.01989	7.41e-10	4.05e-08	yes	up	1.58	9.76667	1.31	1.44	1.99	6.04	7.41	15.85	Glyur000169s00018366	GO:0071554(biological_process:cell wall organization or biogenesis); GO:0005794(cellular_component:Golgi apparatus); GO:0016413(molecular_function:O-acetyltransferase activity)				ENOG410YF78(S:Function unknown)	XP_003544889.3(PREDICTED: protein PMR5-like [Glycine max])	sp|Q9LUZ6|TBL44_ARATH(Protein PMR5 OS=Arabidopsis thaliana OX=3702 GN=PMR5 PE=2 SV=1)	PF13839.3(PC-Esterase:GDSL/SGNH-like Acyl-Esterase family found in Pmr5 and Cas1p); PF14416.3(PMR5N:PMR5 N terminal Domain)
Glyur002378s00036060	-9.41945	7.52e-10	4.1e-08	yes	down	4.8	0	10.55	0.93	2.92	0	0	0	Glyur002378s00036060					ENOG410Z7Z7(K:Transcription)	XP_007134710.1(hypothetical protein PHAVU_010G069800g [Phaseolus vulgaris])	sp|Q9M2A1|PP263_ARATH(Pentatricopeptide repeat-containing protein At3g42630 OS=Arabidopsis thaliana OX=3702 GN=At3g42630 PE=2 SV=2)	PF13041.3(PPR_2:PPR repeat family); PF01535.17(PPR:PPR repeat)
Glyur000324s00015435	-3.90325	7.62e-10	4.14e-08	yes	down	19.4333	0.956667	31.89	7.8	18.61	0.5	1.83	0.54	Glyur000324s00015435					COG0724(G:Carbohydrate transport and metabolism); ENOG410YUEW(S:Function unknown); ENOG410YU1Q(S:Function unknown)	XP_017438875.1(PREDICTED: uncharacterized protein LOC108344867 [Vigna angularis])
Glyur000008s00001346	3.74529	7.77e-10	4.21e-08	yes	up	5.78333	64.1567	2.54	11.45	3.36	67.04	61.65	63.78	Glyur000008s00001346	GO:0031408(biological_process:oxylipin biosynthetic process); GO:0046872(molecular_function:metal ion binding); GO:0016702(molecular_function:oxidoreductase activity, acting on single donors with incorporation of molecular oxygen, incorporation of two atoms of oxygen); GO:0055114(biological_process:oxidation-reduction process)	K15718	LOX1_5	map00591(Linoleic acid metabolism)	ENOG410YN4N(C:Energy production and conversion)	XP_024626154.1(linoleate 9S-lipoxygenase 5 [Medicago truncatula])	sp|Q9LUW0|LOX5_ARATH(Linoleate 9S-lipoxygenase 5 OS=Arabidopsis thaliana OX=3702 GN=LOX5 PE=2 SV=2)	PF00305.16(Lipoxygenase:Lipoxygenase); PF01477.20(PLAT:PLAT/LH2 domain)
Glyur000476s00022382	1.56357	7.8e-10	4.22e-08	yes	up	47.9533	105.513	60.12	30.43	53.31	91.88	104.26	120.4	Glyur000476s00022382					ENOG41118ZB(S:Function unknown); ENOG410YQ91(S:Function unknown)	XP_003538379.2(PREDICTED: uncharacterized protein LOC100797065 [Glycine max])	sp|Q6NLW5|XRI1_ARATH(Protein XRI1 OS=Arabidopsis thaliana OX=3702 GN=XRI1 PE=1 SV=2)
Glyur001924s00034864	5.59768	7.93e-10	4.28e-08	yes	up	0.0733333	2.57333	0	0.04	0.18	3.81	2.47	1.44	Glyur001924s00034864	GO:0016020(cellular_component:membrane); GO:0009987(biological_process:cellular process); GO:0016757(molecular_function:transferase activity, transferring glycosyl groups)	K10999	CESA		COG1215(M:Cell wall/membrane/envelope biogenesis)	XP_019415365.1(PREDICTED: cellulose synthase A catalytic subunit 7 [UDP-forming]-like isoform X1 [Lupinus angustifolius])	sp|Q69P51|CESA9_ORYSJ(Cellulose synthase A catalytic subunit 9 [UDP-forming] OS=Oryza sativa subsp. japonica OX=39947 GN=CESA9 PE=2 SV=1)	PF03552.11(Cellulose_synt:Cellulose synthase); PF14569.3(zf-UDP:Zinc-binding RING-finger); PF13632.3(Glyco_trans_2_3:Glycosyl transferase family group 2); PF14570.3(zf-RING_4:RING/Ubox like zinc-binding domain); PF02318.13(FYVE_2:FYVE-type zinc finger)
Glyur000001s00000014	4.77846	8.33e-10	4.48e-08	yes	up	0.746667	16.9967	0.17	1.48	0.59	12.6	29.91	8.48	Glyur000001s00000014					ENOG41103SF(K:Transcription); ENOG410YG6S(K:Transcription); ENOG41118GE(K:Transcription)	BBD13918.1(bHLH transcription factor 3 [Glycyrrhiza uralensis])	sp|Q9T072|BH025_ARATH(Transcription factor bHLH25 OS=Arabidopsis thaliana OX=3702 GN=BHLH25 PE=2 SV=2)	PF00010.23(HLH:Helix-loop-helix DNA-binding domain)
Glyur001780s00035664	5.15831	8.34e-10	4.48e-08	yes	up	0.306667	7.91667	0.22	0	0.7	8	5.72	10.03	Glyur001780s00035664	GO:0016020(cellular_component:membrane)				ENOG41114QR(M:Cell wall/membrane/envelope biogenesis)	AFK33714.1(unknown [Lotus japonicus])	sp|Q8LEE9|FLA12_ARATH(Fasciclin-like arabinogalactan protein 12 OS=Arabidopsis thaliana OX=3702 GN=FLA12 PE=2 SV=2)	PF02469.19(Fasciclin:Fasciclin domain)
Glyur000275s00017067	-3.51096	8.5e-10	4.55e-08	yes	down	48.7867	3.57333	45.75	47.69	52.92	1.11	6.8	2.81	Glyur000275s00017067	GO:0005643(cellular_component:nuclear pore); GO:0016973(biological_process:poly(A)+ mRNA export from nucleus); GO:0017056(molecular_function:structural constituent of nuclear pore); GO:0006606(biological_process:protein import into nucleus); GO:0051292(biological_process:nuclear pore complex assembly)	K14309	NUP93, NIC96	map03013(RNA transport)	ENOG410XPN3(U:Intracellular trafficking, secretion, and vesicular transport)	XP_007150722.1(hypothetical protein PHAVU_005G175500g [Phaseolus vulgaris])	sp|F4J284|NU93B_ARATH(Nuclear pore complex protein NUP93B OS=Arabidopsis thaliana OX=3702 GN=NUP93B PE=1 SV=1)
Glyur000605s00024928	-2.15383	8.81e-10	4.71e-08	yes	down	50.0067	8.62	49.35	51.2	49.47	4.6	10.55	10.71	Glyur000605s00024928	GO:0003723(molecular_function:RNA binding)				ENOG410XR0Z(G:Carbohydrate transport and metabolism); ENOG410Y8GY(S:Function unknown); ENOG4111G2K(S:Function unknown); ENOG410Z2MJ(S:Function unknown)	GAU31350.1(hypothetical protein TSUD_315600 [Trifolium subterraneum])	sp|O82199|C3H20_ARATH(Zinc finger CCCH domain-containing protein 20 OS=Arabidopsis thaliana OX=3702 GN=At2g19810 PE=2 SV=1)	PF00642.21(zf-CCCH:Zinc finger C-x8-C-x5-C-x3-H type (and similar))
Glyur001230s00027577	1.87387	9.41e-10	5.02e-08	yes	up	5.65667	15.2067	6.66	4.46	5.85	16.64	15.46	13.52	Glyur001230s00027577					ENOG410YDTS(S:Function unknown)	PNY14453.1(hypothetical protein L195_g011134, partial [Trifolium pratense])	sp|Q9M015|Y5161_ARATH(Uncharacterized protein At5g01610 OS=Arabidopsis thaliana OX=3702 GN=At5g01610 PE=1 SV=1)	PF04398.9(DUF538:Protein of unknown function, DUF538)
Glyur001814s00036627	2.33306	9.72e-10	5.16e-08	yes	up	2.66333	10.0867	1.91	3.17	2.91	11.02	8.24	11	Glyur001814s00036627	GO:0003824(molecular_function:catalytic activity); GO:0006284(biological_process:base-excision repair); GO:0008725(molecular_function:DNA-3-methyladenine glycosylase activity); GO:0006281(biological_process:DNA repair)	K01246	tag	map03410(Base excision repair)	COG2818(L:Replication, recombination and repair)	KOM32885.1(hypothetical protein LR48_Vigan01g244100 [Vigna angularis])	sp|Q7VG78|GUAA_HELHP(Probable GMP synthase [glutamine-hydrolyzing] OS=Helicobacter hepaticus (strain ATCC 51449 / 3B1) OX=235279 GN=guaA PE=3 SV=1)	PF03352.10(Adenine_glyco:Methyladenine glycosylase)
Glyur000849s00021635	2.09085	9.7e-10	5.16e-08	yes	up	28.1733	88.4733	25.36	20.91	38.25	111.16	84.96	69.3	Glyur000849s00021635	GO:0005737(cellular_component:cytoplasm); GO:0007017(biological_process:microtubule-based process); GO:0003924(molecular_function:GTPase activity); GO:0005200(molecular_function:structural constituent of cytoskeleton); GO:0005874(cellular_component:microtubule); GO:0005525(molecular_function:GTP binding)	K07374	TUBA	map04145(Phagosome); map04210(Apoptosis); map04540(Gap junction); map04530(Tight junction); map05130(Pathogenic Escherichia coli infection)	COG5023(S:Function unknown)	XP_004496862.1(PREDICTED: tubulin alpha chain [Cicer arietinum])	sp|P33629|TBA_PRUDU(Tubulin alpha chain OS=Prunus dulcis OX=3755 GN=TUBA PE=2 SV=1)	PF00091.22(Tubulin:Tubulin/FtsZ family, GTPase domain); PF03953.14(Tubulin_C:Tubulin C-terminal domain)
Glyur000376s00018690	-1.50913	9.84e-10	5.21e-08	yes	down	55.7	15.11	72.45	46.36	48.29	12.78	19.81	12.74	Glyur000376s00018690	GO:0005737(cellular_component:cytoplasm); GO:0005634(cellular_component:nucleus); GO:0009738(biological_process:abscisic acid-activated signaling pathway); GO:0080163(biological_process:regulation of protein serine/threonine phosphatase activity); GO:0004864(molecular_function:protein phosphatase inhibitor activity); GO:0004872(molecular_function:receptor activity); GO:0043086(biological_process:…	K14496	PYL	map04016(MAPK signaling pathway - plant); map04075(Plant hormone signal transduction)	ENOG4111HU5(S:Function unknown)	XP_003541499.1(PREDICTED: abscisic acid receptor PYL8-like [Glycine max])	sp|Q9FGM1|PYL8_ARATH(Abscisic acid receptor PYL8 OS=Arabidopsis thaliana OX=3702 GN=PYL8 PE=1 SV=1)	PF10604.6(Polyketide_cyc2:Polyketide cyclase / dehydrase and lipid transport)
Glyur000008s00001328	-1.56583	1.01e-09	5.33e-08	yes	down	44.0533	11.6133	56.16	35.95	40.05	10.04	14.43	10.37	Glyur000008s00001328	GO:0010207(biological_process:photosystem II assembly); GO:0010206(biological_process:photosystem II repair); GO:0009543(cellular_component:chloroplast thylakoid lumen)				ENOG4111U0T(S:Function unknown)	XP_004496724.1(PREDICTED: photosystem II D1 precursor processing protein PSB27-H2, chloroplastic [Cicer arietinum])	sp|Q9ZVZ9|PB27B_ARATH(Photosystem II D1 precursor processing protein PSB27-H2, chloroplastic OS=Arabidopsis thaliana OX=3702 GN=PSB27-2 PE=1 SV=1)	PF13326.3(PSII_Pbs27:Photosystem II Pbs27)
Glyur002910s00040632	-1.48091	1.1e-09	5.8e-08	yes	down	36.6533	10.6833	41.07	27.54	41.35	6.01	11.58	14.46	Glyur002910s00040632					ENOG410ZAV5(S:Function unknown); ENOG4111DF7(S:Function unknown)	XP_003521678.1(PREDICTED: unknown protein 1-like [Glycine max])
Glyur000038s00004477	4.64587	1.12e-09	5.87e-08	yes	up	0.193333	3.66333	0.15	0.36	0.07	2.86	2.95	5.18	Glyur000038s00004477	GO:0008270(molecular_function:zinc ion binding); GO:0055114(biological_process:oxidation-reduction process); GO:0016491(molecular_function:oxidoreductase activity)	K00121	frmA, ADH5, adhC	map05204(Chemical carcinogenesis); map00350(Tyrosine metabolism); map00980(Metabolism of xenobiotics by cytochrome P450); map00626(Naphthalene degradation); map00625(Chloroalkane and chloroalkene degradation); map00680(Methane metabolism); map00010(Glycolysis / Gluconeogenesis); map00830(Retinol metabolism); map00071(Fatty acid degradation); map00982(Drug metabolism - cytochrome P450)	COG1062(O:Posttranslational modification, protein turnover, chaperones)	XP_003602833.1(alcohol dehydrogenase-like 2 isoform X1 [Medicago truncatula])	sp|Q9SK87|ADHL2_ARATH(Alcohol dehydrogenase-like 2 OS=Arabidopsis thaliana OX=3702 GN=At1g22440 PE=2 SV=1)	PF00107.23(ADH_zinc_N:Zinc-binding dehydrogenase); PF08240.9(ADH_N:Alcohol dehydrogenase GroES-like domain); PF03721.11(UDPG_MGDP_dh_N:UDP-glucose/GDP-mannose dehydrogenase family, NAD binding domain); PF02826.16(2-Hacid_dh_C:D-isomer specific 2-hydroxyacid dehydrogenase, NAD binding domain)
Glyur000023s00004935	-1.91202	1.2e-09	6.28e-08	yes	down	27.4233	5.58667	32.08	27.54	22.65	3.94	8.14	4.68	Glyur000023s00004935					ENOG4111RQ5(S:Function unknown); ENOG411159Z(S:Function unknown)	KHN48550.1(hypothetical protein glysoja_034173 [Glycine soja])
Glyur000039s00004253	7.446	1.33e-09	6.96e-08	yes	up	0.0533333	8.04667	0	0.16	0	3.76	6.63	13.75	Glyur000039s00004253					ENOG410YX6S(S:Function unknown)	XP_003621784.1(uncharacterized protein LOC11446852 [Medicago truncatula])		PF09713.7(A_thal_3526:Plant protein 1589 of unknown function (A_thal_3526))
Glyur001022s00033090	1.74796	1.39e-09	7.24e-08	yes	up	4.79667	12.0467	5.15	3.77	5.47	8.41	11.69	16.04	Glyur001022s00033090					COG4886(S:Function unknown); COG1062(S:Function unknown)	XP_006578320.1(PREDICTED: uncharacterized protein LOC100813969 isoform X2 [Glycine max])	sp|Q6NRC9|LRCC1_XENLA(Leucine-rich repeat and coiled-coil domain-containing protein 1 OS=Xenopus laevis OX=8355 GN=lrrcc1 PE=2 SV=1)	PF12799.4(LRR_4:Leucine Rich repeats (2 copies)); PF13855.3(LRR_8:Leucine rich repeat); PF14580.3(LRR_9:Leucine-rich repeat)
Glyur000053s00006481	1.90702	1.41e-09	7.35e-08	yes	up	9.66	27.7367	8.51	8.06	12.41	30.48	24.72	28.01	Glyur000053s00006481	GO:0005622(cellular_component:intracellular); GO:0007264(biological_process:small GTPase mediated signal transduction); GO:0005525(molecular_function:GTP binding)	K07955	ARL8		ENOG410XNUK(S:Function unknown)	XP_020204880.1(ADP-ribosylation factor-like protein 8a [Cajanus cajan])	sp|Q93Y31|ARL8B_ARATH(ADP-ribosylation factor-like protein 8b OS=Arabidopsis thaliana OX=3702 GN=ARL8B PE=2 SV=1)	PF00025.18(Arf:ADP-ribosylation factor family); PF08477.10(Roc:Ras of Complex, Roc, domain of DAPkinase); PF00071.19(Ras:Ras family); PF04670.9(Gtr1_RagA:Gtr1/RagA G protein conserved region); PF00503.17(G-alpha:G-protein alpha subunit); PF01926.20(MMR_HSR1:50S ribosome-binding GTPase); PF09439.7(SRPRB:Signal recognition particle receptor beta subunit)
Glyur004195s00046211	2.27299	1.42e-09	7.36e-08	yes	up	16.91	58.6067	26.56	8.99	15.18	51.92	52.14	71.76	Glyur004195s00046211	GO:0008757(molecular_function:S-adenosylmethionine-dependent methyltransferase activity); GO:0005829(cellular_component:cytosol); GO:0008171(molecular_function:O-methyltransferase activity); GO:0008168(molecular_function:methyltransferase activity); GO:0019438(biological_process:aromatic compound biosynthetic process); GO:0046983(molecular_function:protein dimerization activity); GO:0032259(biolo…	K13066	E2.1.1.68, COMT	map00940(Phenylpropanoid biosynthesis)	ENOG410XS7T(S:Function unknown)	XP_013466818.1(isoliquiritigenin 2'-O-methyltransferase [Medicago truncatula])	sp|P93324|CHOMT_MEDSA(Isoliquiritigenin 2'-O-methyltransferase OS=Medicago sativa OX=3879 PE=1 SV=1)	PF00891.15(Methyltransf_2:O-methyltransferase)
Glyur004941s00042208	-1.18576	1.52e-09	7.88e-08	yes	down	47.21	15.6333	58.34	39.47	43.82	11.84	18.55	16.51	Glyur004941s00042208		K12125	ELF3	map04712(Circadian rhythm - plant)	ENOG4111XSP(S:Function unknown); ENOG410YXT5(S:Function unknown)	XP_004501482.1(PREDICTED: protein EARLY FLOWERING 3-like [Cicer arietinum])	sp|O82804|ELF3_ARATH(Protein EARLY FLOWERING 3 OS=Arabidopsis thaliana OX=3702 GN=ELF3 PE=1 SV=1)
Glyur000421s00024803	3.02315	1.58e-09	8.14e-08	yes	up	2.79333	19.4567	1.33	4.49	2.56	13.35	14.39	30.63	Glyur000421s00024803	GO:0016021(cellular_component:integral component of membrane); GO:0016020(cellular_component:membrane); GO:0005886(cellular_component:plasma membrane)				ENOG411140T(S:Function unknown)	XP_004492988.1(PREDICTED: CASP-like protein 1F2 [Cicer arietinum])	sp|B9GFG6|CSPLF_POPTR(CASP-like protein 1F3 OS=Populus trichocarpa OX=3694 GN=POPTRDRAFT_752786 PE=3 SV=1)
Glyur001824s00042141	2.29623	1.6e-09	8.24e-08	yes	up	1.4	4.52	2.16	0.9	1.14	3.55	4.33	5.68	Glyur001824s00042141					ENOG410ZUGM(S:Function unknown); ENOG411143Q(S:Function unknown); ENOG41108QU(S:Function unknown); ENOG410ZC2N(S:Function unknown)	PNY13883.1(F-box/LRR-repeat protein [Trifolium pratense])	sp|Q9LUC4|FDL43_ARATH(F-box/FBD/LRR-repeat protein At3g14710 OS=Arabidopsis thaliana OX=3702 GN=At3g14710 PE=2 SV=1)	PF08387.7(FBD:FBD)
Glyur005513s00046322	8.06541	1.61e-09	8.28e-08	yes	up	0.136667	29.2667	0	0.41	0	26.74	17.95	43.11	Glyur005513s00046322
Glyur007123s00046226	7.72961	1.67e-09	8.55e-08	yes	up	2.66667	463.017	0.11	6.37	1.52	527.99	467.9	393.16	Glyur007123s00046226	GO:0016829(molecular_function:lyase activity); GO:0046872(molecular_function:metal ion binding)	K12742	ispS	map00900(Terpenoid backbone biosynthesis)	ENOG410YF98(O:Posttranslational modification, protein turnover, chaperones)	XP_004488753.1(PREDICTED: terpene synthase 10-like isoform X1 [Cicer arietinum])	sp|Q93X23|MYRS_QUEIL(Myrcene synthase, chloroplastic OS=Quercus ilex OX=58334 PE=1 SV=1)	PF01397.18(Terpene_synth:Terpene synthase, N-terminal domain)
Glyur000029s00003641	6.4562	1.67e-09	8.55e-08	yes	up	0.0533333	3.53667	0	0	0.16	4.41	3.79	2.41	Glyur000029s00003641	GO:0071554(biological_process:cell wall organization or biogenesis); GO:0005794(cellular_component:Golgi apparatus); GO:0016413(molecular_function:O-acetyltransferase activity)				ENOG4111BK6(S:Function unknown); ENOG410YAJT(S:Function unknown); ENOG41118PY(S:Function unknown)	XP_004500006.1(PREDICTED: protein trichome birefringence-like 43 [Cicer arietinum])	sp|Q6DR10|TBL43_ARATH(Protein trichome birefringence-like 43 OS=Arabidopsis thaliana OX=3702 GN=TBL43 PE=2 SV=1)	PF13839.3(PC-Esterase:GDSL/SGNH-like Acyl-Esterase family found in Pmr5 and Cas1p); PF14416.3(PMR5N:PMR5 N terminal Domain)
Glyur001227s00038491	3.82439	1.68e-09	8.57e-08	yes	up	3.88	33.3333	3.48	4.1	4.06	47.97	38.31	13.72	Glyur001227s00038491					ENOG410Y65V(S:Function unknown)	PNX92765.1(ribonuclease H [Trifolium pratense])		PF13456.3(RVT_3:Reverse transcriptase-like)
Glyur004001s00045914	7.31945	1.7e-09	8.66e-08	yes	up	0.02	2.46	0	0.06	0	1.81	1.75	3.82	Glyur004001s00045914					ENOG410ZT99(S:Function unknown); ENOG4111T8J(S:Function unknown)	XP_020221020.1(zinc finger BED domain-containing protein RICESLEEPER 2-like [Cajanus cajan])	sp|B9FJG3|RSLE1_ORYSJ(Zinc finger BED domain-containing protein RICESLEEPER 1 OS=Oryza sativa subsp. japonica OX=39947 GN=Os05g0239150 PE=3 SV=1)	PF05699.11(Dimer_Tnp_hAT:hAT family C-terminal dimerisation region); PF14372.3(DUF4413:Domain of unknown function (DUF4413)); PF02892.12(zf-BED:BED zinc finger)
Glyur000327s00026459	1.72159	1.72e-09	8.72e-08	yes	up	52.1733	126.693	52.94	33.66	69.92	133.6	123.46	123.02	Glyur000327s00026459	GO:0016310(biological_process:phosphorylation); GO:0004001(molecular_function:adenosine kinase activity); GO:0006167(biological_process:AMP biosynthetic process); GO:0006166(biological_process:purine ribonucleoside salvage)	K00856	E2.7.1.20, ADK	map00230(Purine metabolism)	COG0524(S:Function unknown)	AFK38570.1(unknown [Lotus japonicus])	sp|Q9LZG0|ADK2_ARATH(Adenosine kinase 2 OS=Arabidopsis thaliana OX=3702 GN=ADK2 PE=1 SV=1)	PF00294.21(PfkB:pfkB family carbohydrate kinase)
Glyur000015s00000787	-2.12348	1.73e-09	8.79e-08	yes	down	17.31	2.91	26.47	11.06	14.4	2.61	3.62	2.5	Glyur000015s00000787		K12130	PRR5	map04712(Circadian rhythm - plant)	COG5641(K:Transcription); COG2204(K:Transcription)	XP_017422852.1(PREDICTED: two-component response regulator-like APRR5 isoform X2 [Vigna angularis])	sp|Q689G6|PRR95_ORYSJ(Two-component response regulator-like PRR95 OS=Oryza sativa subsp. japonica OX=39947 GN=PRR95 PE=2 SV=1)	PF06203.11(CCT:CCT motif)
Glyur000053s00006444	3.43183	1.75e-09	8.83e-08	yes	up	1.36667	11.09	1.03	1.93	1.14	15.57	9.6	8.1	Glyur000053s00006444					ENOG4111623(S:Function unknown); ENOG410YU8R(S:Function unknown)	XP_014512976.1(peamaclein [Vigna radiata var. radiata])	sp|Q948Z4|SNAK1_SOLTU(Snakin-1 OS=Solanum tuberosum OX=4113 GN=SN1 PE=1 SV=1)	PF02704.11(GASA:Gibberellin regulated protein)
Glyur000208s00014289	-1.2675	1.75e-09	8.83e-08	yes	down	133.887	52.22	153.43	126.72	121.51	38.32	67.4	50.94	Glyur000208s00014289					ENOG4111VJ1(S:Function unknown)	XP_003543228.1(PREDICTED: protein yippee-like At5g53940 [Glycine max])	sp|Q9FN32|YIPL7_ARATH(Protein yippee-like At5g53940 OS=Arabidopsis thaliana OX=3702 GN=At5g53940 PE=2 SV=1)	PF03226.11(Yippee-Mis18:Yippee zinc-binding/DNA-binding /Mis18, centromere assembly)
Glyur000183s00013050	3.53501	1.83e-09	9.22e-08	yes	up	9.28333	82.1733	4.45	13.15	10.25	126.35	80.79	39.38	Glyur000183s00013050	GO:0050660(molecular_function:flavin adenine dinucleotide binding); GO:0016614(molecular_function:oxidoreductase activity, acting on CH-OH group of donors); GO:0055114(biological_process:oxidation-reduction process)				COG0277(C:Energy production and conversion); ENOG4110F4M(S:Function unknown)	XP_013457301.1(berberine bridge enzyme-like 13 [Medicago truncatula])	sp|Q93ZA3|BBE13_ARATH(Berberine bridge enzyme-like 13 OS=Arabidopsis thaliana OX=3702 GN=At1g30760 PE=1 SV=1)	PF01565.20(FAD_binding_4:FAD binding domain); PF08031.9(BBE:Berberine and berberine like)
Glyur002399s00033214	3.03521	1.85e-09	9.31e-08	yes	up	13.64	86.8967	5.93	20.17	14.82	99.2	82.12	79.37	Glyur002399s00033214	GO:0005544(molecular_function:calcium-dependent phospholipid binding); GO:0005509(molecular_function:calcium ion binding)				ENOG410XPUN(S:Function unknown)	AFK33579.1(unknown [Lotus japonicus])	sp|Q9LX07|ANXD7_ARATH(Annexin D7 OS=Arabidopsis thaliana OX=3702 GN=ANNAT7 PE=2 SV=1)	PF00191.17(Annexin:Annexin)
Glyur001446s00035040	1.70016	1.86e-09	9.35e-08	yes	up	82.36	196.983	80.97	91.8	74.31	163.26	178.86	248.83	Glyur001446s00035040	GO:0004497(molecular_function:monooxygenase activity); GO:0020037(molecular_function:heme binding); GO:0016705(molecular_function:oxidoreductase activity, acting on paired donors, with incorporation or reduction of molecular oxygen); GO:0016710(molecular_function:trans-cinnamate 4-monooxygenase activity); GO:0005506(molecular_function:iron ion binding); GO:0055114(biological_process:oxidation-red…	K00487	CYP73A	map00945(Stilbenoid, diarylheptanoid and gingerol biosynthesis); map00130(Ubiquinone and other terpenoid-quinone biosynthesis); map00940(Phenylpropanoid biosynthesis); map00941(Flavonoid biosynthesis); map00360(Phenylalanine metabolism)	COG2124(Q:Secondary metabolites biosynthesis, transport and catabolism)	Q96423.1(RecName: Full=Trans-cinnamate 4-monooxygenase; AltName: Full=Cinnamic acid 4-hydroxylase; Short=C4H; Short=CA4H; AltName: Full=Cytochrome P450 73; AltName: Full=Cytochrome P450C4H)	sp|Q96423|TCMO_GLYEC(Trans-cinnamate 4-monooxygenase OS=Glycyrrhiza echinata OX=46348 GN=CYP73A14 PE=2 SV=1)	PF00067.19(p450:Cytochrome P450)
Glyur000313s00016920	2.05472	1.88e-09	9.39e-08	yes	up	14.19	45.2567	10.39	17.77	14.41	48.91	42.41	44.45	Glyur000313s00016920	GO:0009058(biological_process:biosynthetic process); GO:0016779(molecular_function:nucleotidyltransferase activity)	K00966	GMPP	map00520(Amino sugar and nucleotide sugar metabolism); map00051(Fructose and mannose metabolism)	COG1208(B:Chromatin structure and dynamics)	XP_020208666.1(mannose-1-phosphate guanylyltransferase 1-like [Cajanus cajan])	sp|O22287|GMPP1_ARATH(Mannose-1-phosphate guanylyltransferase 1 OS=Arabidopsis thaliana OX=3702 GN=CYT1 PE=1 SV=1)	PF00483.20(NTP_transferase:Nucleotidyl transferase); PF00132.21(Hexapep:Bacterial transferase hexapeptide (six repeats)); PF12804.4(NTP_transf_3:MobA-like NTP transferase domain)
Glyur000010s00000980	-1.16419	1.89e-09	9.42e-08	yes	down	2288.17	774.443	2608.45	2196.24	2059.81	597.99	826.78	898.56	Glyur000010s00000980	GO:0003723(molecular_function:RNA binding)	K20102	YTHDF		ENOG410YABQ(S:Function unknown)	KOM30796.1(hypothetical protein LR48_Vigan01g035100 [Vigna angularis])	sp|P59326|YTHD1_MOUSE(YTH domain-containing family protein 1 OS=Mus musculus OX=10090 GN=Ythdf1 PE=1 SV=1)	PF04146.12(YTH:YT521-B-like domain)
Glyur000118s00009675	3.08969	1.94e-09	9.64e-08	yes	up	0.43	2.77667	0.46	0.49	0.34	2.55	2.36	3.42	Glyur000118s00009675	GO:0016020(cellular_component:membrane)	K17338	REEP1_2_3_4		COG5052(S:Function unknown)	XP_003550422.1(PREDICTED: HVA22-like protein i [Glycine max])	sp|Q8LE10|HA22I_ARATH(HVA22-like protein i OS=Arabidopsis thaliana OX=3702 GN=HVA22I PE=2 SV=2)	PF03134.16(TB2_DP1_HVA22:TB2/DP1, HVA22 family)
Glyur000086s00011536	2.74269	1.95e-09	9.67e-08	yes	up	5.73333	29.67	2.83	7.38	6.99	28.4	28.07	32.54	Glyur000086s00011536					ENOG4111564(K:Transcription)	XP_019425157.1(PREDICTED: dof zinc finger protein DOF1.5-like isoform X2 [Lupinus angustifolius])	sp|P68350|DOF15_ARATH(Dof zinc finger protein DOF1.5 OS=Arabidopsis thaliana OX=3702 GN=DOF1.5 PE=1 SV=1)	PF02701.12(zf-Dof:Dof domain, zinc finger)
Glyur001627s00031864	8.13243	1.95e-09	9.67e-08	yes	up	0	7.13667	0	0	0	7.61	7	6.8	Glyur001627s00031864					ENOG4112CJ0(S:Function unknown)	BAF98232.1(CM0545.540.nc [Lotus japonicus])		PF05899.9(Cupin_3:Protein of unknown function (DUF861))
Glyur001952s00038092	3.40479	1.98e-09	9.8e-08	yes	up	2.40333	20.15	2.17	4.16	0.88	18.39	23.38	18.68	Glyur001952s00038092	GO:0016787(molecular_function:hydrolase activity); GO:0008152(biological_process:metabolic process)	K14664	ILR1		COG1473(S:Function unknown)	XP_020202287.1(IAA-amino acid hydrolase ILR1-like 4 [Cajanus cajan])	sp|Q8S9S4|ILL1_ORYSJ(IAA-amino acid hydrolase ILR1-like 1 OS=Oryza sativa subsp. japonica OX=39947 GN=ILL1 PE=2 SV=1)	PF01546.25(Peptidase_M20:Peptidase family M20/M25/M40); PF07687.11(M20_dimer:Peptidase dimerisation domain)
Glyur000366s00019231	1.21867	2.06e-09	1.01e-07	yes	up	162.187	282.45	159.73	149.24	177.59	302.17	278.24	266.94	Glyur000366s00019231	GO:0004013(molecular_function:adenosylhomocysteinase activity); GO:0033353(biological_process:S-adenosylmethionine cycle); GO:0005829(cellular_component:cytosol); GO:0006730(biological_process:one-carbon metabolic process)	K01251	E3.3.1.1, ahcY	map00270(Cysteine and methionine metabolism)	COG0499(H:Coenzyme transport and metabolism)	XP_016187706.1(adenosylhomocysteinase [Arachis ipaensis])	sp|O23255|SAHH1_ARATH(Adenosylhomocysteinase 1 OS=Arabidopsis thaliana OX=3702 GN=SAHH1 PE=1 SV=1)	PF05221.14(AdoHcyase:S-adenosyl-L-homocysteine hydrolase); PF00670.18(AdoHcyase_NAD:S-adenosyl-L-homocysteine hydrolase, NAD binding domain); PF02826.16(2-Hacid_dh_C:D-isomer specific 2-hydroxyacid dehydrogenase, NAD binding domain); PF07991.9(IlvN:Acetohydroxy acid isomeroreductase, NADPH-binding domain); PF02254.15(TrkA_N:TrkA-N domain)
Glyur000029s00003593	-1.74447	2.09e-09	1.03e-07	yes	down	13.06	2.89333	17.72	8.2	13.26	2.43	3.81	2.44	Glyur000029s00003593		K14861	URB1		ENOG410XR9W(J:Translation, ribosomal structure and biogenesis); ENOG41100JM(S:Function unknown)	XP_004500064.1(PREDICTED: uncharacterized protein LOC101510812 [Cicer arietinum])	sp|Q571H0|NPA1P_MOUSE(Nucleolar pre-ribosomal-associated protein 1 OS=Mus musculus OX=10090 GN=Urb1 PE=1 SV=2)	PF11707.5(Npa1:Ribosome 60S biogenesis N-terminal); PF16201.2(NopRA1:Nucleolar pre-ribosomal-associated protein 1)
Glyur000052s00005761	4.15545	2.17e-09	1.06e-07	yes	up	0.143333	1.84	0.19	0.17	0.07	2.15	1.38	1.99	Glyur000052s00005761	GO:0005618(cellular_component:cell wall); GO:0030145(molecular_function:manganese ion binding); GO:0033609(biological_process:oxalate metabolic process); GO:0005576(cellular_component:extracellular region); GO:0045735(molecular_function:nutrient reservoir activity); GO:0046564(molecular_function:oxalate decarboxylase activity)				ENOG41105Y5(S:Function unknown); ENOG410YB6M(S:Function unknown)	XP_004510470.1(PREDICTED: uncharacterized protein LOC101508818 [Cicer arietinum])	sp|P94040|GL31_ARATH(Germin-like protein subfamily 3 member 1 OS=Arabidopsis thaliana OX=3702 GN=GLP1 PE=1 SV=1)	PF00190.19(Cupin_1:Cupin); PF07883.8(Cupin_2:Cupin domain)
Glyur000015s00000802	-1.29936	2.17e-09	1.06e-07	yes	down	586.063	175.933	759.23	406.49	592.47	153.29	211.33	163.18	Glyur000015s00000802	GO:0003676(molecular_function:nucleic acid binding); GO:0000166(molecular_function:nucleotide binding)	K12890	SFRS1, ASF, SF2	map04657(IL-17 signaling pathway); map05168(Herpes simplex infection); map03040(Spliceosome)	COG0724(S:Function unknown)	XP_015878718.1(PREDICTED: serine/arginine-rich splicing factor SR34A isoform X2 [Ziziphus jujuba])	sp|Q9XFR5|SR30_ARATH(Serine/arginine-rich splicing factor SR30 OS=Arabidopsis thaliana OX=3702 GN=SR30 PE=1 SV=1)	PF00076.19(RRM_1:RNA recognition motif. (a.k.a. RRM, RBD, or RNP domain)); PF16842.2(RRM_occluded:Occluded RNA-recognition motif)
Glyur000156s00011996	3.71887	2.22e-09	1.08e-07	yes	up	0.406667	3.60667	0.55	0.12	0.55	3.75	3.32	3.75	Glyur000156s00011996					ENOG410YK0V(S:Function unknown)	XP_003554497.2(PREDICTED: protein NETWORKED 3A-like isoform X1 [Glycine max])	sp|Q66GR8|NET3A_ARATH(Protein NETWORKED 3A OS=Arabidopsis thaliana OX=3702 GN=NET3A PE=2 SV=1)	PF07765.9(KIP1:KIP1-like protein)
Glyur000106s00011706	-1.20863	2.3e-09	1.12e-07	yes	down	62.7233	20.71	59.5	64.84	63.83	18.1	23.25	20.78	Glyur000106s00011706	GO:0003333(biological_process:amino acid transmembrane transport); GO:0016020(cellular_component:membrane); GO:0015171(molecular_function:amino acid transmembrane transporter activity)	K15015	SLC32A, VGAT	map04727(GABAergic synapse); map04723(Retrograde endocannabinoid signaling); map04721(Synaptic vesicle cycle); map05032(Morphine addiction); map05033(Nicotine addiction)	COG0814(E:Amino acid transport and metabolism)	AES62112.2(transmembrane amino acid transporter family protein [Medicago truncatula])	sp|F4IUW3|AVT1C_ARATH(Amino acid transporter AVT1C OS=Arabidopsis thaliana OX=3702 GN=AVT1C PE=1 SV=1)	PF01490.15(Aa_trans:Transmembrane amino acid transporter protein)
Glyur000049s00003162	1.16118	2.31e-09	1.12e-07	yes	up	54.4967	89.4133	62.4	48.37	52.72	82.89	85.56	99.79	Glyur000049s00003162	GO:0016021(cellular_component:integral component of membrane); GO:0005746(cellular_component:mitochondrial respiratory chain)				ENOG410YTGP(O:Posttranslational modification, protein turnover, chaperones)	XP_003625971.2(cytochrome c oxidase subunit 5C isoform X1 [Medicago truncatula])	sp|Q9SXX7|COX5C_ORYSJ(Cytochrome c oxidase subunit 5C OS=Oryza sativa subsp. japonica OX=39947 GN=COX5C PE=3 SV=3)
Glyur000094s00007853	2.28274	2.32e-09	1.13e-07	yes	up	1.14	4.11333	1.68	0.92	0.82	3.43	4.09	4.82	Glyur000094s00007853	GO:0005355(molecular_function:glucose transmembrane transporter activity); GO:0022891(molecular_function:substrate-specific transmembrane transporter activity); GO:0015992(biological_process:proton transport); GO:0016021(cellular_component:integral component of membrane); GO:0046323(biological_process:glucose import); GO:1904659(biological_process:glucose transmembrane transport); GO:0005887(cell…				ENOG410XNQK(S:Function unknown)	XP_020216427.1(sugar transport protein 13 [Cajanus cajan])	sp|Q94AZ2|STP13_ARATH(Sugar transport protein 13 OS=Arabidopsis thaliana OX=3702 GN=STP13 PE=1 SV=2)	PF00083.21(Sugar_tr:Sugar (and other) transporter); PF07690.13(MFS_1:Major Facilitator Superfamily)
Glyur000001s00000103	3.47245	2.33e-09	1.13e-07	yes	up	0.266667	2.35	0.1	0.33	0.37	1.77	2.35	2.93	Glyur000001s00000103	GO:0033947(molecular_function:mannosylglycoprotein endo-beta-mannosidase activity); GO:0005975(biological_process:carbohydrate metabolic process); GO:0043231(cellular_component:intracellular membrane-bounded organelle)	K18577	EBM		COG3250(G:Carbohydrate transport and metabolism)	GAU42803.1(hypothetical protein TSUD_34470 [Trifolium subterraneum])	sp|Q5H7P5|EBM_LILLO(Mannosylglycoprotein endo-beta-mannosidase OS=Lilium longiflorum OX=4690 GN=EBM PE=1 SV=4)	PF00703.18(Glyco_hydro_2:Glycosyl hydrolases family 2); PF02836.14(Glyco_hydro_2_C:Glycosyl hydrolases family 2, TIM barrel domain)
Glyur000734s00026332	-2.55005	2.39e-09	1.15e-07	yes	down	17.91	2.26333	28.22	12.51	13	1.48	2.6	2.71	Glyur000734s00026332
Glyur000024s00006629	1.60876	2.48e-09	1.2e-07	yes	up	6.96667	15.98	7.52	5.83	7.55	12.06	15.95	19.93	Glyur000024s00006629	GO:0005524(molecular_function:ATP binding)	K10355	ACTF		COG5277(Z:Cytoskeleton)	ACK87035.1(actin [Caragana korshinskii])	sp|O81221|ACT_GOSHI(Actin OS=Gossypium hirsutum OX=3635 PE=3 SV=1)	PF00022.16(Actin:Actin)
Glyur000163s00011098	4.59647	2.52e-09	1.21e-07	yes	up	0.33	6.46333	0.04	0.66	0.29	5.44	5.34	8.61	Glyur000163s00011098	GO:0042546(biological_process:cell wall biogenesis); GO:0005618(cellular_component:cell wall); GO:0048046(cellular_component:apoplast); GO:0071555(biological_process:cell wall organization); GO:0016762(molecular_function:xyloglucan:xyloglucosyl transferase activity); GO:0004553(molecular_function:hydrolase activity, hydrolyzing O-glycosyl compounds); GO:0010411(biological_process:xyloglucan metab…	K08235	E2.4.1.207		ENOG410YDGS(G:Carbohydrate transport and metabolism)	KHN09532.1(Putative xyloglucan endotransglucosylase/hydrolase protein 32 [Glycine soja])	sp|Q9SJL9|XTH32_ARATH(Probable xyloglucan endotransglucosylase/hydrolase protein 32 OS=Arabidopsis thaliana OX=3702 GN=XTH32 PE=2 SV=1)	PF00722.18(Glyco_hydro_16:Glycosyl hydrolases family 16); PF06955.9(XET_C:Xyloglucan endo-transglycosylase (XET) C-terminus)
Glyur000150s00014601	2.61087	2.62e-09	1.26e-07	yes	up	1.14333	5.32333	1.04	1.43	0.96	4.78	4.37	6.82	Glyur000150s00014601	GO:0016021(cellular_component:integral component of membrane); GO:0006810(biological_process:transport)				ENOG410XRSQ(S:Function unknown)	XP_014492454.1(patellin-6 [Vigna radiata var. radiata])	sp|Q9SCU1|PATL6_ARATH(Patellin-6 OS=Arabidopsis thaliana OX=3702 GN=PATL6 PE=2 SV=1)	PF00650.17(CRAL_TRIO:CRAL/TRIO domain); PF03765.12(CRAL_TRIO_N:CRAL/TRIO, N-terminal domain)
Glyur000167s00012280	3.12031	2.63e-09	1.26e-07	yes	up	0.92	5.94667	0.87	0.77	1.12	5.49	4.33	8.02	Glyur000167s00012280	GO:0005971(cellular_component:ribonucleoside-diphosphate reductase complex); GO:0009186(biological_process:deoxyribonucleoside diphosphate metabolic process); GO:0004748(molecular_function:ribonucleoside-diphosphate reductase activity, thioredoxin disulfide as acceptor); GO:0009263(biological_process:deoxyribonucleotide biosynthetic process); GO:0055114(biological_process:oxidation-reduction proc…	K10808	RRM2	map00240(Pyrimidine metabolism); map00480(Glutathione metabolism); map00983(Drug metabolism - other enzymes); map00230(Purine metabolism); map04115(p53 signaling pathway)	COG0208(F:Nucleotide transport and metabolism)	XP_007162902.1(hypothetical protein PHAVU_001G190100g [Phaseolus vulgaris])	sp|P49730|RIR2_TOBAC(Ribonucleoside-diphosphate reductase small chain OS=Nicotiana tabacum OX=4097 PE=2 SV=1)	PF00268.18(Ribonuc_red_sm:Ribonucleotide reductase, small chain)
Glyur001041s00027456	2.38854	2.66e-09	1.27e-07	yes	up	2.31667	9.36667	1.69	3.13	2.13	10.21	9.71	8.18	Glyur001041s00027456					COG2132(O:Posttranslational modification, protein turnover, chaperones)	XP_022876071.1(L-ascorbate oxidase homolog [Olea europaea var. sylvestris])	sp|Q00624|ASOL_BRANA(L-ascorbate oxidase homolog OS=Brassica napus OX=3708 GN=Bp10 PE=2 SV=1)	PF00394.19(Cu-oxidase:Multicopper oxidase); PF07732.12(Cu-oxidase_3:Multicopper oxidase); PF07731.11(Cu-oxidase_2:Multicopper oxidase)
Glyur000040s00007338	-1.20724	2.78e-09	1.32e-07	yes	down	184.597	60.75	198.28	155.11	200.4	43.38	73.52	65.35	Glyur000040s00007338					COG5260(L:Replication, recombination and repair)	XP_014522958.1(UTP:RNA uridylyltransferase 1 [Vigna radiata var. radiata])	sp|O64642|URT1_ARATH(UTP:RNA uridylyltransferase 1 OS=Arabidopsis thaliana OX=3702 GN=URT1 PE=1 SV=2)	PF03828.16(PAP_assoc:Cid1 family poly A polymerase)
Glyur000046s00004843	1.67342	3e-09	1.43e-07	yes	up	9.08667	21.02	9.09	8.12	10.05	20.61	19.04	23.41	Glyur000046s00004843	GO:0015031(biological_process:protein transport); GO:0016021(cellular_component:integral component of membrane)	K19995	SCAMP		ENOG410XSJN(U:Intracellular trafficking, secretion, and vesicular transport)	XP_015956292.1(secretory carrier-associated membrane protein [Arachis duranensis])	sp|Q9ZTX0|SCAM_PEA(Secretory carrier-associated membrane protein OS=Pisum sativum OX=3888 GN=PSAM2 PE=2 SV=1)	PF04144.10(SCAMP:SCAMP family)
Glyur000199s00018227	-1.83079	3.14e-09	1.49e-07	yes	down	195.267	40.54	273.24	115.38	197.18	28.15	44.27	49.2	Glyur000199s00018227		K03875	SKP2, FBXL1	map04110(Cell cycle); map05203(Viral carcinogenesis); map05200(Pathways in cancer); map05168(Herpes simplex infection); map05169(Epstein-Barr virus infection); map04068(FoxO signaling pathway); map04120(Ubiquitin mediated proteolysis); map04150(mTOR signaling pathway); map05222(Small cell lung cancer)	ENOG41103D0(O:Posttranslational modification, protein turnover, chaperones); ENOG410XQ54(O:Posttranslational modification, protein turnover, chaperones)	XP_020236139.1(F-box protein SKP2A-like [Cajanus cajan])	sp|Q9LPL4|SKP2A_ARATH(F-box protein SKP2A OS=Arabidopsis thaliana OX=3702 GN=SKP2A PE=1 SV=1)	PF13516.3(LRR_6:Leucine Rich repeat); PF12937.4(F-box-like:F-box-like); PF00646.30(F-box:F-box domain)
Glyur006062s00044202	-3.67356	3.32e-09	1.57e-07	yes	down	9.11333	0.573333	14.18	6.6	6.56	0.13	0.91	0.68	Glyur006062s00044202					ENOG410YNY7(K:Transcription); ENOG410YDYN(K:Transcription); ENOG410YAU7(K:Transcription); ENOG41108V5(K:Transcription)	KEH29303.1(transcription factor [Medicago truncatula])	sp|Q9C8P8|BH080_ARATH(Transcription factor bHLH80 OS=Arabidopsis thaliana OX=3702 GN=BHLH80 PE=2 SV=1)	PF00010.23(HLH:Helix-loop-helix DNA-binding domain)
Glyur000161s00011252	3.59386	3.5e-09	1.65e-07	yes	up	0.89	7.92	0.62	0.44	1.61	8.21	7.43	8.12	Glyur000161s00011252					ENOG410YZR5(S:Function unknown)	KEH37161.1(cAMP-regulated phosphoprotein-like protein [Medicago truncatula])		PF04667.14(Endosulfine:cAMP-regulated phosphoprotein/endosulfine conserved region)
Glyur001218s00032872	5.29858	3.5e-09	1.65e-07	yes	up	0.246667	7.33	0.16	0.43	0.15	9.15	7.94	4.9	Glyur001218s00032872	GO:0016740(molecular_function:transferase activity)	K00799	GST, gst	map00480(Glutathione metabolism); map05204(Chemical carcinogenesis); map00983(Drug metabolism - other enzymes); map00982(Drug metabolism - cytochrome P450); map00980(Metabolism of xenobiotics by cytochrome P450); map05200(Pathways in cancer); map05418(Fluid shear stress and atherosclerosis); map05225(Hepatocellular carcinoma); map01524(Platinum drug resistance)	ENOG410XSIX(O:Posttranslational modification, protein turnover, chaperones)	PNX75169.1(glutathione S-transferase [Trifolium pratense])	sp|Q03666|GSTX4_TOBAC(Probable glutathione S-transferase OS=Nicotiana tabacum OX=4097 PE=2 SV=1)	PF02798.17(GST_N:Glutathione S-transferase, N-terminal domain); PF13417.3(GST_N_3:Glutathione S-transferase, N-terminal domain); PF13410.3(GST_C_2:Glutathione S-transferase, C-terminal domain); PF00043.22(GST_C:Glutathione S-transferase, C-terminal domain); PF13409.3(GST_N_2:Glutathione S-transferase, N-terminal domain); PF14497.3(GST_C_3:Glutathione S-transferase, C-terminal domain)
Glyur000004s00000404	2.01263	3.59e-09	1.69e-07	yes	up	3.46333	10.1367	4.92	2.11	3.36	11.32	10.07	9.02	Glyur000004s00000404	GO:0005643(cellular_component:nuclear pore); GO:0006810(biological_process:transport); GO:0005975(biological_process:carbohydrate metabolic process); GO:0004553(molecular_function:hydrolase activity, hydrolyzing O-glycosyl compounds)	K01188	E3.2.1.21	map00460(Cyanoamino acid metabolism); map00500(Starch and sucrose metabolism); map00940(Phenylpropanoid biosynthesis)	COG2723(G:Carbohydrate transport and metabolism)	KYP58456.1(Non-cyanogenic beta-glucosidase, partial [Cajanus cajan])	sp|Q7XKV4|BGL12_ORYSJ(Beta-glucosidase 12 OS=Oryza sativa subsp. japonica OX=39947 GN=BGLU12 PE=1 SV=2)	PF00232.15(Glyco_hydro_1:Glycosyl hydrolase family 1)
Glyur001033s00031538	-1.24833	3.7e-09	1.74e-07	yes	down	28.8667	9.59333	30.07	29.06	27.47	7.25	11.79	9.74	Glyur001033s00031538	GO:0004252(molecular_function:serine-type endopeptidase activity); GO:0006508(biological_process:proteolysis)	K01303	APEH		COG1506(E:Amino acid transport and metabolism)	XP_003613901.1(acylamino-acid-releasing enzyme isoform X2 [Medicago truncatula])	sp|Q84LM4|AARE_ARATH(Acylamino-acid-releasing enzyme OS=Arabidopsis thaliana OX=3702 GN=AARE PE=1 SV=1)	PF00326.18(Peptidase_S9:Prolyl oligopeptidase family); PF00561.17(Abhydrolase_1:alpha/beta hydrolase fold); PF12146.5(Hydrolase_4:Serine aminopeptidase, S33); PF00135.25(COesterase:Carboxylesterase family); PF01738.15(DLH:Dienelactone hydrolase family); PF07859.10(Abhydrolase_3:alpha/beta hydrolase fold); PF12697.4(Abhydrolase_6:Alpha/beta hydrolase family)
Glyur000068s00006807	3.04786	3.76e-09	1.76e-07	yes	up	2.07333	13.24	1.63	2.65	1.94	8.33	10.87	20.52	Glyur000068s00006807	GO:0003677(molecular_function:DNA binding)				ENOG410YSK7(K:Transcription); ENOG410YUWZ(K:Transcription); COG0023(K:Transcription)	XP_017432782.1(PREDICTED: MYB-like transcription factor ETC3 [Vigna angularis])	sp|Q9LNI5|ETC1_ARATH(MYB-like transcription factor ETC1 OS=Arabidopsis thaliana OX=3702 GN=ETC1 PE=2 SV=1)	PF00249.28(Myb_DNA-binding:Myb-like DNA-binding domain); PF13921.3(Myb_DNA-bind_6:Myb-like DNA-binding domain)
Glyur000667s00025245	-2.59444	3.88e-09	1.81e-07	yes	down	66.5967	8.36333	82.63	53.63	63.53	2.98	11.08	11.03	Glyur000667s00025245					ENOG410YMY7(S:Function unknown); ENOG41113T2(S:Function unknown); ENOG41105QR(S:Function unknown); ENOG410YR03(S:Function unknown)	XP_022634270.1(uncharacterized protein LOC106754869 isoform X1 [Vigna radiata var. radiata])		PF14009.3(DUF4228:Domain of unknown function (DUF4228))
Glyur001066s00037421	-2.02465	4.08e-09	1.9e-07	yes	down	74.4033	13.46	110.35	37.96	74.9	9.84	16.34	14.2	Glyur001066s00037421	GO:0003677(molecular_function:DNA binding)				ENOG410YYXY(K:Transcription)	KYP50557.1(hypothetical protein KK1_027613 [Cajanus cajan])	sp|Q39117|TGT2_ARATH(Trihelix transcription factor GT-2 OS=Arabidopsis thaliana OX=3702 GN=GT-2 PE=2 SV=1)	PF13837.3(Myb_DNA-bind_4:Myb/SANT-like DNA-binding domain); PF10545.6(MADF_DNA_bdg:Alcohol dehydrogenase transcription factor Myb/SANT-like); PF13921.3(Myb_DNA-bind_6:Myb-like DNA-binding domain); PF00249.28(Myb_DNA-binding:Myb-like DNA-binding domain)
Glyur000518s00035538	2.63701	4.19e-09	1.95e-07	yes	up	2.10333	9.75333	2.7	2.32	1.29	8.47	8.65	12.14	Glyur000518s00035538					ENOG410YHFG(S:Function unknown)	NP_001340933.1(LBD domain-containing transcription factor [Glycine max])	sp|Q9SHE9|LBD4_ARATH(LOB domain-containing protein 4 OS=Arabidopsis thaliana OX=3702 GN=LBD4 PE=1 SV=1)	PF03195.11(DUF260:Protein of unknown function DUF260)
Glyur003284s00042901	3.43258	4.22e-09	1.96e-07	yes	up	22.4833	178.13	11.94	38.37	17.14	258.97	188.79	86.63	Glyur003284s00042901	GO:0004497(molecular_function:monooxygenase activity); GO:0016020(cellular_component:membrane); GO:0020037(molecular_function:heme binding); GO:0016021(cellular_component:integral component of membrane); GO:0016705(molecular_function:oxidoreductase activity, acting on paired donors, with incorporation or reduction of molecular oxygen); GO:0005506(molecular_function:iron ion binding); GO:0046872(m…	K20562	CYP736A		COG2124(B:Chromatin structure and dynamics)	XP_003615678.1(cytochrome P450 CYP736A12 [Medicago truncatula])	sp|H2DH18|C7A12_PANGI(Cytochrome P450 CYP736A12 OS=Panax ginseng OX=4054 PE=2 SV=1)	PF00067.19(p450:Cytochrome P450)
Glyur000357s00018133	5.09897	4.5e-09	2.08e-07	yes	up	0.176667	5.32	0	0.39	0.14	6.24	4.56	5.16	Glyur000357s00018133	GO:0005622(cellular_component:intracellular); GO:0007264(biological_process:small GTPase mediated signal transduction); GO:0005525(molecular_function:GTP binding)	K04392	RAC1	map05167(Kaposi sarcoma-associated herpesvirus infection); map04650(Natural killer cell mediated cytotoxicity); map05210(Colorectal cancer); map05163(Human cytomegalovirus infection); map05212(Pancreatic cancer); map04015(Rap1 signaling pathway); map04014(Ras signaling pathway); map04010(MAPK signaling pathway); map04013(MAPK signaling pathway - fly); map05169(Epstein-Barr virus infection); map04…	COG1100(T:Signal transduction mechanisms)	XP_020218150.1(rac-like GTP-binding protein ARAC7 isoform X2 [Cajanus cajan])	sp|O82480|RAC7_ARATH(Rac-like GTP-binding protein ARAC7 OS=Arabidopsis thaliana OX=3702 GN=ARAC7 PE=1 SV=1)	PF00071.19(Ras:Ras family); PF08477.10(Roc:Ras of Complex, Roc, domain of DAPkinase); PF00025.18(Arf:ADP-ribosylation factor family)
Glyur000359s00016719	-1.14486	4.53e-09	2.09e-07	yes	down	23.18	6.71333	28.34	18	23.2	5.97	7.53	6.64	Glyur000359s00016719	GO:0006355(biological_process:regulation of transcription, DNA-templated); GO:0005634(cellular_component:nucleus); GO:0006351(biological_process:transcription, DNA-templated); GO:0003677(molecular_function:DNA binding)				ENOG410XXJ3(K:Transcription)	XP_020236855.1(transcription factor PCL1-like [Cajanus cajan])	sp|Q9SNB4|PCL1_ARATH(Transcription factor LUX OS=Arabidopsis thaliana OX=3702 GN=LUX PE=1 SV=1)	PF00249.28(Myb_DNA-binding:Myb-like DNA-binding domain)
Glyur000391s00016081	-4.0188	4.69e-09	2.16e-07	yes	down	21.0233	1.01333	12.51	18.36	32.2	0.38	1.71	0.95	Glyur000391s00016081
Glyur000692s00016543	1.62946	4.72e-09	2.17e-07	yes	up	19.7467	46.3567	16.6	19.67	22.97	42.14	40.78	56.15	Glyur000692s00016543		K01426	E3.5.1.4, amiE	map00627(Aminobenzoate degradation); map00360(Phenylalanine metabolism); map00330(Arginine and proline metabolism); map00380(Tryptophan metabolism); map00643(Styrene degradation)	COG0154(J:Translation, ribosomal structure and biogenesis)	XP_004504390.1(PREDICTED: putative amidase C869.01 [Cicer arietinum])	sp|A0A1P8B760|AMI4G_ARATH(Probable amidase At4g34880 OS=Arabidopsis thaliana OX=3702 GN=At4g34880 PE=2 SV=1)	PF01425.18(Amidase:Amidase)
Glyur001395s00031215	2.56293	4.8e-09	2.2e-07	yes	up	1.27667	5.49333	1.56	1.42	0.85	7.44	5.62	3.42	Glyur001395s00031215	GO:0003700(molecular_function:transcription factor activity, sequence-specific DNA binding); GO:0006355(biological_process:regulation of transcription, DNA-templated); GO:0007049(biological_process:cell cycle); GO:0003677(molecular_function:DNA binding)	K09422	MYBP		COG5147(S:Function unknown)	XP_020218313.1(transcription factor MYB124 isoform X1 [Cajanus cajan])	sp|F4IRB4|MYB88_ARATH(Transcription factor MYB88 OS=Arabidopsis thaliana OX=3702 GN=MYB88 PE=1 SV=1)	PF00249.28(Myb_DNA-binding:Myb-like DNA-binding domain); PF13921.3(Myb_DNA-bind_6:Myb-like DNA-binding domain)
Glyur000234s00015066	2.06308	4.83e-09	2.2e-07	yes	up	3.98333	12.5167	3.71	3.46	4.78	11.41	12.95	13.19	Glyur000234s00015066	GO:0016853(molecular_function:isomerase activity); GO:0009987(biological_process:cellular process); GO:0005789(cellular_component:endoplasmic reticulum membrane); GO:0005528(molecular_function:FK506 binding); GO:0003755(molecular_function:peptidyl-prolyl cis-trans isomerase activity); GO:0061077(biological_process:chaperone-mediated protein folding)	K01802	E5.2.1.8		COG0545(S:Function unknown)	KEH31436.1(FKBP-type peptidyl-prolyl cis-trans isomerase [Medicago truncatula])	sp|Q9SCY2|FKB13_ARATH(Peptidyl-prolyl cis-trans isomerase FKBP13, chloroplastic OS=Arabidopsis thaliana OX=3702 GN=FKBP13 PE=1 SV=2)	PF00254.25(FKBP_C:FKBP-type peptidyl-prolyl cis-trans isomerase)
Glyur000021s00002746	5.01678	4.82e-09	2.2e-07	yes	up	0.396667	9.58	0	0.26	0.93	11.5	7.65	9.59	Glyur000021s00002746	GO:0016020(cellular_component:membrane)				ENOG410YGGV(T:Signal transduction mechanisms); ENOG410YFY3(S:Function unknown); ENOG4111AV0(S:Function unknown)	XP_013444327.1(NDR1/HIN1-like protein 2 [Medicago truncatula])		PF03168.10(LEA_2:Late embryogenesis abundant protein)
Glyur000608s00025880	3.17385	4.87e-09	2.22e-07	yes	up	0.33	2.17667	0.41	0.36	0.22	1.56	2	2.97	Glyur000608s00025880					ENOG410YES1(S:Function unknown)	XP_004489846.1(PREDICTED: uncharacterized protein LOC101502190 isoform X1 [Cicer arietinum])		PF06075.9(DUF936:Plant protein of unknown function (DUF936))
Glyur000136s00007934	-1.73721	4.89e-09	2.22e-07	yes	down	745.373	163.687	1138.23	462.21	635.68	143.75	194.84	152.47	Glyur000136s00007934	GO:0009534(cellular_component:chloroplast thylakoid); GO:0003849(molecular_function:3-deoxy-7-phosphoheptulonate synthase activity); GO:0009073(biological_process:aromatic amino acid family biosynthetic process)	K01626	E2.5.1.54, aroF, aroG, aroH	map00400(Phenylalanine, tyrosine and tryptophan biosynthesis); map02024(Quorum sensing)	COG3200(S:Function unknown)	XP_020221768.1(phospho-2-dehydro-3-deoxyheptonate aldolase 2, chloroplastic-like [Cajanus cajan])	sp|Q00218|AROG_ARATH(Phospho-2-dehydro-3-deoxyheptonate aldolase 2, chloroplastic OS=Arabidopsis thaliana OX=3702 GN=DHS2 PE=2 SV=2)	PF01474.13(DAHP_synth_2:Class-II DAHP synthetase family)
Glyur000053s00006436	-1.25593	5.26e-09	2.39e-07	yes	down	191.223	59.8133	208.85	193.56	171.26	46.82	69.71	62.91	Glyur000053s00006436	GO:0046872(molecular_function:metal ion binding)				ENOG410YNPP(S:Function unknown); ENOG410Z1Q8(S:Function unknown)	XP_020210128.1(zinc finger protein 4-like [Cajanus cajan])	sp|Q39263|ZFP4_ARATH(Zinc finger protein 4 OS=Arabidopsis thaliana OX=3702 GN=ZFP4 PE=2 SV=2)
Glyur002941s00036701	3.03599	5.38e-09	2.43e-07	yes	up	0.826667	5.09667	0.41	0.88	1.19	5.72	4.78	4.79	Glyur002941s00036701	GO:0016787(molecular_function:hydrolase activity)	K19882	NOTUM	map04310(Wnt signaling pathway)	ENOG410XQKD(S:Function unknown)	XP_004494485.1(PREDICTED: pectin acetylesterase 3-like isoform X1 [Cicer arietinum])	sp|O80731|PAE3_ARATH(Pectin acetylesterase 3 OS=Arabidopsis thaliana OX=3702 GN=PAE3 PE=2 SV=1)	PF03283.10(PAE:Pectinacetylesterase)
Glyur000533s00015056	-1.62219	5.42e-09	2.44e-07	yes	down	31.82	7.66667	42.55	19.37	33.54	6	9.41	7.59	Glyur000533s00015056	GO:0016070(biological_process:RNA metabolic process); GO:0048608(biological_process:reproductive structure development); GO:0097159(molecular_function:organic cyclic compound binding); GO:0005634(cellular_component:nucleus); GO:1901363(molecular_function:heterocyclic compound binding); GO:0000398(biological_process:mRNA splicing, via spliceosome); GO:0000166(molecular_function:nucleotide binding)…				COG0724(S:Function unknown); ENOG410XSAC(S:Function unknown)	XP_006590932.1(PREDICTED: flowering time control protein FPA-like [Glycine max])	sp|Q8LPQ9|FPA_ARATH(Flowering time control protein FPA OS=Arabidopsis thaliana OX=3702 GN=FPA PE=1 SV=2)	PF00076.19(RRM_1:RNA recognition motif. (a.k.a. RRM, RBD, or RNP domain)); PF16842.2(RRM_occluded:Occluded RNA-recognition motif); PF07744.10(SPOC:SPOC domain)
Glyur001296s00027386	2.3163	5.43e-09	2.44e-07	yes	up	1.57	4.97	1.54	1.79	1.38	3.47	7.15	4.29	Glyur001296s00027386	GO:0000911(biological_process:cytokinesis by cell plate formation); GO:0009555(biological_process:pollen development); GO:0008017(molecular_function:microtubule binding); GO:0009558(biological_process:embryo sac cellularization); GO:0007018(biological_process:microtubule-based movement); GO:0003777(molecular_function:microtubule motor activity); GO:0016887(molecular_function:ATPase activity); GO:…	K11498	CENPE		COG5059(S:Function unknown)	XP_004512893.1(PREDICTED: kinesin-like protein NACK1 [Cicer arietinum])	sp|Q8S950|KN7A_TOBAC(Kinesin-like protein NACK1 OS=Nicotiana tabacum OX=4097 GN=NACK1 PE=1 SV=1)	PF11995.5(DUF3490:Domain of unknown function (DUF3490)); PF00225.20(Kinesin:Kinesin motor domain); PF16796.2(Microtub_bd:Microtubule binding)
Glyur000147s00013829	-1.04372	5.41e-09	2.44e-07	yes	down	15.5633	5.7	17.98	14.54	14.17	4.91	6.16	6.03	Glyur000147s00013829	GO:0005737(cellular_component:cytoplasm); GO:0003697(molecular_function:single-stranded DNA binding); GO:0005634(cellular_component:nucleus); GO:0006298(biological_process:mismatch repair); GO:0006289(biological_process:nucleotide-excision repair); GO:0071942(cellular_component:XPC complex); GO:0000111(cellular_component:nucleotide-excision repair factor 2 complex); GO:0003684(molecular_function:…	K10838	XPC	map03420(Nucleotide excision repair)	COG5535(L:Replication, recombination and repair)	XP_012573790.1(PREDICTED: DNA repair protein complementing XP-C cells homolog isoform X1 [Cicer arietinum])	sp|Q8W489|RAD4_ARATH(DNA repair protein RAD4 OS=Arabidopsis thaliana OX=3702 GN=RAD4 PE=1 SV=1)	PF10405.6(BHD_3:Rad4 beta-hairpin domain 3); PF03835.12(Rad4:Rad4 transglutaminase-like domain); PF10403.6(BHD_1:Rad4 beta-hairpin domain 1); PF10404.6(BHD_2:Rad4 beta-hairpin domain 2); PF01841.16(Transglut_core:Transglutaminase-like superfamily)
Glyur000032s00003863	1.38269	5.49e-09	2.46e-07	yes	up	8.31	15.7633	9.56	7.33	8.04	15.46	14.89	16.94	Glyur000032s00003863					ENOG410YHFG(S:Function unknown)	XP_004505337.1(PREDICTED: LOB domain-containing protein 4-like [Cicer arietinum])	sp|Q9SHE9|LBD4_ARATH(LOB domain-containing protein 4 OS=Arabidopsis thaliana OX=3702 GN=LBD4 PE=1 SV=1)	PF03195.11(DUF260:Protein of unknown function DUF260)
Glyur000123s00008416	2.97638	5.69e-09	2.53e-07	yes	up	8.98	48.86	16.96	6.59	3.39	53.29	42.22	51.07	Glyur000123s00008416	GO:0005618(cellular_component:cell wall); GO:0016020(cellular_component:membrane); GO:0005576(cellular_component:extracellular region); GO:0009664(biological_process:plant-type cell wall organization)				ENOG410YEM2(S:Function unknown); ENOG410YC36(G:Carbohydrate transport and metabolism)	XP_004505858.1(PREDICTED: expansin-A6-like [Cicer arietinum])	sp|Q38865|EXPA6_ARATH(Expansin-A6 OS=Arabidopsis thaliana OX=3702 GN=EXPA6 PE=2 SV=2)	PF01357.18(Pollen_allerg_1:Pollen allergen); PF03330.15(DPBB_1:Lytic transglycolase)
Glyur000455s00015986	5.13791	5.69e-09	2.53e-07	yes	up	0.0866667	2.4	0	0.13	0.13	2.96	1.75	2.49	Glyur000455s00015986	GO:0016021(cellular_component:integral component of membrane); GO:0016020(cellular_component:membrane)				ENOG410YCFN(S:Function unknown)	XP_004492457.1(PREDICTED: protein trichome birefringence-like 3 isoform X1 [Cicer arietinum])	sp|Q8LED3|TBL3_ARATH(Protein trichome birefringence-like 3 OS=Arabidopsis thaliana OX=3702 GN=TBL3 PE=2 SV=1)	PF13839.3(PC-Esterase:GDSL/SGNH-like Acyl-Esterase family found in Pmr5 and Cas1p); PF14416.3(PMR5N:PMR5 N terminal Domain)
Glyur003117s00039297	3.35827	5.72e-09	2.54e-07	yes	up	1.52667	12.01	0.53	1.62	2.43	11.7	9.77	14.56	Glyur003117s00039297					ENOG410ZJS8(S:Function unknown)	XP_004515634.1(PREDICTED: uncharacterized protein LOC101506729 [Cicer arietinum])		PF05003.9(DUF668:Protein of unknown function (DUF668)); PF11961.5(DUF3475:Domain of unknown function (DUF3475))
Glyur000129s00012476	3.71066	5.92e-09	2.62e-07	yes	up	0.76	7.53	0.98	1.13	0.17	8.27	6.53	7.79	Glyur000129s00012476	GO:0006633(biological_process:fatty acid biosynthetic process); GO:0016021(cellular_component:integral component of membrane); GO:0016747(molecular_function:transferase activity, transferring acyl groups other than amino-acyl groups)	K15397	KCS	map00062(Fatty acid elongation)	ENOG410Y5VH(I:Lipid transport and metabolism)	XP_003536202.1(PREDICTED: 3-ketoacyl-CoA synthase 11 [Glycine max])	sp|O48780|KCS11_ARATH(3-ketoacyl-CoA synthase 11 OS=Arabidopsis thaliana OX=3702 GN=KCS11 PE=1 SV=1)	PF08392.9(FAE1_CUT1_RppA:FAE1/Type III polyketide synthase-like protein); PF08541.7(ACP_syn_III_C:3-Oxoacyl-[acyl-carrier-protein (ACP)] synthase III C terminal); PF02797.12(Chal_sti_synt_C:Chalcone and stilbene synthases, C-terminal domain)
Glyur000163s00011105	4.9708	5.92e-09	2.62e-07	yes	up	0.283333	6.81	0.48	0.37	0	4.96	5.16	10.31	Glyur000163s00011105	GO:0004478(molecular_function:methionine adenosyltransferase activity); GO:0006556(biological_process:S-adenosylmethionine biosynthetic process); GO:0006730(biological_process:one-carbon metabolic process); GO:0046872(molecular_function:metal ion binding); GO:0005829(cellular_component:cytosol); GO:0005524(molecular_function:ATP binding)	K00789	metK	map00270(Cysteine and methionine metabolism)	COG0192(H:Coenzyme transport and metabolism)	XP_016207793.1(S-adenosylmethionine synthase 3 [Arachis ipaensis])	sp|Q96553|METK3_CATRO(S-adenosylmethionine synthase 3 OS=Catharanthus roseus OX=4058 GN=SAMS3 PE=1 SV=1)	PF02773.13(S-AdoMet_synt_C:S-adenosylmethionine synthetase, C-terminal domain); PF02772.13(S-AdoMet_synt_M:S-adenosylmethionine synthetase, central domain); PF00438.17(S-AdoMet_synt_N:S-adenosylmethionine synthetase, N-terminal domain)
Glyur000516s00022255	4.85134	5.96e-09	2.63e-07	yes	up	0.0866667	1.93667	0	0.11	0.15	2.03	1.61	2.17	Glyur000516s00022255					ENOG410YFMK(S:Function unknown)	XP_020218564.1(uncharacterized protein LOC109801839 [Cajanus cajan])	sp|Q5XVI1|SINE1_ARATH(Protein SINE1 OS=Arabidopsis thaliana OX=3702 GN=SINE1 PE=1 SV=1)
Glyur005570s00035455	-4.26431	5.99e-09	2.64e-07	yes	down	86.3767	3.64667	35.56	81.53	142.04	0.52	5.53	4.89	Glyur005570s00035455	GO:0008375(molecular_function:acetylglucosaminyltransferase activity); GO:0016021(cellular_component:integral component of membrane); GO:0016020(cellular_component:membrane)				ENOG410ZJRX(S:Function unknown); ENOG410XPN3(U:Intracellular trafficking, secretion, and vesicular transport)	XP_020222044.1(uncharacterized protein LOC109804602 [Cajanus cajan])	sp|O22224|NP93A_ARATH(Nuclear pore complex protein NUP93A OS=Arabidopsis thaliana OX=3702 GN=NUP93A PE=1 SV=2)	PF02485.18(Branch:Core-2/I-Branching enzyme)
Glyur000017s00002410	3.48552	6.11e-09	2.69e-07	yes	up	2.96667	26.8233	2.09	5.58	1.23	30.6	28.21	21.66	Glyur000017s00002410	GO:0006855(biological_process:drug transmembrane transport); GO:0016021(cellular_component:integral component of membrane); GO:0016020(cellular_component:membrane); GO:0015297(molecular_function:antiporter activity); GO:0015238(molecular_function:drug transmembrane transporter activity); GO:0022857(molecular_function:transmembrane transporter activity); GO:0055085(biological_process:transmembrane…				COG0534(V:Defense mechanisms)	XP_003607029.1(protein DETOXIFICATION 46, chloroplastic [Medicago truncatula])	sp|Q8W4G3|DTX46_ARATH(Protein DETOXIFICATION 46, chloroplastic OS=Arabidopsis thaliana OX=3702 GN=DTX46 PE=2 SV=1)	PF01554.15(MatE:MatE); PF14667.3(Polysacc_synt_C:Polysaccharide biosynthesis C-terminal domain)
Glyur000128s00010804	1.99231	6.13e-09	2.69e-07	yes	up	2.18	6.35667	3.05	1.34	2.15	5.84	5.86	7.37	Glyur000128s00010804					ENOG4111IDD(S:Function unknown); ENOG410XRTN(S:Function unknown)	PNX93081.1(U-box domain-containing protein 7-like, partial [Trifolium pratense])	sp|Q9C7G1|PUB45_ARATH(U-box domain-containing protein 45 OS=Arabidopsis thaliana OX=3702 GN=PUB45 PE=1 SV=1)	PF00514.20(Arm:Armadillo/beta-catenin-like repeat)
Glyur005449s00045669	3.90213	6.34e-09	2.78e-07	yes	up	0.43	4.94	0.39	0.76	0.14	4.56	4.79	5.47	Glyur005449s00045669	GO:0006906(biological_process:vesicle fusion); GO:0000149(molecular_function:SNARE binding); GO:0016192(biological_process:vesicle-mediated transport); GO:0016021(cellular_component:integral component of membrane); GO:0006887(biological_process:exocytosis); GO:0005622(cellular_component:intracellular); GO:0061025(biological_process:membrane fusion); GO:0048278(biological_process:vesicle docking);…	K08486	STX1B_2_3	map04130(SNARE interactions in vesicular transport); map04721(Synaptic vesicle cycle)	COG5074(K:Transcription)	XP_004511657.1(PREDICTED: syntaxin-related protein KNOLLE [Cicer arietinum])	sp|Q42374|SY111_ARATH(Syntaxin-related protein KNOLLE OS=Arabidopsis thaliana OX=3702 GN=KN PE=1 SV=1)	PF00804.22(Syntaxin:Syntaxin)
Glyur005543s00046018	-3.2065	6.38e-09	2.79e-07	yes	down	23.0333	1.82667	41.26	9.63	18.21	1.28	2.83	1.37	Glyur005543s00046018
Glyur000014s00002548	-1.23367	6.42e-09	2.8e-07	yes	down	46.6367	15.14	50.24	46.13	43.54	11.61	18.87	14.94	Glyur000014s00002548	GO:0005622(cellular_component:intracellular); GO:0003924(molecular_function:GTPase activity); GO:0006412(biological_process:translation); GO:0005525(molecular_function:GTP binding)	K06207	typA, bipA		COG1217(S:Function unknown)	XP_003527397.1(PREDICTED: GTP-binding protein TypA/BipA homolog [Glycine max])	sp|O07631|TYPA_BACSU(GTP-binding protein TypA/BipA homolog OS=Bacillus subtilis (strain 168) OX=224308 GN=typA PE=3 SV=1)	PF00009.24(GTP_EFTU:Elongation factor Tu GTP binding domain); PF00679.21(EFG_C:Elongation factor G C-terminus); PF03144.22(GTP_EFTU_D2:Elongation factor Tu domain 2); PF01926.20(MMR_HSR1:50S ribosome-binding GTPase)
Glyur000238s00016799	-1.65073	6.6e-09	2.87e-07	yes	down	25.2867	10.22	27.25	21.37	27.24	10.87	11.28	8.51	Glyur000238s00016799					ENOG41107P8(S:Function unknown); COG0187(S:Function unknown); ENOG410YHCT(S:Function unknown); ENOG410YIMV(K:Transcription)	XP_004492406.1(PREDICTED: uncharacterized protein LOC101501146 isoform X1 [Cicer arietinum])	sp|Q9LDD4|ARID2_ARATH(AT-rich interactive domain-containing protein 2 OS=Arabidopsis thaliana OX=3702 GN=ARID2 PE=1 SV=1)
Glyur000085s00008839	1.7615	6.65e-09	2.88e-07	yes	up	6.09333	15.31	7.07	3.4	7.81	12.76	16.11	17.06	Glyur000085s00008839	GO:0016021(cellular_component:integral component of membrane)				ENOG411011I(S:Function unknown); ENOG410XQR0(S:Function unknown); ENOG410XQWC(U:Intracellular trafficking, secretion, and vesicular transport); ENOG410ZK55(U:Intracellular trafficking, secretion, and vesicular transport); ENOG410ZJAQ(S:Function unknown)	XP_020219156.1(formin-like protein 1 [Cajanus cajan])	sp|Q9SE97|FH1_ARATH(Formin-like protein 1 OS=Arabidopsis thaliana OX=3702 GN=FH1 PE=1 SV=1)	PF02181.20(FH2:Formin Homology 2 Domain)
Glyur000373s00018534	1.9719	6.87e-09	2.97e-07	yes	up	3.41	10.1233	3.54	3.92	2.77	11.18	9.76	9.43	Glyur000373s00018534					ENOG4111G8S(S:Function unknown)	XP_003524822.1(PREDICTED: uncharacterized protein LOC100804718 [Glycine max])
Glyur001962s00035253	3.28443	6.94e-09	3e-07	yes	up	7.67667	54.2533	9.11	7.53	6.39	90.64	53.68	18.44	Glyur001962s00035253	GO:0009664(biological_process:plant-type cell wall organization); GO:0020037(molecular_function:heme binding); GO:0004601(molecular_function:peroxidase activity); GO:0098869(biological_process:cellular oxidant detoxification); GO:0042744(biological_process:hydrogen peroxide catabolic process); GO:0009505(cellular_component:plant-type cell wall); GO:0046872(molecular_function:metal ion binding); G…	K00430	E1.11.1.7	map00940(Phenylpropanoid biosynthesis)	ENOG410ZMT4(G:Carbohydrate transport and metabolism)	NP_001242769.1(peroxidase precursor [Glycine max])	sp|Q96520|PER12_ARATH(Peroxidase 12 OS=Arabidopsis thaliana OX=3702 GN=PER12 PE=1 SV=1)	PF00141.20(peroxidase:Peroxidase)
Glyur000045s00009978	1.61712	7.04e-09	3.03e-07	yes	up	1.70333	3.88333	2.18	1.15	1.78	3.41	3.91	4.33	Glyur000045s00009978	GO:0006468(biological_process:protein phosphorylation); GO:0016020(cellular_component:membrane); GO:0016310(biological_process:phosphorylation); GO:0016021(cellular_component:integral component of membrane); GO:0004672(molecular_function:protein kinase activity); GO:0000166(molecular_function:nucleotide binding); GO:0006952(biological_process:defense response); GO:0004674(molecular_function:prote…				COG0515(T:Signal transduction mechanisms)	XP_020237974.1(G-type lectin S-receptor-like serine/threonine-protein kinase At4g27290 [Cajanus cajan])	sp|O81832|Y4729_ARATH(G-type lectin S-receptor-like serine/threonine-protein kinase At4g27290 OS=Arabidopsis thaliana OX=3702 GN=At4g27290 PE=3 SV=4)	PF01453.21(B_lectin:D-mannose binding lectin); PF00954.17(S_locus_glycop:S-locus glycoprotein domain); PF08276.8(PAN_2:PAN-like domain)
Glyur000958s00027845	2.74563	7.09e-09	3.05e-07	yes	up	1.57	7.89	2.21	1.85	0.65	8.18	7.38	8.11	Glyur000958s00027845		K04733	IRAK4	map05140(Leishmaniasis); map05152(Tuberculosis); map05142(Chagas disease (American trypanosomiasis)); map05162(Measles); map04624(Toll and Imd signaling pathway); map04010(MAPK signaling pathway); map05169(Epstein-Barr virus infection); map04620(Toll-like receptor signaling pathway); map04621(NOD-like receptor signaling pathway); map05133(Pertussis); map05164(Influenza A); map04064(NF-kappa B sig…	ENOG4111IV8(T:Signal transduction mechanisms); ENOG410Y9HF(T:Signal transduction mechanisms)	XP_004512763.1(PREDICTED: probable inactive receptor kinase RLK902 [Cicer arietinum])	sp|Q9LVI6|RLK90_ARATH(Probable inactive receptor kinase RLK902 OS=Arabidopsis thaliana OX=3702 GN=RLK902 PE=1 SV=1)	PF00069.22(Pkinase:Protein kinase domain); PF07714.14(Pkinase_Tyr:Protein tyrosine kinase); PF13855.3(LRR_8:Leucine rich repeat); PF12799.4(LRR_4:Leucine Rich repeats (2 copies)); PF08263.9(LRRNT_2:Leucine rich repeat N-terminal domain)
Glyur003785s00046631	2.80296	7.35e-09	3.15e-07	yes	up	5.61667	29.59	3.72	3.62	9.51	19.13	28.78	40.86	Glyur003785s00046631	GO:0016491(molecular_function:oxidoreductase activity)				COG0277(C:Energy production and conversion)	PNX97293.1(reticuline oxidase-like protein [Trifolium pratense])	sp|Q9FKV2|BBE23_ARATH(Berberine bridge enzyme-like 23 OS=Arabidopsis thaliana OX=3702 GN=At5g44360 PE=2 SV=1)	PF08031.9(BBE:Berberine and berberine like); PF01565.20(FAD_binding_4:FAD binding domain)
Glyur000266s00012606	5.30883	7.34e-09	3.15e-07	yes	up	0.323333	10.7667	0.02	0.76	0.19	16.28	10.25	5.77	Glyur000266s00012606	GO:0005737(cellular_component:cytoplasm); GO:0008757(molecular_function:S-adenosylmethionine-dependent methyltransferase activity); GO:0032259(biological_process:methylation); GO:0055114(biological_process:oxidation-reduction process); GO:0016491(molecular_function:oxidoreductase activity)	K00574	cfa		COG2907(S:Function unknown)	XP_012569842.1(PREDICTED: uncharacterized protein LOC101501999 isoform X1 [Cicer arietinum])	sp|O53732|UFAA1_MYCTU(Tuberculostearic acid methyltransferase UfaA1 OS=Mycobacterium tuberculosis (strain ATCC 25618 / H37Rv) OX=83332 GN=ufaA1 PE=1 SV=3)	PF02353.17(CMAS:Mycolic acid cyclopropane synthetase); PF13649.3(Methyltransf_25:Methyltransferase domain); PF08242.9(Methyltransf_12:Methyltransferase domain); PF13847.3(Methyltransf_31:Methyltransferase domain); PF08241.9(Methyltransf_11:Methyltransferase domain); PF13489.3(Methyltransf_23:Methyltransferase domain); PF05175.11(MTS:Methyltransferase small domain)
Glyur000128s00010764	3.72254	7.4e-09	3.16e-07	yes	up	24.93	254.647	5.93	42.51	26.35	236.97	227.09	299.88	Glyur000128s00010764					ENOG41104NH(S:Function unknown); ENOG41116V5(U:Intracellular trafficking, secretion, and vesicular transport); ENOG410YGJA(S:Function unknown)	GAU20851.1(hypothetical protein TSUD_120430 [Trifolium subterraneum])	sp|Q9SS03|DIR21_ARATH(Dirigent protein 21 OS=Arabidopsis thaliana OX=3702 GN=DIR21 PE=3 SV=1)	PF03018.11(Dirigent:Dirigent-like protein)
Glyur000034s00002962	2.12704	7.72e-09	3.29e-07	yes	up	4.41333	15.17	3.1	5.76	4.38	12.65	15.52	17.34	Glyur000034s00002962		K20285	RABEPK		ENOG410Y5WM(U:Intracellular trafficking, secretion, and vesicular transport)	KHN23229.1(Rab9 effector protein with kelch motifs [Glycine soja])	sp|Q5EA50|RABEK_BOVIN(Rab9 effector protein with kelch motifs OS=Bos taurus OX=9913 GN=RABEPK PE=2 SV=1)	PF13415.3(Kelch_3:Galactose oxidase, central domain); PF13418.3(Kelch_4:Galactose oxidase, central domain); PF13964.3(Kelch_6:Kelch motif); PF01344.22(Kelch_1:Kelch motif); PF13854.3(Kelch_5:Kelch motif); PF07646.12(Kelch_2:Kelch motif)
Glyur000191s00015617	1.85557	7.8e-09	3.32e-07	yes	up	4.65667	12.8133	4.19	4.23	5.55	8.72	13.35	16.37	Glyur000191s00015617	GO:0016021(cellular_component:integral component of membrane)				ENOG410XSPF(S:Function unknown)	NP_001240866.1(uncharacterized protein LOC100804729 [Glycine max])	sp|Q9ASU8|NDL2_ARATH(Protein NDL2 OS=Arabidopsis thaliana OX=3702 GN=NDL2 PE=1 SV=1)	PF03096.11(Ndr:Ndr family); PF00561.17(Abhydrolase_1:alpha/beta hydrolase fold); PF12146.5(Hydrolase_4:Serine aminopeptidase, S33); PF12697.4(Abhydrolase_6:Alpha/beta hydrolase family)
Glyur000189s00009608	3.68493	8.08e-09	3.43e-07	yes	up	2.52	23.3467	2.41	1.45	3.7	17.85	17.2	34.99	Glyur000189s00009608						XP_020221810.1(classical arabinogalactan protein 26-like [Cajanus cajan])
Glyur000727s00025950	-1.777	8.36e-09	3.54e-07	yes	down	77.9067	12.4667	112.68	51.13	69.91	7.08	17.28	13.04	Glyur000727s00025950					ENOG410YRED(S:Function unknown); ENOG410YC00(S:Function unknown)	PNY14809.1(hypothetical protein L195_g011496 [Trifolium pratense])
Glyur000091s00010511	3.79997	8.43e-09	3.56e-07	yes	up	0.283333	3.16	0.14	0.37	0.34	1.73	4.59	3.16	Glyur000091s00010511	GO:0030570(molecular_function:pectate lyase activity); GO:0045490(biological_process:pectin catabolic process); GO:0046872(molecular_function:metal ion binding)	K01728	pel	map00040(Pentose and glucuronate interconversions); map02024(Quorum sensing)	COG3866(G:Carbohydrate transport and metabolism)	XP_020240508.1(pectate lyase-like [Cajanus cajan])	sp|O24554|PLY_ZINVI(Pectate lyase OS=Zinnia violacea OX=34245 PE=1 SV=1)	PF00544.16(Pec_lyase_C:Pectate lyase); PF13229.3(Beta_helix:Right handed beta helix region)
Glyur000061s00006574	4.05837	8.55e-09	3.61e-07	yes	up	4.05333	60.03	0.93	8.35	2.88	78.09	60.34	41.66	Glyur000061s00006574	GO:0004029(molecular_function:aldehyde dehydrogenase (NAD) activity); GO:0008152(biological_process:metabolic process); GO:0016491(molecular_function:oxidoreductase activity)	K12355	REF1	map00940(Phenylpropanoid biosynthesis)	COG1012(C:Energy production and conversion)	AFK35637.1(unknown [Lotus japonicus])	sp|Q56YU0|AL2C4_ARATH(Aldehyde dehydrogenase family 2 member C4 OS=Arabidopsis thaliana OX=3702 GN=ALDH2C4 PE=1 SV=2)	PF00171.19(Aldedh:Aldehyde dehydrogenase family)
Glyur003531s00039537	5.3969	8.78e-09	3.7e-07	yes	up	0.143333	4.99333	0	0.37	0.06	5.43	3.68	5.87	Glyur003531s00039537	GO:0005794(cellular_component:Golgi apparatus); GO:0042546(biological_process:cell wall biogenesis); GO:0009834(biological_process:plant-type secondary cell wall biogenesis); GO:0016021(cellular_component:integral component of membrane); GO:0016020(cellular_component:membrane); GO:0016757(molecular_function:transferase activity, transferring glycosyl groups); GO:0045492(biological_process:xylan b…	K20890	GUX		COG5597(S:Function unknown)	XP_004499061.1(PREDICTED: UDP-glucuronate:xylan alpha-glucuronosyltransferase 2 isoform X1 [Cicer arietinum])	sp|Q8GWW4|GUX2_ARATH(UDP-glucuronate:xylan alpha-glucuronosyltransferase 2 OS=Arabidopsis thaliana OX=3702 GN=GUX2 PE=2 SV=1)	PF01501.17(Glyco_transf_8:Glycosyl transferase family 8)
Glyur000149s00009555	-1.2201	8.96e-09	3.77e-07	yes	down	70.0033	22.67	74.91	55.07	80.03	16.93	27.27	23.81	Glyur000149s00009555	GO:0005634(cellular_component:nucleus)				ENOG4111K05(S:Function unknown)	XP_004495928.1(PREDICTED: uncharacterized protein LOC101511423 [Cicer arietinum])	sp|Q02614|S30BP_MOUSE(SAP30-binding protein OS=Mus musculus OX=10090 GN=Sap30bp PE=1 SV=2)	PF07818.10(HCNGP:HCNGP-like protein)
Glyur000144s00012237	-1.96602	9.15e-09	3.84e-07	yes	down	224.39	41.7533	349.29	131.97	191.91	33.71	54.4	37.15	Glyur000144s00012237	GO:0006914(biological_process:autophagy); GO:0006995(biological_process:cellular response to nitrogen starvation)	K08341	GABARAP, ATG8, LC3	map04136(Autophagy - other); map04137(Mitophagy - animal); map05167(Kaposi sarcoma-associated herpesvirus infection); map04138(Autophagy - yeast); map04139(Mitophagy - yeast); map04068(FoxO signaling pathway); map04621(NOD-like receptor signaling pathway); map04371(Apelin signaling pathway); map04727(GABAergic synapse); map04212(Longevity regulating pathway - worm); map04140(Autophagy - animal)	ENOG4111JAT(U:Intracellular trafficking, secretion, and vesicular transport)	AFK33336.1(unknown [Lotus japonicus])	sp|Q8S925|ATG8H_ARATH(Autophagy-related protein 8h OS=Arabidopsis thaliana OX=3702 GN=ATG8H PE=1 SV=1)	PF02991.13(Atg8:Autophagy protein Atg8 ubiquitin like); PF04110.10(APG12:Ubiquitin-like autophagy protein Apg12)
Glyur000088s00007710	-1.11941	9.36e-09	3.92e-07	yes	down	26.8233	9.16	29.68	21.88	28.91	8.25	11.06	8.17	Glyur000088s00007710	GO:0046658(cellular_component:anchored component of plasma membrane); GO:0016021(cellular_component:integral component of membrane); GO:0005975(biological_process:carbohydrate metabolic process); GO:0030247(molecular_function:polysaccharide binding); GO:0004553(molecular_function:hydrolase activity, hydrolyzing O-glycosyl compounds)				ENOG410Y907(S:Function unknown)	XP_012569992.1(PREDICTED: glucan endo-1,3-beta-glucosidase 5 [Cicer arietinum])	sp|Q9M088|E135_ARATH(Glucan endo-1,3-beta-glucosidase 5 OS=Arabidopsis thaliana OX=3702 GN=At4g31140 PE=1 SV=1)	PF00332.15(Glyco_hydro_17:Glycosyl hydrolases family 17); PF07983.10(X8:X8 domain)
Glyur000836s00028095	-1.17311	9.43e-09	3.93e-07	yes	down	78.8333	26.3633	93.41	62.62	80.47	19.21	28.83	31.05	Glyur000836s00028095		K04650	NCOR1, N-CoR	map01522(Endocrine resistance); map04919(Thyroid hormone signaling pathway); map05202(Transcriptional misregulation in cancer)	ENOG410YDXP(K:Transcription)	XP_004489929.1(PREDICTED: uncharacterized protein LOC101505283 isoform X1 [Cicer arietinum])	sp|Q4KKX4|NCOR1_XENTR(Nuclear receptor corepressor 1 OS=Xenopus tropicalis OX=8364 GN=ncor1 PE=2 SV=1)	PF00249.28(Myb_DNA-binding:Myb-like DNA-binding domain); PF15963.2(Myb_DNA-bind_7:Myb DNA-binding like); PF13921.3(Myb_DNA-bind_6:Myb-like DNA-binding domain)
Glyur005070s00047292	5.42972	9.42e-09	3.93e-07	yes	up	0.12	4.11667	0	0.27	0.09	3.71	4.72	3.92	Glyur005070s00047292	GO:0044550(biological_process:secondary metabolite biosynthetic process); GO:0046872(molecular_function:metal ion binding); GO:0016491(molecular_function:oxidoreductase activity); GO:0016020(cellular_component:membrane); GO:0016709(molecular_function:oxidoreductase activity, acting on paired donors, with incorporation or reduction of molecular oxygen, NAD(P)H as one donor, and incorporation of on…				COG2124(Q:Secondary metabolites biosynthesis, transport and catabolism)	XP_024638375.1(LOW QUALITY PROTEIN: geraniol 8-hydroxylase [Medicago truncatula])	sp|D1MI46|C76BA_SWEMU(Geraniol 8-hydroxylase OS=Swertia mussotii OX=137888 GN=CYP76B10 PE=1 SV=1)	PF00067.19(p450:Cytochrome P450)
Glyur000983s00021690	-1.22065	9.45e-09	3.93e-07	yes	down	238.207	77.03	325.36	159.96	229.3	65.7	93.42	71.97	Glyur000983s00021690	GO:0071011(cellular_component:precatalytic spliceosome); GO:0071013(cellular_component:catalytic step 2 spliceosome); GO:0000398(biological_process:mRNA splicing, via spliceosome); GO:0005689(cellular_component:U12-type spliceosomal complex); GO:0005686(cellular_component:U2 snRNP); GO:0005684(cellular_component:U2-type spliceosomal complex)	K12829	SF3B2, SAP145, CUS1	map03040(Spliceosome)	COG5182(A:RNA processing and modification)	XP_003541544.1(PREDICTED: splicing factor 3B subunit 2-like isoform X2 [Glycine max])	sp|Q13435|SF3B2_HUMAN(Splicing factor 3B subunit 2 OS=Homo sapiens OX=9606 GN=SF3B2 PE=1 SV=2)	PF04037.10(DUF382:Domain of unknown function (DUF382)); PF04046.13(PSP:PSP)
Glyur000532s00020763	-1.11707	9.6e-09	3.99e-07	yes	down	62.7367	21.9833	76.7	56.97	54.54	17.21	24.32	24.42	Glyur000532s00020763		K10268	FBXL2_20		ENOG410XQ54(S:Function unknown)	XP_004486096.1(PREDICTED: F-box/LRR-repeat protein 4 [Cicer arietinum])	sp|Q9C5D2|FBL4_ARATH(F-box/LRR-repeat protein 4 OS=Arabidopsis thaliana OX=3702 GN=FBL4 PE=2 SV=1)	PF13516.3(LRR_6:Leucine Rich repeat); PF12937.4(F-box-like:F-box-like); PF00646.30(F-box:F-box domain)
Glyur000310s00013630	3.86862	9.63e-09	3.99e-07	yes	up	1.27667	14.8267	0.35	1.67	1.81	7.97	12.33	24.18	Glyur000310s00013630	GO:0052634(molecular_function:C-19 gibberellin 2-beta-dioxygenase activity); GO:0009416(biological_process:response to light stimulus); GO:0055114(biological_process:oxidation-reduction process); GO:0005506(molecular_function:iron ion binding); GO:0046872(molecular_function:metal ion binding); GO:0045487(biological_process:gibberellin catabolic process); GO:0016491(molecular_function:oxidoreducta…	K04125	E1.14.11.13	map00904(Diterpenoid biosynthesis)	COG3491(T:Signal transduction mechanisms)	XP_013445468.1(gibberellin 2-beta-dioxygenase 1 [Medicago truncatula])	sp|Q9SQ80|G2OX1_PEA(Gibberellin 2-beta-dioxygenase 1 OS=Pisum sativum OX=3888 GN=GA2OX1 PE=1 SV=1)	PF03171.17(2OG-FeII_Oxy:2OG-Fe(II) oxygenase superfamily); PF14226.3(DIOX_N:non-haem dioxygenase in morphine synthesis N-terminal)
Glyur000426s00022723	2.29573	1.01e-08	4.17e-07	yes	up	4.63	17.4533	3.59	6.22	4.08	19.97	18.97	13.42	Glyur000426s00022723	GO:0016702(molecular_function:oxidoreductase activity, acting on single donors with incorporation of molecular oxygen, incorporation of two atoms of oxygen); GO:0055114(biological_process:oxidation-reduction process)	K09840	NCED	map00906(Carotenoid biosynthesis)	COG3670(Q:Secondary metabolites biosynthesis, transport and catabolism)	ACU86971.1(9-cis-epoxycarotenoid dioxygenase [Caragana korshinskii])	sp|Q9M6E8|NCED1_PHAVU(9-cis-epoxycarotenoid dioxygenase NCED1, chloroplastic OS=Phaseolus vulgaris OX=3885 GN=NCED1 PE=2 SV=1)	PF03055.12(RPE65:Retinal pigment epithelial membrane protein)
Glyur000731s00024683	2.61922	1.06e-08	4.37e-07	yes	up	1.54667	6.93333	1.98	0.65	2.01	6.13	7.02	7.65	Glyur000731s00024683		K09422	MYBP		COG5147(K:Transcription)	XP_020231015.1(transcription factor RAX2-like [Cajanus cajan])	sp|Q9FKL2|MYB36_ARATH(Transcription factor MYB36 OS=Arabidopsis thaliana OX=3702 GN=MYB36 PE=1 SV=1)	PF00249.28(Myb_DNA-binding:Myb-like DNA-binding domain); PF13921.3(Myb_DNA-bind_6:Myb-like DNA-binding domain)
Glyur000028s00003542	1.17966	1.07e-08	4.38e-07	yes	up	370.097	620.21	366.66	345.69	397.94	672.2	609.16	579.27	Glyur000028s00003542	GO:0044710(biological_process:single-organism metabolic process); GO:0006457(biological_process:protein folding); GO:0015035(molecular_function:protein disulfide oxidoreductase activity); GO:0005829(cellular_component:cytosol); GO:0016671(molecular_function:oxidoreductase activity, acting on a sulfur group of donors, disulfide as acceptor); GO:0005886(cellular_component:plasma membrane); GO:00454…	K03671	trxA	map04621(NOD-like receptor signaling pathway); map05418(Fluid shear stress and atherosclerosis)	COG0526(O:Posttranslational modification, protein turnover, chaperones)	XP_003527904.1(PREDICTED: thioredoxin H-type [Glycine max])	sp|Q43636|TRXH_RICCO(Thioredoxin H-type OS=Ricinus communis OX=3988 PE=3 SV=1)	PF00085.17(Thioredoxin:Thioredoxin); PF13098.3(Thioredoxin_2:Thioredoxin-like domain); PF13905.3(Thioredoxin_8:Thioredoxin-like); PF14595.3(Thioredoxin_9:Thioredoxin); PF13899.3(Thioredoxin_7:Thioredoxin-like); PF08534.7(Redoxin:Redoxin); PF02114.13(Phosducin:Phosducin)
Glyur000494s00017387	-1.30522	1.07e-08	4.38e-07	yes	down	106.657	33.5867	124.01	73.1	122.86	25.81	39.41	35.54	Glyur000494s00017387		K15501	PPP6R3, SAPS3		ENOG410XRM1(T:Signal transduction mechanisms)	XP_020214056.1(serine/threonine-protein phosphatase 6 regulatory subunit 3-B-like [Cajanus cajan])	sp|Q922D4|PP6R3_MOUSE(Serine/threonine-protein phosphatase 6 regulatory subunit 3 OS=Mus musculus OX=10090 GN=Ppp6r3 PE=1 SV=1)	PF04499.12(SAPS:SIT4 phosphatase-associated protein)
Glyur000397s00020478	2.5392	1.07e-08	4.38e-07	yes	up	1.99667	8.63	2.75	1.33	1.91	5.09	8.28	12.52	Glyur000397s00020478		K00660	CHS	map04712(Circadian rhythm - plant); map00941(Flavonoid biosynthesis)	COG3424(Q:Secondary metabolites biosynthesis, transport and catabolism)	ARG41458.1(chalcone synthase [Glycyrrhiza uralensis])	sp|P51088|CHS6_TRISU(Chalcone synthase 6 OS=Trifolium subterraneum OX=3900 GN=CHS6 PE=2 SV=1)	PF00195.16(Chal_sti_synt_N:Chalcone and stilbene synthases, N-terminal domain); PF02797.12(Chal_sti_synt_C:Chalcone and stilbene synthases, C-terminal domain); PF08541.7(ACP_syn_III_C:3-Oxoacyl-[acyl-carrier-protein (ACP)] synthase III C terminal); PF08545.7(ACP_syn_III:3-Oxoacyl-[acyl-carrier-protein (ACP)] synthase III); PF08392.9(FAE1_CUT1_RppA:FAE1/Type III polyketide synthase-like protein)
Glyur000101s00010340	1.65243	1.1e-08	4.52e-07	yes	up	21.81	50.3	26.94	12.46	26.03	45.92	48.13	56.85	Glyur000101s00010340					ENOG410YDUK(S:Function unknown); ENOG411184D(S:Function unknown)	NP_001235949.2(BURP domain protein GmRD22 precursor [Glycine max])	sp|Q08298|RD22_ARATH(BURP domain protein RD22 OS=Arabidopsis thaliana OX=3702 GN=RD22 PE=2 SV=1)	PF03181.12(BURP:BURP domain)
Glyur000261s00014370	1.69434	1.11e-08	4.52e-07	yes	up	2.30667	5.60333	2.81	2.07	2.04	5.6	5.24	5.97	Glyur000261s00014370	GO:0042555(cellular_component:MCM complex); GO:0032508(biological_process:DNA duplex unwinding); GO:0006270(biological_process:DNA replication initiation); GO:0000347(cellular_component:THO complex); GO:0003677(molecular_function:DNA binding); GO:0003678(molecular_function:DNA helicase activity); GO:0005634(cellular_component:nucleus); GO:0005524(molecular_function:ATP binding)	K02541	MCM3	map04110(Cell cycle); map04111(Cell cycle - yeast); map04113(Meiosis - yeast); map03030(DNA replication)	COG1241(S:Function unknown)	XP_004504687.1(PREDICTED: DNA replication licensing factor MCM3 [Cicer arietinum])	sp|Q9FL33|MCM3_ARATH(DNA replication licensing factor MCM3 OS=Arabidopsis thaliana OX=3702 GN=MCM3 PE=1 SV=1)	PF00493.20(MCM:MCM2/3/5 family); PF14551.3(MCM_N:MCM N-terminal domain); PF01078.18(Mg_chelatase:Magnesium chelatase, subunit ChlI); PF07726.8(AAA_3:ATPase family associated with various cellular activities (AAA))
Glyur000133s00010394	2.75847	1.15e-08	4.67e-07	yes	up	4.78333	23.4433	7.78	1.84	4.73	15.51	22.43	32.39	Glyur000133s00010394	GO:0004497(molecular_function:monooxygenase activity); GO:0016125(biological_process:sterol metabolic process); GO:0020037(molecular_function:heme binding); GO:0016132(biological_process:brassinosteroid biosynthetic process); GO:0016705(molecular_function:oxidoreductase activity, acting on paired donors, with incorporation or reduction of molecular oxygen); GO:0016021(cellular_component:integral …	K20667	CYP716A		COG2124(Q:Secondary metabolites biosynthesis, transport and catabolism)	BAW34647.1(cytochrome P450 716A179 [Glycyrrhiza uralensis])	sp|I7C6E8|C7A52_PANGI(Beta-amyrin 28-oxidase OS=Panax ginseng OX=4054 PE=2 SV=1)	PF00067.19(p450:Cytochrome P450)
Glyur000771s00029726	2.44435	1.2e-08	4.87e-07	yes	up	2.14	8.41667	3.72	1.01	1.69	7.45	7.98	9.82	Glyur000771s00029726		K09285	OVM, ANT		ENOG410Y9X6(K:Transcription)	OIW14922.1(hypothetical protein TanjilG_30641 [Lupinus angustifolius])	sp|Q38914|ANT_ARATH(AP2-like ethylene-responsive transcription factor ANT OS=Arabidopsis thaliana OX=3702 GN=ANT PE=1 SV=2)	PF00847.17(AP2:AP2 domain)
Glyur001363s00029396	-1.39452	1.24e-08	5.04e-07	yes	down	5.79	1.87	6.39	5.46	5.52	1.54	2.12	1.95	Glyur001363s00029396	GO:0006952(biological_process:defense response); GO:0043531(molecular_function:ADP binding)	K13457	RPM1, RPS3	map04626(Plant-pathogen interaction)	COG4886(S:Function unknown)	XP_020226371.1(disease resistance protein RPM1-like [Cajanus cajan])	sp|Q39214|RPM1_ARATH(Disease resistance protein RPM1 OS=Arabidopsis thaliana OX=3702 GN=RPM1 PE=1 SV=1)	PF00931.19(NB-ARC:NB-ARC domain); PF13855.3(LRR_8:Leucine rich repeat); PF12799.4(LRR_4:Leucine Rich repeats (2 copies)); PF13401.3(AAA_22:AAA domain); PF13191.3(AAA_16:AAA ATPase domain); PF05729.9(NACHT:NACHT domain); PF13173.3(AAA_14:AAA domain)
Glyur000742s00025065	1.89179	1.28e-08	5.18e-07	yes	up	4.03667	11.14	3.92	2.69	5.5	10.03	11.39	12	Glyur000742s00025065	GO:0042546(biological_process:cell wall biogenesis); GO:0005618(cellular_component:cell wall); GO:0048046(cellular_component:apoplast); GO:0071555(biological_process:cell wall organization); GO:0016762(molecular_function:xyloglucan:xyloglucosyl transferase activity); GO:0004553(molecular_function:hydrolase activity, hydrolyzing O-glycosyl compounds); GO:0010411(biological_process:xyloglucan metab…	K08235	E2.4.1.207		ENOG410YAVH(G:Carbohydrate transport and metabolism)	XP_003556027.1(PREDICTED: probable xyloglucan endotransglucosylase/hydrolase protein 8 [Glycine max])	sp|Q8L9A9|XTH8_ARATH(Probable xyloglucan endotransglucosylase/hydrolase protein 8 OS=Arabidopsis thaliana OX=3702 GN=XTH8 PE=2 SV=2)	PF00722.18(Glyco_hydro_16:Glycosyl hydrolases family 16); PF06955.9(XET_C:Xyloglucan endo-transglycosylase (XET) C-terminus)
Glyur000077s00006671	2.0539	1.28e-08	5.19e-07	yes	up	6.74333	21.69	4.99	8.79	6.45	19.94	19.84	25.29	Glyur000077s00006671	GO:0016020(cellular_component:membrane)				ENOG410YD5Y(S:Function unknown)	XP_003540838.1(PREDICTED: thaumatin-like protein 1b [Glycine max])	sp|A0A1P8B554|THLP1_ARATH(Thaumatin-like protein 1 OS=Arabidopsis thaliana OX=3702 GN=TLP1 PE=2 SV=1)	PF00314.14(Thaumatin:Thaumatin family)
Glyur000119s00012199	2.68379	1.29e-08	5.21e-07	yes	up	0.793333	3.83667	0.95	0.97	0.46	4.36	3.97	3.18	Glyur000119s00012199	GO:0016021(cellular_component:integral component of membrane); GO:0055114(biological_process:oxidation-reduction process); GO:0016491(molecular_function:oxidoreductase activity)				COG3268(S:Function unknown); COG0231(J:Translation, ribosomal structure and biogenesis)	XP_003621322.1(probable mitochondrial saccharopine dehydrogenase-like oxidoreductase At5g39410 [Medicago truncatula])	sp|Q8LGI2|SCPDL_ARATH(Probable mitochondrial saccharopine dehydrogenase-like oxidoreductase At5g39410 OS=Arabidopsis thaliana OX=3702 GN=At5g39410 PE=1 SV=2)	PF03435.15(Sacchrp_dh_NADP:Saccharopine dehydrogenase NADP binding domain)
Glyur000134s00009747	1.14322	1.3e-08	5.24e-07	yes	up	3.90667	6.54333	4.23	3.64	3.85	5.53	7.08	7.02	Glyur000134s00009747	GO:0048046(cellular_component:apoplast); GO:0009570(cellular_component:chloroplast stroma); GO:0005975(biological_process:carbohydrate metabolic process); GO:0030246(molecular_function:carbohydrate binding); GO:0016853(molecular_function:isomerase activity)	K01792	E5.1.3.15	map00010(Glycolysis / Gluconeogenesis)	COG0676(G:Carbohydrate transport and metabolism); ENOG410Z7Z7(S:Function unknown)	XP_004512056.1(PREDICTED: putative glucose-6-phosphate 1-epimerase [Cicer arietinum])	sp|Q9FJY7|PP449_ARATH(Pentatricopeptide repeat-containing protein At5g66520 OS=Arabidopsis thaliana OX=3702 GN=PCMP-H61 PE=2 SV=1)	PF01263.17(Aldose_epim:Aldose 1-epimerase)
Glyur004148s00040126	-1.84962	1.39e-08	5.58e-07	yes	down	7.27667	2.31333	8.36	6.64	6.83	1.88	2.47	2.59	Glyur004148s00040126	GO:0030955(molecular_function:potassium ion binding); GO:0000287(molecular_function:magnesium ion binding); GO:0004743(molecular_function:pyruvate kinase activity); GO:0016301(molecular_function:kinase activity); GO:0006096(biological_process:glycolytic process)	K00873	PK, pyk	map05165(Human papillomavirus infection); map05203(Viral carcinogenesis); map00230(Purine metabolism); map00620(Pyruvate metabolism); map00010(Glycolysis / Gluconeogenesis); map04922(Glucagon signaling pathway); map05230(Central carbon metabolism in cancer); map04930(Type II diabetes mellitus)	COG0469(G:Carbohydrate transport and metabolism)	XP_015963726.1(pyruvate kinase isozyme G, chloroplastic [Arachis duranensis])	sp|Q40546|KPYG_TOBAC(Pyruvate kinase isozyme G, chloroplastic OS=Nicotiana tabacum OX=4097 PE=2 SV=1)	PF00224.18(PK:Pyruvate kinase, barrel domain)
Glyur000168s00018573	3.82693	1.44e-08	5.79e-07	yes	up	1.14	12.6733	0.52	2.13	0.77	18.48	12.26	7.28	Glyur000168s00018573					ENOG410Y934(S:Function unknown)	XP_020221317.1(F-box protein PP2-A13-like [Cajanus cajan])	sp|Q9LEX0|P2A13_ARATH(F-box protein PP2-A13 OS=Arabidopsis thaliana OX=3702 GN=PP2A13 PE=1 SV=1)	PF14299.3(PP2:Phloem protein 2)
Glyur000079s00008937	2.53658	1.49e-08	5.97e-07	yes	up	0.543333	2.33	0.56	0.5	0.57	2.81	1.97	2.21	Glyur000079s00008937	GO:0006349(biological_process:regulation of gene expression by genetic imprinting); GO:0051574(biological_process:positive regulation of histone H3-K9 methylation); GO:0004003(molecular_function:ATP-dependent DNA helicase activity); GO:0032508(biological_process:DNA duplex unwinding); GO:0044030(biological_process:regulation of DNA methylation); GO:0006346(biological_process:methylation-dependent…	K19001	HELLS, DDM1		COG0553(P:Inorganic ion transport and metabolism); COG0724(S:Function unknown)	XP_020216073.1(ATP-dependent DNA helicase DDM1 [Cajanus cajan])	sp|Q9XFH4|DDM1_ARATH(ATP-dependent DNA helicase DDM1 OS=Arabidopsis thaliana OX=3702 GN=DDM1 PE=1 SV=1)	PF00176.20(SNF2_N:SNF2 family N-terminal domain); PF00271.28(Helicase_C:Helicase conserved C-terminal domain); PF11496.5(HDA2-3:Class II histone deacetylase complex subunits 2 and 3); PF04851.12(ResIII:Type III restriction enzyme, res subunit)
Glyur000434s00017221	3.09604	1.51e-08	6.03e-07	yes	up	0.393333	2.40333	0.78	0.18	0.22	2.06	2.42	2.73	Glyur000434s00017221	GO:0006312(biological_process:mitotic recombination); GO:0000819(biological_process:sister chromatid segregation); GO:0009330(cellular_component:DNA topoisomerase complex (ATP-hydrolyzing)); GO:0000712(biological_process:resolution of meiotic recombination intermediates); GO:0005634(cellular_component:nucleus); GO:0003918(molecular_function:DNA topoisomerase type II (ATP-hydrolyzing) activity); G…	K03164	TOP2	map01524(Platinum drug resistance)	COG0187(L:Replication, recombination and repair)	XP_004499912.1(PREDICTED: DNA topoisomerase 2 [Cicer arietinum])	sp|O24308|TOP2_PEA(DNA topoisomerase 2 OS=Pisum sativum OX=3888 GN=TOP2 PE=2 SV=1)	PF00521.17(DNA_topoisoIV:DNA gyrase/topoisomerase IV, subunit A); PF16898.2(TOPRIM_C:C-terminal associated domain of TOPRIM); PF00204.22(DNA_gyraseB:DNA gyrase B); PF02518.23(HATPase_c:Histidine kinase-, DNA gyrase B-, and HSP90-like ATPase); PF01751.19(Toprim:Toprim domain)
Glyur000663s00030870	-1.64683	1.54e-08	6.12e-07	yes	down	71.0167	17.1967	84.38	50.6	78.07	10.44	22.14	19.01	Glyur000663s00030870
Glyur002700s00036103	5.66611	1.58e-08	6.3e-07	yes	up	0.383333	14.0867	0	1.15	0	13.96	13.46	14.84	Glyur002700s00036103					ENOG411074W(S:Function unknown); ENOG410YRQA(S:Function unknown); ENOG410YQMA(S:Function unknown)	XP_012569567.1(PREDICTED: uncharacterized protein At5g01610-like [Cicer arietinum])	sp|Q9M015|Y5161_ARATH(Uncharacterized protein At5g01610 OS=Arabidopsis thaliana OX=3702 GN=At5g01610 PE=1 SV=1)	PF04398.9(DUF538:Protein of unknown function, DUF538)
Glyur001488s00041211	-2.11462	1.61e-08	6.39e-07	yes	down	25.7	4.04	34.05	25.45	17.6	2.87	4.5	4.75	Glyur001488s00041211
Glyur000663s00030871	1.02049	1.64e-08	6.49e-07	yes	up	51.43	78.45	53.36	48.63	52.3	66.17	79.93	89.25	Glyur000663s00030871					ENOG410YYR9(S:Function unknown)	XP_004488656.1(PREDICTED: tobamovirus multiplication protein 2B isoform X2 [Cicer arietinum])	sp|Q8H960|TOM2B_ARATH(Tobamovirus multiplication protein 2B OS=Arabidopsis thaliana OX=3702 GN=TOM2B PE=2 SV=2)
Glyur000389s00028186	-1.21697	1.64e-08	6.49e-07	yes	down	40.2067	13.1833	41.29	35.89	43.44	9.36	15.38	14.81	Glyur000389s00028186					ENOG410XPMQ(K:Transcription)	XP_014629099.1(PREDICTED: BEL1-like homeodomain protein 9 [Glycine max])	sp|Q9LZM8|BLH9_ARATH(BEL1-like homeodomain protein 9 OS=Arabidopsis thaliana OX=3702 GN=BLH9 PE=1 SV=1)	PF07526.8(POX:Associated with HOX)
Glyur003799s00036831	3.49036	1.65e-08	6.5e-07	yes	up	1.33333	11.63	1.38	2.26	0.36	10.19	11.95	12.75	Glyur003799s00036831	GO:0005215(molecular_function:transporter activity); GO:0016021(cellular_component:integral component of membrane); GO:0055085(biological_process:transmembrane transport)	K14611	SLC23A1_2, SVCT1_2		COG2233(A:RNA processing and modification)	XP_003555298.1(PREDICTED: nucleobase-ascorbate transporter 4-like [Glycine max])	sp|P93039|NAT4_ARATH(Nucleobase-ascorbate transporter 4 OS=Arabidopsis thaliana OX=3702 GN=NAT4 PE=2 SV=2)	PF00860.17(Xan_ur_permease:Permease family)
Glyur000332s00014986	1.85094	1.67e-08	6.57e-07	yes	up	108.363	298.533	81.58	135.48	108.03	307.81	270.98	316.81	Glyur000332s00014986					ENOG410YRT5(S:Function unknown)	NP_001237189.2(putative pollen Ole e 1 allergen and extensin family protein precursor [Glycine max])	sp|Q9LX15|DFC_ARATH(Protein DOWNSTREAM OF FLC OS=Arabidopsis thaliana OX=3702 GN=DFC PE=2 SV=1)	PF01190.14(Pollen_Ole_e_I:Pollen proteins Ole e I like)
Glyur000091s00010537	2.26755	1.72e-08	6.75e-07	yes	up	4.62	16.5733	4.34	5.2	4.32	23.28	14.63	11.81	Glyur000091s00010537					COG0666(S:Function unknown); COG0318(I:Lipid transport and metabolism); COG0318(Q:Secondary metabolites biosynthesis, transport and catabolism)	XP_006604095.1(PREDICTED: kinase D-interacting substrate of 220 kDa-like [Glycine max])	sp|Q9EQG6|KDIS_RAT(Kinase D-interacting substrate of 220 kDa OS=Rattus norvegicus OX=10116 GN=Kidins220 PE=1 SV=2)	PF12796.4(Ank_2:Ankyrin repeats (3 copies)); PF13857.3(Ank_5:Ankyrin repeats (many copies)); PF13637.3(Ank_4:Ankyrin repeats (many copies)); PF00023.27(Ank:Ankyrin repeat)
Glyur000023s00004910	1.17311	1.76e-08	6.88e-07	yes	up	105.143	177.407	125.17	79.1	111.16	176.19	160	196.03	Glyur000023s00004910	GO:0016787(molecular_function:hydrolase activity); GO:0007165(biological_process:signal transduction); GO:0006629(biological_process:lipid metabolic process); GO:0044699(biological_process:single-organism process); GO:0008081(molecular_function:phosphoric diester hydrolase activity)	K05857	PLCD	map04919(Thyroid hormone signaling pathway); map04070(Phosphatidylinositol signaling system); map04020(Calcium signaling pathway); map04933(AGE-RAGE signaling pathway in diabetic complications); map00562(Inositol phosphate metabolism)	ENOG410XPSW(S:Function unknown)	OIW04102.1(hypothetical protein TanjilG_00662 [Lupinus angustifolius])	sp|Q39033|PLCD2_ARATH(Phosphoinositide phospholipase C 2 OS=Arabidopsis thaliana OX=3702 GN=PLC2 PE=1 SV=1)	PF00388.16(PI-PLC-X:Phosphatidylinositol-specific phospholipase C, X domain); PF01248.23(Ribosomal_L7Ae:Ribosomal protein L7Ae/L30e/S12e/Gadd45 family); PF00387.16(PI-PLC-Y:Phosphatidylinositol-specific phospholipase C, Y domain); PF00168.27(C2:C2 domain)
Glyur000019s00002154	-1.20624	1.84e-08	7.2e-07	yes	down	81.71	26.8833	96.44	77.05	71.64	20.99	34.08	25.58	Glyur000019s00002154		K09285	OVM, ANT		ENOG410Y9PK(K:Transcription)	XP_004493481.1(PREDICTED: AP2-like ethylene-responsive transcription factor At2g41710 isoform X1 [Cicer arietinum])	sp|Q8GWK2|AP2L4_ARATH(AP2-like ethylene-responsive transcription factor At2g41710 OS=Arabidopsis thaliana OX=3702 GN=At2g41710 PE=2 SV=2)
Glyur000359s00016710	-1.51165	1.85e-08	7.21e-07	yes	down	224.713	58.77	304.07	152.1	217.97	39.97	70.01	66.33	Glyur000359s00016710	GO:0006397(biological_process:mRNA processing)	K13171	SRRM1, SRM160	map03013(RNA transport); map03015(mRNA surveillance pathway)	ENOG4111IMU(S:Function unknown)	XP_013456152.1(serine/arginine repetitive matrix protein 1 isoform X2 [Medicago truncatula])	sp|Q52KI8|SRRM1_MOUSE(Serine/arginine repetitive matrix protein 1 OS=Mus musculus OX=10090 GN=Srrm1 PE=1 SV=2)	PF01480.14(PWI:PWI domain)
Glyur001397s00036955	9.15255	1.98e-08	7.71e-07	yes	up	0.0133333	4.78333	0	0.04	0	9.4	4.68	0.27	Glyur001397s00036955	GO:0044550(biological_process:secondary metabolite biosynthetic process); GO:0046872(molecular_function:metal ion binding); GO:0016491(molecular_function:oxidoreductase activity); GO:0016020(cellular_component:membrane); GO:0016709(molecular_function:oxidoreductase activity, acting on paired donors, with incorporation or reduction of molecular oxygen, NAD(P)H as one donor, and incorporation of on…	K17961	CYP82G1	map00904(Diterpenoid biosynthesis)	COG2124(Q:Secondary metabolites biosynthesis, transport and catabolism)	XP_013444097.2(cytochrome P450 82G1 [Medicago truncatula])	sp|Q9LSF8|C82G1_ARATH(Cytochrome P450 82G1 OS=Arabidopsis thaliana OX=3702 GN=CYP82G1 PE=1 SV=1)	PF00067.19(p450:Cytochrome P450)
Glyur005264s00044555	2.32376	2.09e-08	8.11e-07	yes	up	2.98333	11.2767	3.61	3.65	1.69	11.06	11.09	11.68	Glyur005264s00044555					COG2050(S:Function unknown)	XP_019415889.1(PREDICTED: 1,4-dihydroxy-2-naphthoyl-CoA thioesterase 1 [Lupinus angustifolius])	sp|Q9SX65|DNAT1_ARATH(1,4-dihydroxy-2-naphthoyl-CoA thioesterase 1 OS=Arabidopsis thaliana OX=3702 GN=DHNAT1 PE=1 SV=1)	PF03061.19(4HBT:Thioesterase superfamily)
Glyur000352s00022303	2.81316	2.09e-08	8.13e-07	yes	up	0.35	1.84	0.53	0.24	0.28	1.19	1.69	2.64	Glyur000352s00022303					ENOG410XPMQ(S:Function unknown); ENOG41121YV(S:Function unknown)	XP_012573713.1(PREDICTED: BEL1-like homeodomain protein 4 [Cicer arietinum])	sp|Q9SW80|BLH2_ARATH(BEL1-like homeodomain protein 2 OS=Arabidopsis thaliana OX=3702 GN=BLH2 PE=1 SV=3)	PF07526.8(POX:Associated with HOX); PF05920.8(Homeobox_KN:Homeobox KN domain); PF00046.26(Homeobox:Homeobox domain)
Glyur000536s00018932	2.79612	2.11e-08	8.17e-07	yes	up	9.12333	50.2667	6.49	15.02	5.86	37.07	44.17	69.56	Glyur000536s00018932	GO:0009579(cellular_component:thylakoid); GO:0009941(cellular_component:chloroplast envelope); GO:0004364(molecular_function:glutathione transferase activity); GO:0009570(cellular_component:chloroplast stroma); GO:0010319(cellular_component:stromule); GO:0005774(cellular_component:vacuolar membrane); GO:0016740(molecular_function:transferase activity); GO:0006749(biological_process:glutathione me…	K00799	GST, gst	map00480(Glutathione metabolism); map05204(Chemical carcinogenesis); map00983(Drug metabolism - other enzymes); map00982(Drug metabolism - cytochrome P450); map00980(Metabolism of xenobiotics by cytochrome P450); map05200(Pathways in cancer); map05418(Fluid shear stress and atherosclerosis); map05225(Hepatocellular carcinoma); map01524(Platinum drug resistance)	COG0625(U:Intracellular trafficking, secretion, and vesicular transport)	KVI03991.1(Glutathione S-transferase/chloride channel, C-terminal [Cynara cardunculus var. scolymus])	sp|P30109|GSTF1_TOBAC(Glutathione S-transferase PARB OS=Nicotiana tabacum OX=4097 GN=PARB PE=2 SV=1)	PF00043.22(GST_C:Glutathione S-transferase, C-terminal domain); PF02798.17(GST_N:Glutathione S-transferase, N-terminal domain); PF13417.3(GST_N_3:Glutathione S-transferase, N-terminal domain); PF13409.3(GST_N_2:Glutathione S-transferase, N-terminal domain); PF14497.3(GST_C_3:Glutathione S-transferase, C-terminal domain); PF13410.3(GST_C_2:Glutathione S-transferase, C-terminal domain)
Glyur000136s00007947	3.56605	2.21e-08	8.51e-07	yes	up	3.09333	27.2367	3.36	4.88	1.04	32.12	18.33	31.26	Glyur000136s00007947
Glyur003154s00036928	7.9401	2.24e-08	8.61e-07	yes	up	0	2.39333	0	0	0	1.16	3.37	2.65	Glyur003154s00036928					ENOG4110851(S:Function unknown); ENOG410YJD3(S:Function unknown)	KEH23715.1(Myb/SANT-like DNA-binding domain protein [Medicago truncatula])		PF12776.4(Myb_DNA-bind_3:Myb/SANT-like DNA-binding domain)
Glyur001013s00034084	8.6316	2.36e-08	9.09e-07	yes	up	0	2.58667	0	0	0	4.24	2.87	0.65	Glyur001013s00034084	GO:0009753(biological_process:response to jasmonic acid); GO:0080027(biological_process:response to herbivore); GO:0009570(cellular_component:chloroplast stroma); GO:0010333(molecular_function:terpene synthase activity); GO:0009611(biological_process:response to wounding); GO:0008152(biological_process:metabolic process)	K12742;K19968	ispS;TPS03	map00900(Terpenoid backbone biosynthesis)	ENOG410YF98(O:Posttranslational modification, protein turnover, chaperones)	KHN41195.1(Isoprene synthase, chloroplastic [Glycine soja])	sp|Q5UB07|TPS4_MEDTR(Tricyclene synthase TPS4, chloroplastic OS=Medicago truncatula OX=3880 GN=TPS4 PE=1 SV=1)	PF03936.13(Terpene_synth_C:Terpene synthase family, metal binding domain); PF01397.18(Terpene_synth:Terpene synthase, N-terminal domain)
Glyur000112s00012333	4.48692	2.39e-08	9.18e-07	yes	up	0.336667	4.57667	0.1	0.64	0.27	2.19	4.24	7.3	Glyur000112s00012333					ENOG410YM8H(S:Function unknown); ENOG41117UA(S:Function unknown)	XP_019459706.1(PREDICTED: uncharacterized protein At1g66480-like isoform X1 [Lupinus angustifolius])	sp|Q6NLC8|Y1648_ARATH(Uncharacterized protein At1g66480 OS=Arabidopsis thaliana OX=3702 GN=At1g66480 PE=2 SV=1)	PF14009.3(DUF4228:Domain of unknown function (DUF4228))
Glyur000201s00012376	1.99677	2.4e-08	9.21e-07	yes	up	5.32	15.9	5.13	3.78	7.05	13.93	21.35	12.42	Glyur000201s00012376	GO:0003677(molecular_function:DNA binding)	K09422	MYBP		COG5147(K:Transcription)	NP_001235789.1(MYB transcription factor MYB84 [Glycine max])	sp|Q9C9G7|MYB62_ARATH(Transcription factor MYB62 OS=Arabidopsis thaliana OX=3702 GN=MYB62 PE=2 SV=1)	PF00249.28(Myb_DNA-binding:Myb-like DNA-binding domain); PF13921.3(Myb_DNA-bind_6:Myb-like DNA-binding domain)
Glyur000664s00026046	3.41046	2.41e-08	9.21e-07	yes	up	1.26333	10.79	0.34	1.73	1.72	9.32	9.59	13.46	Glyur000664s00026046	GO:0042546(biological_process:cell wall biogenesis); GO:0005618(cellular_component:cell wall); GO:0048046(cellular_component:apoplast); GO:0071555(biological_process:cell wall organization); GO:0016762(molecular_function:xyloglucan:xyloglucosyl transferase activity); GO:0004553(molecular_function:hydrolase activity, hydrolyzing O-glycosyl compounds); GO:0010411(biological_process:xyloglucan metab…	K08235	E2.4.1.207		ENOG411167N(G:Carbohydrate transport and metabolism); ENOG410YDGS(G:Carbohydrate transport and metabolism)	KYP68588.1(putative xyloglucan endotransglucosylase/hydrolase protein 32 [Cajanus cajan])	sp|Q9SJL9|XTH32_ARATH(Probable xyloglucan endotransglucosylase/hydrolase protein 32 OS=Arabidopsis thaliana OX=3702 GN=XTH32 PE=2 SV=1)	PF00722.18(Glyco_hydro_16:Glycosyl hydrolases family 16); PF06955.9(XET_C:Xyloglucan endo-transglycosylase (XET) C-terminus)
Glyur000042s00005067	3.44589	2.46e-08	9.4e-07	yes	up	2.36	18.6933	1.74	0.94	4.4	24.49	21.51	10.08	Glyur000042s00005067	GO:0020037(molecular_function:heme binding); GO:0004601(molecular_function:peroxidase activity); GO:0098869(biological_process:cellular oxidant detoxification); GO:0042744(biological_process:hydrogen peroxide catabolic process); GO:0046872(molecular_function:metal ion binding); GO:0006979(biological_process:response to oxidative stress); GO:0055114(biological_process:oxidation-reduction process);…	K00430	E1.11.1.7	map00940(Phenylpropanoid biosynthesis)	ENOG4111FDS(G:Carbohydrate transport and metabolism)	NP_001241630.1(uncharacterized protein LOC100804350 precursor [Glycine max])	sp|Q9SZE7|PER51_ARATH(Peroxidase 51 OS=Arabidopsis thaliana OX=3702 GN=PER51 PE=2 SV=1)	PF00141.20(peroxidase:Peroxidase)
Glyur000103s00007445	2.38393	2.55e-08	9.71e-07	yes	up	0.696667	2.73667	0.7	0.63	0.76	2.49	2.42	3.3	Glyur000103s00007445	GO:0016310(biological_process:phosphorylation); GO:0016301(molecular_function:kinase activity)				COG4886(E:Amino acid transport and metabolism)	PNY07561.1(putative LRR receptor-like protein kinase [Trifolium pratense])	sp|C0LGS2|Y4361_ARATH(Probable LRR receptor-like serine/threonine-protein kinase At4g36180 OS=Arabidopsis thaliana OX=3702 GN=At4g36180 PE=1 SV=1)	PF13855.3(LRR_8:Leucine rich repeat); PF12799.4(LRR_4:Leucine Rich repeats (2 copies)); PF08263.9(LRRNT_2:Leucine rich repeat N-terminal domain)
Glyur000294s00011872	-1.66054	2.57e-08	9.76e-07	yes	down	83.89	19.5367	112.23	62.19	77.25	18.18	25.95	14.48	Glyur000294s00011872					ENOG410YGVK(S:Function unknown)	XP_003522748.1(PREDICTED: AT-hook motif nuclear-localized protein 17-like [Glycine max])	sp|Q9LTA2|AHL17_ARATH(AT-hook motif nuclear-localized protein 17 OS=Arabidopsis thaliana OX=3702 GN=AHL17 PE=2 SV=1)	PF03479.12(DUF296:Domain of unknown function (DUF296))
Glyur000128s00010766	4.16733	2.57e-08	9.76e-07	yes	up	6.41333	131.897	0.74	8.57	9.93	184.96	125.77	84.96	Glyur000128s00010766					ENOG41104NH(S:Function unknown); ENOG410YGJA(S:Function unknown); ENOG41116V5(U:Intracellular trafficking, secretion, and vesicular transport)	XP_004511258.1(PREDICTED: dirigent protein 21-like [Cicer arietinum])	sp|Q9SS03|DIR21_ARATH(Dirigent protein 21 OS=Arabidopsis thaliana OX=3702 GN=DIR21 PE=3 SV=1)	PF03018.11(Dirigent:Dirigent-like protein)
Glyur000175s00012074	3.20485	2.62e-08	9.96e-07	yes	up	0.546667	3.99333	0.19	0.77	0.68	3.36	4.6	4.02	Glyur000175s00012074					ENOG4111WNH(V:Defense mechanisms)	XP_003549864.2(PREDICTED: BAG family molecular chaperone regulator 2-like isoform X1 [Glycine max])	sp|Q0WUQ1|BAG1_ARATH(BAG family molecular chaperone regulator 1 OS=Arabidopsis thaliana OX=3702 GN=BAG1 PE=1 SV=1)	PF02179.13(BAG:BAG domain); PF00240.20(ubiquitin:Ubiquitin family); PF14560.3(Ubiquitin_2:Ubiquitin-like domain)
Glyur000047s00003951	-4.95074	2.69e-08	1.02e-06	yes	down	58.84	1.46	107.75	6.47	62.3	0.46	3.1	0.82	Glyur000047s00003951
Glyur000061s00006550	4.21052	2.71e-08	1.03e-06	yes	up	0.233333	3.34333	0.12	0.31	0.27	2.28	2.25	5.5	Glyur000061s00006550					ENOG410YZ7R(S:Function unknown); ENOG410YW15(S:Function unknown)	XP_003525272.1(PREDICTED: probable protein ABIL5 [Glycine max])	sp|Q5JMF2|ABIL5_ORYSJ(Probable protein ABIL5 OS=Oryza sativa subsp. japonica OX=39947 GN=Os01g0760900 PE=2 SV=1)
Glyur000153s00013683	1.74347	2.76e-08	1.04e-06	yes	up	13.51	27.7967	16.2	8.01	16.32	31.89	25.84	25.66	Glyur000153s00013683	GO:0006413(biological_process:translational initiation); GO:0003743(molecular_function:translation initiation factor activity)	K03238	EIF2S2	map03013(RNA transport)	COG1601(J:Translation, ribosomal structure and biogenesis)	XP_017431036.1(PREDICTED: eukaryotic translation initiation factor 2 subunit beta [Vigna angularis])	sp|P55871|IF2B_MALDO(Eukaryotic translation initiation factor 2 subunit beta OS=Malus domestica OX=3750 PE=2 SV=2)	PF01873.14(eIF-5_eIF-2B:Domain found in IF2B/IF5)
Glyur000803s00029853	2.31265	2.79e-08	1.05e-06	yes	up	4.21333	15.2633	5.74	3.75	3.15	20.47	15.11	10.21	Glyur000803s00029853	GO:0016020(cellular_component:membrane); GO:0005215(molecular_function:transporter activity); GO:0016021(cellular_component:integral component of membrane); GO:0006810(biological_process:transport)	K09875	SIP		COG0580(G:Carbohydrate transport and metabolism); COG0580(O:Posttranslational modification, protein turnover, chaperones)	XP_003624577.1(aquaporin SIP1-2 [Medicago truncatula])	sp|Q9ATM2|SIP12_MAIZE(Aquaporin SIP1-2 OS=Zea mays OX=4577 GN=SIP1-2 PE=2 SV=1)	PF00230.17(MIP:Major intrinsic protein)
Glyur001412s00036654	2.83101	2.8e-08	1.05e-06	yes	up	6.34667	31.8767	12.47	2.35	4.22	32.6	30.61	32.42	Glyur001412s00036654	GO:0005618(cellular_component:cell wall); GO:0004252(molecular_function:serine-type endopeptidase activity); GO:0008236(molecular_function:serine-type peptidase activity); GO:0006508(biological_process:proteolysis)				COG1404(O:Posttranslational modification, protein turnover, chaperones)	XP_014501975.1(subtilisin-like protease SBT1.8 [Vigna radiata var. radiata])	sp|Q9ZUF6|SBT18_ARATH(Subtilisin-like protease SBT1.8 OS=Arabidopsis thaliana OX=3702 GN=SBT1.8 PE=1 SV=1)	PF00082.19(Peptidase_S8:Subtilase family); PF05922.13(Inhibitor_I9:Peptidase inhibitor I9); PF02225.19(PA:PA domain)
Glyur000597s00020324	1.63422	2.83e-08	1.06e-06	yes	up	1.68667	3.91667	1.77	1.32	1.97	3.57	3.59	4.59	Glyur000597s00020324	GO:0016021(cellular_component:integral component of membrane); GO:0005509(molecular_function:calcium ion binding)				ENOG41105IF(U:Intracellular trafficking, secretion, and vesicular transport)	XP_004487890.1(PREDICTED: vacuolar-sorting receptor 6 [Cicer arietinum])	sp|Q9FYH7|VSR6_ARATH(Vacuolar-sorting receptor 6 OS=Arabidopsis thaliana OX=3702 GN=VSR6 PE=2 SV=3)	PF02225.19(PA:PA domain); PF12662.4(cEGF:Complement Clr-like EGF-like)
Glyur001422s00031023	7.75035	2.85e-08	1.07e-06	yes	up	2.47333	434.177	0.18	6.63	0.61	735.05	422.12	145.36	Glyur001422s00031023	GO:0005737(cellular_component:cytoplasm); GO:0004586(molecular_function:ornithine decarboxylase activity); GO:0006596(biological_process:polyamine biosynthetic process); GO:0033387(biological_process:putrescine biosynthetic process from ornithine); GO:0003824(molecular_function:catalytic activity)	K01581	E4.1.1.17, ODC1, speC, speF	map00480(Glutathione metabolism); map00330(Arginine and proline metabolism)	COG0019(E:Amino acid transport and metabolism)	NP_001238629.1(ornithine decarboxylase [Glycine max])	sp|P50134|DCOR_DATST(Ornithine decarboxylase OS=Datura stramonium OX=4076 PE=2 SV=1)	PF02784.13(Orn_Arg_deC_N:Pyridoxal-dependent decarboxylase, pyridoxal binding domain); PF00278.19(Orn_DAP_Arg_deC:Pyridoxal-dependent decarboxylase, C-terminal sheet domain); PF01261.21(AP_endonuc_2:Xylose isomerase-like TIM barrel)
Glyur000045s00009983	4.24325	2.88e-08	1.08e-06	yes	up	344.89	6401.11	37.88	662.09	334.7	5129.12	5635.77	8438.44	Glyur000045s00009983					ENOG410YDUK(S:Function unknown); ENOG410YDAC(S:Function unknown); ENOG411184D(S:Function unknown)	GAU26334.1(hypothetical protein TSUD_101670 [Trifolium subterraneum])	sp|Q43675|USP_VICFA(Unknown seed protein USP OS=Vicia faba OX=3906 GN=USP PE=2 SV=1)	PF03181.12(BURP:BURP domain)
Glyur000214s00016034	1.03423	2.88e-08	1.08e-06	yes	up	27.8433	44.0267	32.31	26.58	24.64	40.71	42.46	48.91	Glyur000214s00016034	GO:0016567(biological_process:protein ubiquitination); GO:0006511(biological_process:ubiquitin-dependent protein catabolic process)	K19043	RHF		ENOG41121N2(O:Posttranslational modification, protein turnover, chaperones)	XP_004486133.1(PREDICTED: E3 ubiquitin-protein ligase RHF1A [Cicer arietinum])	sp|Q4TU14|RHF1A_ARATH(E3 ubiquitin-protein ligase RHF1A OS=Arabidopsis thaliana OX=3702 GN=RHF1A PE=1 SV=1)	PF13639.3(zf-RING_2:Ring finger domain); PF13923.3(zf-C3HC4_2:Zinc finger, C3HC4 type (RING finger)); PF12678.4(zf-rbx1:RING-H2 zinc finger domain); PF00097.22(zf-C3HC4:Zinc finger, C3HC4 type (RING finger)); PF13445.3(zf-RING_UBOX:RING-type zinc-finger); PF17123.2(zf-RING_11:RING-like zinc finger); PF14634.3(zf-RING_5:zinc-RING finger domain); PF12861.4(zf-ANAPC11:Anaphase-promoting complex subu…
Glyur000020s00001757	1.27637	2.9e-08	1.08e-06	yes	up	64.3567	117.22	58.32	67.58	67.17	112.57	113.87	125.22	Glyur000020s00001757	GO:0010951(biological_process:negative regulation of endopeptidase activity); GO:0004869(molecular_function:cysteine-type endopeptidase inhibitor activity); GO:0008233(molecular_function:peptidase activity)				ENOG410YV6K(S:Function unknown); ENOG410YC0U(O:Posttranslational modification, protein turnover, chaperones); ENOG410YZDC(O:Posttranslational modification, protein turnover, chaperones)	XP_003543365.1(PREDICTED: cysteine proteinase inhibitor [Glycine max])	sp|Q06445|CYTI_VIGUN(Cysteine proteinase inhibitor OS=Vigna unguiculata OX=3917 PE=1 SV=1)	PF16845.2(SQAPI:Aspartic acid proteinase inhibitor); PF00031.18(Cystatin:Cystatin domain)
Glyur000056s00004108	-1.59111	2.93e-08	1.09e-06	yes	down	26.6133	6.91333	23.77	23.73	32.34	4.73	7.9	8.11	Glyur000056s00004108	GO:0008420(molecular_function:CTD phosphatase activity); GO:0016591(cellular_component:DNA-directed RNA polymerase II, holoenzyme); GO:0070940(biological_process:dephosphorylation of RNA polymerase II C-terminal domain)	K18998	CPL1_2		COG5190(K:Transcription)	XP_003545893.1(PREDICTED: RNA polymerase II C-terminal domain phosphatase-like 1 isoform X1 [Glycine max])	sp|Q5YDB6|CPL1_ARATH(RNA polymerase II C-terminal domain phosphatase-like 1 OS=Arabidopsis thaliana OX=3702 GN=CPL1 PE=1 SV=1)	PF00035.23(dsrm:Double-stranded RNA binding motif); PF03031.15(NIF:NLI interacting factor-like phosphatase)
Glyur002944s00042478	2.25833	2.96e-08	1.1e-06	yes	up	3.36333	11.98	3.61	2.2	4.28	8	11.39	16.55	Glyur002944s00042478	GO:0016491(molecular_function:oxidoreductase activity)				COG0277(C:Energy production and conversion)	XP_020234558.1(cannabidiolic acid synthase-like 2 [Cajanus cajan])	sp|Q9SVG5|BBE18_ARATH(Berberine bridge enzyme-like 18 OS=Arabidopsis thaliana OX=3702 GN=At4g20820 PE=3 SV=1)	PF01565.20(FAD_binding_4:FAD binding domain)
Glyur000513s00025369	-1.0896	3e-08	1.11e-06	yes	down	82.26	29.19	96.66	78.86	71.26	24.85	34.94	27.78	Glyur000513s00025369	GO:0006633(biological_process:fatty acid biosynthetic process); GO:0000254(molecular_function:C-4 methylsterol oxidase activity); GO:0016021(cellular_component:integral component of membrane); GO:0005506(molecular_function:iron ion binding); GO:0055114(biological_process:oxidation-reduction process); GO:0016491(molecular_function:oxidoreductase activity)	K04713	SUR2	map00600(Sphingolipid metabolism)	COG3000(S:Function unknown)	XP_003518724.1(PREDICTED: sphinganine C4-monooxygenase 1-like [Glycine max])	sp|Q8VYI1|SBH1_ARATH(Sphinganine C4-monooxygenase 1 OS=Arabidopsis thaliana OX=3702 GN=SBH1 PE=1 SV=1)	PF04116.10(FA_hydroxylase:Fatty acid hydroxylase superfamily)
Glyur000660s00025394	1.24159	3.01e-08	1.11e-06	yes	up	15.2033	26.59	16.76	12.6	16.25	28.13	24.84	26.8	Glyur000660s00025394	GO:0004252(molecular_function:serine-type endopeptidase activity); GO:0006508(biological_process:proteolysis)	K01358	clpP, CLPP	map04212(Longevity regulating pathway - worm); map04112(Cell cycle - Caulobacter)	COG0740(S:Function unknown)	XP_004515759.1(PREDICTED: ATP-dependent Clp protease proteolytic subunit-related protein 2, chloroplastic [Cicer arietinum])	sp|Q9XJ36|CLPR2_ARATH(ATP-dependent Clp protease proteolytic subunit-related protein 2, chloroplastic OS=Arabidopsis thaliana OX=3702 GN=CLPR2 PE=1 SV=1)	PF00574.20(CLP_protease:Clp protease)
Glyur000108s00010421	-1.26691	3.04e-08	1.13e-06	yes	down	196.24	60.62	269.73	140.43	178.56	48.4	66.37	67.09	Glyur000108s00010421	GO:0003899(molecular_function:DNA-directed RNA polymerase activity); GO:0032549(molecular_function:ribonucleoside binding); GO:0006351(biological_process:transcription, DNA-templated); GO:0003677(molecular_function:DNA binding)	K03010	RPB2, POLR2B	map00240(Pyrimidine metabolism); map03020(RNA polymerase); map05016(Huntington disease); map00230(Purine metabolism)	COG0085(K:Transcription)	XP_004499217.1(PREDICTED: DNA-directed RNA polymerase II subunit RPB2 [Cicer arietinum])	sp|Q42877|RPB2_SOLLC(DNA-directed RNA polymerase II subunit RPB2 OS=Solanum lycopersicum OX=4081 GN=RPB2 PE=2 SV=1)	PF00562.25(RNA_pol_Rpb2_6:RNA polymerase Rpb2, domain 6); PF04563.12(RNA_pol_Rpb2_1:RNA polymerase beta subunit); PF04561.11(RNA_pol_Rpb2_2:RNA polymerase Rpb2, domain 2); PF04565.13(RNA_pol_Rpb2_3:RNA polymerase Rpb2, domain 3); PF04560.17(RNA_pol_Rpb2_7:RNA polymerase Rpb2, domain 7); PF04566.10(RNA_pol_Rpb2_4:RNA polymerase Rpb2, domain 4); PF04567.14(RNA_pol_Rpb2_5:RNA polymerase Rpb2, domain…
Glyur000611s00026450	1.79214	3.05e-08	1.13e-06	yes	up	2.29333	6.01667	2.3	2.55	2.03	5.86	6.66	5.53	Glyur000611s00026450	GO:0009058(biological_process:biosynthetic process); GO:0016779(molecular_function:nucleotidyltransferase activity)	K00966	GMPP	map00520(Amino sugar and nucleotide sugar metabolism); map00051(Fructose and mannose metabolism)	COG1208(M:Cell wall/membrane/envelope biogenesis)	XP_020208248.1(mannose-1-phosphate guanylyltransferase 1 [Cajanus cajan])	sp|O22287|GMPP1_ARATH(Mannose-1-phosphate guanylyltransferase 1 OS=Arabidopsis thaliana OX=3702 GN=CYT1 PE=1 SV=1)	PF00483.20(NTP_transferase:Nucleotidyl transferase); PF12804.4(NTP_transf_3:MobA-like NTP transferase domain); PF00132.21(Hexapep:Bacterial transferase hexapeptide (six repeats))
Glyur001170s00029947	-1.28302	3.08e-08	1.13e-06	yes	down	80.51	25.07	85.56	55.65	100.32	22.61	29	23.6	Glyur001170s00029947	GO:0006355(biological_process:regulation of transcription, DNA-templated); GO:0005634(cellular_component:nucleus); GO:0003677(molecular_function:DNA binding); GO:0009734(biological_process:auxin-activated signaling pathway)				ENOG410YDIT(K:Transcription)	XP_007152995.1(hypothetical protein PHAVU_004G177600g [Phaseolus vulgaris])	sp|Q0D9R7|ARFS_ORYSJ(Auxin response factor 19 OS=Oryza sativa subsp. japonica OX=39947 GN=ARF19 PE=2 SV=2)	PF06507.10(Auxin_resp:Auxin response factor); PF02362.18(B3:B3 DNA binding domain)
Glyur000017s00002409	2.03948	3.11e-08	1.14e-06	yes	up	11.7633	35.7767	10.57	10.27	14.45	48.27	34.29	24.77	Glyur000017s00002409					COG0534(V:Defense mechanisms)	PNY12860.1(MATE efflux family protein chloroplastic-like [Trifolium pratense])	sp|Q8W4G3|DTX46_ARATH(Protein DETOXIFICATION 46, chloroplastic OS=Arabidopsis thaliana OX=3702 GN=DTX46 PE=2 SV=1)	PF01554.15(MatE:MatE)
Glyur000246s00016965	3.74387	3.16e-08	1.16e-06	yes	up	0.186667	1.86	0.24	0.07	0.25	2.23	1.75	1.6	Glyur000246s00016965	GO:0016021(cellular_component:integral component of membrane); GO:0005975(biological_process:carbohydrate metabolic process); GO:0008810(molecular_function:cellulase activity); GO:0030245(biological_process:cellulose catabolic process); GO:0004553(molecular_function:hydrolase activity, hydrolyzing O-glycosyl compounds)				ENOG410XPC9(G:Carbohydrate transport and metabolism)	XP_006596588.2(PREDICTED: endoglucanase 11-like [Glycine max])	sp|O48766|GUN11_ARATH(Endoglucanase 11 OS=Arabidopsis thaliana OX=3702 GN=At2g32990 PE=2 SV=1)	PF00759.16(Glyco_hydro_9:Glycosyl hydrolase family 9); PF00899.18(ThiF:ThiF family)
Glyur000074s00005574	6.11907	3.18e-08	1.16e-06	yes	up	0.0366667	1.74333	0	0	0.11	2.23	1.31	1.69	Glyur000074s00005574	GO:0016740(molecular_function:transferase activity); GO:0016020(cellular_component:membrane)				ENOG410ZHQA(S:Function unknown)	GAU12840.1(hypothetical protein TSUD_73270 [Trifolium subterraneum])		PF04577.11(DUF563:Protein of unknown function (DUF563))
Glyur001052s00025677	-2.79428	3.21e-08	1.17e-06	yes	down	29.57	3.10667	47.54	15.35	25.82	1.37	4.97	2.98	Glyur001052s00025677					ENOG410Y934(S:Function unknown); ENOG410YE99(S:Function unknown)	XP_013443654.1(F-box protein PP2-A13 [Medicago truncatula])	sp|Q9LEX0|P2A13_ARATH(F-box protein PP2-A13 OS=Arabidopsis thaliana OX=3702 GN=PP2A13 PE=1 SV=1)	PF14299.3(PP2:Phloem protein 2)
Glyur000472s00019581	8.16153	3.21e-08	1.17e-06	yes	up	0	0.926667	0	0	0	1.39	0.47	0.92	Glyur000472s00019581	GO:0046556(molecular_function:alpha-L-arabinofuranosidase activity); GO:0005975(biological_process:carbohydrate metabolic process); GO:0009044(molecular_function:xylan 1,4-beta-xylosidase activity); GO:0004553(molecular_function:hydrolase activity, hydrolyzing O-glycosyl compounds); GO:0031222(biological_process:arabinan catabolic process); GO:0045493(biological_process:xylan catabolic process); …				COG1472(G:Carbohydrate transport and metabolism)	XP_003519750.1(PREDICTED: probable beta-D-xylosidase 2 [Glycine max])	sp|Q94KD8|BXL2_ARATH(Probable beta-D-xylosidase 2 OS=Arabidopsis thaliana OX=3702 GN=BXL2 PE=2 SV=1)	PF01915.19(Glyco_hydro_3_C:Glycosyl hydrolase family 3 C-terminal domain); PF00933.18(Glyco_hydro_3:Glycosyl hydrolase family 3 N terminal domain); PF14310.3(Fn3-like:Fibronectin type III-like domain)
Glyur000189s00009624	-2.03361	3.33e-08	1.21e-06	yes	down	5.82	1.09333	6.59	5.78	5.09	0.61	1.54	1.13	Glyur000189s00009624	GO:0003700(molecular_function:transcription factor activity, sequence-specific DNA binding); GO:0000160(biological_process:phosphorelay signal transduction system); GO:0005634(cellular_component:nucleus); GO:0003677(molecular_function:DNA binding); GO:0006355(biological_process:regulation of transcription, DNA-templated)	K14491	ARR-B	map04075(Plant hormone signal transduction)	COG5641(K:Transcription); COG0745(T:Signal transduction mechanisms)	KHN12421.1(Two-component response regulator ARR11 [Glycine soja])	sp|Q5N6V8|ORR26_ORYSJ(Two-component response regulator ORR26 OS=Oryza sativa subsp. japonica OX=39947 GN=RR26 PE=3 SV=2)	PF00249.28(Myb_DNA-binding:Myb-like DNA-binding domain)
Glyur001016s00027689	1.19171	3.34e-08	1.22e-06	yes	up	57.1067	98.0667	52.8	48.28	70.24	88.06	100.25	105.89	Glyur001016s00027689	GO:0016020(cellular_component:membrane)				COG4886(S:Function unknown); ENOG410YFAF(S:Function unknown)	XP_019445810.1(PREDICTED: uncharacterized protein At4g06744-like [Lupinus angustifolius])	sp|Q8W3M4|Y4744_ARATH(Uncharacterized protein At4g06744 OS=Arabidopsis thaliana OX=3702 GN=At4g06744 PE=2 SV=1)	PF13855.3(LRR_8:Leucine rich repeat); PF08263.9(LRRNT_2:Leucine rich repeat N-terminal domain)
Glyur000063s00005841	-2.72747	3.38e-08	1.23e-06	yes	down	8.31667	0.933333	11.88	4.48	8.59	0.6	1.61	0.59	Glyur000063s00005841	GO:0004674(molecular_function:protein serine/threonine kinase activity); GO:0006468(biological_process:protein phosphorylation); GO:0016021(cellular_component:integral component of membrane); GO:0005524(molecular_function:ATP binding)				ENOG410YEGZ(T:Signal transduction mechanisms); ENOG410ZS46(T:Signal transduction mechanisms)	XP_003518230.1(PREDICTED: probable LRR receptor-like serine/threonine-protein kinase At2g23950 [Glycine max])	sp|Q8VYT3|Y4052_ARATH(Probable LRR receptor-like serine/threonine-protein kinase At4g30520 OS=Arabidopsis thaliana OX=3702 GN=At4g30520 PE=2 SV=1)	PF00069.22(Pkinase:Protein kinase domain); PF07714.14(Pkinase_Tyr:Protein tyrosine kinase); PF08263.9(LRRNT_2:Leucine rich repeat N-terminal domain); PF13855.3(LRR_8:Leucine rich repeat); PF12799.4(LRR_4:Leucine Rich repeats (2 copies))
Glyur000237s00014408	3.38166	3.4e-08	1.23e-06	yes	up	0.246667	1.81	0.5	0.12	0.12	2.05	1.6	1.78	Glyur000237s00014408	GO:0005794(cellular_component:Golgi apparatus); GO:0016021(cellular_component:integral component of membrane); GO:0097502(biological_process:mannosylation); GO:0030244(biological_process:cellulose biosynthetic process); GO:0048367(biological_process:shoot system development); GO:0071555(biological_process:cell wall organization); GO:0051753(molecular_function:mannan synthase activity); GO:0016760…	K00770	E2.4.2.24	map00520(Amino sugar and nucleotide sugar metabolism)	COG1215(U:Intracellular trafficking, secretion, and vesicular transport)	XP_020231739.1(cellulose synthase-like protein D5 [Cajanus cajan])	sp|Q9SRW9|CSLD5_ARATH(Cellulose synthase-like protein D5 OS=Arabidopsis thaliana OX=3702 GN=CSLD5 PE=2 SV=1)	PF03552.11(Cellulose_synt:Cellulose synthase); PF14570.3(zf-RING_4:RING/Ubox like zinc-binding domain); PF13632.3(Glyco_trans_2_3:Glycosyl transferase family group 2); PF13641.3(Glyco_tranf_2_3:Glycosyltransferase like family 2)
Glyur000358s00021164	-1.34449	3.44e-08	1.25e-06	yes	down	42.4	12.49	53.91	29.12	44.17	9.01	15.18	13.28	Glyur000358s00021164		K14972	PAXIP1, PTIP		ENOG4111KNE(S:Function unknown)	XP_003533074.1(PREDICTED: mediator of RNA polymerase II transcription subunit 15a-like isoform X1 [Glycine max])	sp|F4I171|MD15A_ARATH(Mediator of RNA polymerase II transcription subunit 15a OS=Arabidopsis thaliana OX=3702 GN=MED15A PE=1 SV=1)	PF16987.2(KIX_2:KIX domain)
Glyur000120s00006075	1.60596	3.45e-08	1.25e-06	yes	up	4.56333	11.5433	4.53	3.27	5.89	11.12	10.77	12.74	Glyur000120s00006075	GO:0031418(molecular_function:L-ascorbic acid binding); GO:0016021(cellular_component:integral component of membrane); GO:0016705(molecular_function:oxidoreductase activity, acting on paired donors, with incorporation or reduction of molecular oxygen); GO:0005506(molecular_function:iron ion binding); GO:0055114(biological_process:oxidation-reduction process)	K00472	P4HA	map00330(Arginine and proline metabolism)	ENOG410XS5J(S:Function unknown)	XP_020218398.1(probable prolyl 4-hydroxylase 10 [Cajanus cajan])	sp|F4JZ24|P4H10_ARATH(Probable prolyl 4-hydroxylase 10 OS=Arabidopsis thaliana OX=3702 GN=P4H10 PE=3 SV=1)	PF13640.3(2OG-FeII_Oxy_3:2OG-Fe(II) oxygenase superfamily); PF03171.17(2OG-FeII_Oxy:2OG-Fe(II) oxygenase superfamily)
Glyur000214s00016007	1.71022	3.49e-08	1.26e-06	yes	up	4.46667	11.1567	4.77	4.77	3.86	8.28	10.32	14.87	Glyur000214s00016007	GO:0005737(cellular_component:cytoplasm); GO:0030001(biological_process:metal ion transport); GO:0046872(molecular_function:metal ion binding); GO:0046916(biological_process:cellular transition metal ion homeostasis); GO:0046914(molecular_function:transition metal ion binding)				COG2608(S:Function unknown)	KHN33061.1(hypothetical protein glysoja_010052 [Glycine soja])	sp|Q9M8K5|HIP32_ARATH(Heavy metal-associated isoprenylated plant protein 32 OS=Arabidopsis thaliana OX=3702 GN=HIPP32 PE=2 SV=1)	PF00403.23(HMA:Heavy-metal-associated domain)
Glyur000014s00002540	6.57831	3.62e-08	1.3e-06	yes	up	2.00667	151.58	0.34	4.44	1.24	273.1	144.61	37.03	Glyur000014s00002540	GO:0008168(molecular_function:methyltransferase activity); GO:0008757(molecular_function:S-adenosylmethionine-dependent methyltransferase activity); GO:0008171(molecular_function:O-methyltransferase activity); GO:0019438(biological_process:aromatic compound biosynthetic process)	K16040	ROMT	map00945(Stilbenoid, diarylheptanoid and gingerol biosynthesis)	ENOG410XS7T(S:Function unknown)	XP_003607523.3(trans-resveratrol di-O-methyltransferase [Medicago truncatula])	sp|B0ZB57|OMT3_HUMLU(Probable O-methyltransferase 3 OS=Humulus lupulus OX=3486 GN=OMT3 PE=2 SV=1)	PF00891.15(Methyltransf_2:O-methyltransferase); PF08100.8(Dimerisation:Dimerisation domain)
Glyur000391s00016079	-3.98654	3.67e-08	1.31e-06	yes	down	65.9367	3.49	23.14	86.46	88.21	0.88	4.48	5.11	Glyur000391s00016079
Glyur000449s00027100	1.42942	3.67e-08	1.31e-06	yes	up	5.43667	11.1833	4.69	5.73	5.89	10.19	11.61	11.75	Glyur000449s00027100	GO:0006508(biological_process:proteolysis); GO:0004190(molecular_function:aspartic-type endopeptidase activity); GO:0030163(biological_process:protein catabolic process)				ENOG410XNV7(S:Function unknown)	XP_003552102.1(PREDICTED: aspartic proteinase-like protein 1 [Glycine max])	sp|Q9LX20|ASPL1_ARATH(Aspartic proteinase-like protein 1 OS=Arabidopsis thaliana OX=3702 GN=At5g10080 PE=1 SV=1)	PF14543.3(TAXi_N:Xylanase inhibitor N-terminal); PF00026.20(Asp:Eukaryotic aspartyl protease); PF14541.3(TAXi_C:Xylanase inhibitor C-terminal)
Glyur000212s00017509	1.75391	3.78e-08	1.35e-06	yes	up	2.75	7.08333	2.1	3.07	3.08	7.29	6.61	7.35	Glyur000212s00017509	GO:0006468(biological_process:protein phosphorylation); GO:0016021(cellular_component:integral component of membrane); GO:0005524(molecular_function:ATP binding); GO:0004672(molecular_function:protein kinase activity)				COG0515(K:Transcription); COG4886(K:Transcription)	XP_004511796.1(PREDICTED: leucine-rich repeat receptor-like serine/threonine-protein kinase BAM1 [Cicer arietinum])	sp|O49545|BAME1_ARATH(Leucine-rich repeat receptor-like serine/threonine-protein kinase BAM1 OS=Arabidopsis thaliana OX=3702 GN=BAM1 PE=1 SV=1)	PF00069.22(Pkinase:Protein kinase domain); PF07714.14(Pkinase_Tyr:Protein tyrosine kinase); PF13855.3(LRR_8:Leucine rich repeat); PF12799.4(LRR_4:Leucine Rich repeats (2 copies)); PF08263.9(LRRNT_2:Leucine rich repeat N-terminal domain)
Glyur000510s00021549	-2.01246	3.81e-08	1.36e-06	yes	down	10.9167	2.26	12.4	7.75	12.6	1.74	2.59	2.45	Glyur000510s00021549	GO:0016021(cellular_component:integral component of membrane); GO:0016740(molecular_function:transferase activity)	K11426	SMYD		COG2940(S:Function unknown)	XP_014630481.1(PREDICTED: histone-lysine N-methyltransferase ASHR1 isoform X2 [Glycine max])	sp|Q7XJS0|ASHR1_ARATH(Histone-lysine N-methyltransferase ASHR1 OS=Arabidopsis thaliana OX=3702 GN=ASHR1 PE=1 SV=2)	PF00856.25(SET:SET domain); PF01753.15(zf-MYND:MYND finger); PF13424.3(TPR_12:Tetratricopeptide repeat); PF07719.14(TPR_2:Tetratricopeptide repeat); PF13181.3(TPR_8:Tetratricopeptide repeat)
Glyur000052s00005803	-1.07694	3.81e-08	1.36e-06	yes	down	16.93	5.98333	19.75	12.48	18.56	5.82	6.81	5.32	Glyur000052s00005803	GO:0005634(cellular_component:nucleus); GO:0005524(molecular_function:ATP binding); GO:0016887(molecular_function:ATPase activity); GO:0000027(biological_process:ribosomal large subunit assembly)	K14572	MDN1, REA1	map03008(Ribosome biogenesis in eukaryotes)	COG5271(S:Function unknown)	XP_012574078.1(PREDICTED: LOW QUALITY PROTEIN: midasin [Cicer arietinum])	sp|A0A1P8AUY4|MDN1_ARATH(Midasin OS=Arabidopsis thaliana OX=3702 GN=MDN1 PE=1 SV=1)	PF07728.11(AAA_5:AAA domain (dynein-related subfamily)); PF07726.8(AAA_3:ATPase family associated with various cellular activities (AAA)); PF00004.26(AAA:ATPase family associated with various cellular activities (AAA))
Glyur003215s00039011	-1.03758	3.9e-08	1.39e-06	yes	down	73.4767	27.0967	86.81	58.7	74.92	20.25	31.81	29.23	Glyur003215s00039011	GO:0005737(cellular_component:cytoplasm); GO:0008026(molecular_function:ATP-dependent helicase activity); GO:0005634(cellular_component:nucleus); GO:0004004(molecular_function:ATP-dependent RNA helicase activity); GO:0005524(molecular_function:ATP binding); GO:0003676(molecular_function:nucleic acid binding); GO:0044822(molecular_function:poly(A) RNA binding); GO:0006396(biological_process:RNA pr…	K14442	DHX36, RHAU	map03018(RNA degradation)	COG1643(S:Function unknown)	XP_023881990.1(DExH-box ATP-dependent RNA helicase DExH1 isoform X1 [Quercus suber])	sp|F4ILR7|DEXH1_ARATH(DExH-box ATP-dependent RNA helicase DExH1 OS=Arabidopsis thaliana OX=3702 GN=At2g35920 PE=2 SV=1)	PF00270.26(DEAD:DEAD/DEAH box helicase); PF00437.17(T2SSE:Type II/IV secretion system protein)
Glyur003951s00041902	3.05645	3.93e-08	1.4e-06	yes	up	0.466667	3.02	0.37	0.69	0.34	2.34	3.01	3.71	Glyur003951s00041902					ENOG4111ZZY(S:Function unknown)	XP_020218179.1(uncharacterized protein LOC109801507 [Cajanus cajan])		PF07059.9(DUF1336:Protein of unknown function (DUF1336))
Glyur002189s00039217	1.92213	3.97e-08	1.41e-06	yes	up	42.0667	117.21	34.29	49.45	42.46	144.47	118.15	89.01	Glyur002189s00039217	GO:0006508(biological_process:proteolysis); GO:0046872(molecular_function:metal ion binding); GO:0070084(biological_process:protein initiator methionine removal); GO:0009507(cellular_component:chloroplast); GO:0070006(molecular_function:metalloaminopeptidase activity)	K01265	map		COG0024(S:Function unknown)	XP_004514326.1(PREDICTED: methionine aminopeptidase 1B, chloroplastic-like [Cicer arietinum])	sp|Q9FV52|MAP1B_ARATH(Methionine aminopeptidase 1B, chloroplastic OS=Arabidopsis thaliana OX=3702 GN=MAP1B PE=2 SV=2)	PF06351.8(Allene_ox_cyc:Allene oxide cyclase)
Glyur000181s00013073	4.42446	3.98e-08	1.41e-06	yes	up	93.39	1649.81	19.7	223.48	36.99	1830.78	1479.96	1638.68	Glyur000181s00013073	GO:0050662(molecular_function:coenzyme binding); GO:0003824(molecular_function:catalytic activity)	K12449	AXS	map00520(Amino sugar and nucleotide sugar metabolism)	COG0451(M:Cell wall/membrane/envelope biogenesis)	XP_019453906.1(PREDICTED: UDP-D-apiose/UDP-D-xylose synthase 2 [Lupinus angustifolius])	sp|Q9SGE0|AXS2_ARATH(UDP-D-apiose/UDP-D-xylose synthase 2 OS=Arabidopsis thaliana OX=3702 GN=AXS2 PE=2 SV=1)	PF01370.18(Epimerase:NAD dependent epimerase/dehydratase family); PF16363.2(GDP_Man_Dehyd:GDP-mannose 4,6 dehydratase); PF02719.12(Polysacc_synt_2:Polysaccharide biosynthesis protein); PF03435.15(Sacchrp_dh_NADP:Saccharopine dehydrogenase NADP binding domain); PF07993.9(NAD_binding_4:Male sterility protein); PF01073.16(3Beta_HSD:3-beta hydroxysteroid dehydrogenase/isomerase family)
Glyur001061s00037040	8.12364	4.01e-08	1.42e-06	yes	up	0	3.32	0	0	0	1.51	2.78	5.67	Glyur001061s00037040	GO:0016020(cellular_component:membrane)				ENOG410ZKCS(S:Function unknown)	XP_017438249.1(PREDICTED: UPF0481 protein At3g47200-like [Vigna angularis])	sp|Q9SD53|Y3720_ARATH(UPF0481 protein At3g47200 OS=Arabidopsis thaliana OX=3702 GN=At3g47200 PE=2 SV=1)	PF03140.12(DUF247:Plant protein of unknown function)
Glyur000055s00004567	1.98815	4.01e-08	1.42e-06	yes	up	2.80333	7.78333	2.91	1.79	3.71	7.59	6.73	9.03	Glyur000055s00004567					ENOG410YQ35(S:Function unknown)	AFK48170.1(unknown [Lotus japonicus])	sp|B9HMP6|CSPL7_POPTR(CASP-like protein 1E1 OS=Populus trichocarpa OX=3694 GN=POPTRDRAFT_820934 PE=3 SV=2)	PF04535.9(DUF588:Domain of unknown function (DUF588))
Glyur000325s00013496	-1.1199	4.08e-08	1.44e-06	yes	down	77.8333	26.8833	87.86	57.85	87.79	20.91	28.77	30.97	Glyur000325s00013496	GO:0031668(biological_process:cellular response to extracellular stimulus); GO:0016049(biological_process:cell growth); GO:0005634(cellular_component:nucleus); GO:0019789(molecular_function:SUMO transferase activity); GO:0008270(molecular_function:zinc ion binding); GO:0016925(biological_process:protein sumoylation); GO:0016874(molecular_function:ligase activity)				ENOG410XQ2E(S:Function unknown)	XP_004505964.1(PREDICTED: E3 SUMO-protein ligase SIZ1-like [Cicer arietinum])	sp|Q680Q4|SIZ1_ARATH(E3 SUMO-protein ligase SIZ1 OS=Arabidopsis thaliana OX=3702 GN=SIZ1 PE=1 SV=2)	PF02891.17(zf-MIZ:MIZ/SP-RING zinc finger); PF02037.24(SAP:SAP domain); PF00628.26(PHD:PHD-finger)
Glyur000060s00004730	-1.99542	4.12e-08	1.45e-06	yes	down	15.6067	2.94333	22.52	15.62	8.68	2.05	3.7	3.08	Glyur000060s00004730
Glyur002121s00033330	4.97596	4.21e-08	1.48e-06	yes	up	0.163333	3.71	0	0.15	0.34	5.81	2.89	2.43	Glyur002121s00033330	GO:0016722(molecular_function:oxidoreductase activity, oxidizing metal ions); GO:0052716(molecular_function:hydroquinone:oxygen oxidoreductase activity); GO:0009809(biological_process:lignin biosynthetic process); GO:0048046(cellular_component:apoplast); GO:0046274(biological_process:lignin catabolic process); GO:0005507(molecular_function:copper ion binding); GO:0055114(biological_process:oxidat…	K05909	E1.10.3.2		COG2132(S:Function unknown)	XP_003603035.3(laccase-15 [Medicago truncatula])	sp|Q84J37|LAC15_ARATH(Laccase-15 OS=Arabidopsis thaliana OX=3702 GN=TT10 PE=1 SV=1)	PF07732.12(Cu-oxidase_3:Multicopper oxidase); PF07731.11(Cu-oxidase_2:Multicopper oxidase); PF00394.19(Cu-oxidase:Multicopper oxidase)
Glyur000176s00012097	-1.32636	4.27e-08	1.5e-06	yes	down	38.83	11.5167	42.33	27.84	46.32	11.12	13.44	9.99	Glyur000176s00012097		K14829	IPI3		COG2319(S:Function unknown)	XP_020211750.1(protein ROOT INITIATION DEFECTIVE 3 [Cajanus cajan])	sp|Q9M3B4|RID3_ARATH(Protein ROOT INITIATION DEFECTIVE 3 OS=Arabidopsis thaliana OX=3702 GN=RID3 PE=1 SV=1)	PF00400.29(WD40:WD domain, G-beta repeat); PF12894.4(ANAPC4_WD40:Anaphase-promoting complex subunit 4 WD40 domain)
Glyur000717s00025337	8.78002	4.47e-08	1.57e-06	yes	up	2.94667	1075.26	0.19	8.47	0.18	1568.84	999.55	657.4	Glyur000717s00025337	GO:0051603(biological_process:proteolysis involved in cellular protein catabolic process); GO:0005615(cellular_component:extracellular space); GO:0005764(cellular_component:lysosome); GO:0004197(molecular_function:cysteine-type endopeptidase activity); GO:0006508(biological_process:proteolysis); GO:0008234(molecular_function:cysteine-type peptidase activity)	K01365	CTSL	map05205(Proteoglycans in cancer); map05323(Rheumatoid arthritis); map04612(Antigen processing and presentation); map05418(Fluid shear stress and atherosclerosis); map04145(Phagosome); map04210(Apoptosis); map04142(Lysosome); map04140(Autophagy - animal)	COG4870(O:Posttranslational modification, protein turnover, chaperones)	XP_012572291.1(PREDICTED: ervatamin-B-like [Cicer arietinum])	sp|P22895|P34_SOYBN(P34 probable thiol protease OS=Glycine max OX=3847 PE=1 SV=1)	PF00112.20(Peptidase_C1:Papain family cysteine protease); PF08246.9(Inhibitor_I29:Cathepsin propeptide inhibitor domain (I29)); PF03051.12(Peptidase_C1_2:Peptidase C1-like family)
Glyur007785s00045198	1.36397	4.5e-08	1.57e-06	yes	up	8.82	15.4233	7.83	9.01	9.62	15.56	16.27	14.44	Glyur007785s00045198	GO:0004416(molecular_function:hydroxyacylglutathione hydrolase activity); GO:0019243(biological_process:methylglyoxal catabolic process to D-lactate via S-lactoyl-glutathione)	K01069	gloB, gloC, HAGH	map00620(Pyruvate metabolism)	ENOG4111FEZ(Q:Secondary metabolites biosynthesis, transport and catabolism); COG0491(S:Function unknown)	XP_020217352.1(probable hydroxyacylglutathione hydrolase 2, chloroplastic [Cajanus cajan])	sp|O24495|GLO2M_ARATH(Hydroxyacylglutathione hydrolase 1, mitochondrial OS=Arabidopsis thaliana OX=3702 GN=GLX2-1 PE=2 SV=2)	PF00753.24(Lactamase_B:Metallo-beta-lactamase superfamily)
Glyur000664s00026065	3.302	4.52e-08	1.57e-06	yes	up	0.78	5.6	0.88	0.65	0.81	6.18	5.66	4.96	Glyur000664s00026065	GO:0016538(molecular_function:cyclin-dependent protein serine/threonine kinase regulator activity); GO:0045859(biological_process:regulation of protein kinase activity); GO:0007049(biological_process:cell cycle); GO:0016301(molecular_function:kinase activity); GO:0051301(biological_process:cell division)	K02219	CKS1	map04111(Cell cycle - yeast); map05200(Pathways in cancer); map05222(Small cell lung cancer)	ENOG4111UAN(T:Signal transduction mechanisms); COG4638(T:Signal transduction mechanisms)	OAY72492.1(Cyclin-dependent kinases regulatory subunit 2, partial [Ananas comosus])	sp|Q6PS57|CKS1_ORYSJ(Cyclin-dependent kinases regulatory subunit 1 OS=Oryza sativa subsp. japonica OX=39947 GN=CKS1 PE=2 SV=1)	PF01111.16(CKS:Cyclin-dependent kinase regulatory subunit)
Glyur002066s00031965	1.91158	4.52e-08	1.57e-06	yes	up	6.89667	19.9167	7.03	8.4	5.26	14.71	20.25	24.79	Glyur002066s00031965	GO:0005794(cellular_component:Golgi apparatus); GO:0000271(biological_process:polysaccharide biosynthetic process); GO:0016757(molecular_function:transferase activity, transferring glycosyl groups)				ENOG41106K3(S:Function unknown)	XP_007145178.1(hypothetical protein PHAVU_007G217100g [Phaseolus vulgaris])	sp|Q8VYF4|GATL7_ARATH(Probable galacturonosyltransferase-like 7 OS=Arabidopsis thaliana OX=3702 GN=GATL7 PE=2 SV=1)	PF01501.17(Glyco_transf_8:Glycosyl transferase family 8)
Glyur000128s00010797	1.11296	4.65e-08	1.62e-06	yes	up	36.2467	58.5767	35.93	33.34	39.47	61.12	57.3	57.31	Glyur000128s00010797	GO:0005506(molecular_function:iron ion binding); GO:0051213(molecular_function:dioxygenase activity); GO:0055114(biological_process:oxidation-reduction process); GO:0016491(molecular_function:oxidoreductase activity)				COG3491(S:Function unknown)	KHN32374.1(Gibberellin 20 oxidase 1 [Glycine soja])	sp|Q9FFF6|DIOX5_ARATH(Probable 2-oxoglutarate-dependent dioxygenase At5g05600 OS=Arabidopsis thaliana OX=3702 GN=At5g05600 PE=2 SV=1)	PF14226.3(DIOX_N:non-haem dioxygenase in morphine synthesis N-terminal); PF03171.17(2OG-FeII_Oxy:2OG-Fe(II) oxygenase superfamily)
Glyur001546s00030183	7.67146	4.7e-08	1.63e-06	yes	up	0	0.673333	0	0	0	0.6	0.78	0.64	Glyur001546s00030183	GO:0046556(molecular_function:alpha-L-arabinofuranosidase activity); GO:0045493(biological_process:xylan catabolic process); GO:0016021(cellular_component:integral component of membrane); GO:0005578(cellular_component:proteinaceous extracellular matrix); GO:0009505(cellular_component:plant-type cell wall); GO:0004553(molecular_function:hydrolase activity, hydrolyzing O-glycosyl compounds); GO:003…	K15920	XYL4	map00520(Amino sugar and nucleotide sugar metabolism)	COG1472(G:Carbohydrate transport and metabolism)	XP_007148433.1(hypothetical protein PHAVU_006G208200g [Phaseolus vulgaris])	sp|A5JTQ2|XYL1_MEDSV(Beta-xylosidase/alpha-L-arabinofuranosidase 1 (Fragment) OS=Medicago sativa subsp. varia OX=36902 GN=Xyl1 PE=1 SV=1)	PF00933.18(Glyco_hydro_3:Glycosyl hydrolase family 3 N terminal domain); PF01915.19(Glyco_hydro_3_C:Glycosyl hydrolase family 3 C-terminal domain); PF14310.3(Fn3-like:Fibronectin type III-like domain)
Glyur000606s00017345	6.80648	4.84e-08	1.68e-06	yes	up	6.54667	571.747	0.22	9.25	10.17	745.94	524.59	444.71	Glyur000606s00017345	GO:0003824(molecular_function:catalytic activity); GO:0016021(cellular_component:integral component of membrane); GO:0009116(biological_process:nucleoside metabolic process)				COG0775(F:Nucleotide transport and metabolism)	KRH52719.1(hypothetical protein GLYMA_06G084200 [Glycine max])	sp|Q07469|BSPA_POPDE(Bark storage protein A OS=Populus deltoides OX=3696 GN=BSPA PE=2 SV=1)	PF01048.17(PNP_UDP_1:Phosphorylase superfamily)
Glyur001528s00028668	1.67576	4.91e-08	1.7e-06	yes	up	2.59	6.24333	2.29	2.65	2.83	7.1	5.9	5.73	Glyur001528s00028668	GO:0044255(biological_process:cellular lipid metabolic process); GO:0052689(molecular_function:carboxylic ester hydrolase activity)				ENOG410XQFK(S:Function unknown)	XP_020220912.1(protein FAM135B-like isoform X1 [Cajanus cajan])	sp|Q9DAI6|F135B_MOUSE(Protein FAM135B OS=Mus musculus OX=10090 GN=Fam135b PE=1 SV=3)	PF05057.11(DUF676:Putative serine esterase (DUF676)); PF12394.5(DUF3657:Protein of unknown function (DUF3657))
Glyur000096s00005951	1.76445	5e-08	1.73e-06	yes	up	1.71333	4.48333	1.27	1.99	1.88	4.16	4.66	4.63	Glyur000096s00005951	GO:0003824(molecular_function:catalytic activity)				COG5441(S:Function unknown)	XP_004509303.1(PREDICTED: uncharacterized protein LOC101503122 [Cicer arietinum])	sp|A4FLF6|Y5696_SACEN(UPF0261 protein SACE_5696 OS=Saccharopolyspora erythraea (strain ATCC 11635 / DSM 40517 / JCM 4748 / NBRC 13426 / NCIMB 8594 / NRRL 2338) OX=405948 GN=SACE_5696 PE=3 SV=1)	PF06792.8(UPF0261:Uncharacterised protein family (UPF0261)); PF09370.7(PEP_hydrolase:Phosphoenolpyruvate hydrolase-like)
Glyur001480s00032564	2.64191	5.01e-08	1.73e-06	yes	up	54.2433	240.777	100.31	25.47	36.95	173	204.68	344.65	Glyur001480s00032564
Glyur000066s00006237	7.68068	5.04e-08	1.74e-06	yes	up	0	3.39667	0	0	0	3.51	3.17	3.51	Glyur000066s00006237					ENOG410YFHZ(M:Cell wall/membrane/envelope biogenesis); ENOG41106XV(G:Carbohydrate transport and metabolism)	XP_007152043.1(hypothetical protein PHAVU_004G096900g [Phaseolus vulgaris])	sp|Q8LEJ6|FLA11_ARATH(Fasciclin-like arabinogalactan protein 11 OS=Arabidopsis thaliana OX=3702 GN=FLA11 PE=2 SV=2)	PF02469.19(Fasciclin:Fasciclin domain)
Glyur001359s00026912	2.22759	5.1e-08	1.75e-06	yes	up	16.91	60.55	11.81	21.1	17.82	75.89	65.14	40.62	Glyur001359s00026912	GO:0016810(molecular_function:hydrolase activity, acting on carbon-nitrogen (but not peptide) bonds); GO:0046872(molecular_function:metal ion binding); GO:0006807(biological_process:nitrogen compound metabolic process)	K01427	URE	map00220(Arginine biosynthesis); map00230(Purine metabolism); map00791(Atrazine degradation)	COG0832(E:Amino acid transport and metabolism)	KYP75695.1(Urease [Cajanus cajan])	sp|P07374|UREA_CANEN(Urease OS=Canavalia ensiformis OX=3823 PE=1 SV=3)	PF01979.17(Amidohydro_1:Amidohydrolase family); PF00449.17(Urease_alpha:Urease alpha-subunit, N-terminal domain); PF00699.17(Urease_beta:Urease beta subunit); PF00547.15(Urease_gamma:Urease, gamma subunit); PF07969.8(Amidohydro_3:Amidohydrolase family)
Glyur002362s00039700	3.95287	5.16e-08	1.77e-06	yes	up	0.996667	7.90333	2.1	0.41	0.48	9.18	8.29	6.24	Glyur002362s00039700					ENOG4111AMT(S:Function unknown)	XP_019462077.1(PREDICTED: uncharacterized protein LOC109361176 [Lupinus angustifolius])		PF09682.7(Phage_holin_6_1:Bacteriophage holin of superfamily 6 (Holin_LLH))
Glyur000167s00012268	4.02128	5.3e-08	1.82e-06	yes	up	0.346667	4.33333	0.4	0.57	0.07	4.2	3.5	5.3	Glyur000167s00012268	GO:0005737(cellular_component:cytoplasm); GO:0031625(molecular_function:ubiquitin protein ligase binding); GO:0016874(molecular_function:ligase activity); GO:0016021(cellular_component:integral component of membrane); GO:0031145(biological_process:anaphase-promoting complex-dependent catabolic process); GO:0030071(biological_process:regulation of mitotic metaphase/anaphase transition); GO:0005634…	K06688	UBE2C, UBC11	map04120(Ubiquitin mediated proteolysis)	ENOG4111IGV(O:Posttranslational modification, protein turnover, chaperones)	XP_007131564.1(hypothetical protein PHAVU_011G023800g [Phaseolus vulgaris])	sp|Q8L7T3|UBC20_ARATH(Ubiquitin-conjugating enzyme E2 20 OS=Arabidopsis thaliana OX=3702 GN=UBC20 PE=2 SV=1)	PF00179.23(UQ_con:Ubiquitin-conjugating enzyme); PF05773.19(RWD:RWD domain)
Glyur000672s00022924	2.59411	5.31e-08	1.82e-06	yes	up	1.05333	3.96333	1.32	1.06	0.78	5.48	3.74	2.67	Glyur000672s00022924	GO:0019752(biological_process:carboxylic acid metabolic process)	K01850	E5.4.99.5	map00400(Phenylalanine, tyrosine and tryptophan biosynthesis)	COG1605(E:Amino acid transport and metabolism)	XP_003588838.2(chorismate mutase 2 isoform X1 [Medicago truncatula])	sp|Q9S7H4|CM2_ARATH(Chorismate mutase 2 OS=Arabidopsis thaliana OX=3702 GN=CM2 PE=1 SV=1)
Glyur002181s00036481	6.48332	5.33e-08	1.82e-06	yes	up	0.02	1.25333	0	0.03	0.03	1.47	1.13	1.16	Glyur002181s00036481	GO:0006468(biological_process:protein phosphorylation); GO:0016021(cellular_component:integral component of membrane); GO:0005524(molecular_function:ATP binding); GO:0004672(molecular_function:protein kinase activity)				COG0515(T:Signal transduction mechanisms)	KHN02093.1(Putative LRR receptor-like serine/threonine-protein kinase [Glycine soja])	sp|Q9LYN6|Y3565_ARATH(Probable inactive receptor-like protein kinase At3g56050 OS=Arabidopsis thaliana OX=3702 GN=At3g56050 PE=2 SV=1)	PF07714.14(Pkinase_Tyr:Protein tyrosine kinase); PF00069.22(Pkinase:Protein kinase domain); PF08263.9(LRRNT_2:Leucine rich repeat N-terminal domain); PF13855.3(LRR_8:Leucine rich repeat)
Glyur000407s00023577	2.29161	5.53e-08	1.89e-06	yes	up	0.596667	2.45333	0.6	0.69	0.5	2.87	2.22	2.27	Glyur000407s00023577	GO:0071554(biological_process:cell wall organization or biogenesis); GO:0005794(cellular_component:Golgi apparatus); GO:0016021(cellular_component:integral component of membrane); GO:0016413(molecular_function:O-acetyltransferase activity); GO:0010411(biological_process:xyloglucan metabolic process)				ENOG410YAVP(S:Function unknown)	OAY64637.1(Protein ALTERED XYLOGLUCAN 4, partial [Ananas comosus])	sp|O04523|TBL27_ARATH(Protein ALTERED XYLOGLUCAN 4 OS=Arabidopsis thaliana OX=3702 GN=AXY4 PE=1 SV=1)	PF13839.3(PC-Esterase:GDSL/SGNH-like Acyl-Esterase family found in Pmr5 and Cas1p); PF14416.3(PMR5N:PMR5 N terminal Domain)
Glyur000593s00016432	-1.63802	5.55e-08	1.89e-06	yes	down	41.8633	9.94333	53.97	24.55	47.07	9.94	12.11	7.78	Glyur000593s00016432	GO:0032040(cellular_component:small-subunit processome); GO:0005730(cellular_component:nucleolus); GO:0005634(cellular_component:nucleus); GO:0003723(molecular_function:RNA binding); GO:0003676(molecular_function:nucleic acid binding); GO:0006396(biological_process:RNA processing); GO:0006397(biological_process:mRNA processing)	K14792	RRP5, PDCD11		COG0539(J:Translation, ribosomal structure and biogenesis)	KHN00023.1(Protein RRP5 like [Glycine soja])	sp|F4J8K6|RRP5_ARATH(rRNA biogenesis protein RRP5 OS=Arabidopsis thaliana OX=3702 GN=RRP5 PE=2 SV=2)	PF00575.20(S1:S1 RNA binding domain); PF05843.11(Suf:Suppressor of forked protein (Suf))
Glyur000010s00000975	3.56396	5.65e-08	1.92e-06	yes	up	1.54667	14.0733	1.14	2.45	1.05	13.19	11.52	17.51	Glyur000010s00000975					ENOG4111B8R(S:Function unknown)	XP_006580211.1(PREDICTED: uncharacterized protein LOC102662390 [Glycine max])
[truncated: 3,037 more rows]
